# Supplementary material for: Understanding the Effect of COVID-19 Pandemic on Emergency Surgical Care Delivery in India: A Multicenter Cross-sectional Study
Source: Research Square preprint supplement (doi:10.21203/rs.3.rs-1543145/v1), 2022-04-22
Supplement: Supplementary file 1 [file bf8222a3de0c0f31b3a83d38.xlsx]

## Sheet: IndSurg-1|Part-2
No	Source	Hosp	Hosp_Tag	DD	Department	Rev_Dept1	Date	Diagnosis	Name of surgery	Rev_Sx_Name	BellwetherProcedures	Age	Sex	Anesthesia	Rev_Anaesthesia	Essential	Esse_Rev	NIH prioritization	NIH prioritization_Rev1	ASA Category	Emergency/Elective
25	PB File	MAMC	Hosp-3	Apr-19	Gen.Surgery	GenSx	2019-03-04		Amputation Stump closure	Amputation		40	F	SA	Regional Anesthesia: Spinal, Epidural and Regional Blocks	Non-Essential	Non-Essential	1	1		Emergency
26	PB File	MAMC	Hosp-3	Apr-19	Gen.Surgery	GenSx	2019-12-04		Transmetatarsal amputation	Amputation		63	F	LA	Local anesthesia not supplemented by sedation or GA	Non-Essential	Non-Essential	1	1		Emergency
27	PB File	MAMC	Hosp-3	Apr-19	Surgery ward	GenSx	2019-01-04		A/K Revision Amputation Lt Leg	Amputation		60	M	GA	General Anaesthesia	Non-Essential	Non-Essential	1	1		Emergency
28	PB File	MAMC	Hosp-3	Apr-19	Ortho Em	Ortho	2019-05-04		Fixator revision + Toe amputation	Amputation		50	M	GA	General Anaesthesia	Non-Essential	Non-Essential	1	1		Emergency
29	PB File	MAMC	Hosp-3	Apr-19	Surgery Em	GenSx	2019-09-04		A K Amputation (wet gangrene)	Amputation		52	M	SA	Regional Anesthesia: Spinal, Epidural and Regional Blocks	Non-Essential	Non-Essential	1	1		Emergency
30	PB File	MAMC	Hosp-3	Apr-19	Surgery Em	GenSx	2019-04-21		Forefoot amputation	Amputation		65	M	GA	General Anaesthesia	Non-Essential	Non-Essential	1	1		Emergency
31	PB File	MAMC	Hosp-3	Apr-19	Surgery Em	GenSx	2019-04-22		B/K amupation (leg amputation)	Amputation		47	M	GA	General Anaesthesia	Non-Essential	Non-Essential	1	1		Emergency
32	PB File	MAMC	Hosp-3	Apr-19	Ortho Em	Ortho	2019-04-22		Lt hand Amputation (RTA)	Amputation		17	M	GA	General Anaesthesia	Non-Essential	Non-Essential	1	1		Emergency
33	PB File	MAMC	Hosp-3	Apr-19	Ortho Em	Ortho	2019-04-25		A/K Amputation	Amputation		25	F	GA	General Anaesthesia	Non-Essential	Non-Essential	1	1		Emergency
34	PB File	MAMC	Hosp-3	Apr-19	Ortho Em	Ortho	2019-04-26		b/K Amputation (RTA with mangled limb)	Amputation		28	M	GA	General Anaesthesia	Non-Essential	Non-Essential	1	1		Emergency
35	PB File	MAMC	Hosp-3	Apr-19	Ortho Em	Ortho	2019-04-27		Amputation on R Index finger (Crush injury right hand)	Amputation		42	M	GA	General Anaesthesia	Non-Essential	Non-Essential	1	1		Emergency
36	PB File	MAMC	Hosp-3	Apr-19	Surgery Em	GenSx	2019-04-28		B/K Amputation (LT) for Foreport wet gangrene	Amputation		65	M	GA	General Anaesthesia	Non-Essential	Non-Essential	1	1		Emergency
45	PB File	Terna	Hosp-5	Apr-19	General Surgery	GenSx	2019-08-04		SYME'S AMPUTATION OF LEFT FOOT	Amputation		999	M	SA	Regional Anesthesia: Spinal, Epidural and Regional Blocks	Non-Essential	Non-Essential	1	1		Emergency
46	PB File	Terna	Hosp-5	Apr-19	General Surgery	GenSx	30/04/2019		BELOW KNEE AMPUTATION FOR PROGRESSING GANGRENE	Amputation		999	M	SA	Regional Anesthesia: Spinal, Epidural and Regional Blocks	Non-Essential	Non-Essential	1	1		Emergency
63	PB File	KEM	Hosp-2	Apr-19	Orthopedics	Ortho	2019-04-01		Rt BKA and left AKA	Amputation		71	M	GA	General Anaesthesia	Non-Essential	Non-Essential	1	1		Emergency
64	PB File	KEM	Hosp-2	Apr-19	Orthopedics	Ortho	2019-04-01		Rays amputation of rt great toe	Amputation		54	M	LA	Local anesthesia not supplemented by sedation or GA	Non-Essential	Non-Essential	1	1		Emergency
65	PB File	KEM	Hosp-2	Apr-19	Orthopedics	Ortho	2019-04-02		Rt BKA and left AKA	Amputation		70	M	GA	General Anaesthesia	Non-Essential	Non-Essential	1	1		Emergency
66	PB File	KEM	Hosp-2	Apr-19	Orthopedics	Ortho	2019-04-02		Left foot Rays amputation of great toe SOS TMT	Amputation		84	F	LA	Local anesthesia not supplemented by sedation or GA	Non-Essential	Non-Essential	1	1		Emergency
67	PB File	KEM	Hosp-2	Apr-19	Orthopedics	Ortho	2019-04-02		Left AKA	Amputation		55	M	Femoral block	Regional Anesthesia: Spinal, Epidural and Regional Blocks	Non-Essential	Non-Essential	1	1		Emergency
68	PB File	KEM	Hosp-2	Apr-19	Orthopedics	Ortho	2019-04-03		Rt BKA	Amputation		56	F	Block	Regional Anesthesia: Spinal, Epidural and Regional Blocks	Non-Essential	Non-Essential	1	1		Emergency
69	PB File	KEM	Hosp-2	Apr-19	Orthopedics	Ortho	2019-04-03		Left AKA	Amputation		48	F	SA	Regional Anesthesia: Spinal, Epidural and Regional Blocks	Non-Essential	Non-Essential	1	1		Emergency
70	PB File	KEM	Hosp-2	Apr-19	Orthopedics	Ortho	2019-04-04		Rt Foot BKA	Amputation		60	M	Spinal	Regional Anesthesia: Spinal, Epidural and Regional Blocks	Non-Essential	Non-Essential	1	1		Emergency
71	PB File	KEM	Hosp-2	Apr-19	Orthopedics	Ortho	2019-04-05		Left Leg BKA	Amputation		62	M	Spinal	Regional Anesthesia: Spinal, Epidural and Regional Blocks	Non-Essential	Non-Essential	1	1		Emergency
72	PB File	KEM	Hosp-2	Apr-19	Orthopedics	Ortho	2019-04-05		Rt Foot AKA and Left foot AKA	Amputation		67	F	GA	General Anaesthesia	Non-Essential	Non-Essential	1	1		Emergency
73	PB File	KEM	Hosp-2	Apr-19	Orthopedics	Ortho	2019-04-06		Left TMT amputation	Amputation		70	F	Spinal	Regional Anesthesia: Spinal, Epidural and Regional Blocks	Non-Essential	Non-Essential	1	1		Emergency
74	PB File	KEM	Hosp-2	Apr-19	Orthopedics	Ortho	2019-04-06		Left great toe rays Amputation	Amputation		51	M	LA	Local anesthesia not supplemented by sedation or GA	Non-Essential	Non-Essential	1	1		Emergency
75	PB File	KEM	Hosp-2	Apr-19	Orthopedics	Ortho	2019-04-06		Leg leg SOS BKA	Amputation		35	M	SA	Regional Anesthesia: Spinal, Epidural and Regional Blocks	Non-Essential	Non-Essential	1	1		Emergency
76	PB File	KEM	Hosp-2	Apr-19	General Surgery	GenSx	2019-04-07		Rt BK secondary suturing	Amputation		50	F	SA	Regional Anesthesia: Spinal, Epidural and Regional Blocks	Non-Essential	Non-Essential	1	1		Emergency
77	PB File	KEM	Hosp-2	Apr-19	Orthopedics	Ortho	2019-04-08		Left great toe amputation	Amputation		50	M	SA	Regional Anesthesia: Spinal, Epidural and Regional Blocks	Non-Essential	Non-Essential	1	1		Emergency
78	PB File	KEM	Hosp-2	Apr-19	Orthopedics	Ortho	2019-04-10		Debridement rt BK amputed stump and AK amputation done	Amputation		70	F	SA	Regional Anesthesia: Spinal, Epidural and Regional Blocks	Non-Essential	Non-Essential	1	1		Emergency
79	PB File	KEM	Hosp-2	Apr-19	Orthopedics	Ortho	2019-04-10		Revision of rt BK amputed stump and AK amputation done	Amputation		70	F	SA	Regional Anesthesia: Spinal, Epidural and Regional Blocks	Non-Essential	Non-Essential	1	1		Emergency
80	PB File	KEM	Hosp-2	Apr-19	Orthopedics	Ortho	2019-04-11		Ray's amputation BKA	Amputation		52	M	SA	Regional Anesthesia: Spinal, Epidural and Regional Blocks	Non-Essential	Non-Essential	1	1		Emergency
81	PB File	KEM	Hosp-2	Apr-19	Orthopedics	Ortho	2019-04-12		Left leg BKA	Amputation		80	F	GA	General Anaesthesia	Non-Essential	Non-Essential	1	1		Emergency
82	PB File	KEM	Hosp-2	Apr-19	Orthopedics	Ortho	2019-04-12		SOS BK of rt LL	amputation		60	M	SA	Regional Anesthesia: Spinal, Epidural and Regional Blocks	Non-Essential	Non-Essential	1	1		Emergency
83	PB File	KEM	Hosp-2	Apr-19	Orthopedics	Ortho	2019-04-12		Left foot BKA	Amputation		70	F	Spinal	Regional Anesthesia: Spinal, Epidural and Regional Blocks	Non-Essential	Non-Essential	1	1		Emergency
84	PB File	KEM	Hosp-2	Apr-19	Orthopedics	Ortho	2019-04-12		Rt foot BKA	Amputation		66	M	Spinal	Regional Anesthesia: Spinal, Epidural and Regional Blocks	Non-Essential	Non-Essential	1	1		Emergency
85	PB File	KEM	Hosp-2	Apr-19	Orthopedics	Ortho	2019-04-12		Rt Leg BKA	Amputation		72	M	XXXX Block	Regional Anesthesia: Spinal, Epidural and Regional Blocks	Non-Essential	Non-Essential	1	1		Emergency
86	PB File	KEM	Hosp-2	Apr-19	Orthopedics	Ortho	2019-04-13		Rays amputation of rt 4th toe	Amputation		58	M	Ankle block	Regional Anesthesia: Spinal, Epidural and Regional Blocks	Non-Essential	Non-Essential	1	1	Ankle block	Emergency
87	PB File	KEM	Hosp-2	Apr-19	Orthopedics	Ortho	2019-04-14		Left leg BKA	Amputation		50	M	SA	Regional Anesthesia: Spinal, Epidural and Regional Blocks	Non-Essential	Non-Essential	1	1		Emergency
88	PB File	KEM	Hosp-2	Apr-19	Orthopedics	Ortho	2019-04-14		rt EMT amputation	Amputation		55	M	LA	Local anesthesia not supplemented by sedation or GA	Non-Essential	Non-Essential	1	1		Emergency
89	PB File	KEM	Hosp-2	Apr-19	Orthopedics	Ortho	2019-04-15		Left BKA	Amputation		65	F	SA	Regional Anesthesia: Spinal, Epidural and Regional Blocks	Non-Essential	Non-Essential	1	1		Emergency
90	PB File	KEM	Hosp-2	Apr-19	Orthopedics	Ortho	2019-04-16		Left foot TMT left BKA	Amputation		63	F	SA	Regional Anesthesia: Spinal, Epidural and Regional Blocks	Non-Essential	Non-Essential	1	1		Emergency
91	PB File	KEM	Hosp-2	Apr-19	Orthopedics	Ortho	2019-04-16		Left 2nd toe Rays amputation	Amputation		60	F	Local	Local anesthesia not supplemented by sedation or GA	Non-Essential	Non-Essential	1	1		Emergency
92	PB File	KEM	Hosp-2	Apr-19	Orthopedics	Ortho	2019-04-16		Left 2nd toe obstruction SOS TMT amputation	Amputation		60	F	Local	Local anesthesia not supplemented by sedation or GA	Non-Essential	Non-Essential	1	1		Emergency
93	PB File	KEM	Hosp-2	Apr-19	Orthopedics	Ortho	2019-04-16		Left foot great toe Rays amputation SOS TMT	Amputation		65	F	Local	Local anesthesia not supplemented by sedation or GA	Non-Essential	Non-Essential	1	1		Emergency
94	PB File	KEM	Hosp-2	Apr-19	Orthopedics	Ortho	2019-04-18		Left BKA	Amputation		55	M	SA	Regional Anesthesia: Spinal, Epidural and Regional Blocks	Non-Essential	Non-Essential	1	1		Emergency
95	PB File	KEM	Hosp-2	Apr-19	Orthopedics	Ortho	2019-04-18		Rt little toe Rays amputation	Amputation		52	M	SA	Regional Anesthesia: Spinal, Epidural and Regional Blocks	Non-Essential	Non-Essential	1	1		Emergency
96	PB File	KEM	Hosp-2	Apr-19	Orthopedics	Ortho	2019-04-19		Debridement of left amputation stump	Amputation		58	F	Ankle block	Regional Anesthesia: Spinal, Epidural and Regional Blocks	Non-Essential	Non-Essential	1	1		Emergency
97	PB File	KEM	Hosp-2	Apr-19	Orthopedics	Ortho	2019-04-19		Left BKA and AKA	Amputation		74	F	SA	Regional Anesthesia: Spinal, Epidural and Regional Blocks	Non-Essential	Non-Essential	1	1		Emergency
98	PB File	KEM	Hosp-2	Apr-19	Orthopedics	Ortho	2019-04-19		Rt BKA and left rays amputation	Amputation		70	M	SA	Regional Anesthesia: Spinal, Epidural and Regional Blocks	Non-Essential	Non-Essential	1	1		Emergency
99	PB File	KEM	Hosp-2	Apr-19	Orthopedics	Ortho	2019-04-20		Rt foot TMT RT BKA	Amputation		36	M	LA	Local anesthesia not supplemented by sedation or GA	Non-Essential	Non-Essential	1	1		Emergency
100	PB File	KEM	Hosp-2	Apr-19	General Surgery	GenSx	2019-04-20		Rt foot BK surgery refasciotomy	Amputation		71	M	Spinal	Regional Anesthesia: Spinal, Epidural and Regional Blocks	Non-Essential	Non-Essential	1	1		Emergency
101	PB File	KEM	Hosp-2	Apr-19	Orthopedics	Ortho	2019-04-21		Debridement sos Amputation	Amputation		74	F	GA	General Anaesthesia	Non-Essential	Non-Essential	1	1		Emergency
102	PB File	KEM	Hosp-2	Apr-19	Orthopedics	Ortho	2019-04-21		Rt great toe amputation	Amputation		60	F	Ankle block	Regional Anesthesia: Spinal, Epidural and Regional Blocks	Non-Essential	Non-Essential	1	1		Emergency
103	PB File	KEM	Hosp-2	Apr-19	Orthopedics	Ortho	2019-04-23		Ray's amputation of rt foot	Amputation		55	M	Local	Local anesthesia not supplemented by sedation or GA	Non-Essential	Non-Essential	1	1		Emergency
104	PB File	KEM	Hosp-2	Apr-19	Orthopedics	Ortho	2019-04-23		SOS BKA	amputation		67	M	SA	Regional Anesthesia: Spinal, Epidural and Regional Blocks	Non-Essential	Non-Essential	1	1		Emergency
105	PB File	KEM	Hosp-2	Apr-19	Orhopedics	Ortho	2019-04-24		Rt BKA	Amputation		45	M	GA	General Anaesthesia	Non-Essential	Non-Essential	1	1		Emergency
106	PB File	KEM	Hosp-2	Apr-19	Orthopedics	Ortho	2019-04-25		Rt BKA	Amputation		66	M	Spinal	Regional Anesthesia: Spinal, Epidural and Regional Blocks	Non-Essential	Non-Essential	1	1		Emergency
107	PB File	KEM	Hosp-2	Apr-19	Orthopedics	Ortho	2019-04-26		Rt leg SOS BKA	amputation		60	F	SA	Regional Anesthesia: Spinal, Epidural and Regional Blocks	Non-Essential	Non-Essential	1	1		Emergency
108	PB File	KEM	Hosp-2	Apr-19	Orthopedics	Ortho	2019-04-27		LA amputation	Amputation		86	M	LA	Local anesthesia not supplemented by sedation or GA	Non-Essential	Non-Essential	1	1		Emergency
109	PB File	KEM	Hosp-2	Apr-19	Orthopedics	Ortho	2019-04-27		Rt Hand amputation	Amputation		999	999	LA	Local anesthesia not supplemented by sedation or GA	Non-Essential	Non-Essential	1	1		Emergency
110	PB File	KEM	Hosp-2	Apr-19	Orthopedics	Ortho	2019-04-28		Rt Leg BKA	amputation		62	M	SA	Regional Anesthesia: Spinal, Epidural and Regional Blocks	Non-Essential	Non-Essential	1	1		Emergency
111	PB File	KEM	Hosp-2	Apr-19	Orthopedics	Ortho	2019-04-28		BKA Left LL	Amputation		53	M	GA	General Anaesthesia	Non-Essential	Non-Essential	1	1		Emergency
112	PB File	KEM	Hosp-2	Apr-19	Orthopedics	Ortho	2019-04-29		Rt leg TMT Amputation	Amputation		71	M	Ankle block	Regional Anesthesia: Spinal, Epidural and Regional Blocks	Non-Essential	Non-Essential	1	1		Emergency
113	PB File	KEM	Hosp-2	Apr-19	Orthopedics	Ortho	2019-04-30		Rays Amputation of rt great toe	Amputation		52	M	LA	Local anesthesia not supplemented by sedation or GA	Non-Essential	Non-Essential	1	1		Emergency
114	PB File	KEM	Hosp-2	Apr-19	Orthopedics	Ortho	2019-04-30		Left AKA	Amputation		48	M	GA	General Anaesthesia	Non-Essential	Non-Essential	1	1		Emergency
118	PB File	KEM	Hosp-2	Apr-19	Ortho	Ortho	2019-03-31		Below knee $ amputation	Amputation		70	F	SAB with 25G quinckes needle	Regional Anesthesia: Spinal, Epidural and Regional Blocks	Non-Essential	Non-Essential	1	1		Emergency
119	PB File	KEM	Hosp-2	Apr-19	Ortho	Ortho	2019-04-06		Right Bk amputation IT $ deformity correction	Amputation		48	F	SAB with 25G quinckes spinal needle	Regional Anesthesia: Spinal, Epidural and Regional Blocks	Non-Essential	Non-Essential	1	1		Emergency
120	PB File	KEM	Hosp-2	Apr-19	Ortho	Ortho	2019-04-14		Left AKA	Amputation		70	F	SAB with 25G quinkes spinal needle	Regional Anesthesia: Spinal, Epidural and Regional Blocks	Non-Essential	Non-Essential	1	1		Emergency
121	PB File	KEM	Hosp-2	Apr-19	Ortho	Ortho	2019-04-25		Right BK amputation	Amputation		40	M	SAB with 25G quinkes needle	Regional Anesthesia: Spinal, Epidural and Regional Blocks	Non-Essential	Non-Essential	1	1		Emergency
122	PB File	KEM	Hosp-2	Apr-19	Ortho	Ortho	2019-04-27		Left Bk amputation	Amputation		39	M	SAB with 23G quinckes spinal needle	Regional Anesthesia: Spinal, Epidural and Regional Blocks	Non-Essential	Non-Essential	1	1		Emergency
123	PB File	KEM	Hosp-2	Apr-19	Ortho	Ortho	2019-04-08		Left lower limb amputation tibia $	Amputation		27	M	SA	Regional Anesthesia: Spinal, Epidural and Regional Blocks	Non-Essential	Non-Essential	1	1		Emergency
124	PB File	BARC	Hosp-1	Apr-19	Surgical	GenSx	22-04-2019		Amputation (non trauma)	Amputation		63	M	SA	Regional Anesthesia: Spinal, Epidural and Regional Blocks	Non-Essential	Non-Essential	1	1		Emergency
136	PB File	MAMC	Hosp-3	Apr-19	Gen.Surgery	GenSx	2019-04-04		Lap Appendectomy	Appendectomy		13	M		General Anaesthesia	Essential	Essential	1	1		Elective
137	PB File	MAMC	Hosp-3	Apr-19	Gen.Surgery	GenSx	2019-05-04		Lap Appendectomy	Appendectomy		30	F		General Anaesthesia	Essential	Essential	1	1		Elective
138	PB File	MAMC	Hosp-3	Apr-19	Surgery Em	GenSx	2019-08-04		Appendicular Abscess (Drainage)	Appendectomy		40	M		General Anaesthesia	Essential	Essential	1	1		Emergency
139	PB File	MAMC	Hosp-3	Apr-19	Surgery Em	GenSx	2019-09-04		Appendicectomy	Appendectomy		31	M		Regional Anesthesia: Spinal, Epidural and Regional Blocks	Essential	Essential	1	1		Emergency
141	PB File	MAMC	Hosp-3	Apr-19	Surgery Em	GenSx	2019-12-04		Appendicectomy	Appendectomy		31	M		Regional Anesthesia: Spinal, Epidural and Regional Blocks	Essential	Essential	1	1		Emergency
142	PB File	MAMC	Hosp-3	Apr-19	Surgery Em	GenSx	2019-12-04		Appendectomy	Appendectomy		40	M		Regional Anesthesia: Spinal, Epidural and Regional Blocks	Essential	Essential	1	1		Emergency
144	PB File	MAMC	Hosp-3	Apr-19	surgery Em	GenSx	2019-04-18		Appendectomy	Appendectomy		27	M		General Anaesthesia	Essential	Essential	1	1		Emergency
145	PB File	MAMC	Hosp-3	Apr-19	Surgery Em	GenSx	2019-04-21		Appendicectomy	Appendectomy		28	M		General Anaesthesia	Essential	Essential	1	1		Emergency
147	PB File	MAMC	Hosp-3	Apr-19	Surgery Em	GenSx	2019-04-26		Appendicectomy	Appendectomy		19	M		General Anaesthesia	Essential	Essential	1	1		Emergency
148	PB File	MAMC	Hosp-3	Apr-19	Surgery Em	GenSx	2019-04-26		Appendicectomy	Appendectomy		14	M		General Anaesthesia	Essential	Essential	1	1		Emergency
150	PB File	Terna	Hosp-5	Apr-19	General Surgery	GenSx	2019-02-04		OPEN APPENDICECTOMY FOR ACUTE APPENDICITIS	Appendectomy		999	M		Regional Anesthesia: Spinal, Epidural and Regional Blocks	Essential	Essential	1	1		Emergency
151	PB File	Terna	Hosp-5	Apr-19	General Surgery	GenSx	2019-03-04		LAPROSCOPIC APPENDICECTOMY FOR RECURRENT APPENDICITIS	Appendectomy		999	F		General Anaesthesia	Essential	Essential	1	1		Elective
152	PB File	Terna	Hosp-5	Apr-19	General Surgery	GenSx	17/04/2019		LAPAROSCOPIC APPENDISECTOMY	Appendectomy		999	F		General Anaesthesia	Essential	Essential	1	1		Emergency
157	PB File	KEM	Hosp-2	Apr-19	General Surgery	GenSx	2019-04-02		E open appendectomy	Appendectomy		22	M		Regional Anesthesia: Spinal, Epidural and Regional Blocks	Essential	Essential	1	1		Emergency
158	PB File	KEM	Hosp-2	Apr-19	General Surgery	GenSx	2019-04-02		E open appendectomy	Appendectomy		68	M		Regional Anesthesia: Spinal, Epidural and Regional Blocks	Essential	Essential	1	1		Emergency
159	PB File	KEM	Hosp-2	Apr-19	General Surgery	GenSx	2019-04-03		Emergency open Appendiectomy	Appendectomy		32	M		Regional Anesthesia: Spinal, Epidural and Regional Blocks	Essential	Essential	1	1		Emergency
160	PB File	KEM	Hosp-2	Apr-19	General Surgery	GenSx	2019-04-10		Emg appendicectomy	Appendectomy		27	F		Regional Anesthesia: Spinal, Epidural and Regional Blocks	Essential	Essential	1	1		Emergency
161	PB File	KEM	Hosp-2	Apr-19	General Surgery	GenSx	2019-04-12		Emg open appendectomy	Appendectomy		56	F		Regional Anesthesia: Spinal, Epidural and Regional Blocks	Essential	Essential	1	1		Emergency
162	PB File	KEM	Hosp-2	Apr-19	General Surgery	GenSx	2019-04-13		Emergency Appendiectomy	Appendectomy		28	M		Regional Anesthesia: Spinal, Epidural and Regional Blocks	Essential	Essential	1	1		Emergency
163	PB File	KEM	Hosp-2	Apr-19	General Surgery	GenSx	2019-04-15		Emergency open Appendiectomy	Appendectomy		25	M		General Anaesthesia	Essential	Essential	1	1		Emergency
164	PB File	KEM	Hosp-2	Apr-19	General Surgery	GenSx	2019-04-15		Open appendictomy	appendectomy		30	F		Regional Anesthesia: Spinal, Epidural and Regional Blocks	Essential	Essential	1	1		Emergency
165	PB File	KEM	Hosp-2	Apr-19	General Surgery	GenSx	2019-04-16		Open appendictomy	appendectomy		27	M		Regional Anesthesia: Spinal, Epidural and Regional Blocks	Essential	Essential	1	1		Emergency
166	PB File	KEM	Hosp-2	Apr-19	General Surgery	GenSx	2019-04-17		Emg open appendectomy	Appendectomy		23	M		Regional Anesthesia: Spinal, Epidural and Regional Blocks	Essential	Essential	1	1		Emergency
167	PB File	KEM	Hosp-2	Apr-19	General Surgery	GenSx	2019-04-19		Emg open appendectomy	Appendectomy		22	M		General Anaesthesia	Essential	Essential	1	1		Emergency
168	PB File	KEM	Hosp-2	Apr-19	General Surgery	GenSx	2019-04-20		Emg open appendectomy	Appendectomy		50	F		Regional Anesthesia: Spinal, Epidural and Regional Blocks	Essential	Essential	1	1		Emergency
169	PB File	KEM	Hosp-2	Apr-19	General Surgery	GenSx	2019-04-21		Emg appendicectomy	Appendectomy		23	F		Regional Anesthesia: Spinal, Epidural and Regional Blocks	Essential	Essential	1	1		Emergency
170	PB File	KEM	Hosp-2	Apr-19	General Surgery	GenSx	2019-04-22		Emg open appendectomy	Appendectomy		42	F		Regional Anesthesia: Spinal, Epidural and Regional Blocks	Essential	Essential	1	1		Emergency
171	PB File	KEM	Hosp-2	Apr-19	General Surgery	GenSx	2019-04-22		Emg open appendectomy	Appendectomy		52	M		Regional Anesthesia: Spinal, Epidural and Regional Blocks	Essential	Essential	1	1		Emergency
172	PB File	KEM	Hosp-2	Apr-19	General Surgery	GenSx	2019-04-23		Emg appendicectomy	Appendectomy		20	M		Regional Anesthesia: Spinal, Epidural and Regional Blocks	Essential	Essential	1	1		Emergency
173	PB File	KEM	Hosp-2	Apr-19	General Surgery	GenSx	2019-04-23		Emg open appendectomy	Appendectomy		59	M		Regional Anesthesia: Spinal, Epidural and Regional Blocks	Essential	Essential	1	1		Emergency
174	PB File	KEM	Hosp-2	Apr-19	General Surgery	GenSx	2019-04-23		Emg open appendectomy	Appendectomy		17	M		General Anaesthesia	Essential	Essential	1	1		Emergency
175	PB File	KEM	Hosp-2	Apr-19	General Surgery	GenSx	2019-04-23		Emg open appendectomy	Appendectomy		62	F		General Anaesthesia	Essential	Essential	1	1		Emergency
176	PB File	KEM	Hosp-2	Apr-19	General Surgery	GenSx	2019-04-25		Emg open appendectomy	Appendectomy		19	M		Regional Anesthesia: Spinal, Epidural and Regional Blocks	Essential	Essential	1	1		Emergency
177	PB File	KEM	Hosp-2	Apr-19	General Surgery	GenSx	2019-04-25		Emg exploration for appendix	Appendectomy		48	M		General Anaesthesia	Essential	Essential	1	1		Emergency
178	PB File	KEM	Hosp-2	Apr-19	General Surgery	GenSx	2019-04-25		Emg open appendectomy	Appendectomy		17	M		Regional Anesthesia: Spinal, Epidural and Regional Blocks	Essential	Essential	1	1		Emergency
179	PB File	KEM	Hosp-2	Apr-19	General Surgery	GenSx	2019-04-28		Emg open appendectomy	Appendectomy		40	M		Regional Anesthesia: Spinal, Epidural and Regional Blocks	Essential	Essential	1	1		Emergency
180	PB File	KEM	Hosp-2	Apr-19	General Surgery	GenSx	2019-04-27		Open appendictomy sos hemicolectomy sos Stoma	Appendectomy		28	M		Regional Anesthesia: Spinal, Epidural and Regional Blocks	Essential	Essential	1	1		Emergency
181	PB File	KEM	Hosp-2	Apr-19	General Surgery	GenSx	2019-04-27		Emg open appendectomy	Appendectomy		13	M		General Anaesthesia	Essential	Essential	1	1		Emergency
182	PB File	KEM	Hosp-2	Apr-19	General Surgery	GenSx	2019-04-30		Lap Appendectomy	Appendectomy		18	F		General Anaesthesia	Essential	Essential	1	1		Emergency
183	PB File	KEM	Hosp-2	Apr-19	General Surgery	GenSx	2019-04-16		Lap Appendicectomy	Appendectomy		27	999		General Anaesthesia	Essential	Essential	1	1		Emergency
184	PB File	KEM	Hosp-2	Apr-19	General Surgery	GenSx	2019-04-23		Lap Appendicectomy	Appendectomy		18	999		General Anaesthesia	Essential	Essential	1	1		Emergency
185	PB File	KEM	Hosp-2	Apr-19	General Surgery	GenSx	2019-04-02		Lap Appendicectomy	Appendectomy		28	999		General Anaesthesia	Essential	Essential	1	1		Emergency
186	PB File	KEM	Hosp-2	Apr-19	General Surgery	GenSx	2019-04-02		Lap Appendicectomy	Appendectomy		18	F		General Anaesthesia	Essential	Essential	1	1		Emergency
187	PB File	KEM	Hosp-2	Apr-19	General Surgery	GenSx	2019-04-02		Lap Appendicectomy	Appendectomy		30	F		General Anaesthesia	Essential	Essential	1	1		Emergency
188	PB File	BARC	Hosp-1	Apr-19	Surgical	GenSx	2019-10-04		Appendicectomy	Appendectomy		29	M		General Anaesthesia	Essential	Essential	1	1		Emergency
201	PB File	Manipal	Hosp-4	Apr-19	GeneraL surgery	GenSx	2019-12-04		Laparoscopic appendisectomy	Appendectomy		24	M		General Anaesthesia	Essential	Essential	1	1		Emergency
202	PB File	Manipal	Hosp-4	Apr-19	GeneraL surgery	GenSx	26/4/2019		Appendectomy	Appendectomy		65	M		General Anaesthesia	Essential	Essential	1	1		Emergency
248	PB File	MAMC	Hosp-3	Apr-19	Gyne Em	ObGy	2019-05-04		LSCS	Cesarean birth | Essential	Cesarean Section	31	F		Regional Anesthesia: Spinal, Epidural and Regional Blocks	Essential	Essential	1	1		Emergency
249	PB File	MAMC	Hosp-3	Apr-19	Gyne	ObGy	2019-05-04		LSCS	Cesarean birth | Essential	Cesarean Section	24	F		Regional Anesthesia: Spinal, Epidural and Regional Blocks	Essential	Essential	1	1		Emergency
250	PB File	MAMC	Hosp-3	Apr-19	Gyne	ObGy	2019-04-14		LSCS	Cesarean birth | Essential	Cesarean Section	26	F		Regional Anesthesia: Spinal, Epidural and Regional Blocks	Essential	Essential	1	1		Emergency
251	PB File	MAMC	Hosp-3	Apr-19	ANC	ObGy	2019-04-20		LSCS	Cesarean birth | Essential	Cesarean Section	24	F		Regional Anesthesia: Spinal, Epidural and Regional Blocks	Essential	Essential	1	1		Emergency
252	PB File	MAMC	Hosp-3	Apr-19	ANC	ObGy	2019-04-20		LSCS	Cesarean birth | Essential	Cesarean Section	26	F		Regional Anesthesia: Spinal, Epidural and Regional Blocks	Essential	Essential	1	1		Emergency
253	PB File	MAMC	Hosp-3	Apr-19	ANC	ObGy	2019-04-23		LSCS	Cesarean birth | Essential	Cesarean Section	27	F		Regional Anesthesia: Spinal, Epidural and Regional Blocks	Essential	Essential	1	1		Emergency
254	PB File	MAMC	Hosp-3	Apr-19	Gyne Em	ObGy	2019-04-26		LSCS	Cesarean birth | Essential	Cesarean Section	24	F		General Anaesthesia	Essential	Essential	1	1		Emergency
255	PB File	MAMC	Hosp-3	Apr-19	Gyne Em	ObGy	2019-04-26		LSCS	Cesarean birth | Essential	Cesarean Section	20	F		General Anaesthesia	Essential	Essential	1	1		Emergency
693	PB File	Terna	Hosp-5	Apr-19	Obstetrics & Gynaecology	ObGy	2019-02-04		EMERGENCY LSCS	Cesarean birth | Essential	Cesarean Section	999	F		Regional Anesthesia: Spinal, Epidural and Regional Blocks	Essential	Essential	1	1		Emergency
694	PB File	Terna	Hosp-5	Apr-19	Obstetrics & Gynaecology	ObGy	2019-03-04		EMERGENCY LSCS	Cesarean birth | Essential	Cesarean Section	999	F		Regional Anesthesia: Spinal, Epidural and Regional Blocks	Essential	Essential	1	1		Emergency
695	PB File	Terna	Hosp-5	Apr-19	Obstetrics & Gynaecology	ObGy	2019-05-04		EMERGENCY LSCS	Cesarean birth | Essential	Cesarean Section	999	F		Regional Anesthesia: Spinal, Epidural and Regional Blocks	Essential	Essential	1	1		Emergency
696	PB File	Terna	Hosp-5	Apr-19	Obstetrics & Gynaecology	ObGy	2019-12-04		EMERGENCY LSCS	Cesarean birth | Essential	Cesarean Section	999	F		Regional Anesthesia: Spinal, Epidural and Regional Blocks	Essential	Essential	1	1		Emergency
697	PB File	Terna	Hosp-5	Apr-19	Obstetrics & Gynaecology	ObGy	2019-12-04		EMERGENCY LSCS	Cesarean birth | Essential	Cesarean Section	999	F		Regional Anesthesia: Spinal, Epidural and Regional Blocks	Essential	Essential	1	1		Emergency
698	PB File	Terna	Hosp-5	Apr-19	Obstetrics & Gynaecology	ObGy	13/04/2019		ELECTIVE LSCS	Cesarean birth | Essential	Cesarean Section	999	F		Regional Anesthesia: Spinal, Epidural and Regional Blocks	Essential	Essential	1	1		Elective
699	PB File	Terna	Hosp-5	Apr-19	Obstetrics & Gynaecology	ObGy	14/04/2019		EMERGENCY LSCS	Cesarean birth | Essential	Cesarean Section	999	F		Regional Anesthesia: Spinal, Epidural and Regional Blocks	Essential	Essential	1	1		Emergency
700	PB File	Terna	Hosp-5	Apr-19	Obstetrics & Gynaecology	ObGy	17/04/2019		EMERGENCY LSCS	Cesarean birth | Essential	Cesarean Section	999	F		Regional Anesthesia: Spinal, Epidural and Regional Blocks	Essential	Essential	1	1		Emergency
701	PB File	Terna	Hosp-5	Apr-19	Obstetrics & Gynaecology	ObGy	19/04/2019		EMERGENCY L S C S	Cesarean birth | Essential	Cesarean Section	999	F		Regional Anesthesia: Spinal, Epidural and Regional Blocks	Essential	Essential	1	1		Emergency
702	PB File	Terna	Hosp-5	Apr-19	Obstetrics & Gynaecology	ObGy	20/04/2019		EMERGENCY LSCS	Cesarean birth | Essential	Cesarean Section	999	F		Regional Anesthesia: Spinal, Epidural and Regional Blocks	Essential	Essential	1	1		Elective
703	PB File	Terna	Hosp-5	Apr-19	Obstetrics & Gynaecology	ObGy	22/04/2019		EMERGENCY LSCS	Cesarean birth | Essential	Cesarean Section	999	F		Regional Anesthesia: Spinal, Epidural and Regional Blocks	Essential	Essential	1	1		Emergency
704	PB File	Terna	Hosp-5	Apr-19	Obstetrics & Gynaecology	ObGy	23/04/2019		EMERGENCY LSCS	Cesarean birth | Essential	Cesarean Section	999	F		Regional Anesthesia: Spinal, Epidural and Regional Blocks	Essential	Essential	1	1		Emergency
705	PB File	Terna	Hosp-5	Apr-19	Obstetrics & Gynaecology	ObGy	26/04/2019		ELECTIVE LSCS	Cesarean birth | Essential	Cesarean Section	999	F		Regional Anesthesia: Spinal, Epidural and Regional Blocks	Essential	Essential	1	1		Elective
706	PB File	Terna	Hosp-5	Apr-19	Obstetrics & Gynaecology	ObGy	26/04/2019		ELECTIVE LSCS	Cesarean birth | Essential	Cesarean Section	999	F		Regional Anesthesia: Spinal, Epidural and Regional Blocks	Essential	Essential	1	1		Elective
707	PB File	Terna	Hosp-5	Apr-19	Obstetrics & Gynaecology	ObGy	26/04/2019		EMERGENCY LSCS	Cesarean birth | Essential	Cesarean Section	999	F		Regional Anesthesia: Spinal, Epidural and Regional Blocks	Essential	Essential	1	1		Emergency
708	PB File	Terna	Hosp-5	Apr-19	General Surgery	GenSx	29/04/2019		INCISIONAL HERNIA POST LSCS	Cesarean birth | Essential	Cesarean Section	999	F		Regional Anesthesia: Spinal, Epidural and Regional Blocks	Essential	Essential	1	1		Elective
709	PB File	Terna	Hosp-5	Apr-19	Obstetrics & Gynaecology	ObGy	30/04/2019		ELECTIVE L S C S	Cesarean birth | Essential	Cesarean Section	999	F		Regional Anesthesia: Spinal, Epidural and Regional Blocks	Essential	Essential	1	1		Elective
725	PB File	KEM	Hosp-2	Apr-19	OBGY	ObGy	2019-04-04		Emg lower segment caeserian section	Cesarean birth | Essential	Cesarean Section	36	F		Regional Anesthesia: Spinal, Epidural and Regional Blocks	Essential	Essential	1	1		Emergency
726	PB File	KEM	Hosp-2	Apr-19	OBGY	ObGy	2019-04-04		Emg lower segment caeserian section	Cesarean birth | Essential	Cesarean Section	30	F		Regional Anesthesia: Spinal, Epidural and Regional Blocks	Essential	Essential	1	1		Emergency
727	PB File	KEM	Hosp-2	Apr-19	OBGY	ObGy	2019-04-04		Emg lower segment caeserian section	Cesarean birth | Essential	Cesarean Section	36	F		General Anaesthesia	Essential	Essential	1	1		Emergency
728	PB File	KEM	Hosp-2	Apr-19	OBGY	ObGy	2019-04-17		Emergency lower segement caserian section	Cesarean birth | Essential	Cesarean Section	24	F		Regional Anesthesia: Spinal, Epidural and Regional Blocks	Essential	Essential	1	1		Emergency
729	PB File	KEM	Hosp-2	Apr-19	OBGY	ObGy	2019-04-18		Emergency lower segement caserian section	Cesarean birth | Essential	Cesarean Section	22	F		Regional Anesthesia: Spinal, Epidural and Regional Blocks	Essential	Essential	1	1		Emergency
730	PB File	KEM	Hosp-2	Apr-19	OBGY	ObGy	2019-04-25		Emergency lower segement caserian section	Cesarean birth | Essential	Cesarean Section	24	F		Regional Anesthesia: Spinal, Epidural and Regional Blocks	Essential	Essential	1	1		Emergency
731	PB File	KEM	Hosp-2	Apr-19	OBGY	ObGy	2019-04-26		Emergency lower segement caserian section	Cesarean birth | Essential	Cesarean Section	24	F		Regional Anesthesia: Spinal, Epidural and Regional Blocks	Essential	Essential	1	1		Emergency
732	PB File	KEM	Hosp-2	Apr-19	OBGY	ObGy	2019-04-29		Emergency lower segement caserian section	Cesarean birth | Essential	Cesarean Section	999	F		Regional Anesthesia: Spinal, Epidural and Regional Blocks	Essential	Essential	1	1		Emergency
733	PB File	KEM	Hosp-2	Apr-19	OBGY	ObGy	2019-04-29		Emergency lower segement caserian section	Cesarean birth | Essential	Cesarean Section	999	F		Regional Anesthesia: Spinal, Epidural and Regional Blocks	Essential	Essential	1	1		Emergency
734	PB File	KEM	Hosp-2	Apr-19	OBGY	ObGy	2019-04-01		Emergency lower segement caserian section	Cesarean birth | Essential	Cesarean Section	26	F		Regional Anesthesia: Spinal, Epidural and Regional Blocks	Essential	Essential	1	1		Emergency
735	PB File	KEM	Hosp-2	Apr-19	OBGY	ObGy	2019-04-01		Emergency lower segement caserian section	Cesarean birth | Essential	Cesarean Section	32	F		Regional Anesthesia: Spinal, Epidural and Regional Blocks	Essential	Essential	1	1		Emergency
736	PB File	KEM	Hosp-2	Apr-19	OBGY	ObGy	2019-04-01		Emergency lower segement caserian section	Cesarean birth | Essential	Cesarean Section	30	F		Regional Anesthesia: Spinal, Epidural and Regional Blocks	Essential	Essential	1	1		Emergency
737	PB File	KEM	Hosp-2	Apr-19	OBGY	ObGy	2019-04-01		Elective lower segement caserian section	Cesarean birth | Essential	Cesarean Section	28	F		Regional Anesthesia: Spinal, Epidural and Regional Blocks	Essential	Essential	1	1		Elective
738	PB File	KEM	Hosp-2	Apr-19	OBGY	ObGy	2019-04-01		Emergency XXXX	Cesarean birth | Essential	Cesarean Section	29	F		Not available	Essential	Essential	1	1		Emergency
739	PB File	KEM	Hosp-2	Apr-19	OBGY	ObGy	2019-04-02		Emergency lower segement caserian section	Cesarean birth | Essential	Cesarean Section	25	F		Regional Anesthesia: Spinal, Epidural and Regional Blocks	Essential	Essential	1	1		Emergency
740	PB File	KEM	Hosp-2	Apr-19	OBGY	ObGy	2019-04-02		Emergency lower segement caserian section	Cesarean birth | Essential	Cesarean Section	28	F		Not available	Essential	Essential	1	1		Emergency
741	PB File	KEM	Hosp-2	Apr-19	OBGY	ObGy	2019-04-02		Emergency lower segement caserian section	Cesarean birth | Essential	Cesarean Section	35	F		Regional Anesthesia: Spinal, Epidural and Regional Blocks	Essential	Essential	1	1		Emergency
742	PB File	KEM	Hosp-2	Apr-19	OBGY	ObGy	2019-04-02		Elective lower segement caserian section with B/L tubal ligation	Cesarean birth | Essential	Cesarean Section	25	F		Regional Anesthesia: Spinal, Epidural and Regional Blocks	Essential	Essential	1	1		Elective
743	PB File	KEM	Hosp-2	Apr-19	OBGY	ObGy	2019-04-02		Elective lower segement caserian section with B/l	Cesarean birth | Essential	Cesarean Section	20	F		Regional Anesthesia: Spinal, Epidural and Regional Blocks	Essential	Essential	1	1		Elective
744	PB File	KEM	Hosp-2	Apr-19	OBGY	ObGy	2019-04-02		Emergency lower segment caserian section	Cesarean birth | Essential	Cesarean Section	24	F		Regional Anesthesia: Spinal, Epidural and Regional Blocks	Essential	Essential	1	1		Emergency
745	PB File	KEM	Hosp-2	Apr-19	OBGY	ObGy	2019-04-02		Elective lower segment caserian section with inter cuterinexxx contraceptive dvice insertion	Cesarean birth | Essential	Cesarean Section	26	F		Regional Anesthesia: Spinal, Epidural and Regional Blocks	Essential	Essential	1	1		Elective
746	PB File	KEM	Hosp-2	Apr-19	OBGY	ObGy	2019-04-02		Emergency lower segment caserian section	Cesarean birth | Essential	Cesarean Section	22	F		Regional Anesthesia: Spinal, Epidural and Regional Blocks	Essential	Essential	1	1		Emergency
747	PB File	KEM	Hosp-2	Apr-19	OBGY	ObGy	2019-04-02		Emergency lower caserian section	Cesarean birth | Essential	Cesarean Section	999	F		Regional Anesthesia: Spinal, Epidural and Regional Blocks	Essential	Essential	1	1		Emergency
748	PB File	KEM	Hosp-2	Apr-19	OBGY	ObGy	2019-04-02		Emergency lower caserian section	Cesarean birth | Essential	Cesarean Section	999	F		Regional Anesthesia: Spinal, Epidural and Regional Blocks	Essential	Essential	1	1		Emergency
749	PB File	KEM	Hosp-2	Apr-19	OBGY	ObGy	2019-04-02		Emergency LSCS	Cesarean birth | Essential	Cesarean Section	24	F		Regional Anesthesia: Spinal, Epidural and Regional Blocks	Essential	Essential	1	1		Emergency
750	PB File	KEM	Hosp-2	Apr-19	OBGY	ObGy	2019-04-03		Emergency lower segment caserian section	Cesarean birth | Essential	Cesarean Section	24	F		Regional Anesthesia: Spinal, Epidural and Regional Blocks	Essential	Essential	1	1		Emergency
751	PB File	KEM	Hosp-2	Apr-19	OBGY	ObGy	2019-04-03		Emergency lower segment caserian section	Cesarean birth | Essential	Cesarean Section	34	F		Regional Anesthesia: Spinal, Epidural and Regional Blocks	Essential	Essential	1	1		Emergency
752	PB File	KEM	Hosp-2	Apr-19	OBGY	ObGy	2019-04-03		Emergency lower segment caserian section	Cesarean birth | Essential	Cesarean Section	33	F		General Anaesthesia	Essential	Essential	1	1		Emergency
753	PB File	KEM	Hosp-2	Apr-19	OBGY	ObGy	2019-04-03		Emergency lower segment caserian section	Cesarean birth | Essential	Cesarean Section	23	F		Regional Anesthesia: Spinal, Epidural and Regional Blocks	Essential	Essential	1	1		Emergency
754	PB File	KEM	Hosp-2	Apr-19	OBGY	ObGy	2019-04-04		Emergency lower segment caserian section	Cesarean birth | Essential	Cesarean Section	23	F		General Anaesthesia	Essential	Essential	1	1		Emergency
755	PB File	KEM	Hosp-2	Apr-19	OBGY	ObGy	2019-04-04		Emergency lower segment caserian section	Cesarean birth | Essential	Cesarean Section	29	F		Regional Anesthesia: Spinal, Epidural and Regional Blocks	Essential	Essential	1	1		Emergency
756	PB File	KEM	Hosp-2	Apr-19	OBGY	ObGy	2019-04-04		Emergency lower segment caserian section	Cesarean birth | Essential	Cesarean Section	24	F		Regional Anesthesia: Spinal, Epidural and Regional Blocks	Essential	Essential	1	1		Emergency
757	PB File	KEM	Hosp-2	Apr-19	OBGY	ObGy	2019-04-04		Emergency lower segment caserian section	Cesarean birth | Essential	Cesarean Section	22	F		Regional Anesthesia: Spinal, Epidural and Regional Blocks	Essential	Essential	1	1		Emergency
758	PB File	KEM	Hosp-2	Apr-19	OBGY	ObGy	2019-04-04		Emergency lower segment caserian section	Cesarean birth | Essential	Cesarean Section	32	F		Regional Anesthesia: Spinal, Epidural and Regional Blocks	Essential	Essential	1	1		Emergency
759	PB File	KEM	Hosp-2	Apr-19	OBGY	ObGy	2019-04-05		Emergency lower segment caserian section	Cesarean birth | Essential	Cesarean Section	25	F		Regional Anesthesia: Spinal, Epidural and Regional Blocks	Essential	Essential	1	1		Emergency
760	PB File	KEM	Hosp-2	Apr-19	OBGY	ObGy	2019-04-05		Emergency lower segment caserian section	Cesarean birth | Essential	Cesarean Section	30	F		Regional Anesthesia: Spinal, Epidural and Regional Blocks	Essential	Essential	1	1		Emergency
761	PB File	KEM	Hosp-2	Apr-19	OBGY	ObGy	2019-04-05		Emergency lower segment caserian section	Cesarean birth | Essential	Cesarean Section	30	F		Regional Anesthesia: Spinal, Epidural and Regional Blocks	Essential	Essential	1	1		Emergency
762	PB File	KEM	Hosp-2	Apr-19	OBGY	ObGy	2019-04-05		Emergency lower segment caserian section with B/L tubal ligation	Cesarean birth | Essential	Cesarean Section	28	F		Regional Anesthesia: Spinal, Epidural and Regional Blocks	Essential	Essential	1	1		Emergency
763	PB File	KEM	Hosp-2	Apr-19	OBGY	ObGy	2019-04-05		Emergency lower segment caserian section	Cesarean birth | Essential	Cesarean Section	999	F		Regional Anesthesia: Spinal, Epidural and Regional Blocks	Essential	Essential	1	1		Emergency
764	PB File	KEM	Hosp-2	Apr-19	OBGY	ObGy	2019-04-05		Emergency lower segment caserian section	Cesarean birth | Essential	Cesarean Section	999	F		Regional Anesthesia: Spinal, Epidural and Regional Blocks	Essential	Essential	1	1		Emergency
765	PB File	KEM	Hosp-2	Apr-19	OBGY	ObGy	2019-04-05		Elective lower segement caserian section	Cesarean birth | Essential	Cesarean Section	24	F		Regional Anesthesia: Spinal, Epidural and Regional Blocks	Essential	Essential	1	1		Elective
766	PB File	KEM	Hosp-2	Apr-19	OBGY	ObGy	2019-04-05		Elective lower segement caserian section	Cesarean birth | Essential	Cesarean Section	25	F		Regional Anesthesia: Spinal, Epidural and Regional Blocks	Essential	Essential	1	1		Elective
767	PB File	KEM	Hosp-2	Apr-19	OBGY	ObGy	2019-04-05		Emergency lower segment caserian section	Cesarean birth | Essential	Cesarean Section	28	F		Regional Anesthesia: Spinal, Epidural and Regional Blocks	Essential	Essential	1	1		Emergency
768	PB File	KEM	Hosp-2	Apr-19	OBGY	ObGy	2019-04-05		Emergency lower segment caserian section	Cesarean birth | Essential	Cesarean Section	23	F		Regional Anesthesia: Spinal, Epidural and Regional Blocks	Essential	Essential	1	1		Emergency
769	PB File	KEM	Hosp-2	Apr-19	OBGY	ObGy	2019-04-05		Emergency lower segment caserian section	Cesarean birth | Essential	Cesarean Section	24	F		Regional Anesthesia: Spinal, Epidural and Regional Blocks	Essential	Essential	1	1		Emergency
770	PB File	KEM	Hosp-2	Apr-19	OBGY	ObGy	2019-04-05		Emergency lower segment caserian section	Cesarean birth | Essential	Cesarean Section	22	F		Regional Anesthesia: Spinal, Epidural and Regional Blocks	Essential	Essential	1	1		Emergency
771	PB File	KEM	Hosp-2	Apr-19	OBGY	ObGy	2019-04-05		Emergency lower segment caserian section	Cesarean birth | Essential	Cesarean Section	27	F		Regional Anesthesia: Spinal, Epidural and Regional Blocks	Essential	Essential	1	1		Emergency
772	PB File	KEM	Hosp-2	Apr-19	OBGY	ObGy	2019-04-06		Emergency lower segment caserian section	Cesarean birth | Essential	Cesarean Section	21	F		General Anaesthesia	Essential	Essential	1	1		Emergency
773	PB File	KEM	Hosp-2	Apr-19	OBGY	ObGy	2019-04-06		Emergency lower segment caserian section	Cesarean birth | Essential	Cesarean Section	20	F		Regional Anesthesia: Spinal, Epidural and Regional Blocks	Essential	Essential	1	1		Emergency
774	PB File	KEM	Hosp-2	Apr-19	OBGY	ObGy	2019-04-06		Emergency lower segment caserian section	Cesarean birth | Essential	Cesarean Section	29	F		Regional Anesthesia: Spinal, Epidural and Regional Blocks	Essential	Essential	1	1		Emergency
775	PB File	KEM	Hosp-2	Apr-19	OBGY	ObGy	2019-04-06		Emergency lower segment caserian section	Cesarean birth | Essential	Cesarean Section	23	F		Regional Anesthesia: Spinal, Epidural and Regional Blocks	Essential	Essential	1	1		Emergency
776	PB File	KEM	Hosp-2	Apr-19	OBGY	ObGy	2019-04-06		Emergency lower segment caserian section	Cesarean birth | Essential	Cesarean Section	22	F		Regional Anesthesia: Spinal, Epidural and Regional Blocks	Essential	Essential	1	1		Emergency
777	PB File	KEM	Hosp-2	Apr-19	OBGY	ObGy	2019-04-06		Emergency lower segment caserian section	Cesarean birth | Essential	Cesarean Section	22	F		Regional Anesthesia: Spinal, Epidural and Regional Blocks	Essential	Essential	1	1		Emergency
778	PB File	KEM	Hosp-2	Apr-19	OBGY	ObGy	2019-04-07		Emergency lower segment caserian section	Cesarean birth | Essential	Cesarean Section	30	F		Regional Anesthesia: Spinal, Epidural and Regional Blocks	Essential	Essential	1	1		Emergency
779	PB File	KEM	Hosp-2	Apr-19	OBGY	ObGy	2019-04-07		Emergency lower segment caserian section	Cesarean birth | Essential	Cesarean Section	33	F		Not available	Essential	Essential	1	1		Emergency
780	PB File	KEM	Hosp-2	Apr-19	OBGY	ObGy	2019-04-07		Emergency lower segment caserian section	Cesarean birth | Essential	Cesarean Section	28	F		Not available	Essential	Essential	1	1		Emergency
781	PB File	KEM	Hosp-2	Apr-19	OBGY	ObGy	2019-04-07		Emergency lower segment caserian section	Cesarean birth | Essential	Cesarean Section	34	F		Not available	Essential	Essential	1	1		Emergency
782	PB File	KEM	Hosp-2	Apr-19	OBGY	ObGy	2019-04-07		Emergency lower segment caserian section	Cesarean birth | Essential	Cesarean Section	22	F		Not available	Essential	Essential	1	1		Emergency
783	PB File	KEM	Hosp-2	Apr-19	OBGY	ObGy	2019-04-07		Emergency lower segment caserian section	Cesarean birth | Essential	Cesarean Section	23	F		Not available	Essential	Essential	1	1		Emergency
784	PB File	KEM	Hosp-2	Apr-19	OBGY	ObGy	2019-04-07		Emergency lower segment caserian section	Cesarean birth | Essential	Cesarean Section	24	F		Regional Anesthesia: Spinal, Epidural and Regional Blocks	Essential	Essential	1	1		Emergency
785	PB File	KEM	Hosp-2	Apr-19	OBGY	ObGy	2019-04-07		Emergency lower segment caserian section	Cesarean birth | Essential	Cesarean Section	24	F		Regional Anesthesia: Spinal, Epidural and Regional Blocks	Essential	Essential	1	1		Emergency
786	PB File	KEM	Hosp-2	Apr-19	OBGY	ObGy	2019-04-08		Emergency lower segment caserian section with b/l tubal ligation	Cesarean birth | Essential	Cesarean Section	29	F		Regional Anesthesia: Spinal, Epidural and Regional Blocks	Essential	Essential	1	1		Emergency
787	PB File	KEM	Hosp-2	Apr-19	OBGY	ObGy	2019-04-08		Emergency lower segment caserian section	Cesarean birth | Essential	Cesarean Section	30	F		Regional Anesthesia: Spinal, Epidural and Regional Blocks	Essential	Essential	1	1		Emergency
788	PB File	KEM	Hosp-2	Apr-19	OBGY	ObGy	2019-04-08		Emergency lower segment caserian section	Cesarean birth | Essential	Cesarean Section	29	F		Regional Anesthesia: Spinal, Epidural and Regional Blocks	Essential	Essential	1	1		Emergency
789	PB File	KEM	Hosp-2	Apr-19	OBGY	ObGy	2019-04-08		Emergency lower segment caserian section	Cesarean birth | Essential	Cesarean Section	26	F		Regional Anesthesia: Spinal, Epidural and Regional Blocks	Essential	Essential	1	1		Emergency
790	PB File	KEM	Hosp-2	Apr-19	OBGY	ObGy	2019-04-08		Emergency lower segment caserian section	Cesarean birth | Essential	Cesarean Section	24	F		Regional Anesthesia: Spinal, Epidural and Regional Blocks	Essential	Essential	1	1		Emergency
791	PB File	KEM	Hosp-2	Apr-19	OBGY	ObGy	2019-04-08		Emergency lower segment caserian section	Cesarean birth | Essential	Cesarean Section	26	F		Regional Anesthesia: Spinal, Epidural and Regional Blocks	Essential	Essential	1	1		Emergency
792	PB File	KEM	Hosp-2	Apr-19	OBGY	ObGy	2019-04-08		Emergency lower segment caserian section	Cesarean birth | Essential	Cesarean Section	35	F		Regional Anesthesia: Spinal, Epidural and Regional Blocks	Essential	Essential	1	1		Emergency
793	PB File	KEM	Hosp-2	Apr-19	OBGY	ObGy	2019-04-08		Emergency lower segment caserian section	Cesarean birth | Essential	Cesarean Section	32	F		Regional Anesthesia: Spinal, Epidural and Regional Blocks	Essential	Essential	1	1		Emergency
794	PB File	KEM	Hosp-2	Apr-19	OBGY	ObGy	2019-04-09		Emergency lower segment caserian section	Cesarean birth | Essential	Cesarean Section	27	F		Regional Anesthesia: Spinal, Epidural and Regional Blocks	Essential	Essential	1	1		Emergency
795	PB File	KEM	Hosp-2	Apr-19	OBGY	ObGy	2019-04-09		Emergency lower segment caserian section	Cesarean birth | Essential	Cesarean Section	27	F		Regional Anesthesia: Spinal, Epidural and Regional Blocks	Essential	Essential	1	1		Emergency
796	PB File	KEM	Hosp-2	Apr-19	OBGY	ObGy	2019-04-09		Emergency lower segment caserian section	Cesarean birth | Essential	Cesarean Section	33	F		Regional Anesthesia: Spinal, Epidural and Regional Blocks	Essential	Essential	1	1		Emergency
797	PB File	KEM	Hosp-2	Apr-19	OBGY	ObGy	2019-04-09		Emergency lower segment caserian section	Cesarean birth | Essential	Cesarean Section	26	F		Regional Anesthesia: Spinal, Epidural and Regional Blocks	Essential	Essential	1	1		Emergency
798	PB File	KEM	Hosp-2	Apr-19	OBGY	ObGy	2019-04-09		Elective Emergency lower segment caserian section with B/L tubal ligation	Cesarean birth | Essential	Cesarean Section	33	F		Regional Anesthesia: Spinal, Epidural and Regional Blocks	Essential	Essential	1	1		Elective
799	PB File	KEM	Hosp-2	Apr-19	OBGY	ObGy	2019-04-09		Elective Emergency lower segment caserian section with B/L tubal ligation	Cesarean birth | Essential	Cesarean Section	32	F		Regional Anesthesia: Spinal, Epidural and Regional Blocks	Essential	Essential	1	1		Elective
800	PB File	KEM	Hosp-2	Apr-19	OBGY	ObGy	2019-04-09		Emergency lower segment caserian section	Cesarean birth | Essential	Cesarean Section	20	F		Regional Anesthesia: Spinal, Epidural and Regional Blocks	Essential	Essential	1	1		Emergency
801	PB File	KEM	Hosp-2	Apr-19	OBGY	ObGy	2019-04-09		Emergency lower segment caserian section	Cesarean birth | Essential	Cesarean Section	32	F		Regional Anesthesia: Spinal, Epidural and Regional Blocks	Essential	Essential	1	1		Emergency
802	PB File	KEM	Hosp-2	Apr-19	OBGY	ObGy	2019-04-09		Emergency lower segment caserian section	Cesarean birth | Essential	Cesarean Section	28	F		Regional Anesthesia: Spinal, Epidural and Regional Blocks	Essential	Essential	1	1		Emergency
803	PB File	KEM	Hosp-2	Apr-19	OBGY	ObGy	2019-04-09		Emergency lower segment caserian section with b/l tubal ligation	Cesarean birth | Essential	Cesarean Section	36	F		Regional Anesthesia: Spinal, Epidural and Regional Blocks	Essential	Essential	1	1		Emergency
804	PB File	KEM	Hosp-2	Apr-19	OBGY	ObGy	2019-04-09		Emergency lower segment caserian section	Cesarean birth | Essential	Cesarean Section	22	F		Regional Anesthesia: Spinal, Epidural and Regional Blocks	Essential	Essential	1	1		Emergency
805	PB File	KEM	Hosp-2	Apr-19	OBGY	ObGy	2019-04-09		Emergency lower segment caserian section	Cesarean birth | Essential	Cesarean Section	24	F		Regional Anesthesia: Spinal, Epidural and Regional Blocks	Essential	Essential	1	1		Emergency
806	PB File	KEM	Hosp-2	Apr-19	OBGY	ObGy	2019-04-09		Emergency lower segment caserian section with b/l tubal ligation	Cesarean birth | Essential	Cesarean Section	31	F		Regional Anesthesia: Spinal, Epidural and Regional Blocks	Essential	Essential	1	1		Emergency
807	PB File	KEM	Hosp-2	Apr-19	OBGY	ObGy	2019-04-10		Emergency lower segment caserian section	Cesarean birth | Essential	Cesarean Section	26	F		Regional Anesthesia: Spinal, Epidural and Regional Blocks	Essential	Essential	1	1		Emergency
808	PB File	KEM	Hosp-2	Apr-19	OBGY	ObGy	2019-04-10		Emergency lower segment caserian section	Cesarean birth | Essential	Cesarean Section	35	F		Regional Anesthesia: Spinal, Epidural and Regional Blocks	Essential	Essential	1	1		Emergency
809	PB File	KEM	Hosp-2	Apr-19	OBGY	ObGy	2019-04-10		Elective lower segment caserian section with b/l tubal ligation	Cesarean birth | Essential	Cesarean Section	29	F		Regional Anesthesia: Spinal, Epidural and Regional Blocks	Essential	Essential	1	1		Elective
810	PB File	KEM	Hosp-2	Apr-19	OBGY	ObGy	2019-04-10		Emergency lower segment caserian section	Cesarean birth | Essential	Cesarean Section	23	F		Regional Anesthesia: Spinal, Epidural and Regional Blocks	Essential	Essential	1	1		Emergency
811	PB File	KEM	Hosp-2	Apr-19	OBGY	ObGy	2019-04-10		Emergency lower segment caserian section	Cesarean birth | Essential	Cesarean Section	26	F		Regional Anesthesia: Spinal, Epidural and Regional Blocks	Essential	Essential	1	1		Emergency
812	PB File	KEM	Hosp-2	Apr-19	OBGY	ObGy	2019-04-10		Emergency lower segment caserian section with b/l tubal ligation	Cesarean birth | Essential	Cesarean Section	999	F		Regional Anesthesia: Spinal, Epidural and Regional Blocks	Essential	Essential	1	1		Emergency
813	PB File	KEM	Hosp-2	Apr-19	OBGY	ObGy	2019-04-10		Emergency lower segment caserian section	Cesarean birth | Essential	Cesarean Section	26	F		Regional Anesthesia: Spinal, Epidural and Regional Blocks	Essential	Essential	1	1		Emergency
814	PB File	KEM	Hosp-2	Apr-19	OBGY	ObGy	2019-04-10		Emergency lower segment caserian section	Cesarean birth | Essential	Cesarean Section	25	F		Regional Anesthesia: Spinal, Epidural and Regional Blocks	Essential	Essential	1	1		Emergency
815	PB File	KEM	Hosp-2	Apr-19	OBGY	ObGy	2019-04-10		Emergency lower segment caserian section	Cesarean birth | Essential	Cesarean Section	34	F		Regional Anesthesia: Spinal, Epidural and Regional Blocks	Essential	Essential	1	1		Emergency
816	PB File	KEM	Hosp-2	Apr-19	OBGY	ObGy	2019-04-10		Emergency lower segment caserian section with b/l tubal ligation	Cesarean birth | Essential	Cesarean Section	27	F		Regional Anesthesia: Spinal, Epidural and Regional Blocks	Essential	Essential	1	1		Emergency
817	PB File	KEM	Hosp-2	Apr-19	OBGY	ObGy	2019-04-11		Emergency lower segment caserian section	Cesarean birth | Essential	Cesarean Section	18	F		Regional Anesthesia: Spinal, Epidural and Regional Blocks	Essential	Essential	1	1		Emergency
818	PB File	KEM	Hosp-2	Apr-19	OBGY	ObGy	2019-04-11		Emergency lower segment caserian section	Cesarean birth | Essential	Cesarean Section	21	F		Regional Anesthesia: Spinal, Epidural and Regional Blocks	Essential	Essential	1	1		Emergency
819	PB File	KEM	Hosp-2	Apr-19	OBGY	ObGy	2019-04-11		Emergency lower segment caserian section	Cesarean birth | Essential	Cesarean Section	30	F		Regional Anesthesia: Spinal, Epidural and Regional Blocks	Essential	Essential	1	1		Emergency
820	PB File	KEM	Hosp-2	Apr-19	OBGY	ObGy	2019-04-11		Emergency lower segment caserian section	Cesarean birth | Essential	Cesarean Section	23	F		Regional Anesthesia: Spinal, Epidural and Regional Blocks	Essential	Essential	1	1		Emergency
821	PB File	KEM	Hosp-2	Apr-19	OBGY	ObGy	2019-04-11		Emergency lower segment caserian section	Cesarean birth | Essential	Cesarean Section	25	F		Regional Anesthesia: Spinal, Epidural and Regional Blocks	Essential	Essential	1	1		Emergency
822	PB File	KEM	Hosp-2	Apr-19	OBGY	ObGy	2019-04-12		Emergency lower segment caserian section with b/l tubal ligation	Cesarean birth | Essential	Cesarean Section	29	F		Regional Anesthesia: Spinal, Epidural and Regional Blocks	Essential	Essential	1	1		Emergency
823	PB File	KEM	Hosp-2	Apr-19	OBGY	ObGy	2019-04-12		Emergency lower segment caserian section	Cesarean birth | Essential	Cesarean Section	28	F		Regional Anesthesia: Spinal, Epidural and Regional Blocks	Essential	Essential	1	1		Emergency
824	PB File	KEM	Hosp-2	Apr-19	OBGY	ObGy	2019-04-12		Emergency lower segment caserian section	Cesarean birth | Essential	Cesarean Section	35	F		Regional Anesthesia: Spinal, Epidural and Regional Blocks	Essential	Essential	1	1		Emergency
825	PB File	KEM	Hosp-2	Apr-19	OBGY	ObGy	2019-04-12		Previous lower segment caserian section not with for vaginal birth after caserian couple want Nermen method of XXXXX	Cesarean birth | Essential	Cesarean Section	38	F		Regional Anesthesia: Spinal, Epidural and Regional Blocks	Essential	Essential	1	1		Emergency
826	PB File	KEM	Hosp-2	Apr-19	OBGY	ObGy	2019-04-12		Emergency lower segment caserian section	Cesarean birth | Essential	Cesarean Section	25	F		Regional Anesthesia: Spinal, Epidural and Regional Blocks	Essential	Essential	1	1		Emergency
827	PB File	KEM	Hosp-2	Apr-19	OBGY	ObGy	2019-04-12		Emergency lower segment caserian section	Cesarean birth | Essential	Cesarean Section	30	F		Regional Anesthesia: Spinal, Epidural and Regional Blocks	Essential	Essential	1	1		Emergency
828	PB File	KEM	Hosp-2	Apr-19	OBGY	ObGy	2019-04-12		Emergency lower segment caserian section	Cesarean birth | Essential	Cesarean Section	27	F		Regional Anesthesia: Spinal, Epidural and Regional Blocks	Essential	Essential	1	1		Emergency
829	PB File	KEM	Hosp-2	Apr-19	OBGY	ObGy	2019-04-12		Emergency lower segment caserian section	Cesarean birth | Essential	Cesarean Section	29	F		Regional Anesthesia: Spinal, Epidural and Regional Blocks	Essential	Essential	1	1		Emergency
830	PB File	KEM	Hosp-2	Apr-19	OBGY	ObGy	2019-04-12		Emergency lower segment caserian section	Cesarean birth | Essential	Cesarean Section	30	F		Regional Anesthesia: Spinal, Epidural and Regional Blocks	Essential	Essential	1	1		Emergency
831	PB File	KEM	Hosp-2	Apr-19	OBGY	ObGy	2019-04-12		Emergency lower segment caserian section	Cesarean birth | Essential	Cesarean Section	27	F		Regional Anesthesia: Spinal, Epidural and Regional Blocks	Essential	Essential	1	1		Emergency
832	PB File	KEM	Hosp-2	Apr-19	OBGY	ObGy	2019-04-12		Emergency lower segment caserian section	Cesarean birth | Essential	Cesarean Section	29	F		Regional Anesthesia: Spinal, Epidural and Regional Blocks	Essential	Essential	1	1		Emergency
833	PB File	KEM	Hosp-2	Apr-19	OBGY	ObGy	2019-04-12		Emergency lower segment caserian section	Cesarean birth | Essential	Cesarean Section	24	F		Regional Anesthesia: Spinal, Epidural and Regional Blocks	Essential	Essential	1	1		Emergency
834	PB File	KEM	Hosp-2	Apr-19	OBGY	ObGy	2019-04-12		Emergency lower segment caserian section	Cesarean birth | Essential	Cesarean Section	25	F		Regional Anesthesia: Spinal, Epidural and Regional Blocks	Essential	Essential	1	1		Emergency
835	PB File	KEM	Hosp-2	Apr-19	OBGY	ObGy	2019-04-12		Emergency lower segment caserian section	Cesarean birth | Essential	Cesarean Section	26	F		Regional Anesthesia: Spinal, Epidural and Regional Blocks	Essential	Essential	1	1		Emergency
836	PB File	KEM	Hosp-2	Apr-19	OBGY	ObGy	2019-04-12		Emergency lower segment caserian section	Cesarean birth | Essential	Cesarean Section	24	F		Regional Anesthesia: Spinal, Epidural and Regional Blocks	Essential	Essential	1	1		Emergency
837	PB File	KEM	Hosp-2	Apr-19	OBGY	ObGy	2019-04-12		Emergency lower segment caserian section with b/l tubal ligation	Cesarean birth | Essential	Cesarean Section	31	F		Regional Anesthesia: Spinal, Epidural and Regional Blocks	Essential	Essential	1	1		Emergency
838	PB File	KEM	Hosp-2	Apr-19	OBGY	ObGy	2019-04-13		Emergency lower segment caserian section	Cesarean birth | Essential	Cesarean Section	26	F		Regional Anesthesia: Spinal, Epidural and Regional Blocks	Essential	Essential	1	1		Emergency
839	PB File	KEM	Hosp-2	Apr-19	OBGY	ObGy	2019-04-13		Emergency lower segment caserian section	Cesarean birth | Essential	Cesarean Section	31	F		Regional Anesthesia: Spinal, Epidural and Regional Blocks	Essential	Essential	1	1		Emergency
840	PB File	KEM	Hosp-2	Apr-19	OBGY	ObGy	2019-04-13		Emergency lower segment caserian section	Cesarean birth | Essential	Cesarean Section	32	F		Regional Anesthesia: Spinal, Epidural and Regional Blocks	Essential	Essential	1	1		Emergency
841	PB File	KEM	Hosp-2	Apr-19	OBGY	ObGy	2019-04-13		Emergency lower segment caserian section	Cesarean birth | Essential	Cesarean Section	30	F		General Anaesthesia	Essential	Essential	1	1		Emergency
842	PB File	KEM	Hosp-2	Apr-19	OBGY	ObGy	2019-04-13		Emergency lower segment caserian section	Cesarean birth | Essential	Cesarean Section	28	F		General Anaesthesia	Essential	Essential	1	1		Emergency
843	PB File	KEM	Hosp-2	Apr-19	OBGY	ObGy	2019-04-13		Emergency lower segment caserian section with b/l tubal ligation	Cesarean birth | Essential	Cesarean Section	30	F		Regional Anesthesia: Spinal, Epidural and Regional Blocks	Essential	Essential	1	1		Emergency
844	PB File	KEM	Hosp-2	Apr-19	OBGY	ObGy	2019-04-13		Emergency lower segment caserian section	Cesarean birth | Essential	Cesarean Section	24	F		Regional Anesthesia: Spinal, Epidural and Regional Blocks	Essential	Essential	1	1		Emergency
845	PB File	KEM	Hosp-2	Apr-19	OBGY	ObGy	2019-04-13		Emergency lower segment caserian section with b/l tubal ligation	Cesarean birth | Essential	Cesarean Section	31	F		General Anaesthesia	Essential	Essential	1	1		Emergency
846	PB File	KEM	Hosp-2	Apr-19	OBGY	ObGy	2019-04-13		Emergency lower segment caserian section with b/l uterine artery ligation	Cesarean birth | Essential	Cesarean Section	26	F		General Anaesthesia	Essential	Essential	1	1		Emergency
847	PB File	KEM	Hosp-2	Apr-19	OBGY	ObGy	2019-04-13		Emergency lower segment caserian section	Cesarean birth | Essential	Cesarean Section	24	F		Regional Anesthesia: Spinal, Epidural and Regional Blocks	Essential	Essential	1	1		Emergency
848	PB File	KEM	Hosp-2	Apr-19	OBGY	ObGy	2019-04-14		Emergency lower segment caserian section	Cesarean birth | Essential	Cesarean Section	38	F		Regional Anesthesia: Spinal, Epidural and Regional Blocks	Essential	Essential	1	1		Emergency
849	PB File	KEM	Hosp-2	Apr-19	OBGY	ObGy	2019-04-14		Emergency lower segment caserian section	Cesarean birth | Essential	Cesarean Section	23	F		Regional Anesthesia: Spinal, Epidural and Regional Blocks	Essential	Essential	1	1		Emergency
850	PB File	KEM	Hosp-2	Apr-19	OBGY	ObGy	2019-04-14		Emergency lower segment caserian section	Cesarean birth | Essential	Cesarean Section	23	F		Regional Anesthesia: Spinal, Epidural and Regional Blocks	Essential	Essential	1	1		Emergency
851	PB File	KEM	Hosp-2	Apr-19	OBGY	ObGy	2019-04-14		Emergency lower segment caserian section	Cesarean birth | Essential	Cesarean Section	30	F		Regional Anesthesia: Spinal, Epidural and Regional Blocks	Essential	Essential	1	1		Emergency
852	PB File	KEM	Hosp-2	Apr-19	OBGY	ObGy	2019-04-14		Emergency lower segment caserian section	Cesarean birth | Essential	Cesarean Section	24	F		Regional Anesthesia: Spinal, Epidural and Regional Blocks	Essential	Essential	1	1		Emergency
853	PB File	KEM	Hosp-2	Apr-19	OBGY	ObGy	2019-04-14		Emergency classical caserian section f/b obstretric hysterectomy with bladder rent repair	Cesarean birth | Essential	Cesarean Section	35	F		General Anaesthesia	Essential	Essential	1	1		Emergency
854	PB File	KEM	Hosp-2	Apr-19	OBGY	ObGy	2019-04-14		Emergency lower segment caserian section	Cesarean birth | Essential	Cesarean Section	24	F		Not available	Essential	Essential	1	1		Emergency
855	PB File	KEM	Hosp-2	Apr-19	OBGY	ObGy	2019-04-15		Emergency lower segment caserian section	Cesarean birth | Essential	Cesarean Section	21	F		Regional Anesthesia: Spinal, Epidural and Regional Blocks	Essential	Essential	1	1		Emergency
856	PB File	KEM	Hosp-2	Apr-19	OBGY	ObGy	2019-04-15		LSCS	Cesarean birth | Essential	Cesarean Section	21	F		Regional Anesthesia: Spinal, Epidural and Regional Blocks	Essential	Essential	1	1		Emergency
857	PB File	KEM	Hosp-2	Apr-19	OBGY	ObGy	2019-04-15		LSCS	Cesarean birth | Essential	Cesarean Section	22	F		Regional Anesthesia: Spinal, Epidural and Regional Blocks	Essential	Essential	1	1		Emergency
858	PB File	KEM	Hosp-2	Apr-19	OBGY	ObGy	2019-04-15		LSCS	Cesarean birth | Essential	Cesarean Section	37	F		Regional Anesthesia: Spinal, Epidural and Regional Blocks	Essential	Essential	1	1		Emergency
859	PB File	KEM	Hosp-2	Apr-19	OBGY	ObGy	2019-04-15		LSCS + TL	Cesarean birth | Essential	Cesarean Section	26	F		Regional Anesthesia: Spinal, Epidural and Regional Blocks	Essential	Essential	1	1		Elective
860	PB File	KEM	Hosp-2	Apr-19	OBGY	ObGy	2019-04-15		LSCS	Cesarean birth | Essential	Cesarean Section	27	F		Regional Anesthesia: Spinal, Epidural and Regional Blocks	Essential	Essential	1	1		Emergency
861	PB File	KEM	Hosp-2	Apr-19	OBGY	ObGy	2019-04-15		LSCS	Cesarean birth | Essential	Cesarean Section	29	F		Regional Anesthesia: Spinal, Epidural and Regional Blocks	Essential	Essential	1	1		Emergency
862	PB File	KEM	Hosp-2	Apr-19	OBGY	ObGy	2019-04-15		LSCS	Cesarean birth | Essential	Cesarean Section	24	F		Regional Anesthesia: Spinal, Epidural and Regional Blocks	Essential	Essential	1	1		Emergency
863	PB File	KEM	Hosp-2	Apr-19	OBGY	ObGy	2019-04-15		LSCS	Cesarean birth | Essential	Cesarean Section	23	F		Regional Anesthesia: Spinal, Epidural and Regional Blocks	Essential	Essential	1	1		Emergency
864	PB File	KEM	Hosp-2	Apr-19	OBGY	ObGy	2019-04-16		Emergency lower segment caserian section with b/l tubal ligation	Cesarean birth | Essential	Cesarean Section	34	F		Regional Anesthesia: Spinal, Epidural and Regional Blocks	Essential	Essential	1	1		Emergency
865	PB File	KEM	Hosp-2	Apr-19	OBGY	ObGy	2019-04-16		Emergency lower segment caserian section	Cesarean birth | Essential	Cesarean Section	27	F		Regional Anesthesia: Spinal, Epidural and Regional Blocks	Essential	Essential	1	1		Emergency
866	PB File	KEM	Hosp-2	Apr-19	OBGY	ObGy	2019-04-16		Emergency lower segment caserian section	Cesarean birth | Essential	Cesarean Section	30	F		Regional Anesthesia: Spinal, Epidural and Regional Blocks	Essential	Essential	1	1		Emergency
867	PB File	KEM	Hosp-2	Apr-19	OBGY	ObGy	2019-04-16		Emergency lower segment caserian section with b/l tubal ligation	Cesarean birth | Essential	Cesarean Section	30	F		Regional Anesthesia: Spinal, Epidural and Regional Blocks	Essential	Essential	1	1		Emergency
868	PB File	KEM	Hosp-2	Apr-19	OBGY	ObGy	2019-04-16		Emergency lower segment caserian section	Cesarean birth | Essential	Cesarean Section	24	F		Regional Anesthesia: Spinal, Epidural and Regional Blocks	Essential	Essential	1	1		Emergency
869	PB File	KEM	Hosp-2	Apr-19	OBGY	ObGy	2019-04-16		Emergency lower segment caserian section	Cesarean birth | Essential	Cesarean Section	27	F		Regional Anesthesia: Spinal, Epidural and Regional Blocks	Essential	Essential	1	1		Emergency
870	PB File	KEM	Hosp-2	Apr-19	OBGY	ObGy	2019-04-17		Emergency lower segment caserian section	Cesarean birth | Essential	Cesarean Section	19	F		Regional Anesthesia: Spinal, Epidural and Regional Blocks	Essential	Essential	1	1		Emergency
871	PB File	KEM	Hosp-2	Apr-19	OBGY	ObGy	2019-04-17		Elective LSCS	Cesarean birth | Essential	Cesarean Section	22	F		Regional Anesthesia: Spinal, Epidural and Regional Blocks	Essential	Essential	1	1		Elective
872	PB File	KEM	Hosp-2	Apr-19	OBGY	ObGy	2019-04-17		Elective LSCS	Cesarean birth | Essential	Cesarean Section	25	F		Regional Anesthesia: Spinal, Epidural and Regional Blocks	Essential	Essential	1	1		Elective
873	PB File	KEM	Hosp-2	Apr-19	OBGY	ObGy	2019-04-17		Emergency lower segment caserian section	Cesarean birth | Essential	Cesarean Section	30	F		Regional Anesthesia: Spinal, Epidural and Regional Blocks	Essential	Essential	1	1		Emergency
874	PB File	KEM	Hosp-2	Apr-19	OBGY	ObGy	2019-04-17		Emergency lower segment caserian section	Cesarean birth | Essential	Cesarean Section	26	F		Regional Anesthesia: Spinal, Epidural and Regional Blocks	Essential	Essential	1	1		Emergency
875	PB File	KEM	Hosp-2	Apr-19	OBGY	ObGy	2019-04-17		Emergency lower segment caserian section	Cesarean birth | Essential	Cesarean Section	30	F		Regional Anesthesia: Spinal, Epidural and Regional Blocks	Essential	Essential	1	1		Emergency
876	PB File	KEM	Hosp-2	Apr-19	OBGY	ObGy	2019-04-17		Emergency lower segment caserian section	Cesarean birth | Essential	Cesarean Section	37	F		Regional Anesthesia: Spinal, Epidural and Regional Blocks	Essential	Essential	1	1		Emergency
877	PB File	KEM	Hosp-2	Apr-19	OBGY	ObGy	2019-04-18		Emergency lower segment caserian section	Cesarean birth | Essential	Cesarean Section	24	F		Regional Anesthesia: Spinal, Epidural and Regional Blocks	Essential	Essential	1	1		Emergency
878	PB File	KEM	Hosp-2	Apr-19	OBGY	ObGy	2019-04-18		Emergency lower segment caserian section	Cesarean birth | Essential	Cesarean Section	32	F		Regional Anesthesia: Spinal, Epidural and Regional Blocks	Essential	Essential	1	1		Emergency
879	PB File	KEM	Hosp-2	Apr-19	OBGY	ObGy	2019-04-18		Emergency lower segment caserian section	Cesarean birth | Essential	Cesarean Section	25	F		Regional Anesthesia: Spinal, Epidural and Regional Blocks	Essential	Essential	1	1		Emergency
880	PB File	KEM	Hosp-2	Apr-19	OBGY	ObGy	2019-04-18		Emergency lower segment caserian section	Cesarean birth | Essential	Cesarean Section	24	F		Not available	Essential	Essential	1	1		Emergency
881	PB File	KEM	Hosp-2	Apr-19	OBGY	ObGy	2019-04-18		Elective LSCS with bilateral tubal ligation	Cesarean birth | Essential	Cesarean Section	26	F		Regional Anesthesia: Spinal, Epidural and Regional Blocks	Essential	Essential	1	1		Elective
882	PB File	KEM	Hosp-2	Apr-19	OBGY	ObGy	2019-04-18		Emergency LSCS	Cesarean birth | Essential	Cesarean Section	26	F		Regional Anesthesia: Spinal, Epidural and Regional Blocks	Essential	Essential	1	1		Emergency
883	PB File	KEM	Hosp-2	Apr-19	OBGY	ObGy	2019-04-18		Emergency LSCS	Cesarean birth | Essential	Cesarean Section	30	F		Regional Anesthesia: Spinal, Epidural and Regional Blocks	Essential	Essential	1	1		Emergency
884	PB File	KEM	Hosp-2	Apr-19	OBGY	ObGy	2019-04-18		Emergency LSCS	Cesarean birth | Essential	Cesarean Section	20	F		Regional Anesthesia: Spinal, Epidural and Regional Blocks	Essential	Essential	1	1		Emergency
885	PB File	KEM	Hosp-2	Apr-19	OBGY	ObGy	2019-04-18		Emergency LSCS	Cesarean birth | Essential	Cesarean Section	24	F		Regional Anesthesia: Spinal, Epidural and Regional Blocks	Essential	Essential	1	1		Emergency
886	PB File	KEM	Hosp-2	Apr-19	OBGY	ObGy	2019-04-18		Emergency LSCS	Cesarean birth | Essential	Cesarean Section	30	F		Regional Anesthesia: Spinal, Epidural and Regional Blocks	Essential	Essential	1	1		Emergency
887	PB File	KEM	Hosp-2	Apr-19	OBGY	ObGy	2019-04-19		Emergency LSCS	Cesarean birth | Essential	Cesarean Section	26	F		Regional Anesthesia: Spinal, Epidural and Regional Blocks	Essential	Essential	1	1		Emergency
888	PB File	KEM	Hosp-2	Apr-19	OBGY	ObGy	2019-04-19		Elective LSCS	Cesarean birth | Essential	Cesarean Section	22	F		Regional Anesthesia: Spinal, Epidural and Regional Blocks	Essential	Essential	1	1		Elective
889	PB File	KEM	Hosp-2	Apr-19	OBGY	ObGy	2019-04-19		Elective LSCS	Cesarean birth | Essential	Cesarean Section	24	F		Regional Anesthesia: Spinal, Epidural and Regional Blocks	Essential	Essential	1	1		Elective
890	PB File	KEM	Hosp-2	Apr-19	OBGY	ObGy	2019-04-19		Elective LSCS with bilateral tubal ligation	Cesarean birth | Essential	Cesarean Section	32	F		Regional Anesthesia: Spinal, Epidural and Regional Blocks	Essential	Essential	1	1		Elective
891	PB File	KEM	Hosp-2	Apr-19	OBGY	ObGy	2019-04-19		Emergency LSCS	Cesarean birth | Essential	Cesarean Section	35	F		Regional Anesthesia: Spinal, Epidural and Regional Blocks	Essential	Essential	1	1		Emergency
892	PB File	KEM	Hosp-2	Apr-19	OBGY	ObGy	2019-04-19		Elective LSCS	Cesarean birth | Essential	Cesarean Section	21	F		Regional Anesthesia: Spinal, Epidural and Regional Blocks	Essential	Essential	1	1		Elective
893	PB File	KEM	Hosp-2	Apr-19	OBGY	ObGy	2019-04-19		Elective LSCS	Cesarean birth | Essential	Cesarean Section	32	F		Regional Anesthesia: Spinal, Epidural and Regional Blocks	Essential	Essential	1	1		Elective
894	PB File	KEM	Hosp-2	Apr-19	OBGY	ObGy	2019-04-18		Emergency LSCS	Cesarean birth | Essential	Cesarean Section	23	F		General Anaesthesia	Essential	Essential	1	1		Emergency
895	PB File	KEM	Hosp-2	Apr-19	OBGY	ObGy	xx		Emergency LSCS	Cesarean birth | Essential	Cesarean Section	26	F		Regional Anesthesia: Spinal, Epidural and Regional Blocks	Essential	Essential	1	1		Emergency
896	PB File	KEM	Hosp-2	Apr-19	OBGY	ObGy	2019-04-19		Emergency LSCS	Cesarean birth | Essential	Cesarean Section	29	F		Regional Anesthesia: Spinal, Epidural and Regional Blocks	Essential	Essential	1	1		Emergency
897	PB File	KEM	Hosp-2	Apr-19	OBGY	ObGy	2019-04-19		Emergency LSCS	Cesarean birth | Essential	Cesarean Section	25	F		Regional Anesthesia: Spinal, Epidural and Regional Blocks	Essential	Essential	1	1		Emergency
898	PB File	KEM	Hosp-2	Apr-19	OBGY	ObGy	2019-04-19		Emergency LSCS	Cesarean birth | Essential	Cesarean Section	24	F		Regional Anesthesia: Spinal, Epidural and Regional Blocks	Essential	Essential	1	1		Emergency
899	PB File	KEM	Hosp-2	Apr-19	OBGY	ObGy	2019-04-19		Emergency LSCS	Cesarean birth | Essential	Cesarean Section	25	F		Regional Anesthesia: Spinal, Epidural and Regional Blocks	Essential	Essential	1	1		Emergency
900	PB File	KEM	Hosp-2	Apr-19	OBGY	ObGy	2019-04-20		Emergency LSCS with tubal ligation	Cesarean birth | Essential	Cesarean Section	30	F		Regional Anesthesia: Spinal, Epidural and Regional Blocks	Essential	Essential	1	1		Emergency
901	PB File	KEM	Hosp-2	Apr-19	OBGY	ObGy	2019-04-20		Emergency LSCS with tubal ligation	Cesarean birth | Essential	Cesarean Section	33	F		Regional Anesthesia: Spinal, Epidural and Regional Blocks	Essential	Essential	1	1		Emergency
902	PB File	KEM	Hosp-2	Apr-19	OBGY	ObGy	2019-04-20		Emergency LSCS	Cesarean birth | Essential	Cesarean Section	29	F		Regional Anesthesia: Spinal, Epidural and Regional Blocks	Essential	Essential	1	1		Emergency
903	PB File	KEM	Hosp-2	Apr-19	OBGY	ObGy	2019-04-20		Emergency LSCS with B/L tubal ligation	Cesarean birth | Essential	Cesarean Section	34	F		Regional Anesthesia: Spinal, Epidural and Regional Blocks	Essential	Essential	1	1		Emergency
904	PB File	KEM	Hosp-2	Apr-19	OBGY	ObGy	2019-04-20		Emergency LSCS	Cesarean birth | Essential	Cesarean Section	20	F		Regional Anesthesia: Spinal, Epidural and Regional Blocks	Essential	Essential	1	1		Emergency
905	PB File	KEM	Hosp-2	Apr-19	OBGY	ObGy	2019-04-20		Emergency LSCS	Cesarean birth | Essential	Cesarean Section	28	F		Regional Anesthesia: Spinal, Epidural and Regional Blocks	Essential	Essential	1	1		Emergency
906	PB File	KEM	Hosp-2	Apr-19	OBGY	ObGy	2019-04-20		Emergency LSCS with B/L tubal ligation	Cesarean birth | Essential	Cesarean Section	25	F		Regional Anesthesia: Spinal, Epidural and Regional Blocks	Essential	Essential	1	1		Emergency
907	PB File	KEM	Hosp-2	Apr-19	OBGY	ObGy	2019-04-21		Emergency LSCS	Cesarean birth | Essential	Cesarean Section	32	F		Regional Anesthesia: Spinal, Epidural and Regional Blocks	Essential	Essential	1	1		Emergency
908	PB File	KEM	Hosp-2	Apr-19	OBGY	ObGy	2019-04-21		Emergency LSCS	Cesarean birth | Essential	Cesarean Section	31	F		General Anaesthesia	Essential	Essential	1	1		Emergency
909	PB File	KEM	Hosp-2	Apr-19	OBGY	ObGy	2019-04-21		Emergency LSCS	Cesarean birth | Essential	Cesarean Section	24	F		Regional Anesthesia: Spinal, Epidural and Regional Blocks	Essential	Essential	1	1		Emergency
910	PB File	KEM	Hosp-2	Apr-19	OBGY	ObGy	2019-04-21		Emergency LSCS with B/L tubal ligation	Cesarean birth | Essential	Cesarean Section	25	F		Regional Anesthesia: Spinal, Epidural and Regional Blocks	Essential	Essential	1	1		Emergency
911	PB File	KEM	Hosp-2	Apr-19	OBGY	ObGy	2019-04-21		Emergency LSCS	Cesarean birth | Essential	Cesarean Section	25	F		Regional Anesthesia: Spinal, Epidural and Regional Blocks	Essential	Essential	1	1		Emergency
912	PB File	KEM	Hosp-2	Apr-19	OBGY	ObGy	2019-04-21		Emergency LSCS	Cesarean birth | Essential	Cesarean Section	20	F		Regional Anesthesia: Spinal, Epidural and Regional Blocks	Essential	Essential	1	1		Emergency
913	PB File	KEM	Hosp-2	Apr-19	OBGY	ObGy	2019-04-21		Emergency LSCS	Cesarean birth | Essential	Cesarean Section	21	F		General Anaesthesia	Essential	Essential	1	1		Emergency
914	PB File	KEM	Hosp-2	Apr-19	OBGY	ObGy	2019-04-21		Emergency LSCS	Cesarean birth | Essential	Cesarean Section	28	F		Regional Anesthesia: Spinal, Epidural and Regional Blocks	Essential	Essential	1	1		Emergency
915	PB File	KEM	Hosp-2	Apr-19	OBGY	ObGy	2019-04-21		Emergency LSCS	Cesarean birth | Essential	Cesarean Section	26	F		Not available	Essential	Essential	1	1		Emergency
916	PB File	KEM	Hosp-2	Apr-19	OBGY	ObGy	2019-04-21		Emergency LSCS	Cesarean birth | Essential	Cesarean Section	34	F		Not available	Essential	Essential	1	1		Emergency
917	PB File	KEM	Hosp-2	Apr-19	OBGY	ObGy	2019-04-21		Emergency LSCS with inspection of bowel with ovaran biopsy	Cesarean birth | Essential	Cesarean Section	30	F		General Anaesthesia	Essential	Essential	1	1		Emergency
918	PB File	KEM	Hosp-2	Apr-19	OBGY	ObGy	2019-04-21		Elective LSCS with tubal ligation	Cesarean birth | Essential	Cesarean Section	29	F		Regional Anesthesia: Spinal, Epidural and Regional Blocks	Essential	Essential	1	1		Elective
919	PB File	KEM	Hosp-2	Apr-19	OBGY	ObGy	2019-04-21		Elective LSCS	Cesarean birth | Essential	Cesarean Section	20	F		Regional Anesthesia: Spinal, Epidural and Regional Blocks	Essential	Essential	1	1		Elective
920	PB File	BARC	Hosp-1	Apr-19	Gynaec	ObGy	2019-02-04		Cesarean birth	Cesarean birth | Essential	Cesarean Section	33	F		Regional Anesthesia: Spinal, Epidural and Regional Blocks	Essential	Essential	1	1		Elective
921	PB File	BARC	Hosp-1	Apr-19	Gynaec	ObGy	2019-02-04		Cesarean birth	Cesarean birth | Essential	Cesarean Section	35	F		Regional Anesthesia: Spinal, Epidural and Regional Blocks	Essential	Essential	1	1		Elective
922	PB File	BARC	Hosp-1	Apr-19	Gynaec	ObGy	2019-04-04		Cesarean birth	Cesarean birth | Essential	Cesarean Section	33	F		Regional Anesthesia: Spinal, Epidural and Regional Blocks	Essential	Essential	1	1		Elective
923	PB File	BARC	Hosp-1	Apr-19	Gynaec	ObGy	2019-09-04		Cesarean birth	Cesarean birth | Essential	Cesarean Section	36	F		Regional Anesthesia: Spinal, Epidural and Regional Blocks	Essential	Essential	1	1		emergency
924	PB File	BARC	Hosp-1	Apr-19	Gynaec	ObGy	2019-10-04		Cesarean birth	Cesarean birth | Essential	Cesarean Section	27	F		Regional Anesthesia: Spinal, Epidural and Regional Blocks	Essential	Essential	1	1		emergency
925	PB File	BARC	Hosp-1	Apr-19	Gynaec	ObGy	2019-11-04		Cesarean birth	Cesarean birth | Essential	Cesarean Section	31	F		Regional Anesthesia: Spinal, Epidural and Regional Blocks	Essential	Essential	1	1		emergency
926	PB File	BARC	Hosp-1	Apr-19	Gynaec	ObGy	2019-11-04		Cesarean birth	Cesarean birth | Essential	Cesarean Section	32	F		Regional Anesthesia: Spinal, Epidural and Regional Blocks	Essential	Essential	1	1		Elective
927	PB File	BARC	Hosp-1	Apr-19	Gynaec	ObGy	2019-11-04		Cesarean birth	Cesarean birth | Essential	Cesarean Section	33	F		Regional Anesthesia: Spinal, Epidural and Regional Blocks	Essential	Essential	1	1		Elective
928	PB File	BARC	Hosp-1	Apr-19	Gynaec	ObGy	2019-11-04		Cesarean birth	Cesarean birth | Essential	Cesarean Section	30	F		Regional Anesthesia: Spinal, Epidural and Regional Blocks	Essential	Essential	1	1		Elective
929	PB File	BARC	Hosp-1	Apr-19	Gynaec	ObGy	2019-11-04		Cesarean birth	Cesarean birth | Essential	Cesarean Section	23	F		Regional Anesthesia: Spinal, Epidural and Regional Blocks	Essential	Essential	1	1		emergency
930	PB File	BARC	Hosp-1	Apr-19	Gynaec	ObGy	16-04-2019		Cesarean birth	Cesarean birth | Essential	Cesarean Section	31	F		Regional Anesthesia: Spinal, Epidural and Regional Blocks	Essential	Essential	1	1		Elective
931	PB File	BARC	Hosp-1	Apr-19	Gynaec	ObGy	20-04-2019		Cesarean birth	Cesarean birth | Essential	Cesarean Section	35	F		Regional Anesthesia: Spinal, Epidural and Regional Blocks	Essential	Essential	1	1		emergency
932	PB File	BARC	Hosp-1	Apr-19	Gynaec	ObGy	24-04-2019		Cesarean birth	Cesarean birth | Essential	Cesarean Section	35	M		Regional Anesthesia: Spinal, Epidural and Regional Blocks	Essential	Essential	1	1		emergency
933	PB File	BARC	Hosp-1	Apr-19	Gynaec	ObGy	24-04-2019		Cesarean birth	Cesarean birth | Essential	Cesarean Section	38	F		Regional Anesthesia: Spinal, Epidural and Regional Blocks	Essential	Essential	1	1		emergency
934	PB File	BARC	Hosp-1	Apr-19	Gynaec	ObGy	25-04-2019		Cesarean birth	Cesarean birth | Essential	Cesarean Section	31	F		Regional Anesthesia: Spinal, Epidural and Regional Blocks	Essential	Essential	1	1		Elective
935	PB File	BARC	Hosp-1	Apr-19	Gynaec	ObGy	25-04-2019		Cesarean birth	Cesarean birth | Essential	Cesarean Section	29	F		Regional Anesthesia: Spinal, Epidural and Regional Blocks	Essential	Essential	1	1		Elective
936	PB File	BARC	Hosp-1	Apr-19	Gynaec	ObGy	26-04-2019		Cesarean birth	Cesarean birth | Essential	Cesarean Section	33	F		Regional Anesthesia: Spinal, Epidural and Regional Blocks	Essential	Essential	1	1		emergency
937	PB File	BARC	Hosp-1	Apr-19	Gynaec	ObGy	30-04-2019		Cesarean birth	Cesarean birth | Essential	Cesarean Section	35	F		Regional Anesthesia: Spinal, Epidural and Regional Blocks	Essential	Essential	1	1		Elective
1048	PB File	Manipal	Hosp-4	Apr-19	Gynecology and Obstetrics	ObGy	2019-03-04		LSCS	Cesarean birth | Essential	Cesarean Section	28	F		Regional Anesthesia: Spinal, Epidural and Regional Blocks	Essential	Essential	1	1		Emergency
1049	PB File	Manipal	Hosp-4	Apr-19	Gynecology and Obstetrics	ObGy	2019-03-04		LSCS	Cesarean birth | Essential	Cesarean Section	31	F		Regional Anesthesia: Spinal, Epidural and Regional Blocks	Essential	Essential	1	1		Emergency
1050	PB File	Manipal	Hosp-4	Apr-19	Gynecology and Obstetrics	ObGy	2019-04-04		LSCS	Cesarean birth | Essential	Cesarean Section	87	F		Regional Anesthesia: Spinal, Epidural and Regional Blocks	Essential	Essential	1	1		Emergency
1051	PB File	Manipal	Hosp-4	Apr-19	Gynecology and Obstetrics	ObGy	2019-06-04		LSCS	Cesarean birth | Essential	Cesarean Section	35	F		Regional Anesthesia: Spinal, Epidural and Regional Blocks	Essential	Essential	1	1		Emergency
1052	PB File	Manipal	Hosp-4	Apr-19	Gynecology and Obstetrics	ObGy	2019-08-04		LSCS	Cesarean birth | Essential	Cesarean Section	29	F		Regional Anesthesia: Spinal, Epidural and Regional Blocks	Essential	Essential	1	1		Emergency
1053	PB File	Manipal	Hosp-4	Apr-19	Gynecology and Obstetrics	ObGy	2019-12-04		LSCS	Cesarean birth | Essential	Cesarean Section	30	F		Regional Anesthesia: Spinal, Epidural and Regional Blocks	Essential	Essential	1	1		Emergency
1054	PB File	Manipal	Hosp-4	Apr-19	Gynecology and Obstetrics	ObGy	13/4/2019		LSCS	Cesarean birth | Essential	Cesarean Section	37	F		Regional Anesthesia: Spinal, Epidural and Regional Blocks	Essential	Essential	1	1		Emergency
1055	PB File	Manipal	Hosp-4	Apr-19	Gynecology and Obstetrics	ObGy	13/4/2019		LSCS	Cesarean birth | Essential	Cesarean Section	32	F		Regional Anesthesia: Spinal, Epidural and Regional Blocks	Essential	Essential	1	1		Emergency
1056	PB File	Manipal	Hosp-4	Apr-19	Gynecology and Obstetrics	ObGy	15/4/2019		LSCS	Cesarean birth | Essential	Cesarean Section	30	F		Regional Anesthesia: Spinal, Epidural and Regional Blocks	Essential	Essential	1	1		Emergency
1057	PB File	Manipal	Hosp-4	Apr-19	Gynecology and Obstetrics	ObGy	15/4/2019		LSCS	Cesarean birth | Essential	Cesarean Section	30	F		Regional Anesthesia: Spinal, Epidural and Regional Blocks	Essential	Essential	1	1		Emergency
1058	PB File	Manipal	Hosp-4	Apr-19	Gynecology and Obstetrics	ObGy	18/4/2019		LSCS	Cesarean birth | Essential	Cesarean Section	36	F		Regional Anesthesia: Spinal, Epidural and Regional Blocks	Essential	Essential	1	1		Emergency
1059	PB File	Manipal	Hosp-4	Apr-19	Gynecology and Obstetrics	ObGy	21/4/2019		LSCS	Cesarean birth | Essential	Cesarean Section	30	F		General Anaesthesia	Essential	Essential	1	1		Emergency
1060	PB File	Manipal	Hosp-4	Apr-19	Gynecology and Obstetrics	ObGy	23/4/2019		LSCS	Cesarean birth | Essential	Cesarean Section	38	F		Regional Anesthesia: Spinal, Epidural and Regional Blocks	Essential	Essential	1	1		Emergency
1061	PB File	Manipal	Hosp-4	Apr-19	Gynecology and Obstetrics	ObGy	24/4/2019		LSCS	Cesarean birth | Essential	Cesarean Section	29	F		Regional Anesthesia: Spinal, Epidural and Regional Blocks	Essential	Essential	1	1		Emergency
1062	PB File	Manipal	Hosp-4	Apr-19	Gynecology and Obstetrics	ObGy	26/4/2019		LSCS	Cesarean birth | Essential	Cesarean Section	32	F		Regional Anesthesia: Spinal, Epidural and Regional Blocks	Essential	Essential	1	1		Emergency
1585	PB File	MAMC	Hosp-3	Apr-19	Gen.Surgery	GenSx	2019-11-04		Circumcision	Circumcision		38	M		Local anesthesia not supplemented by sedation or GA	Essential	Essential	4	4		Elective
1586	PB File	MAMC	Hosp-3	Apr-19	Gen.Surgery	GenSx	2019-04-18		Circumcision	Circumcision		44	M		Local anesthesia not supplemented by sedation or GA	Essential	Essential	4	4		Elective
1587	PB File	MAMC	Hosp-3	Apr-19	Gen.Surgery	GenSx	2019-04-20		Circumcision	Circumcision		13	M		Local anesthesia not supplemented by sedation or GA	Essential	Essential	4	4		Elective
1588	PB File	Terna	Hosp-5	Apr-19	General Surgery	GenSx	2019-01-04		CIRCUMCISSION	Circumcision		999	M		General Anaesthesia	Essential	Essential	4	4		Elective
1589	PB File	Terna	Hosp-5	Apr-19	General Surgery	GenSx	2019-06-04		CIRCUMCISION FOR BXO	Circumcision		999	M		General Anaesthesia	Essential	Essential	4	4		Elective
1590	PB File	Terna	Hosp-5	Apr-19	Gen surgery	GenSx	30/04/2019		TRANSURETHRAL RESECTION OF PROSTATE WITH CIRCUMCISSION	Others | Non Essential		999	M		Regional Anesthesia: Spinal, Epidural and Regional Blocks	Non-Essential	Non-Essential	4	4		Elective
1591	PB File	KEM	Hosp-2	Apr-19	General Surgery	GenSx	2019-04-29		Circumsion	Circumcision		75	M		Regional Anesthesia: Spinal, Epidural and Regional Blocks	Essential	Essential	4	4		Elective
1592	PB File	KEM	Hosp-2	Apr-19	General Surgery	GenSx	2019-04-15		Circumcision	Circumcision		43	999		General Anaesthesia	Essential	Essential	4	4		Elective
1593	PB File	KEM	Hosp-2	Apr-19	General Surgery	GenSx	2019-04-15		Circumcision	Circumcision		29	999		Local anesthesia not supplemented by sedation or GA	Essential	Essential	4	4		Elective
1594	PB File	BARC	Hosp-1	Apr-19	Surgical	GenSx	2019-08-04		Male circumcision	Circumcision		3	M		General Anaesthesia	Essential	Essential	4	4		Elective
1595	PB File	BARC	Hosp-1	Apr-19	Surgical	GenSx	2019-08-04		Male circumcision	Circumcision		6	M		General Anaesthesia	Essential	Essential	4	4		Elective
1596	PB File	BARC	Hosp-1	Apr-19	Surgical	GenSx	2019-08-04		Male circumcision	Circumcision		75	M		Local anesthesia not supplemented by sedation or GA	Essential	Essential	4	4		Elective
1597	PB File	BARC	Hosp-1	Apr-19	Surgical	GenSx	2019-10-04		Male circumcision	Circumcision		73	M		Local anesthesia not supplemented by sedation or GA	Essential	Essential	4	4		Elective
1598	PB File	BARC	Hosp-1	Apr-19	Surgical	GenSx	15-04-2019		Male circumcision	Circumcision		4	M		General Anaesthesia	Essential	Essential	4	4		Elective
1599	PB File	BARC	Hosp-1	Apr-19	Surgical	GenSx	22-04-2019		Male circumcision	Circumcision		7	M		Local anesthesia not supplemented by sedation or GA	Essential	Essential	4	4		Elective
1600	PB File	BARC	Hosp-1	Apr-19	Surgical	GenSx	22-04-2019		Male circumcision	Circumcision		4	M		General Anaesthesia	Essential	Essential	4	4		Elective
1601	PB File	BARC	Hosp-1	Apr-19	Surgical	GenSx	24-04-2019		Circumcision (IV)	Circumcision		3	M		General Anaesthesia	Essential	Essential	4	4		Elective
1602	PB File	Manipal	Hosp-4	Apr-19	Gen surgery	GenSx	2019-01-04		Circumcision and bilateral hydrocelectomy	Circumcision		28	M		General Anaesthesia	Essential	Essential	4	4		Elective
1603	PB File	Manipal	Hosp-4	Apr-19	GeneraL surgery	GenSx	2019-12-04		Circumcision	Circumcision		31	M		Local anesthesia not supplemented by sedation or GA	Essential	Essential	4	4		Elective
1604	PB File	MAMC	Hosp-3	Apr-19	Orthopedics	Ortho	2019-02-04		CRIF WITH ILN	CRIF		52	M		Regional Anesthesia: Spinal, Epidural and Regional Blocks	Non-Essential	Non-Essential	1	1		Elective
1605	PB File	MAMC	Hosp-3	Apr-19	Orthopedics	Ortho	2019-03-04		K- WIRE FIXATION	CRIF		50	M		Local anesthesia not supplemented by sedation or GA	Essential	Non-Essential	1	1		Elective
1606	PB File	MAMC	Hosp-3	Apr-19	Orthopedics	Ortho	2019-06-04		K WIRE FIXATION	CRIF		35	F		Local anesthesia not supplemented by sedation or GA	Essential	Non-Essential	1	1		Elective
1607	PB File	MAMC	Hosp-3	Apr-19	Orthopedics	Ortho	2019-09-04		CRIF WITH ILN	CRIF		23	M		Regional Anesthesia: Spinal, Epidural and Regional Blocks	Non-Essential	Non-Essential	1	1		Elective
1608	PB File	MAMC	Hosp-3	Apr-19	Orthopedics	Ortho	2019-10-04		CRIF WITH ILN	CRIF		65	F		Regional Anesthesia: Spinal, Epidural and Regional Blocks	Non-Essential	Non-Essential	1	1		Elective
1609	PB File	MAMC	Hosp-3	Apr-19	Orthopedics	Ortho	13/4/2019		CRIF WITH ILN	CRIF		29	M		Regional Anesthesia: Spinal, Epidural and Regional Blocks	Non-Essential	Non-Essential	1	1		Elective
1610	PB File	MAMC	Hosp-3	Apr-19	Orthopedics	Ortho	17/4/2019		CRIF WITH PFN	CRIF		59	M		Regional Anesthesia: Spinal, Epidural and Regional Blocks	Non-Essential	Non-Essential	1	1		Elective
1611	PB File	MAMC	Hosp-3	Apr-19	Orthopedics	Ortho	17/4/2019		K WIRE FIXATION	CRIF		40	M		Regional Anesthesia: Spinal, Epidural and Regional Blocks	Essential	Non-Essential	1	1		Emergency
1612	PB File	MAMC	Hosp-3	Apr-19	Orthopedics	Ortho	18/4/2019		K WIRE FIXATION	CRIF		16	M		General Anaesthesia	Essential	Non-Essential	1	1		Elective
1613	PB File	MAMC	Hosp-3	Apr-19	Orthopedics	Ortho	19/4/2019		CRIF WITH ILN	CRIF		24	M		Regional Anesthesia: Spinal, Epidural and Regional Blocks	Non-Essential	Non-Essential	1	1		Elective
1614	PB File	MAMC	Hosp-3	Apr-19	Orthopedics	Ortho	19/4/2019		CRIF WITH ILN	CRIF		28	M		Regional Anesthesia: Spinal, Epidural and Regional Blocks	Non-Essential	Non-Essential	1	1		Elective
1615	PB File	MAMC	Hosp-3	Apr-19	Orthopedics	Ortho	24/4/2019		CRIF WITH ILN	CRIF		26	M		Regional Anesthesia: Spinal, Epidural and Regional Blocks	Non-Essential	Non-Essential	1	1		Elective
1616	PB File	MAMC	Hosp-3	Apr-19	Orthopedics	Ortho	24/4/2019		CRIF WITH K WIRE	CRIF		14	F		General Anaesthesia	Non-Essential	Non-Essential	1	1		Elective
1617	PB File	MAMC	Hosp-3	Apr-19	Orthopedics	Ortho	25/4/2019		CRIF WITH PFN	CRIF		70	M		Regional Anesthesia: Spinal, Epidural and Regional Blocks	Non-Essential	Non-Essential	1	1		Elective
1618	PB File	MAMC	Hosp-3	Apr-19	Orthopedics	Ortho	26/4/2019		CRIF WITH INTERLOCKING NAIL	CRIF		15	M		Regional Anesthesia: Spinal, Epidural and Regional Blocks	Non-Essential	Non-Essential	1	1		Elective
1619	PB File	MAMC	Hosp-3	Apr-19	Orthopedics	Ortho	27/4/2019		CRIF WITH INTERLOCKING NAIL	CRIF		20	M		Regional Anesthesia: Spinal, Epidural and Regional Blocks	Non-Essential	Non-Essential	1	1		Elective
1620	PB File	MAMC	Hosp-3	Apr-19	Orthopedics	Ortho	28/4/2019		CRIF WITH NAILING	CRIF		19	M		Regional Anesthesia: Spinal, Epidural and Regional Blocks	Non-Essential	Non-Essential	1	1		Elective
1621	PB File	MAMC	Hosp-3	Apr-19	Orthopedics	Ortho	2019-04-01		CRIF WITH CCS	CRIF		30	M		Regional Anesthesia: Spinal, Epidural and Regional Blocks	Non-Essential	Non-Essential	1	1		Emergency
1622	PB File	MAMC	Hosp-3	Apr-19	Orthopedics	Ortho	2019-04-02		CRIF WITH PFN	CRIF		68	F		Regional Anesthesia: Spinal, Epidural and Regional Blocks	Non-Essential	Non-Essential	1	1		Emergency
1623	PB File	MAMC	Hosp-3	Apr-19	Orthopedics	Ortho	2019-04-02		CRIF WITH CCS	CRIF		12	M		General Anaesthesia	Non-Essential	Non-Essential	1	1		Emergency
1624	PB File	MAMC	Hosp-3	Apr-19	Orthopedics	Ortho	2019-04-02		CRIF WITH PFN	CRIF		40	M		Regional Anesthesia: Spinal, Epidural and Regional Blocks	Non-Essential	Non-Essential	1	1		Emergency
1625	PB File	MAMC	Hosp-3	Apr-19	Orthopedics	Ortho	2019-04-04		CRIF WITH PFN	CRIF		95	F		Regional Anesthesia: Spinal, Epidural and Regional Blocks	Non-Essential	Non-Essential	1	1		Emergency
1626	PB File	MAMC	Hosp-3	Apr-19	Orthopedics	Ortho	2019-04-05		CRIF WTH TENS	CRIF		5	M		General Anaesthesia	Non-Essential	Non-Essential	1	1		Emergency
1627	PB File	MAMC	Hosp-3	Apr-19	Orthopedics	Ortho	2019-04-08		CLOSED REDUCTION	CRIF		51	M		General Anaesthesia	Essential	Non-Essential	1	1		Emergency
1628	PB File	MAMC	Hosp-3	Apr-19	Orthopedics	Ortho	2019-04-08		CRIF WITH ILN	CRIF		55	F		Regional Anesthesia: Spinal, Epidural and Regional Blocks	Non-Essential	Non-Essential	1	1		Emergency
1629	PB File	MAMC	Hosp-3	Apr-19	Orthopedics	Ortho	2019-04-09		®CRIF WITH PFN	CRIF		19	M		General Anaesthesia	Non-Essential	Non-Essential	1	1		Emergency
1630	PB File	MAMC	Hosp-3	Apr-19	Orthopedics	Ortho	2019-04-10		CRIF WITH CCS	CRIF		35	M		Regional Anesthesia: Spinal, Epidural and Regional Blocks	Non-Essential	Non-Essential	1	1		Emergency
1631	PB File	MAMC	Hosp-3	Apr-19	Orthopedics	Ortho	2019-04-10		BIOPSY WITH CRIF WITH PFN	CRIF		65	M		Regional Anesthesia: Spinal, Epidural and Regional Blocks	Non-Essential	Non-Essential	1	1		Elective
1632	PB File	MAMC	Hosp-3	Apr-19	Orthopedics	Ortho	2019-04-12		CRIF WITH PFN	CRIF		70	M		Regional Anesthesia: Spinal, Epidural and Regional Blocks	Non-Essential	Non-Essential	1	1		Emergency
1633	PB File	MAMC	Hosp-3	Apr-19	Orthopedics	Ortho	2019-04-12		CRIF WITH PFN	CRIF		65	F		Regional Anesthesia: Spinal, Epidural and Regional Blocks	Non-Essential	Non-Essential	1	1		Emergency
1634	PB File	MAMC	Hosp-3	Apr-19	Orthopedics	Ortho	2019-04-15		CRIF WITH PFN	CRIF		70	M		Regional Anesthesia: Spinal, Epidural and Regional Blocks	Non-Essential	Non-Essential	1	1		Emergency
1635	PB File	MAMC	Hosp-3	Apr-19	Orthopedics	Ortho	2019-04-16		CRIF WITH TIBIAL NAILING	CRIF		32	M		Regional Anesthesia: Spinal, Epidural and Regional Blocks	Non-Essential	Non-Essential	1	1		Emergency
1636	PB File	MAMC	Hosp-3	Apr-19	Orthopedics	Ortho	2019-04-18		CRIF WITH PFN	CRIF		80	M		Regional Anesthesia: Spinal, Epidural and Regional Blocks	Non-Essential	Non-Essential	1	1		Emergency
1637	PB File	MAMC	Hosp-3	Apr-19	Orthopedics	Ortho	2019-04-20		CRIF WITH PFN	CRIF		60	F		Regional Anesthesia: Spinal, Epidural and Regional Blocks	Non-Essential	Non-Essential	1	1		Emergency
1638	PB File	MAMC	Hosp-3	Apr-19	Orthopedics	Ortho	2019-04-22		CRIF WITH DHS	CRIF		18	M		General Anaesthesia	Essential	Non-Essential	1	1		Emergency
1640	PB File	MAMC	Hosp-3	Apr-19	Orthopedics	Ortho	2019-04-24		CRIF WITH CCS	CRIF		19	M		Regional Anesthesia: Spinal, Epidural and Regional Blocks	Non-Essential	Non-Essential	1	1		Emergency
1641	PB File	MAMC	Hosp-3	Apr-19	Orthopedics	Ortho	2019-04-25		CRIF WITH PFN	CRIF		58	M		Regional Anesthesia: Spinal, Epidural and Regional Blocks	Non-Essential	Non-Essential	1	1		Emergency
1642	PB File	MAMC	Hosp-3	Apr-19	Orthopedics	Ortho	2019-04-25		CRIF WITH ILN	CRIF		28	M		Regional Anesthesia: Spinal, Epidural and Regional Blocks	Non-Essential	Non-Essential	1	1		Emergency
1643	PB File	MAMC	Hosp-3	Apr-19	Orthopedics	Ortho	2019-04-26		CRIF WITH ILN	CRIF		60	F		Regional Anesthesia: Spinal, Epidural and Regional Blocks	Non-Essential	Non-Essential	1	1		Emergency
1645	PB File	MAMC	Hosp-3	Apr-19	Ortho Em	Ortho	2019-05-04		K-wire fixation	CRIF		42	M		General Anaesthesia	Essential	Non-Essential	1	1		Emergency
1646	PB File	MAMC	Hosp-3	Apr-19	Ortho Em	Ortho	2019-06-04		K-wire fixation	CRIF		6	M		General Anaesthesia	Essential	Non-Essential	1	1		Emergency
1647	PB File	MAMC	Hosp-3	Apr-19	Ortho Em	Ortho	2019-04-20		K-wire removal	CRIF		21	F		General Anaesthesia	Essential	Non-Essential	1	1		Emergency
1676	PB File	Terna	Hosp-5	Apr-19	Orthopaedics	Ortho	2019-04-04		CRIF WITH K - WIRE OF LEFT SUPRACONDYLAR HUMERUS FRACTURE	CRIF		999	M		General Anaesthesia	Non-Essential	Non-Essential	1	1		Emergency
1677	PB File	Terna	Hosp-5	Apr-19	Orthopaedics	Ortho	13/04/2019		CRIF WITH K - WRING DISTAL END RADIUS	CRIF		999	F		General Anaesthesia	Non-Essential	Non-Essential	1	1		Emergency
1678	PB File	Terna	Hosp-5	Apr-19	Orthopaedics	Ortho	22/04/2019		CLOSED REDUCTION FOR LEFT HIP	CRIF		999	F		Regional Anesthesia: Spinal, Epidural and Regional Blocks	Essential	Non-Essential	1	1		Emergency
1679	PB File	Terna	Hosp-5	Apr-19	Orthopaedics	Ortho	25/04/2019		CRIF WITH INTRA MEDULLARY NAIL LEFT TIBIA	CRIF		999	M		Regional Anesthesia: Spinal, Epidural and Regional Blocks	Non-Essential	Non-Essential	1	1		Emergency
1684	PB File	KEM	Hosp-2	Apr-19	Ortho	Ortho	2019-04-10		Left CRIF $$	CRIF		89	M		Regional Anesthesia: Spinal, Epidural and Regional Blocks	Non-Essential	Non-Essential	1	1		Emergency
1685	PB File	KEM	Hosp-2	Apr-19	Ortho	Ortho	2019-04-18		K wire $	CRIF		47	F		General Anaesthesia	Essential	Non-Essential	1	1		Emergency
1686	PB File	KEM	Hosp-2	Apr-19	Ortho	Ortho	2019-04-27		Closed reduction left shoulder $	CRIF		58	F		Sedation	Essential	Non-Essential	1	1		Emergency
1687	PB File	KEM	Hosp-2	Apr-19	Ortho	Ortho	2019-04-22		$ wire deformity	CRIF		6	M		General Anaesthesia	Non-Essential	Non-Essential	1	1		Emergency
1688	PB File	KEM	Hosp-2	Apr-19	Ortho	Ortho	2019-04-12		Right comound tibia & fibula shaft # CRIF +ilizarov	CRIF		40	M		Regional Anesthesia: Spinal, Epidural and Regional Blocks	Non-Essential	Non-Essential	1	1		Emergency
1689	PB File	KEM	Hosp-2	Apr-19	Ortho	Ortho	2019-04-13		Left radius ulna shaft # for CRIF + K wiring	CRIF		17	M		Regional Anesthesia: Spinal, Epidural and Regional Blocks	Non-Essential	Non-Essential	1	1		Emergency
1690	PB File	KEM	Hosp-2	Apr-19	Ortho	Ortho	2019-04-30		Left supracondylar # CRIF	CRIF		13	M		General Anaesthesia	Non-Essential	Non-Essential	1	1		Emergency
1691	PB File	KEM	Hosp-2	Apr-19	Ortho	Ortho	2019-03-30		Close reduction for right # $	CRIF		10	M		Not available	Non-Essential	Non-Essential	1	1		Emergency
1692	PB File	KEM	Hosp-2	Apr-19	Ortho	Ortho	2019-04-30		$ Left shoulder disclocation $	CRIF		31	M		General Anaesthesia	Non-Essential	Non-Essential	1	1		Emergency
1693	PB File	BARC	Hosp-1	Apr-19	Ortho	Ortho	25-04-2019		Undisplaced fracture reduction	CRIF		10	M		General Anaesthesia	Essential	Non-Essential	1	1		Elective
1704	PB File	Manipal	Hosp-4	Apr-19	Orthopaedics	Ortho	2019-05-04		Closed reduction and internal fixation with long proximal femoral nailing for Intertrochanteric femur fracture	CRIF		68	M		Regional Anesthesia: Spinal, Epidural and Regional Blocks	Essential	Non-Essential	1	1		Emergency
1705	PB File	Manipal	Hosp-4	Apr-19	Orthopaedics	Ortho	2019-07-04		Closed reduction left elbow	CRIF		45	F		General Anaesthesia	Essential	Non-Essential	1	1		Emergency
1720	PB File	MAMC	Hosp-3	Apr-19	Ortho Em	Ortho	2019-05-04		Debridement- ilizarov fixator	Debridement of Open Fracture		42	M		General Anaesthesia	Essential	Essential	1	1		Emergency
1721	PB File	MAMC	Hosp-3	Apr-19	Ortho Em	Ortho	2019-07-04		Debridement Ext fixator	Debridement of Open Fracture		62	M		Regional Anesthesia: Spinal, Epidural and Regional Blocks	Essential	Essential	1	1		Emergency
1722	PB File	MAMC	Hosp-3	Apr-19	Ortho Em	Ortho	2019-04-24		Debridement and k- wire Fixation	Debridement of Open Fracture		35	M		General Anaesthesia	Essential	Essential	1	1		Emergency
1727	PB File	KEM	Hosp-2	Apr-19	General Surgery	GenSx	2019-04-17		Debridemnt of left LL	Debridement of Open Fracture		54	F		Regional Anesthesia: Spinal, Epidural and Regional Blocks	Non-Essential	Essential	1	1		Emergency
1728	PB File	KEM	Hosp-2	Apr-19	General Surgery	GenSx	2019-04-22		Debridment of fourner's gangrene	Debridement of Open Fracture		13	M		General Anaesthesia	Non-Essential	Essential	1	1		Emergency
1730	PB File	KEM	Hosp-2	Apr-19	Ortho	Ortho	2019-04-01		Right foot shaft $$ for debridement + $ fixation	Debridement of Open Fracture		54	M		General Anaesthesia	Essential	Essential	1	1		Emergency
1731	PB File	KEM	Hosp-2	Apr-19	Ortho	Ortho	2019-04-03		Left septic $$	Debridement of Open Fracture		999	M		Regional Anesthesia: Spinal, Epidural and Regional Blocks	Essential	Essential	1	1		Emergency
1742	PB File	MAMC	Hosp-3	Apr-19	Gyne Em	ObGy	2019-04-16		Exp lap (D & C done outside with bowel injury)	Dilatation and curettage		18	F		General Anaesthesia	Essential	Essential	1	1		Emergency
1760	PB File	Terna	Hosp-5	Apr-19	Obstetrics & Gynaecology	ObGy	2019-01-04		Dilatation and curretage FOR MENORRHAGIA	Dilatation and curettage		999	F		Regional Anesthesia: Spinal, Epidural and Regional Blocks	Essential	Essential	1	1		Elective
1761	PB File	Terna	Hosp-5	Apr-19	Obstetrics & Gynaecology	ObGy	2019-04-04		Dilatation and curretage WITH COPPER T REMOVAL FOR MENNORRHAGIA	Dilatation and curettage		999	F		Regional Anesthesia: Spinal, Epidural and Regional Blocks	Essential	Essential	1	1		Elective
1762	PB File	Terna	Hosp-5	Apr-19	Obstetrics & Gynaecology	ObGy	2019-09-04		DILATATION & CURRETAGE FOR BLEEDING PV	Dilatation and curettage		999	F		Not available	Essential	Essential	1	1		Elective
1763	PB File	Terna	Hosp-5	Apr-19	Obstetrics & Gynaecology	ObGy	2019-10-04		Dilatation and curretage WITH CEVIX BIOPSY	Dilatation and curettage		999	F		Regional Anesthesia: Spinal, Epidural and Regional Blocks	Essential	Essential	1	1		Elective
1764	PB File	Terna	Hosp-5	Apr-19	Obstetrics & Gynaecology	ObGy	2019-11-04		DILATATION & CURRETAGE FOR BLEEDING PV	Dilatation and curettage		999	F		Regional Anesthesia: Spinal, Epidural and Regional Blocks	Essential	Essential	1	1		Elective
1765	PB File	Terna	Hosp-5	Apr-19	Obstetrics & Gynaecology	ObGy	2019-12-04		HYSTEROSCOPY DIGNOSTIC + D & C FOR INFERTILITY	Dilatation and curettage		999	F		General Anaesthesia	Essential	Essential	1	1		Elective
1766	PB File	Terna	Hosp-5	Apr-19	Obstetrics & Gynaecology	ObGy	2019-12-04		Dilatation and curretage	Dilatation and curettage		999	F		Regional Anesthesia: Spinal, Epidural and Regional Blocks	Essential	Essential	1	1		Elective
1767	PB File	Terna	Hosp-5	Apr-19	Obstetrics & Gynaecology	ObGy	2019-12-04		Dilatation and curretage WITH CERVIX BIOPSY	Dilatation and curettage		999	F		Regional Anesthesia: Spinal, Epidural and Regional Blocks	Essential	Essential	1	1		Elective
1768	PB File	Terna	Hosp-5	Apr-19	Obstetrics & Gynaecology	ObGy	14/04/2019		1 ST TRIMESTER MTP	Dilatation and curettage		999	F		General Anaesthesia	Essential	Essential	1	1		Elective
1769	PB File	Terna	Hosp-5	Apr-19	Obstetrics & Gynaecology	ObGy	16/04/2019		DILATATION WITH CURRETAGE	Dilatation and curettage		999	F		General Anaesthesia	Essential	Essential	1	1		Elective
1770	PB File	Terna	Hosp-5	Apr-19	Obstetrics & Gynaecology	ObGy	18/09/2019		DIALATATION &CURRETTAGE FOR BLEEDING PV	Dilatation and curettage		999	F		General Anaesthesia	Essential	Essential	1	1		Elective
1771	PB File	Terna	Hosp-5	Apr-19	Obstetrics & Gynaecology	ObGy	25/04/2019		Dilatation and curretage WITH CX BIOPSY	Dilatation and curettage		999	F		Regional Anesthesia: Spinal, Epidural and Regional Blocks	Essential	Essential	1	1		Elective
1773	PB File	KEM	Hosp-2	Apr-19	OBGY	ObGy	2019-04-01		Diagnostic hystero-laparoscopy with chromo pertubation with dilation and Curettay	Dilatation and curettage		28	F		General Anaesthesia	Essential	Essential	1	1		Emergency
1774	PB File	KEM	Hosp-2	Apr-19	OBGY	ObGy	2019-04-04		Check curettage	Dilatation and curettage		30	F		Sedation	Essential	Essential	1	2		Emergency
1775	PB File	KEM	Hosp-2	Apr-19	OBGY	ObGy	2019-04-04		Suction and XXXX	Dilatation and curettage		23	F		Sedation	Essential	Essential	1	1		Emergency
1776	PB File	KEM	Hosp-2	Apr-19	OBGY	ObGy	2019-04-04		Check curettage	Dilatation and curettage		31	F		Sedation	Essential	Essential	1	2		Emergency
1777	PB File	KEM	Hosp-2	Apr-19	OBGY	ObGy	2019-04-13		Hysterectoscopy and Dilatation curettage with Chromo pertubation	Dilatation and curettage		25	F		General Anaesthesia	Essential	Essential	1	1		Emergency
1778	PB File	KEM	Hosp-2	Apr-19	OBGY	ObGy	2019-04-13		Dilatation and Curettage with Polypectomy	Dilatation and curettage		35	F		Sedation	Essential	Essential	1	1		Emergency
1779	PB File	KEM	Hosp-2	Apr-19	OBGY	ObGy	2019-04-15		Dilatation and Curettage	Dilatation and curettage		45	F		Sedation	Essential	Essential	1	1		Emergency
1780	PB File	KEM	Hosp-2	Apr-19	OBGY	ObGy	2019-04-16		Hysterectoscopy with Dilatation curettage of polypectomy	Dilatation and curettage		45	F		Sedation	Essential	Essential	1	1		Emergency
1781	PB File	KEM	Hosp-2	Apr-19	OBGY	ObGy	2019-04-26		Emergency check curettage	Dilatation and curettage		999	F		Sedation	Essential	Essential	1	1		Emergency
1782	PB File	KEM	Hosp-2	Apr-19	OBGY	ObGy	2019-04-26		Suction and evacuation	Dilatation and curettage		38	F		Sedation	Essential	Essential	1	1		Emergency
1783	PB File	KEM	Hosp-2	Apr-19	OBGY	ObGy	2019-04-26		Suction and evacuation	Dilatation and curettage		30	F		Sedation	Essential	Essential	1	1		Emergency
1784	PB File	KEM	Hosp-2	Apr-19	OBGY	ObGy	2019-04-27		Dilatation Curettage	Dilatation and curettage		45	F		Sedation	Essential	Essential	1	1		Emergency
1785	PB File	KEM	Hosp-2	Apr-19	OBGY	ObGy	2019-04-27		Dilatation Curettage with cervical biopsy	Dilatation and curettage		40	F		Sedation	Essential	Essential	1	1		Emergency
1786	PB File	KEM	Hosp-2	Apr-19	OBGY	ObGy	2019-04-27		Dilatation Curettage	Dilatation and curettage		40	F		Sedation	Essential	Essential	1	1		Emergency
1787	PB File	KEM	Hosp-2	Apr-19	OBGY	ObGy	2019-04-29		Emergency check curettage	Dilatation and curettage		22	F		Sedation	Essential	Essential	1	1		Emergency
1788	PB File	KEM	Hosp-2	Apr-19	OBGY	ObGy	2019-04-29		Emergency check curettage	Dilatation and curettage		34	F		Sedation	Essential	Essential	1	1		Emergency
1789	PB File	KEM	Hosp-2	Apr-19	OBGY	ObGy	2019-04-29		Polypectomy xx Dilatation and Curettage	Dilatation and curettage		40	F		Sedation	Essential	Essential	1	1		Emergency
1790	PB File	KEM	Hosp-2	Apr-19	OBGY	ObGy	2019-04-30		Diagnostic Hysterectomy , Diagnostic Laproscopy , Dilatation Curettage	Dilatation and curettage		26	F		General Anaesthesia	Essential	Essential	1	1		Emergency
1791	PB File	KEM	Hosp-2	Apr-19	OBGY	ObGy	2019-03-31		Emergency check curettage	Dilatation and curettage		24	F		Sedation	Essential	Essential	1	1		Emergency
1792	PB File	KEM	Hosp-2	Apr-19	OBGY	ObGy	2019-04-01		Colposcopy xx d & C cervical biopsy	Dilatation and curettage		37	F		Sedation	Essential	Essential	1	1		Emergency
1793	PB File	KEM	Hosp-2	Apr-19	OBGY	ObGy	2019-04-02		Emergency check curettage	Dilatation and curettage		30	F		Local anesthesia not supplemented by sedation or GA	Essential	Essential	1	1		Emergency
1794	PB File	KEM	Hosp-2	Apr-19	OBGY	ObGy	2019-04-02		Emergency check curettage	Dilatation and curettage		23	F		Sedation	Essential	Essential	1	1		Emergency
1795	PB File	KEM	Hosp-2	Apr-19	OBGY	ObGy	2019-04-03		Emergency Check curettage	Dilatation and curettage		25	F		Sedation	Essential	Essential	1	1		Emergency
1796	PB File	KEM	Hosp-2	Apr-19	OBGY	ObGy	2019-04-03		Emergency Check curettage	Dilatation and curettage		25	F		Sedation	Essential	Essential	1	1		Emergency
1797	PB File	KEM	Hosp-2	Apr-19	OBGY	ObGy	2019-04-03		Dilatation and evacuation under ultrasound guidance	Dilatation and curettage		34	F		Sedation	Essential	Essential	1	1		Emergency
1798	PB File	KEM	Hosp-2	Apr-19	OBGY	ObGy	2019-04-03		Emergency Check curettage	Dilatation and curettage		28	F		Sedation	Essential	Essential	1	1		Emergency
1799	PB File	KEM	Hosp-2	Apr-19	OBGY	ObGy	2019-04-05		Emergency check curettage	Dilatation and curettage		22	F		Sedation	Essential	Essential	1	1		Emergency
1800	PB File	KEM	Hosp-2	Apr-19	OBGY	ObGy	2019-04-05		Emergency check curettage	Dilatation and curettage		20	F		Sedation	Essential	Essential	1	1		Emergency
1801	PB File	KEM	Hosp-2	Apr-19	OBGY	ObGy	2019-04-05		Emergency check curettage	Dilatation and curettage		35	F		Regional Anesthesia: Spinal, Epidural and Regional Blocks	Essential	Essential	1	1		Emergency
1802	PB File	KEM	Hosp-2	Apr-19	OBGY	ObGy	2019-04-06		Emergency Dilatation and Curettage	Dilatation and curettage		35	F		Sedation	Essential	Essential	1	1		Emergency
1803	PB File	KEM	Hosp-2	Apr-19	OBGY	ObGy	2019-04-06		Emergency check curettage	Dilatation and curettage		28	F		Sedation	Essential	Essential	1	1		Emergency
1804	PB File	KEM	Hosp-2	Apr-19	OBGY	ObGy	2019-04-09		Emergency check curettage	Dilatation and curettage		28	F		Regional Anesthesia: Spinal, Epidural and Regional Blocks	Essential	Essential	1	1		Emergency
1805	PB File	KEM	Hosp-2	Apr-19	OBGY	ObGy	2019-04-10		Emergency check curettage	Dilatation and curettage		26	F		Sedation	Essential	Essential	1	1		Emergency
1806	PB File	KEM	Hosp-2	Apr-19	OBGY	ObGy	2019-04-11		Polypectomy xx Dilatation and Curettage	Dilatation and curettage		43	F		Sedation	Essential	Essential	1	1		Emergency
1807	PB File	KEM	Hosp-2	Apr-19	OBGY	ObGy	2019-04-11		Dilatation and Curettage with cervical biopsy	Dilatation and curettage		65	F		General Anaesthesia	Essential	Essential	1	1		Emergency
1808	PB File	KEM	Hosp-2	Apr-19	OBGY	ObGy	2019-04-12		Emergency check curettage	Dilatation and curettage		32	F		Sedation	Essential	Essential	1	1		Emergency
1809	PB File	KEM	Hosp-2	Apr-19	OBGY	ObGy	2019-04-12		Emergency check curettage	Dilatation and curettage		999	F		Sedation	Essential	Essential	1	1		Emergency
1810	PB File	KEM	Hosp-2	Apr-19	OBGY	ObGy	2019-04-12		Emergency check curettage	Dilatation and curettage		35	F		Sedation	Essential	Essential	1	1		Emergency
1811	PB File	KEM	Hosp-2	Apr-19	OBGY	ObGy	2019-04-12		Dilatation and Curettage	Dilatation and curettage		40	F		Not available	Essential	Essential	1	1		Emergency
1812	PB File	KEM	Hosp-2	Apr-19	OBGY	ObGy	2019-04-12		Laproscopy with chromo pertubation with Dilatation Curettage	Dilatation and curettage		30	F		General Anaesthesia	Essential	Essential	1	1		Emergency
1813	PB File	KEM	Hosp-2	Apr-19	OBGY	ObGy	2019-04-12		Dilatation and Curettage	Dilatation and curettage		45	F		Sedation	Essential	Essential	1	1		Emergency
1814	PB File	KEM	Hosp-2	Apr-19	OBGY	ObGy	2019-04-12		Dilatation and Currtage	Dilatation and curettage		45	F		Sedation	Essential	Essential	1	1		Emergency
1815	PB File	KEM	Hosp-2	Apr-19	OBGY	ObGy	2019-04-12		Emergency check curettage	Dilatation and curettage		23	F		Sedation	Essential	Essential	1	1		Emergency
1816	PB File	KEM	Hosp-2	Apr-19	OBGY	ObGy	2019-04-13		Dilatation and evacuation	Dilatation and curettage		24	F		Sedation	Essential	Essential	1	1		Emergency
1817	PB File	KEM	Hosp-2	Apr-19	OBGY	ObGy	2019-04-13		Emergency check curettage	Dilatation and curettage		32	F		Sedation	Essential	Essential	1	1		Emergency
1818	PB File	KEM	Hosp-2	Apr-19	OBGY	ObGy	2019-04-14		Emergency check curettage	Dilatation and curettage		35	F		Not available	Essential	Essential	1	1		Emergency
1819	PB File	KEM	Hosp-2	Apr-19	OBGY	ObGy	2019-04-15		Check Curettege	Dilatation and curettage		25	F		Sedation	Essential	Essential	1	1		Emergency
1820	PB File	KEM	Hosp-2	Apr-19	OBGY	ObGy	2019-04-15		Check Curettege	Dilatation and curettage		24	F		Sedation	Essential	Essential	1	1		Elective
1821	PB File	KEM	Hosp-2	Apr-19	OBGY	ObGy	2019-04-15		Suction and evacuation	Dilatation and curettage		20	F		Sedation	Essential	Essential	1	1		Elective
1822	PB File	KEM	Hosp-2	Apr-19	OBGY	ObGy	2019-04-15		Check Curettege	Dilatation and curettage		25	F		Sedation	Essential	Essential	1	1		Emergency
1823	PB File	KEM	Hosp-2	Apr-19	OBGY	ObGy	2019-04-17		Emergency check curettage	Dilatation and curettage		999	F		Sedation	Essential	Essential	1	1		Emergency
1824	PB File	KEM	Hosp-2	Apr-19	OBGY	ObGy	2019-04-18		Dilatation and Curettage	Dilatation and curettage		38	F		Sedation	Essential	Essential	1	1		Emergency
1825	PB File	KEM	Hosp-2	Apr-19	OBGY	ObGy	2019-04-18		Check Curettege	Dilatation and curettage		24	F		Sedation	Essential	Essential	1	1		Emergency
1826	PB File	KEM	Hosp-2	Apr-19	OBGY	ObGy	2019-04-18		Emergency check curettage	Dilatation and curettage		36	F		Sedation	Essential	Essential	1	1		Emergency
1827	PB File	KEM	Hosp-2	Apr-19	OBGY	ObGy	2019-04-18		Emergency check curettage	Dilatation and curettage		25	F		Sedation	Essential	Essential	1	1		Emergency
1828	PB File	KEM	Hosp-2	Apr-19	OBGY	ObGy	2019-04-19		Emergency check curettage	Dilatation and curettage		30	F		Sedation	Essential	Essential	1	1		Emergency
1829	PB File	KEM	Hosp-2	Apr-19	OBGY	ObGy	2019-04-19		Emergency check curettage	Dilatation and curettage		35	F		Sedation	Essential	Essential	1	1		Emergency
1830	PB File	KEM	Hosp-2	Apr-19	OBGY	ObGy	2019-04-19		Suction and evacuation	Dilatation and curettage		25	F		Sedation	Essential	Essential	1	1		Emergency
1831	PB File	KEM	Hosp-2	Apr-19	OBGY	ObGy	xx		Suction and evacuation	Dilatation and curettage		999	F		Sedation	Essential	Essential	1	1		Emergency
1832	PB File	KEM	Hosp-2	Apr-19	OBGY	ObGy	xx		Dilatation and Curettage with polypectomy	Dilatation and curettage		45	F		Sedation	Essential	Essential	1	1		Emergency
1833	PB File	KEM	Hosp-2	Apr-19	OBGY	ObGy	xx		Emergency check curettage	Dilatation and curettage		75	F		Sedation	Essential	Essential	1	1		Emergency
1834	PB File	KEM	Hosp-2	Apr-19	OBGY	ObGy	2019-04-19		Emergency check curettage	Dilatation and curettage		45	F		Sedation	Essential	Essential	1	1		Emergency
1835	PB File	KEM	Hosp-2	Apr-19	OBGY	ObGy	2019-04-21		Emergency check curettage	Dilatation and curettage		36	F		Sedation	Essential	Essential	1	1		Emergency
1836	PB File	KEM	Hosp-2	Apr-19	OBGY	ObGy	2019-04-21		Emergency check curettage	Dilatation and curettage		999	F		Sedation	Essential	Essential	1	1		Emergency
1837	PB File	BARC	Hosp-1	Apr-19	Gynaec	ObGy	2019-02-04		Dilatation and curettage	Dilatation and curettage		52	F		Regional Anesthesia: Spinal, Epidural and Regional Blocks	Essential	Essential	1	1		Elective
1838	PB File	BARC	Hosp-1	Apr-19	Gynaec	ObGy	2019-02-04		Dilatation and curettage	Dilatation and curettage		34	F		Sedation	Essential	Essential	1	1		Elective
1839	PB File	BARC	Hosp-1	Apr-19	Gynaec	ObGy	2019-03-04		Dilatation and curettage I/V Sedation,LA Essential No category assigned in NHS elective	Dilatation and curettage		32	F		Not available	Essential	Essential	1	1		Elective
1840	PB File	BARC	Hosp-1	Apr-19	Gynaec	ObGy	2019-03-04		Dilatation and curettage	Dilatation and curettage		37	F		Sedation	Essential	Essential	1	1		emergency
1841	PB File	BARC	Hosp-1	Apr-19	Gynaec	ObGy	2019-04-04		Dilatation and curettage	Dilatation and curettage		34	F		Sedation	Essential	Essential	1	1		Elective
1842	PB File	BARC	Hosp-1	Apr-19	Gynaec	ObGy	2019-04-04		Dilatation and curettage	Dilatation and curettage		53	F		General Anaesthesia	Essential	Essential	1	1		Elective
1843	PB File	BARC	Hosp-1	Apr-19	Gynaec	ObGy	2019-09-04		Dilatation and curettage	Dilatation and curettage		49	F		General Anaesthesia	Essential	Essential	1	1		Elective
1844	PB File	BARC	Hosp-1	Apr-19	Gynaec	ObGy	2019-09-04		Dilatation and curettage	Dilatation and curettage		52	F		General Anaesthesia	Essential	Essential	1	1		Elective
1845	PB File	BARC	Hosp-1	Apr-19	Gynaec	ObGy	2019-09-04		Dilatation and curettage	Dilatation and curettage		54	F		Sedation	Essential	Essential	1	1		Elective
1846	PB File	BARC	Hosp-1	Apr-19	Gynaec	ObGy	2019-09-04		Dilatation and curettage	Dilatation and curettage		32	F		Sedation	Essential	Essential	1	1		Elective
1847	PB File	BARC	Hosp-1	Apr-19	Gynaec	ObGy	2019-09-04		Dilatation and curettage	Dilatation and curettage		32	F		Sedation	Essential	Essential	1	1		Elective
1848	PB File	BARC	Hosp-1	Apr-19	Gynaec	ObGy	2019-11-04		Dilatation and curettage	Dilatation and curettage		51	F		General Anaesthesia	Essential	Essential	1	1		Elective
1849	PB File	BARC	Hosp-1	Apr-19	Gynaec	ObGy	2019-11-04		Dilatation and curettage	Dilatation and curettage		50	F		General Anaesthesia	Essential	Essential	1	1		Elective
1850	PB File	BARC	Hosp-1	Apr-19	Gynaec	ObGy	2019-11-04		Dilatation and curettage	Dilatation and curettage		40	F		General Anaesthesia	Essential	Essential	1	1		Elective
1851	PB File	BARC	Hosp-1	Apr-19	Gynaec	ObGy	16-04-2019		Dilatation and curettage	Dilatation and curettage		47	F		General Anaesthesia	Essential	Essential	1	1		Elective
1852	PB File	BARC	Hosp-1	Apr-19	Gynaec	ObGy	16-04-2019		Dilatation and curettage	Dilatation and curettage		49	F		General Anaesthesia	Essential	Essential	1	1		Elective
1853	PB File	BARC	Hosp-1	Apr-19	Gynaec	ObGy	16-04-2019		Dilatation and curettage	Dilatation and curettage		51	F		General Anaesthesia	Essential	Essential	1	1		Elective
1854	PB File	BARC	Hosp-1	Apr-19	Gynaec	ObGy	16-04-2019		Dilatation and curettage	Dilatation and curettage		42	F		General Anaesthesia	Essential	Essential	1	1		Elective
1855	PB File	BARC	Hosp-1	Apr-19	Gynaec	ObGy	16-04-2019		Dilatation and curettage	Dilatation and curettage		51	F		General Anaesthesia	Essential	Essential	1	1		Elective
1856	PB File	BARC	Hosp-1	Apr-19	Gynaec	ObGy	18-04-2019		Dilatation and curettage	Dilatation and curettage		47	F		General Anaesthesia	Essential	Essential	1	1		Elective
1857	PB File	BARC	Hosp-1	Apr-19	Gynaec	ObGy	18-04-2019		Dilatation and curettage	Dilatation and curettage		54	F		General Anaesthesia	Essential	Essential	1	1		Elective
1858	PB File	BARC	Hosp-1	Apr-19	Gynaec	ObGy	18-04-2019		Dilatation and curettage	Dilatation and curettage		45	F		General Anaesthesia	Essential	Essential	1	1		Elective
1859	PB File	BARC	Hosp-1	Apr-19	Gynaec	ObGy	23-04-2019		Dilatation and curettage	Dilatation and curettage		44	F		General Anaesthesia	Essential	Essential	1	1		Elective
1860	PB File	BARC	Hosp-1	Apr-19	Gynaec	ObGy	23-04-2019		Dilatation and curettage	Dilatation and curettage		54	F		General Anaesthesia	Essential	Essential	1	1		Elective
1861	PB File	BARC	Hosp-1	Apr-19	Gynaec	ObGy	23-04-2019		Dilatation and curettage	Dilatation and curettage		53	F		General Anaesthesia	Essential	Essential	1	1		Elective
1862	PB File	BARC	Hosp-1	Apr-19	Gynaec	ObGy	23-04-2019		Dilatation and curettage	Dilatation and curettage		54	F		General Anaesthesia	Essential	Essential	1	1		Elective
1863	PB File	BARC	Hosp-1	Apr-19	Gynaec	ObGy	25-04-2019		Dilatation and curettage	Dilatation and curettage		56	F		General Anaesthesia	Essential	Essential	1	1		Elective
1864	PB File	BARC	Hosp-1	Apr-19	Gynaec	ObGy	26-04-2019		Dilatation and curettage	Dilatation and curettage		29	F		General Anaesthesia	Essential	Essential	1	1		emergency
1865	PB File	BARC	Hosp-1	Apr-19	Gynaec	ObGy	30-04-2019		Dilatation and curettage	Dilatation and curettage		57	F		General Anaesthesia	Essential	Essential	1	1		Elective
1866	PB File	BARC	Hosp-1	Apr-19	Gynaec	ObGy	30-04-2019		Dilatation and curettage	Dilatation and curettage		33	F		General Anaesthesia	Essential	Essential	1	1		Elective
1870	PB File	Manipal	Hosp-4	Apr-19	Gynecology and Obstetrics	ObGy	2019-09-04		D and C , USG guided	Dilatation and curettage		26	F		General Anaesthesia	Essential	Essential	1	1		Emergency
1871	PB File	Manipal	Hosp-4	Apr-19	Gynecology and Obstetrics	ObGy	26/4/2019		D and C , USG guided	Dilatation and curettage		27	F		General Anaesthesia	Essential	Essential	1	1		Emergency
1872	PB File	Manipal	Hosp-4	Apr-19	Gynecology and Obstetrics	ObGy	26/4/2019		D and C , USG guided	Dilatation and curettage		33	F		General Anaesthesia	Essential	Essential	1	1		Emergency
1873	PB File	Manipal	Hosp-4	Apr-19	Gynecology and Obstetrics	ObGy	27/4/2019		D and C , USG guided	Dilatation and curettage		29	F		General Anaesthesia	Essential	Essential	1	1		Emergency
1903	PB File	MAMC	Hosp-3	Apr-19	Gen.Surgery	GenSx	2019-02-04		I & D (Breast Abscess)	Drainage of Abscess/Debridement | Essential		65	F		Local anesthesia not supplemented by sedation or GA	Essential	Essential	1	1	1	Elective
1904	PB File	MAMC	Hosp-3	Apr-19	Gen.Surgery	GenSx	2019-03-04		Secondary Suturing of Laparotomy wound	Drainage of Abscess/Debridement | Essential		42	F		Local anesthesia not supplemented by sedation or GA	Essential	Essential	1	1		Elective
1905	PB File	MAMC	Hosp-3	Apr-19	Gen.Surgery	GenSx	2019-10-04		Sec Suturing for Laparotomy Wound	Drainage of Abscess/Debridement | Essential		45	M		Local anesthesia not supplemented by sedation or GA	Non-Essential	Essential	1	1		Elective
1906	PB File	MAMC	Hosp-3	Apr-19	Orthopedics	Ortho	2019-08-04		DEBRIDEMENT	Drainage of Abscess/Debridement | Essential		30	M		General Anaesthesia	Non-Essential	Essential	1	1		Emergency
1907	PB File	MAMC	Hosp-3	Apr-19	Orthopedics	Ortho	27/4/2019		DEBRIDEMENT WITH LAVAGE	Drainage of Abscess/Debridement | Essential		55	M		Regional Anesthesia: Spinal, Epidural and Regional Blocks	Non-Essential	Essential	1	1		Elective
1908	PB File	MAMC	Hosp-3	Apr-19	Ortho Surg	Ortho	2019-01-04		I+D+Fasciotomy	Drainage of Abscess/Debridement | Essential		50	M		Regional Anesthesia: Spinal, Epidural and Regional Blocks	Non-Essential	Essential	1	1		Emergency
1909	PB File	MAMC	Hosp-3	Apr-19	Surgery Em	GenSx	2019-02-04		I & D (Hand Abscess)	Drainage of Abscess/Debridement | Essential		23	M		Regional Anesthesia: Spinal, Epidural and Regional Blocks	Essential	Essential	1	1		Emergency
1910	PB File	MAMC	Hosp-3	Apr-19	Surgery Em	GenSx	2019-03-04		Diabetic foot debridement	Drainage of Abscess/Debridement | Essential		72	M		Regional Anesthesia: Spinal, Epidural and Regional Blocks	Non-Essential	Essential	1	1		Emergency
1911	PB File	MAMC	Hosp-3	Apr-19	Ortho Em	Ortho	2019-03-04		I & D (Septic arthritis)	Drainage of Abscess/Debridement | Essential		10	M		General Anaesthesia	Essential	Essential	1	1		Emergency
1912	PB File	MAMC	Hosp-3	Apr-19	Ortho Em	Ortho	2019-05-04		Debridement + wound wash	Drainage of Abscess/Debridement | Essential		45	M		General Anaesthesia	Non-Essential	Essential	1	1		Emergency
1913	PB File	MAMC	Hosp-3	Apr-19	Ortho Em	Ortho	2019-06-04		I & D	Drainage of Abscess/Debridement | Essential		55	F		General Anaesthesia	Essential	Essential	1	1		Emergency
1914	PB File	MAMC	Hosp-3	Apr-19	Ortho Em	Ortho	2019-08-04		I & D (Collection)	Drainage of Abscess/Debridement | Essential		35	M		General Anaesthesia	Essential	Essential	1	1		Emergency
1915	PB File	MAMC	Hosp-3	Apr-19	Surgery Em	GenSx	2019-09-04		I & D	Drainage of Abscess/Debridement | Essential		52	M		Regional Anesthesia: Spinal, Epidural and Regional Blocks	Essential	Essential	1	1		Emergency
1916	PB File	MAMC	Hosp-3	Apr-19	Surgery Em	GenSx	2019-10-04		Diabetic foot debridement	Drainage of Abscess/Debridement | Essential		48	F		Regional Anesthesia: Spinal, Epidural and Regional Blocks	Non-Essential	Essential	1	1		Emergency
1917	PB File	MAMC	Hosp-3	Apr-19	Ortho Em	Ortho	2019-10-04		I & D	Drainage of Abscess/Debridement | Essential		3	F		General Anaesthesia	Essential	Essential	1	1		Emergency
1918	PB File	MAMC	Hosp-3	Apr-19	Ortho Em	Ortho	2019-11-04		External Fixator Wound Debridement	Drainage of Abscess/Debridement | Essential		18	M		General Anaesthesia	Essential	Essential	1	1		Emergency
1919	PB File	MAMC	Hosp-3	Apr-19	Ortho Em	Ortho	2019-12-04		I & D	Drainage of Abscess/Debridement | Essential		13	M		Regional Anesthesia: Spinal, Epidural and Regional Blocks	Essential	Essential	1	1		Emergency
1921	PB File	MAMC	Hosp-3	Apr-19	Surgery Em	GenSx	2019-04-18		B/K (Wet gangrene)	Drainage of Abscess/Debridement | Essential		47	M		Not available	Non-Essential	Essential	1	1		Emergency
1922	PB File	MAMC	Hosp-3	Apr-19	Ortho Em	Ortho	2019-04-18		Debridement and Curettage	Drainage of Abscess/Debridement | Essential		23	M		Not available	Non-Essential	Essential	1	1		Emergency
1923	PB File	MAMC	Hosp-3	Apr-19	Surgery Em	GenSx	2019-04-19		I & D	Drainage of Abscess/Debridement | Essential		14	M		Local anesthesia not supplemented by sedation or GA	Essential	Essential	1	1		Emergency
1924	PB File	MAMC	Hosp-3	Apr-19	Ortho Em	Ortho	2019-04-19		Wound wash & debridement	Drainage of Abscess/Debridement | Essential		35	M		General Anaesthesia	Non-Essential	Essential	1	1		Emergency
1925	PB File	MAMC	Hosp-3	Apr-19	Surgery Em	GenSx	2019-04-22		I & D (Thigh abscess)	Drainage of Abscess/Debridement | Essential		48	M		Regional Anesthesia: Spinal, Epidural and Regional Blocks	Essential	Essential	1	1		Emergency
1926	PB File	MAMC	Hosp-3	Apr-19	Ortho Em	Ortho	2019-04-22		Wound wash & debridement	Drainage of Abscess/Debridement | Essential		9	M		General Anaesthesia	Non-Essential	Essential	1	1		Emergency
1927	PB File	MAMC	Hosp-3	Apr-19	Ortho Em	Ortho	2019-04-23		Wound wash & debridement	Drainage of Abscess/Debridement | Essential		95	F		Regional Anesthesia: Spinal, Epidural and Regional Blocks	Non-Essential	Essential	1	1		Emergency
1928	PB File	MAMC	Hosp-3	Apr-19	Surgery Em	GenSx	2019-04-23		I & D	Drainage of Abscess/Debridement | Essential		65	M		Regional Anesthesia: Spinal, Epidural and Regional Blocks	Essential	Essential	1	1		Emergency
1929	PB File	MAMC	Hosp-3	Apr-19	Ortho Em	Ortho	2019-04-24		Removal of implant + Debridement	Drainage of Abscess/Debridement | Essential		30	M		Regional Anesthesia: Spinal, Epidural and Regional Blocks	Non-Essential	Essential	1	1		Emergency
1930	PB File	MAMC	Hosp-3	Apr-19	Surgery Em	GenSx	2019-04-24		Diabetic foot debridement	Drainage of Abscess/Debridement | Essential		55	M		Regional Anesthesia: Spinal, Epidural and Regional Blocks	Non-Essential	Essential	1	1		Emergency
1931	PB File	MAMC	Hosp-3	Apr-19	Ortho Em	Ortho	2019-04-25		I & D (Infected s/t femur)	Drainage of Abscess/Debridement | Essential		52	M		General Anaesthesia	Essential	Essential	1	1		Emergency
1932	PB File	MAMC	Hosp-3	Apr-19	Ortho Em	Ortho	2019-04-25		I And D (Septic Knee Rt)	Drainage of Abscess/Debridement | Essential		1	M		General Anaesthesia	Essential	Essential	1	1		Emergency
1935	PB File	MAMC	Hosp-3	Apr-19	Ortho Em	Ortho	2019-04-30		Debridement & wash (Infected wound (Rt)hip)	Drainage of Abscess/Debridement | Essential		61	F		General Anaesthesia	Non-Essential	Essential	1	1		Emergency
1936	PB File	MAMC	Hosp-3	Apr-19	Ortho Em	Ortho	2019-04-30		Wound wash +Debridement (Infected implant# NOF)	Drainage of Abscess/Debridement | Essential		35	M		General Anaesthesia	Non-Essential	Essential	1	1		Emergency
1937	PB File	MAMC	Hosp-3	Apr-19	Ortho Em	Ortho	2019-04-30		Debridement & Wash (Infected proximal locking site of PFN)	Drainage of Abscess/Debridement | Essential		95	F		Regional Anesthesia: Spinal, Epidural and Regional Blocks	Non-Essential	Essential	1	1		Emergency
1966	PB File	Terna	Hosp-5	Apr-19	General Surgery	GenSx	2019-01-04		INCISION AND DRAINAGE PERIANAL ABSCESS WITH MINOR DEBRIDEMENT	Drainage of Abscess/Debridement | Essential		999	M		Regional Anesthesia: Spinal, Epidural and Regional Blocks	Essential	Essential	1	1		Emergency
1967	PB File	Terna	Hosp-5	Apr-19	General Surgery	GenSx	2019-01-04		SKIN GRAFTING OF LEFT LEG WOUND	Drainage of Abscess/Debridement | Essential		999	M		Regional Anesthesia: Spinal, Epidural and Regional Blocks	Non-Essential	Essential	1	1		Elective
1968	PB File	Terna	Hosp-5	Apr-19	Obstetrics & Gynaecology	ObGy	2019-03-04		RESUTURING OF WOUND GAPE POST-OP LSCS	Drainage of Abscess/Debridement | Essential		999	F		Local anesthesia not supplemented by sedation or GA	Essential	Essential	1	1		Elective
1969	PB File	Terna	Hosp-5	Apr-19	General Surgery	GenSx	2019-09-04		INCISION & DRAINAGE OF PERIANAL ABSCESS	Drainage of Abscess/Debridement | Essential		999	F		Regional Anesthesia: Spinal, Epidural and Regional Blocks	Essential	Essential	1	1		Emergency
1970	PB File	Terna	Hosp-5	Apr-19	General Surgery	GenSx	2019-10-04		I & D FOR PERIANAL ABSCESS	Drainage of Abscess/Debridement | Essential		999	M		Regional Anesthesia: Spinal, Epidural and Regional Blocks	Essential	Essential	1	1		Emergency
1971	PB File	Terna	Hosp-5	Apr-19	General Surgery	GenSx	15/04/2019		I & D BACK WITH DEBRIDEMET	Drainage of Abscess/Debridement | Essential		999	M		General Anaesthesia	Essential	Essential	1	1		Emergency
1972	PB File	Terna	Hosp-5	Apr-19	Orthopaedics	Ortho	22/04/2019		RIGHT FEMUR & KNEE DEBRIDEMENT	Drainage of Abscess/Debridement | Essential		999	M		Regional Anesthesia: Spinal, Epidural and Regional Blocks	Non-Essential	Essential	1	1		Elective
1973	PB File	Terna	Hosp-5	Apr-19	General Surgery	GenSx	23/04/2019		LEFT INGUINO SCROTAL EXPLORATION WITH DEEP I &D	Drainage of Abscess/Debridement | Essential		999	M		Regional Anesthesia: Spinal, Epidural and Regional Blocks	Non-Essential	Essential	1	1		Emergency
1974	PB File	Terna	Hosp-5	Apr-19	General Surgery	GenSx	24/04/2019		DEBRIDEMENT + I&D OF GLUTEAL ABSCESS	Drainage of Abscess/Debridement | Essential		999	F		General Anaesthesia	Non-Essential	Essential	1	1		Emergency
1975	PB File	Terna	Hosp-5	Apr-19	General Surgery	GenSx	27/04/2019		WOUND DEBRIDMENT OF BILATERAL FOOT	Drainage of Abscess/Debridement | Essential		999	M		Local anesthesia not supplemented by sedation or GA	Non-Essential	Essential	1	1		Emergency
1980	PB File	KEM	Hosp-2	Apr-19	General Surgery	GenSx	2019-04-29		Rt Breast I and D	Drainage of Abscess/Debridement | Essential		34	F		General Anaesthesia	Essential	Essential	1	1		Emergency
1999	PB File	KEM	Hosp-2	Apr-19	General Surgery	GenSx	2019-04-01		I and D left hand abscess	Drainage of Abscess/Debridement | Essential		48	M		Regional Anesthesia: Spinal, Epidural and Regional Blocks	Essential	Essential	1	1		Emergency
2000	PB File	KEM	Hosp-2	Apr-19	Orthopedics	Ortho	2019-04-01		I and D sos AKA	Drainage of Abscess/Debridement | Essential		16	F		General Anaesthesia	Non-Essential	Essential	1	1		Emergency
2001	PB File	KEM	Hosp-2	Apr-19	General Surgery	GenSx	2019-04-02		I and D Gluteal abscess	Drainage of Abscess/Debridement | Essential		57	M		Regional Anesthesia: Spinal, Epidural and Regional Blocks	Essential	Essential	1	1		Emergency
2002	PB File	KEM	Hosp-2	Apr-19	General Surgery	GenSx	2019-04-02		Left sided breast abscess	Drainage of Abscess/Debridement | Essential		21	F		Sedation	Essential	Essential	1	1		Emergency
2003	PB File	KEM	Hosp-2	Apr-19	General Surgery	GenSx	2019-04-03		Rt Gluteal abscess	Drainage of Abscess/Debridement | Essential		30	F		Regional Anesthesia: Spinal, Epidural and Regional Blocks	Essential	Essential	1	1		Emergency
2004	PB File	KEM	Hosp-2	Apr-19	General Surgery	GenSx	2019-04-03		Left LL debridemnt	Drainage of Abscess/Debridement | Essential		65	M		Regional Anesthesia: Spinal, Epidural and Regional Blocks	Non-Essential	Essential	1	1		Emergency
2005	PB File	KEM	Hosp-2	Apr-19	General Surgery	GenSx	2019-04-04		Debridement of Rt BK stump	Drainage of Abscess/Debridement | Essential		15	M		General Anaesthesia	Non-Essential	Essential	1	1		Emergency
2006	PB File	KEM	Hosp-2	Apr-19	General Surgery	GenSx	2019-04-04		I and D of rt great toa abscess with nail removal	Drainage of Abscess/Debridement | Essential		23	M		Local anesthesia not supplemented by sedation or GA	Essential	Essential	1	1		Emergency
2007	PB File	KEM	Hosp-2	Apr-19	General Surgery	GenSx	2019-04-05		EEL i/v/o ruptured liver abscess	Exploratory Laparotomy | Essential	Laparotomy	38	M		Regional Anesthesia: Spinal, Epidural and Regional Blocks	Essential	Essential	1	1		Emergency
2008	PB File	KEM	Hosp-2	Apr-19	General Surgery	GenSx	2019-04-05		I and D of neck sebaceous cyst	Drainage of Abscess/Debridement | Essential		45	M		Regional Anesthesia: Spinal, Epidural and Regional Blocks	Essential	Essential	1	1		Emergency
2009	PB File	KEM	Hosp-2	Apr-19	General Surgery	GenSx	2019-04-06		Perinial abscess	Drainage of Abscess/Debridement | Essential		40	M		Regional Anesthesia: Spinal, Epidural and Regional Blocks	Essential	Essential	1	1		Emergency
2010	PB File	KEM	Hosp-2	Apr-19	General Surgery	GenSx	2019-04-06		Left breast I and D of breast abscess	Drainage of Abscess/Debridement | Essential		32	F		Sedation	Essential	Essential	1	1		Emergency
2011	PB File	KEM	Hosp-2	Apr-19	General Surgery	GenSx	2019-04-06		Rt hand abscess I and D	Drainage of Abscess/Debridement | Essential		22	M		Local anesthesia not supplemented by sedation or GA	Essential	Essential	1	1		Emergency
2012	PB File	KEM	Hosp-2	Apr-19	General Surgery	GenSx	2019-04-06		Leg leg cebridement	Drainage of Abscess/Debridement | Essential		35	M		Regional Anesthesia: Spinal, Epidural and Regional Blocks	Non-Essential	Essential	1	1		Emergency
2013	PB File	KEM	Hosp-2	Apr-19	General Surgery	GenSx	2019-04-06		I and D perianal abscess	Drainage of Abscess/Debridement | Essential		60	M		Regional Anesthesia: Spinal, Epidural and Regional Blocks	Essential	Essential	1	1		Emergency
2014	PB File	KEM	Hosp-2	Apr-19	General Surgery	GenSx	2019-04-07		I and D of left thigh abscess	Drainage of Abscess/Debridement | Essential		17	M		Local anesthesia not supplemented by sedation or GA	Essential	Essential	1	1		Emergency
2015	PB File	KEM	Hosp-2	Apr-19	General Surgery	GenSx	2019-04-07		Release Fasciotomy of rt leg	Drainage of Abscess/Debridement | Essential		85	F		General Anaesthesia	Essential	Essential	1	1		Emergency
2016	PB File	KEM	Hosp-2	Apr-19	General Surgery	GenSx	2019-04-07		Rt LL debridement	Drainage of Abscess/Debridement | Essential		16	F		General Anaesthesia	Non-Essential	Essential	1	1		Emergency
2017	PB File	KEM	Hosp-2	Apr-19	General Surgery	GenSx	2019-04-08		I and D of Gluteal abscess	Drainage of Abscess/Debridement | Essential		30	F		Regional Anesthesia: Spinal, Epidural and Regional Blocks	Essential	Essential	1	1		Emergency
2018	PB File	KEM	Hosp-2	Apr-19	General Surgery	GenSx	2019-04-08		I and D perianal abscess	Drainage of Abscess/Debridement | Essential		60	F		Regional Anesthesia: Spinal, Epidural and Regional Blocks	Essential	Essential	1	1		Emergency
2019	PB File	KEM	Hosp-2	Apr-19	General Surgery	GenSx	2019-04-08		I and D of left breast abscess	Drainage of Abscess/Debridement | Essential		22	F		Regional Anesthesia: Spinal, Epidural and Regional Blocks	Essential	Essential	1	1		Emergency
2020	PB File	KEM	Hosp-2	Apr-19	General Surgery	GenSx	2019-04-09		I and D of rt perianal abscess	Drainage of Abscess/Debridement | Essential		40	M		Regional Anesthesia: Spinal, Epidural and Regional Blocks	Essential	Essential	1	1		Emergency
2021	PB File	KEM	Hosp-2	Apr-19	General Surgery	GenSx	2019-04-09		I and D of rt sided axillary abscess	Drainage of Abscess/Debridement | Essential		45	F		Regional Anesthesia: Spinal, Epidural and Regional Blocks	Essential	Essential	1	1		Emergency
2022	PB File	KEM	Hosp-2	Apr-19	General Surgery	GenSx	2019-04-09		I and D of rt gluteal abscess	Drainage of Abscess/Debridement | Essential		49	F		Local anesthesia not supplemented by sedation or GA	Essential	Essential	1	1		Emergency
2023	PB File	KEM	Hosp-2	Apr-19	General Surgery	GenSx	2019-04-09		Left leg debridement	Drainage of Abscess/Debridement | Essential		52	M		Regional Anesthesia: Spinal, Epidural and Regional Blocks	Non-Essential	Essential	1	1		Emergency
2024	PB File	KEM	Hosp-2	Apr-19	General Surgery	GenSx	2019-04-09		Debridement of Rt diabetic foot	Drainage of Abscess/Debridement | Essential		52	M		General Anaesthesia	Non-Essential	Essential	1	1		Emergency
2025	PB File	KEM	Hosp-2	Apr-19	General Surgery	GenSx	2019-04-09		I and D of rt arm abscess	Drainage of Abscess/Debridement | Essential		29	M		General Anaesthesia	Essential	Essential	1	1		Emergency
2026	PB File	KEM	Hosp-2	Apr-19	General Surgery	GenSx	2019-04-09		I and D SOS Debridement of rt thigh abscess	Drainage of Abscess/Debridement | Essential		60	M		Regional Anesthesia: Spinal, Epidural and Regional Blocks	Non-Essential	Essential	1	1		Emergency
2027	PB File	KEM	Hosp-2	Apr-19	General Surgery	GenSx	2019-04-10		I and D of rt hand and rt thigh abscess	Drainage of Abscess/Debridement | Essential		12	F		Sedation	Essential	Essential	1	1		Emergency
2028	PB File	KEM	Hosp-2	Apr-19	General Surgery	GenSx	2019-04-10		Debridement of RT LL	Drainage of Abscess/Debridement | Essential		16	F		General Anaesthesia	Non-Essential	Essential	1	1		Emergency
2029	PB File	KEM	Hosp-2	Apr-19	General Surgery	GenSx	2019-04-10		Debridement of rt leg non healing ulcer	Drainage of Abscess/Debridement | Essential		46	F		Local anesthesia not supplemented by sedation or GA	Non-Essential	Essential	1	1		Emergency
2030	PB File	KEM	Hosp-2	Apr-19	General Surgery	GenSx	2019-04-10		Left breast debridement	Drainage of Abscess/Debridement | Essential		65	F		Local anesthesia not supplemented by sedation or GA	Essential	Essential	1	1		Emergency
2031	PB File	KEM	Hosp-2	Apr-19	General Surgery	GenSx	2019-04-11		I and D of perianal abscess	Drainage of Abscess/Debridement | Essential		30	f		Regional Anesthesia: Spinal, Epidural and Regional Blocks	Essential	Essential	1	1		Emergency
2032	PB File	KEM	Hosp-2	Apr-19	General Surgery	GenSx	2019-04-11		I and D of XXXX abscess	Drainage of Abscess/Debridement | Essential		51	M		Regional Anesthesia: Spinal, Epidural and Regional Blocks	Essential	Essential	1	1		Emergency
2033	PB File	KEM	Hosp-2	Apr-19	Orthopedics	Ortho	2019-04-11		DEbridement SOS BKA	Drainage of Abscess/Debridement | Essential		52	M		Regional Anesthesia: Spinal, Epidural and Regional Blocks	Non-Essential	Essential	1	1		Emergency
2034	PB File	KEM	Hosp-2	Apr-19	Orthopedics	Ortho	2019-04-12		Debridement SOS rt LL	Drainage of Abscess/Debridement | Essential		60	M		Regional Anesthesia: Spinal, Epidural and Regional Blocks	Non-Essential	Essential	1	1		Emergency
2035	PB File	KEM	Hosp-2	Apr-19	General Surgery	GenSx	2019-04-12		I and D of previous abd drainage	Drainage of Abscess/Debridement | Essential		75	M		Local anesthesia not supplemented by sedation or GA	Non-Essential	Essential	1	1		Emergency
2036	PB File	KEM	Hosp-2	Apr-19	General Surgery	GenSx	2019-04-13		I and D Abscess	Drainage of Abscess/Debridement | Essential		41	M		Not available	Essential	Essential	1	1		Emergency
2037	PB File	KEM	Hosp-2	Apr-19	General Surgery	GenSx	2019-04-13		I and D of Gluteal abscess	Drainage of Abscess/Debridement | Essential		18	F		Regional Anesthesia: Spinal, Epidural and Regional Blocks	Essential	Essential	1	1		Emergency
2038	PB File	KEM	Hosp-2	Apr-19	General Surgery	GenSx	2019-04-13		I and D of left gluteal abscess	Drainage of Abscess/Debridement | Essential		51	M		Regional Anesthesia: Spinal, Epidural and Regional Blocks	Essential	Essential	1	1	SA	Emergency
2039	PB File	KEM	Hosp-2	Apr-19	Orthopedics	Ortho	2019-04-14		Debridement of rt EMT	Drainage of Abscess/Debridement | Essential		55	M		Local anesthesia not supplemented by sedation or GA	Non-Essential	Essential	1	1		Emergency
2040	PB File	KEM	Hosp-2	Apr-19	General Surgery	GenSx	2019-04-15		Left axilla abscess	Drainage of Abscess/Debridement | Essential		42	F		Local anesthesia not supplemented by sedation or GA	Essential	Essential	1	1		Emergency
2041	PB File	KEM	Hosp-2	Apr-19	General Surgery	GenSx	2019-04-15		I and D of left scalp abscess	Drainage of Abscess/Debridement | Essential		61	F		Sedation	Essential	Essential	1	1		Emergency
2042	PB File	KEM	Hosp-2	Apr-19	Orthopedics	Ortho	2019-04-15		Refreshment of rt BK wound	Drainage of Abscess/Debridement | Essential		70	M		Sedation	Non-Essential	Essential	1	1		Emergency
2043	PB File	KEM	Hosp-2	Apr-19	General Surgery	GenSx	2019-04-16		Relase of left UL SOS debridement	Drainage of Abscess/Debridement | Essential		64	M		General Anaesthesia	Non-Essential	Essential	1	1		Emergency
2044	PB File	KEM	Hosp-2	Apr-19	General Surgery	GenSx	2019-04-16		Left leg debridement of excision of thigh	Drainage of Abscess/Debridement | Essential		18	F		Regional Anesthesia: Spinal, Epidural and Regional Blocks	Non-Essential	Essential	1	1		Emergency
2045	PB File	KEM	Hosp-2	Apr-19	General Surgery	GenSx	2019-04-17		Left hand ulcer debridement	Drainage of Abscess/Debridement | Essential		18	M		Regional Anesthesia: Spinal, Epidural and Regional Blocks	Non-Essential	Essential	1	1		Emergency
2046	PB File	KEM	Hosp-2	Apr-19	General Surgery	GenSx	2019-04-17		Debridement XXXX gangrene	Drainage of Abscess/Debridement | Essential		70	M		Regional Anesthesia: Spinal, Epidural and Regional Blocks	Non-Essential	Essential	1	1		Emergency
2047	PB File	KEM	Hosp-2	Apr-19	General Surgery	GenSx	2019-04-17		Left leg cellulitis fasciotomy	Drainage of Abscess/Debridement | Essential		54	F		Regional Anesthesia: Spinal, Epidural and Regional Blocks	Essential	Essential	1	1		Emergency
2048	PB File	KEM	Hosp-2	Apr-19	General Surgery	GenSx	2019-04-18		I and D of Fxxxxxxx gangrene	Drainage of Abscess/Debridement | Essential		18	M		General Anaesthesia	Non-Essential	Essential	1	1		Emergency
2049	PB File	KEM	Hosp-2	Apr-19	General Surgery	GenSx	2019-04-18		Gluteal abscess	Drainage of Abscess/Debridement | Essential		48	F		Regional Anesthesia: Spinal, Epidural and Regional Blocks	Essential	Essential	1	1		Emergency
2050	PB File	KEM	Hosp-2	Apr-19	General Surgery	GenSx	2019-04-18		I and D of submucous abscess	Drainage of Abscess/Debridement | Essential		29	F		Sedation	Essential	Essential	1	1		Emergency
2051	PB File	KEM	Hosp-2	Apr-19	General Surgery	GenSx	2019-04-18		I and D Gluteal abscess	Drainage of Abscess/Debridement | Essential		48	M		Regional Anesthesia: Spinal, Epidural and Regional Blocks	Essential	Essential	1	1		Emergency
2052	PB File	KEM	Hosp-2	Apr-19	General Surgery	GenSx	2019-04-18		I and D perianal abscess	Drainage of Abscess/Debridement | Essential		52	M		Regional Anesthesia: Spinal, Epidural and Regional Blocks	Essential	Essential	1	1		Emergency
2053	PB File	KEM	Hosp-2	Apr-19	Orthopedics	Ortho	2019-04-18		Rt little toe debridement	Drainage of Abscess/Debridement | Essential		52	M		Regional Anesthesia: Spinal, Epidural and Regional Blocks	Non-Essential	Essential	1	1		Emergency
2054	PB File	KEM	Hosp-2	Apr-19	General Surgery	GenSx	2019-04-18		I and D of rt thigh abscess	Drainage of Abscess/Debridement | Essential		12	M		Sedation	Essential	Essential	1	1		Emergency
2055	PB File	KEM	Hosp-2	Apr-19	General Surgery	GenSx	2019-04-19		I and D of thigh abscess	Drainage of Abscess/Debridement | Essential		28	F		Regional Anesthesia: Spinal, Epidural and Regional Blocks	Essential	Essential	1	1		Emergency
2056	PB File	KEM	Hosp-2	Apr-19	General Surgery	GenSx	2019-04-19		Debridement of LL SOS Fasciotmoy	Drainage of Abscess/Debridement | Essential		55	M		Regional Anesthesia: Spinal, Epidural and Regional Blocks	Essential	Essential	1	1		Emergency
2057	PB File	KEM	Hosp-2	Apr-19	General Surgery	GenSx	2019-04-19		I and D of Gluteal abscess	Drainage of Abscess/Debridement | Essential		50	M		General Anaesthesia	Essential	Essential	1	1		Emergency
2058	PB File	KEM	Hosp-2	Apr-19	General Surgery	GenSx	2019-04-20		Debridement of ulcer over let foot dosser	Drainage of Abscess/Debridement | Essential		18	M		Local anesthesia not supplemented by sedation or GA	Non-Essential	Essential	1	1		Emergency
2059	PB File	KEM	Hosp-2	Apr-19	General Surgery	GenSx	2019-04-20		Left foot debridement	Drainage of Abscess/Debridement | Essential		68	M		Local anesthesia not supplemented by sedation or GA	Non-Essential	Essential	1	1		Emergency
2060	PB File	KEM	Hosp-2	Apr-19	General Surgery	GenSx	2019-04-22		Rt Foot debridement	Drainage of Abscess/Debridement | Essential		74	M		Regional Anesthesia: Spinal, Epidural and Regional Blocks	Non-Essential	Essential	1	1		Emergency
2061	PB File	KEM	Hosp-2	Apr-19	Orthopedics	Ortho	2019-04-23		Rt Foot rt great toe debridement	Drainage of Abscess/Debridement | Essential		62	M		Regional Anesthesia: Spinal, Epidural and Regional Blocks	Non-Essential	Essential	1	1		Emergency
2062	PB File	KEM	Hosp-2	Apr-19	Orthopedics	Ortho	2019-04-23		Debridement of heel wound	Drainage of Abscess/Debridement | Essential		67	M		Regional Anesthesia: Spinal, Epidural and Regional Blocks	Non-Essential	Essential	1	1		Emergency
2063	PB File	KEM	Hosp-2	Apr-19	General Surgery	GenSx	2019-04-23		I and D of Gluteal abscess	Drainage of Abscess/Debridement | Essential		35	M		Regional Anesthesia: Spinal, Epidural and Regional Blocks	Essential	Essential	1	1		Emergency
2064	PB File	KEM	Hosp-2	Apr-19	General Surgery	GenSx	2019-04-23		Left leg debridement and release	Drainage of Abscess/Debridement | Essential		60	M		Regional Anesthesia: Spinal, Epidural and Regional Blocks	Non-Essential	Essential	1	1		Emergency
2065	PB File	KEM	Hosp-2	Apr-19	General Surgery	GenSx	2019-04-23		Left hand thumb swelling I and D	Drainage of Abscess/Debridement | Essential		68	M		Regional Anesthesia: Spinal, Epidural and Regional Blocks	Essential	Essential	1	1		Emergency
2066	PB File	KEM	Hosp-2	Apr-19	General Surgery	GenSx	2019-04-24		B/L perianal abscess	Drainage of Abscess/Debridement | Essential		38	M		General Anaesthesia	Essential	Essential	1	1		Emergency
2067	PB File	KEM	Hosp-2	Apr-19	General Surgery	GenSx	2019-04-24		I and D of abd wall abscess	Drainage of Abscess/Debridement | Essential		56	M		General Anaesthesia	Essential	Essential	1	1		Emergency
2068	PB File	KEM	Hosp-2	Apr-19	General Surgery	GenSx	2019-04-24		I and D of back carbuncle	Drainage of Abscess/Debridement | Essential		46	F		General Anaesthesia	Essential	Essential	1	1		Emergency
2069	PB File	KEM	Hosp-2	Apr-19	General Surgery	GenSx	2019-04-25		I and D of rt xxxx abscess	Drainage of Abscess/Debridement | Essential		19	M		Local anesthesia not supplemented by sedation or GA	Essential	Essential	1	1		Emergency
2070	PB File	KEM	Hosp-2	Apr-19	General Surgery	GenSx	2019-04-25		Left leg cellulitis	Drainage of Abscess/Debridement | Essential		52	M		Regional Anesthesia: Spinal, Epidural and Regional Blocks	Non-Essential	Essential	1	1		Emergency
2071	PB File	KEM	Hosp-2	Apr-19	General Surgery	GenSx	2019-04-25		B/L LL Debridement	Drainage of Abscess/Debridement | Essential		47	M		General Anaesthesia	Non-Essential	Essential	1	1		Emergency
2072	PB File	KEM	Hosp-2	Apr-19	General Surgery	GenSx	2019-04-26		I and D chest wall abscess	Drainage of Abscess/Debridement | Essential		40	F		Sedation	Essential	Essential	1	1		Emergency
2073	PB File	KEM	Hosp-2	Apr-19	Orthopedics	Ortho	2019-04-26		Rt leg debridement	Drainage of Abscess/Debridement | Essential		60	F		Regional Anesthesia: Spinal, Epidural and Regional Blocks	Non-Essential	Essential	1	1		Emergency
2074	PB File	KEM	Hosp-2	Apr-19	General Surgery	GenSx	2019-04-25		Perneal wound suturing under SA	Drainage of Abscess/Debridement | Essential		18	M		Regional Anesthesia: Spinal, Epidural and Regional Blocks	Non-Essential	Essential	1	1		Emergency
2075	PB File	KEM	Hosp-2	Apr-19	General Surgery	GenSx	2019-04-25		Debridement Left LL	Drainage of Abscess/Debridement | Essential		70	F		General Anaesthesia	Non-Essential	Essential	1	1		Emergency
2076	PB File	KEM	Hosp-2	Apr-19	General Surgery	GenSx	2019-04-26		Rt leg debridement	Drainage of Abscess/Debridement | Essential		45	M		Regional Anesthesia: Spinal, Epidural and Regional Blocks	Non-Essential	Essential	1	1		Emergency
2077	PB File	KEM	Hosp-2	Apr-19	General Surgery	GenSx	2019-04-27		I and D Debridement of gluteal abscess	Drainage of Abscess/Debridement | Essential		33	M		Regional Anesthesia: Spinal, Epidural and Regional Blocks	Essential	Essential	1	1		Emergency
2078	PB File	KEM	Hosp-2	Apr-19	General Surgery	GenSx	2019-04-27		Rt leg BK stump debridement	Drainage of Abscess/Debridement | Essential		58	M		General Anaesthesia	Non-Essential	Essential	1	1		Emergency
2079	PB File	KEM	Hosp-2	Apr-19	General Surgery	GenSx	2019-04-27		I and D of knee abscess	Drainage of Abscess/Debridement | Essential		33	M		Regional Anesthesia: Spinal, Epidural and Regional Blocks	Essential	Essential	1	1		Emergency
2080	PB File	KEM	Hosp-2	Apr-19	General Surgery	GenSx	2019-04-27		Rt Foot debridement and fasciotomy	Drainage of Abscess/Debridement | Essential		73	M		Regional Anesthesia: Spinal, Epidural and Regional Blocks	Essential	Essential	1	1		Emergency
2081	PB File	KEM	Hosp-2	Apr-19	General Surgery	GenSx	2019-04-27		I and D of Gluteal abscess	Drainage of Abscess/Debridement | Essential		25	M		Regional Anesthesia: Spinal, Epidural and Regional Blocks	Essential	Essential	1	1		Emergency
2082	PB File	KEM	Hosp-2	Apr-19	General Surgery	GenSx	2019-04-27		Left LL fasciotomy	Drainage of Abscess/Debridement | Essential		30	M		Regional Anesthesia: Spinal, Epidural and Regional Blocks	Essential	Essential	1	1		Emergency
2083	PB File	KEM	Hosp-2	Apr-19	General Surgery	GenSx	2019-04-27		Left LL debridement	Drainage of Abscess/Debridement | Essential		30	M		Regional Anesthesia: Spinal, Epidural and Regional Blocks	Non-Essential	Essential	1	1		Emergency
2084	PB File	KEM	Hosp-2	Apr-19	General Surgery	GenSx	2019-04-28		Debridement of rt ankle abscess	Drainage of Abscess/Debridement | Essential		65	M		General Anaesthesia	Essential	Essential	1	1		Emergency
2085	PB File	KEM	Hosp-2	Apr-19	General Surgery	GenSx	2019-04-28		I and D of left axillary abscess	Drainage of Abscess/Debridement | Essential		22	M		Sedation	Essential	Essential	1	1		Emergency
2086	PB File	KEM	Hosp-2	Apr-19	General Surgery	GenSx	2019-04-28		Left LL debridement	Drainage of Abscess/Debridement | Essential		67	M		Local anesthesia not supplemented by sedation or GA	Non-Essential	Essential	1	1		Emergency
2087	PB File	KEM	Hosp-2	Apr-19	General Surgery	GenSx	2019-04-28		Debridement of multiple carbuncle	Drainage of Abscess/Debridement | Essential		55	M		General Anaesthesia	Essential	Essential	1	1		Emergency
2088	PB File	KEM	Hosp-2	Apr-19	General Surgery	GenSx	2019-04-28		I and D of perianal abscess	Drainage of Abscess/Debridement | Essential		22	M		Regional Anesthesia: Spinal, Epidural and Regional Blocks	Essential	Essential	1	1		Emergency
2089	PB File	KEM	Hosp-2	Apr-19	General Surgery	GenSx	2019-04-29		Carbuncle xxxx	Drainage of Abscess/Debridement | Essential		42	M		General Anaesthesia	Essential	Essential	1	1		Emergency
2090	PB File	KEM	Hosp-2	Apr-19	General Surgery	GenSx	2019-04-29		Perianal abscess	Drainage of Abscess/Debridement | Essential		26	M		Regional Anesthesia: Spinal, Epidural and Regional Blocks	Essential	Essential	1	1		Emergency
2091	PB File	KEM	Hosp-2	Apr-19	General Surgery	GenSx	2019-04-29		Left foot debridement	Drainage of Abscess/Debridement | Essential		60	M		Regional Anesthesia: Spinal, Epidural and Regional Blocks	Non-Essential	Essential	1	1		Emergency
2092	PB File	KEM	Hosp-2	Apr-19	General Surgery	GenSx	2019-04-29		Rt Breast I and D	Drainage of Abscess/Debridement | Essential		34	F		Regional Anesthesia: Spinal, Epidural and Regional Blocks	Essential	Essential	1	1		Emergency
2093	PB File	KEM	Hosp-2	Apr-19	General Surgery	GenSx	2019-04-25		I and D of carbuncle of neck	Drainage of Abscess/Debridement | Essential		68	999		Local anesthesia not supplemented by sedation or GA	Essential	Essential	1	1		Emergency
2094	PB File	KEM	Hosp-2	Apr-19	General Surgery	GenSx	2019-04-22		Intraabdominal abscess	Drainage of Abscess/Debridement | Essential		70	999		Local anesthesia not supplemented by sedation or GA	Non-Essential	Essential	1	1		Emergency
2095	PB File	KEM	Hosp-2	Apr-19	OBGY	ObGy	2019-04-11		Wound Debridement	Drainage of Abscess/Debridement | Essential		28	F		Local anesthesia not supplemented by sedation or GA	Non-Essential	Essential	1	1		Emergency
2096	PB File	KEM	Hosp-2	Apr-19	OBGY	ObGy	2019-04-17		Incision drainage and Bartholin's abscess with marsupialisation of cyst wall	Drainage of Abscess/Debridement | Essential		26	F		Sedation	Essential	Essential	1	1		Emergency
2100	PB File	KEM	Hosp-2	Apr-19	Ortho	Ortho	2019-04-01		Right septic knee $$	Drainage of Abscess/Debridement | Essential		14	F		General Anaesthesia	Essential	Essential	1	1		Emergency
2101	PB File	KEM	Hosp-2	Apr-19	Ortho	Ortho	2019-04-04		Right femur osteomyelitis wound wash	Drainage of Abscess/Debridement | Essential		35	M		Regional Anesthesia: Spinal, Epidural and Regional Blocks	Essential	Essential	1	1		Emergency
2102	PB File	KEM	Hosp-2	Apr-19	Ortho	Ortho	2019-04-05		Right foot $ debridement	Drainage of Abscess/Debridement | Essential		20	F		General Anaesthesia	Non-Essential	Essential	1	1		Emergency
2103	PB File	KEM	Hosp-2	Apr-19	Ortho	Ortho	2019-04-07		Debridement of right LL	Drainage of Abscess/Debridement | Essential		21	M		Regional Anesthesia: Spinal, Epidural and Regional Blocks	Non-Essential	Essential	1	1		Emergency
2104	PB File	KEM	Hosp-2	Apr-19	Ortho	Ortho	2019-04-11		Left LL wound wash	Drainage of Abscess/Debridement | Essential		59	M		Regional Anesthesia: Spinal, Epidural and Regional Blocks	Non-Essential	Essential	1	1		Emergency
2105	PB File	KEM	Hosp-2	Apr-19	Ortho	Ortho	2019-04-22		Left bipolar $ arthroplactic wound wash	Drainage of Abscess/Debridement | Essential		50	F		Regional Anesthesia: Spinal, Epidural and Regional Blocks	Non-Essential	Essential	1	1		Emergency
2106	PB File	BARC	Hosp-1	Apr-19	Surgical	GenSx	15-04-2019		Drainage of superficial abscess	Drainage of Abscess/Debridement | Essential		74	F		Regional Anesthesia: Spinal, Epidural and Regional Blocks	Essential	Essential	1	1		Emergency
2107	PB File	BARC	Hosp-1	Apr-19	Surgical	GenSx	30-04-2019		Drainage of superficial abscess	Drainage of Abscess/Debridement | Essential		50	F		Regional Anesthesia: Spinal, Epidural and Regional Blocks	Essential	Essential	1	1		Emergency
2133	PB File	Manipal	Hosp-4	Apr-19	Orthopaedics	Ortho	2019-02-04		Debridement hip joint, antibiotics and spacer application for severe osteoarthritis left hip , septic sequelae	Drainage of Abscess/Debridement | Essential		43	M		Regional Anesthesia: Spinal, Epidural and Regional Blocks	Non-Essential	Essential	1	1		Emergency
2134	PB File	Manipal	Hosp-4	Apr-19	GeneraL surgery	GenSx	2019-06-04		Right breast abscess Incision and Drainage	Drainage of Abscess/Debridement | Essential		37	F		Not available	Essential	Essential	1	1		Emergency
2135	PB File	Manipal	Hosp-4	Apr-19	GeneraL surgery	GenSx	2019-09-04		Incision and Drainage	Drainage of Abscess/Debridement | Essential		56	M		General Anaesthesia	Essential	Essential	1	1		Emergency
2136	PB File	Manipal	Hosp-4	Apr-19	GeneraL surgery	GenSx	2019-12-04		Debridement right foot	Drainage of Abscess/Debridement | Essential		83	M		Not available	Non-Essential	Essential	1	1		Emergency
2137	PB File	Manipal	Hosp-4	Apr-19	GeneraL surgery	GenSx	19/4/2019		Debridement of the wound right leg	Drainage of Abscess/Debridement | Essential		70	F		General Anaesthesia	Non-Essential	Essential	1	1		Emergency
2138	PB File	Manipal	Hosp-4	Apr-19	GeneraL surgery	GenSx	27/4/2019		Incision and Drainage	Drainage of Abscess/Debridement | Essential		66	F		General Anaesthesia	Essential	Essential	1	1		Emergency
2192	PB File	MAMC	Hosp-3	Apr-19	Gen.Surgery	GenSx	2019-02-04		Exp. Laparotomy for Obstruction	Exploratory Laparotomy | Essential	Laparotomy	33	M		General Anaesthesia	Essential	Essential	1	1		Emergency
2193	PB File	MAMC	Hosp-3	Apr-19	Gen.Surgery	GenSx	2019-04-13		Exp Laparotomy for Biliary peritonitis	Exploratory Laparotomy | Essential	Laparotomy	82	F		General Anaesthesia	Essential	Essential	1	1		Elective
2194	PB File	MAMC	Hosp-3	Apr-19	Surgery Em/Ortho Em	GenSx	2019-01-04		Exp laprotomy	Exploratory Laparotomy | Essential	Laparotomy	50	M		General Anaesthesia	Essential	Essential	1	1		Emergency
2195	PB File	MAMC	Hosp-3	Apr-19	Surgery Em	GenSx	2019-01-04		Exp laprotomy	Exploratory Laparotomy | Essential	Laparotomy	36	M		General Anaesthesia	Essential	Essential	1	1		Emergency
2196	PB File	MAMC	Hosp-3	Apr-19	Surgery Em	GenSx	2019-02-04		Re-Exp lap and Lavage (for intra abbomial Collections)	Exploratory Laparotomy | Essential	Laparotomy	30	M		General Anaesthesia	Essential	Essential	1	1		Emergency
2198	PB File	MAMC	Hosp-3	Apr-19	Surgery Em	GenSx	2019-02-04		Exp laprotomy & DU perforation repair	Exploratory Laparotomy | Essential	Laparotomy	41	M		General Anaesthesia	Essential	Essential	1	1		Emergency
2199	PB File	MAMC	Hosp-3	Apr-19	Surgery Em	GenSx	2019-03-04		Exp lap	Exploratory Laparotomy | Essential	Laparotomy	40	F		General Anaesthesia	Essential	Essential	1	1		Emergency
2200	PB File	MAMC	Hosp-3	Apr-19	Surgery Em	GenSx	2019-03-04		Exp laprotomy	Exploratory Laparotomy | Essential	Laparotomy	58	M		General Anaesthesia	Essential	Essential	1	1		Emergency
2201	PB File	MAMC	Hosp-3	Apr-19	Surgery Em	GenSx	2019-03-04		Exp lap	Exploratory Laparotomy | Essential	Laparotomy	28	M		General Anaesthesia	Essential	Essential	1	1		Emergency
2202	PB File	MAMC	Hosp-3	Apr-19	Surgery Em	GenSx	2019-03-04		Exp laparotomy + ileal repair (perforation peritonitis	Exploratory Laparotomy | Essential	Laparotomy	25	M		General Anaesthesia	Essential	Essential	1	1		Emergency
2204	PB File	MAMC	Hosp-3	Apr-19	Surgery Em	GenSx	2019-04-04		Exp Laparotomy + Lavage (penetrating injury)	Exploratory Laparotomy | Essential	Laparotomy	20	M		General Anaesthesia	Essential	Essential	1	1		Emergency
2205	PB File	MAMC	Hosp-3	Apr-19	Surgery Em	GenSx	2019-04-04		Exp laprotomy & DU perforation repair	Exploratory Laparotomy | Essential	Laparotomy	35	F		General Anaesthesia	Essential	Essential	1	1		Emergency
2206	PB File	MAMC	Hosp-3	Apr-19	Surgery Em	GenSx	2019-04-04		Exp laprotomy (intestinal Obstruction)	Exploratory Laparotomy | Essential	Laparotomy	45	M		General Anaesthesia	Essential	Essential	1	1		Emergency
2207	PB File	MAMC	Hosp-3	Apr-19	Surgery Em	GenSx	2019-05-04		Exp laprotomy & ileostomy	Exploratory Laparotomy | Essential	Laparotomy	22	M		General Anaesthesia	Essential	Essential	1	1		Emergency
2208	PB File	MAMC	Hosp-3	Apr-19	Surgery Em	GenSx	2019-05-04		Exp laprotomy & RA of perforated segment	Exploratory Laparotomy | Essential	Laparotomy	30	F		General Anaesthesia	Essential	Essential	1	1		Emergency
2209	PB File	MAMC	Hosp-3	Apr-19	Surgery Em	GenSx	2019-06-04		Exp laprotomy & ileostomy	Exploratory Laparotomy | Essential	Laparotomy	25	M		General Anaesthesia	Essential	Essential	1	1		Emergency
2210	PB File	MAMC	Hosp-3	Apr-19	Surgery Em	GenSx	2019-06-04		Exp Laparotomy + Lavage (rupturd liver abscess)	Exploratory Laparotomy | Essential	Laparotomy	31	M		General Anaesthesia	Essential	Essential	1	1		Emergency
2212	PB File	MAMC	Hosp-3	Apr-19	Surgery Em	GenSx	2019-07-04		Exp laparotomy (perforation peritonitis)	Exploratory Laparotomy | Essential	Laparotomy	34	M		General Anaesthesia	Essential	Essential	1	1		Emergency
2213	PB File	MAMC	Hosp-3	Apr-19	Surgery Em	GenSx	2019-07-04		Exp lap and proceed	Exploratory Laparotomy | Essential	Laparotomy	26	F		General Anaesthesia	Essential	Essential	1	1		Emergency
2214	PB File	MAMC	Hosp-3	Apr-19	Surgery Em	GenSx	2019-08-04		Exp lap	Exploratory Laparotomy | Essential	Laparotomy	50	F		General Anaesthesia	Essential	Essential	1	1		Emergency
2216	PB File	MAMC	Hosp-3	Apr-19	Surgery Em	GenSx	2019-08-04		Exp lap and proceed	Exploratory Laparotomy | Essential	Laparotomy	16	M		General Anaesthesia	Essential	Essential	1	1		Emergency
2217	PB File	MAMC	Hosp-3	Apr-19	Surgery Em	GenSx	2019-04-04		Exp laprotomy (intussusception)	Exploratory Laparotomy | Essential	Laparotomy	35	M		General Anaesthesia	Essential	Essential	1	1		Emergency
2218	PB File	MAMC	Hosp-3	Apr-19	Surgery Em	GenSx	2019-09-04		Exp Lap & Splenectomy	Exploratory Laparotomy | Essential	Laparotomy	40	M		General Anaesthesia	Essential	Essential	1	1		Emergency
2220	PB File	MAMC	Hosp-3	Apr-19	Surgery Em	GenSx	2019-10-04		Exp lap & Colostomy	Exploratory Laparotomy | Essential	Laparotomy	52	M		General Anaesthesia	Essential	Essential	1	1		Emergency
2221	PB File	MAMC	Hosp-3	Apr-19	Surgery Em	GenSx	2019-10-04		Exp Lap (Perforation Peritonitis)	Exploratory Laparotomy | Essential	Laparotomy	35	M		General Anaesthesia	Essential	Essential	1	1		Emergency
2222	PB File	MAMC	Hosp-3	Apr-19	Surgery Em	GenSx	2019-10-04		Exp lap and RA	Exploratory Laparotomy | Essential	Laparotomy	16	F		General Anaesthesia	Essential	Essential	1	1		Emergency
2223	PB File	MAMC	Hosp-3	Apr-19	Surgery Em	GenSx	2019-10-04		Exp lap and proceed	Exploratory Laparotomy | Essential	Laparotomy	65	F		General Anaesthesia	Essential	Essential	1	1		Emergency
2224	PB File	MAMC	Hosp-3	Apr-19	Surgery Em	GenSx	2019-10-04		Exp lap and RA (Hemoperitoneum)	Exploratory Laparotomy | Essential	Laparotomy	35	M		General Anaesthesia	Essential	Essential	1	1		Emergency
2225	PB File	MAMC	Hosp-3	Apr-19	Surgery Em	GenSx	2019-10-04		Exp lap (Kochs Abdomen)	Exploratory Laparotomy | Essential	Laparotomy	22	F		General Anaesthesia	Essential	Essential	1	1		Emergency
2226	PB File	MAMC	Hosp-3	Apr-19	Surgery Em	GenSx	2019-11-04		Exp lap (intestinal obstruction)	Exploratory Laparotomy | Essential	Laparotomy	42	M		General Anaesthesia	Essential	Essential	1	1		Emergency
2227	PB File	MAMC	Hosp-3	Apr-19	Surgery Em	GenSx	2019-11-04		Exp lap and RA (RTA)	Exploratory Laparotomy | Essential	Laparotomy	32	M		General Anaesthesia	Essential	Essential	1	1		Emergency
2228	PB File	MAMC	Hosp-3	Apr-19	Surgery Em	GenSx	2019-11-04		Exp lap (malignant intestinal obstruction)	Exploratory Laparotomy | Essential	Laparotomy	73	M		General Anaesthesia	Essential	Essential	1	1		Emergency
2229	PB File	MAMC	Hosp-3	Apr-19	Surgery Em	GenSx	2019-12-04		Exp lap & Splenectomy (RTA)	Exploratory Laparotomy | Essential	Laparotomy	38	M		General Anaesthesia	Essential	Essential	1	1		Emergency
2232	PB File	MAMC	Hosp-3	Apr-19	Surgery Em	GenSx	2019-12-04		Exp Laparotomy + Lavage (rupturd liver abscess)	Exploratory Laparotomy | Essential	Laparotomy	28	M		General Anaesthesia	Essential	Essential	1	1		Emergency
2233	PB File	MAMC	Hosp-3	Apr-19	Surgery Em	GenSx	2019-12-04		Exp laparotomy + ileostomy (Perforation Peritonitis)	Exploratory Laparotomy | Essential	Laparotomy	18	F		General Anaesthesia	Essential	Essential	1	1		Emergency
2234	PB File	MAMC	Hosp-3	Apr-19	Surgery Em	GenSx	2019-12-04		Exp lap (Kochs Abdomen)	Exploratory Laparotomy | Essential	Laparotomy	13	M		General Anaesthesia	Essential	Essential	1	1		Emergency
2235	PB File	MAMC	Hosp-3	Apr-19	Surgery Em	GenSx	2019-04-13		Exp laparotomy + ileostomy (Perforation Peritonitis)	Exploratory Laparotomy | Essential	Laparotomy	62	F		General Anaesthesia	Essential	Essential	1	1		Emergency
2236	PB File	MAMC	Hosp-3	Apr-19	Surgery Em	GenSx	2019-04-13		Exp laparotomy + Adhesiolysis (intestinal obstruction)	Exploratory Laparotomy | Essential	Laparotomy	65	M		General Anaesthesia	Essential	Essential	1	1		Emergency
2237	PB File	MAMC	Hosp-3	Apr-19	Surgery Em	GenSx	2019-04-13		Exp laparotomy + RA (Ileo-colic intussusception)	Exploratory Laparotomy | Essential	Laparotomy	60	F		General Anaesthesia	Essential	Essential	1	1		Emergency
2238	PB File	MAMC	Hosp-3	Apr-19	Surgery Em	GenSx	2019-04-13		Exp laparotomy (Acute intestinal obstruction)	Exploratory Laparotomy | Essential	Laparotomy	39	M		General Anaesthesia	Essential	Essential	1	1		Emergency
2239	PB File	MAMC	Hosp-3	Apr-19	Surgery Em	GenSx	2019-04-13		Exp lap and proceed	Exploratory Laparotomy | Essential	Laparotomy	30	M		General Anaesthesia	Essential	Essential	1	1		Emergency
2240	PB File	MAMC	Hosp-3	Apr-19	Surgery Em	GenSx	2019-04-13		Exp Lap (Perforation Peritonitis)	Exploratory Laparotomy | Essential	Laparotomy	42	F		General Anaesthesia	Essential	Essential	1	1		Emergency
2241	PB File	MAMC	Hosp-3	Apr-19	Surgery Em	GenSx	2019-04-14		Exp laprotomy (Intestinal Obstruction)	Exploratory Laparotomy | Essential	Laparotomy	35	M		General Anaesthesia	Essential	Essential	1	1		Emergency
2243	PB File	MAMC	Hosp-3	Apr-19	Surgery Em	GenSx	2019-04-14		Exp Lap (Perforation Peritonitis)	Exploratory Laparotomy | Essential	Laparotomy	25	M		General Anaesthesia	Essential	Essential	1	1		Emergency
2244	PB File	MAMC	Hosp-3	Apr-19	Surgery Em	GenSx	2019-04-14		Exp Lap (Perforation Peritonitis)	Exploratory Laparotomy | Essential	Laparotomy	32	M		General Anaesthesia	Essential	Essential	1	1		Emergency
2245	PB File	MAMC	Hosp-3	Apr-19	Surgery Em	GenSx	2019-04-14		Exp lap & Stoma (intestinal obstruction- Ca rectum)	Exploratory Laparotomy | Essential	Laparotomy	54	M		General Anaesthesia	Essential	Essential	1	1		Emergency
2246	PB File	MAMC	Hosp-3	Apr-19	Surgery Em	GenSx	2019-04-15		Exp lap ( TB- intestinal obstruction)	Exploratory Laparotomy | Essential	Laparotomy	25	F		General Anaesthesia	Essential	Essential	1	1		Emergency
2248	PB File	MAMC	Hosp-3	Apr-19	Surgery Em	GenSx	2019-04-16		Exp Lap (Perforation Peritonitis)	Exploratory Laparotomy | Essential	Laparotomy	42	M		General Anaesthesia	Essential	Essential	1	1		Emergency
2250	PB File	MAMC	Hosp-3	Apr-19	Surgery Em	GenSx	2019-04-16		Exp lap (intestinal obstruction)	Exploratory Laparotomy | Essential	Laparotomy	35	M		General Anaesthesia	Essential	Essential	1	1		Emergency
2251	PB File	MAMC	Hosp-3	Apr-19	Surgery Em	GenSx	2019-04-16		Exp lap (intestinal obstruction)	Exploratory Laparotomy | Essential	Laparotomy	22	F		General Anaesthesia	Essential	Essential	1	1		Emergency
2253	PB File	MAMC	Hosp-3	Apr-19	Surgery Em	GenSx	2019-04-17		Exp lap (Bowel ischemia)	Exploratory Laparotomy | Essential	Laparotomy	59	M		General Anaesthesia	Essential	Essential	1	1		Emergency
2254	PB File	MAMC	Hosp-3	Apr-19	Surgery Em	GenSx	2019-04-17		Exp lap	Exploratory Laparotomy | Essential	Laparotomy	34	M		General Anaesthesia	Essential	Essential	1	1		Emergency
2255	PB File	MAMC	Hosp-3	Apr-19	Surgery Em	GenSx	2019-04-17		Exp lap (intestinal obstruction)	Exploratory Laparotomy | Essential	Laparotomy	26	F		General Anaesthesia	Essential	Essential	1	1		Emergency
2256	PB File	MAMC	Hosp-3	Apr-19	Surgery Em	GenSx	2019-04-18		Exp Lap (Perforation Peritonitis)	Exploratory Laparotomy | Essential	Laparotomy	30	M		General Anaesthesia	Essential	Essential	1	1		Emergency
2258	PB File	MAMC	Hosp-3	Apr-19	Surgery Em	GenSx	2019-04-18		Exp Laparotomy + Lavage (fire arm injury)	Exploratory Laparotomy | Essential	Laparotomy	27	M		General Anaesthesia	Essential	Essential	1	1		Emergency
2260	PB File	MAMC	Hosp-3	Apr-19	Surgery Em	GenSx	2019-04-18		Exp lap (intestinal obstruction)	Exploratory Laparotomy | Essential	Laparotomy	19	M		General Anaesthesia	Essential	Essential	1	1		Emergency
2261	PB File	MAMC	Hosp-3	Apr-19	Surgery Em	GenSx	2019-04-19		Exp laparotomy & Stoma (Fecal fistula)	Exploratory Laparotomy | Essential	Laparotomy	40	M		General Anaesthesia	Essential	Essential	1	1		Emergency
2262	PB File	MAMC	Hosp-3	Apr-19	Surgery Em	GenSx	2019-04-20		Exp Lap (Perforation Peritonitis)	Exploratory Laparotomy | Essential	Laparotomy	25	M		General Anaesthesia	Essential	Essential	1	1		Emergency
2263	PB File	MAMC	Hosp-3	Apr-19	Surgery Em	GenSx	2019-04-20		Exp Lap (Perforation Peritonitis)	Exploratory Laparotomy | Essential	Laparotomy	19	M		General Anaesthesia	Essential	Essential	1	1		Emergency
2264	PB File	MAMC	Hosp-3	Apr-19	Surgery Em	GenSx	2019-04-20		Exp Laparotomy + Right hemicolectomy +Lavage (ruptured liver abscess)	Exploratory Laparotomy | Essential	Laparotomy	49	M		General Anaesthesia	Essential	Essential	1	1		Emergency
2266	PB File	MAMC	Hosp-3	Apr-19	Surgery Em	GenSx	2019-04-21		Exp Lap (Perforation Peritonitis)	Exploratory Laparotomy | Essential	Laparotomy	20	F		General Anaesthesia	Essential	Essential	1	1		Emergency
2268	PB File	MAMC	Hosp-3	Apr-19	Surgery Em	GenSx	2019-04-23		Exp Lap for Intestinal obstruction	Exploratory Laparotomy | Essential	Laparotomy	50	M		General Anaesthesia	Essential	Essential	1	1		Emergency
2269	PB File	MAMC	Hosp-3	Apr-19	Surgery Em	GenSx	2019-04-23		Exp Lap for Acute intestinal obstruction	Exploratory Laparotomy | Essential	Laparotomy	22	M		General Anaesthesia	Essential	Essential	1	1		Emergency
2271	PB File	MAMC	Hosp-3	Apr-19	Surgery Em	GenSx	2019-04-24		Exp lap & Stoma (perforation peritonitis)	Exploratory Laparotomy | Essential	Laparotomy	22	M		General Anaesthesia	Essential	Essential	1	1		Emergency
2272	PB File	MAMC	Hosp-3	Apr-19	Surgery Em	GenSx	2019-04-24		Exp lap and proceed	Exploratory Laparotomy | Essential	Laparotomy	18	M		General Anaesthesia	Essential	Essential	1	1		Emergency
2273	PB File	MAMC	Hosp-3	Apr-19	Surgery Em	GenSx	2019-04-24		Exp Lap for Acute intestinal obstruction	Exploratory Laparotomy | Essential	Laparotomy	34	M		General Anaesthesia	Essential	Essential	1	1		Emergency
2274	PB File	MAMC	Hosp-3	Apr-19	Surgery Em	GenSx	2019-04-24		Exp Lap (Perforation Peritonitis)	Exploratory Laparotomy | Essential	Laparotomy	17	M		General Anaesthesia	Essential	Essential	1	1		Emergency
2275	PB File	MAMC	Hosp-3	Apr-19	Surgery Em	GenSx	2019-04-25		Exp Lap for Ruptured liver abcess	Exploratory Laparotomy | Essential	Laparotomy	26	M		General Anaesthesia	Essential	Essential	1	1		Emergency
2276	PB File	MAMC	Hosp-3	Apr-19	Surgery Em	GenSx	2019-04-25		Exp laparotomy & Stoma (Fecal fistula)	Exploratory Laparotomy | Essential	Laparotomy	22	M		General Anaesthesia	Essential	Essential	1	1		Emergency
2277	PB File	MAMC	Hosp-3	Apr-19	Surgery Em	GenSx	2019-04-25		Exp Lap for Acute intestinal obstruction	Exploratory Laparotomy | Essential	Laparotomy	60	F		General Anaesthesia	Essential	Essential	1	1		Emergency
2278	PB File	MAMC	Hosp-3	Apr-19	Surgery Em	GenSx	2019-04-26		Exp Lap & Stoma (Perforation Peritonitis)	Exploratory Laparotomy | Essential	Laparotomy	18	M		General Anaesthesia	Essential	Essential	1	1		Emergency
2280	PB File	MAMC	Hosp-3	Apr-19	Surgery Em	GenSx	2019-04-27		Exp Lap for Acute intestinal obstruction	Exploratory Laparotomy | Essential	Laparotomy	15	F		General Anaesthesia	Essential	Essential	1	1		Emergency
2281	PB File	MAMC	Hosp-3	Apr-19	Surgery Em	GenSx	2019-04-27		Exp Lap (Perforation Peritonitis)	Exploratory Laparotomy | Essential	Laparotomy	18	M		General Anaesthesia	Essential	Essential	1	1		Emergency
2283	PB File	MAMC	Hosp-3	Apr-19	Surgery Em	GenSx	2019-04-28		Exp Lap for Stab injury( Perforation Peritonitis)	Exploratory Laparotomy | Essential	Laparotomy	22	M		General Anaesthesia	Essential	Essential	1	1		Emergency
2284	PB File	MAMC	Hosp-3	Apr-19	Surgery Em	GenSx	2019-04-28		Exp Lap (Perforation Peritonitis)	Exploratory Laparotomy | Essential	Laparotomy	35	F		General Anaesthesia	Essential	Essential	1	1		Emergency
2285	PB File	MAMC	Hosp-3	Apr-19	Surgery Em	GenSx	2019-04-28		Exp Lap for Stab injury( Perforation Peritonitis)	Exploratory Laparotomy | Essential	Laparotomy	23	M		General Anaesthesia	Essential	Essential	1	1		Emergency
2286	PB File	MAMC	Hosp-3	Apr-19	Surgery Em	GenSx	2019-04-28		Exp Lap for Acute intestinal obstruction	Exploratory Laparotomy | Essential	Laparotomy	28	F		General Anaesthesia	Essential	Essential	1	1		Emergency
2287	PB File	MAMC	Hosp-3	Apr-19	Surgery Em	GenSx	2019-04-30		Re-Exp lap and Stoma (Anastomotic Leak)	Exploratory Laparotomy | Essential	Laparotomy	38	F		General Anaesthesia	Essential	Essential	1	1		Emergency
2289	PB File	MAMC	Hosp-3	Apr-19	Surgery Em	GenSx	2019-04-30		Exp Lap (Perforation Peritonitis)	Exploratory Laparotomy | Essential	Laparotomy	32	F		General Anaesthesia	Essential	Essential	1	1		Emergency
2342	PB File	Terna	Hosp-5	Apr-19	General Surgery	GenSx	16/04/2019		EXP. LAPROTOMY FOR PERFORATION	Exploratory Laparotomy | Essential	Laparotomy	999	M		Regional Anesthesia: Spinal, Epidural and Regional Blocks	Essential	Essential	1	1		Emergency
2343	PB File	Terna	Hosp-5	Apr-19	Obstetrics & Gynaecology	ObGy	28/04/2019		EMERGENCY LAPROSCOPIC SALPHINGECTOMY FOR ECTOPIC GESTATION	Exploratory Laparotomy | Essential	Laparotomy	999	F		General Anaesthesia	Essential	Essential	1	1		Emergency
2350	PB File	KEM	Hosp-2	Apr-19	General Surgery	GenSx	2019-04-29		EEL for CBD exploration	Exploratory Laparotomy | Essential	Laparotomy	60	M		General Anaesthesia	Essential	Essential	3	3		Emergency
2379	PB File	KEM	Hosp-2	Apr-19	General Surgery	GenSx	2019-04-02		EEL i/v/o perforation peritonitis	Exploratory Laparotomy | Essential	Laparotomy	47	M		General Anaesthesia	Essential	Essential	1	1		Emergency
2380	PB File	KEM	Hosp-2	Apr-19	General Surgery	GenSx	2019-04-02		EEL i/v/o intestinal obstruction	Exploratory Laparotomy | Essential	Laparotomy	30	F		General Anaesthesia	Essential	Essential	1	1		Emergency
2381	PB File	KEM	Hosp-2	Apr-19	General Surgery	GenSx	2019-04-02		EEL i/v/o intestinal obstruction	Exploratory Laparotomy | Essential	Laparotomy	40	F		General Anaesthesia	Essential	Essential	1	1		Emergency
2382	PB File	KEM	Hosp-2	Apr-19	General Surgery	GenSx	2019-04-02		EEL for intestinal obstruction	Exploratory Laparotomy | Essential	Laparotomy	62	M		General Anaesthesia	Essential	Essential	1	1		Emergency
2383	PB File	KEM	Hosp-2	Apr-19	General Surgery	GenSx	2019-04-02		EEL i/v/o perforation SOS R and A	Exploratory Laparotomy | Essential	Laparotomy	58	M		General Anaesthesia	Essential	Essential	1	1		Emergency
2384	PB File	KEM	Hosp-2	Apr-19	General Surgery	GenSx	2019-04-02		EEL i/v/o perforation SOS Stoma	Exploratory Laparotomy | Essential	Laparotomy	58	M		General Anaesthesia	Essential	Essential	1	1		Emergency
2385	PB File	KEM	Hosp-2	Apr-19	General Surgery	GenSx	2019-04-03		Reformation of stoma	Exploratory Laparotomy | Essential	Laparotomy	28	M		General Anaesthesia	Essential	Essential	1	1		Emergency
2386	PB File	KEM	Hosp-2	Apr-19	General Surgery	GenSx	2019-04-03		Reexploration in an o/c/o perforative peritonitis + large washes + reformation of stoma	Exploratory Laparotomy | Essential	Laparotomy	28	M		General Anaesthesia	Essential	Essential	1	1		Emergency
2387	PB File	KEM	Hosp-2	Apr-19	General Surgery	GenSx	2019-04-03		EEL I/v/o Intestional perforation	Exploratory Laparotomy | Essential	Laparotomy	30	M		General Anaesthesia	Essential	Essential	1	1		Emergency
2388	PB File	KEM	Hosp-2	Apr-19	General Surgery	GenSx	2019-04-04		EEL i/v/o CBD exploration with feeding JJ	Exploratory Laparotomy | Essential	Laparotomy	45	F		General Anaesthesia	Essential	Essential	1	1		Emergency
2389	PB File	KEM	Hosp-2	Apr-19	General Surgery	GenSx	2019-04-04		EEL i/v/o perforative peritonitis due to EPCP	Exploratory Laparotomy | Essential	Laparotomy	45	F		General Anaesthesia	Essential	Essential	1	1		Emergency
2390	PB File	KEM	Hosp-2	Apr-19	General Surgery	GenSx	2019-04-04		EEL i/v/o IBD	Exploratory Laparotomy | Essential	Laparotomy	28	M		General Anaesthesia	Essential	Essential	1	1		Emergency
2391	PB File	KEM	Hosp-2	Apr-19	General Surgery	GenSx	2019-04-05		EEL acute Intestinal Obstruction	Exploratory Laparotomy | Essential	Laparotomy	32	M		General Anaesthesia	Essential	Essential	1	1		Emergency
2392	PB File	KEM	Hosp-2	Apr-19	General Surgery	GenSx	2019-04-05		EEL i/v/o SOS RA SOS stoma	Exploratory Laparotomy | Essential	Laparotomy	38	M		Regional Anesthesia: Spinal, Epidural and Regional Blocks	Essential	Essential	1	1		Emergency
2393	PB File	KEM	Hosp-2	Apr-19	General Surgery	GenSx	2019-04-05		Reexploration EEL i/v/o Bile leak	Exploratory Laparotomy | Essential	Laparotomy	60	M		General Anaesthesia	Essential	Essential	1	1		Emergency
2394	PB File	KEM	Hosp-2	Apr-19	General Surgery	GenSx	2019-04-05		EEL for perforative peritonitis	Exploratory Laparotomy | Essential	Laparotomy	75	F		General Anaesthesia	Essential	Essential	1	1		Emergency
2395	PB File	KEM	Hosp-2	Apr-19	General Surgery	GenSx	2019-04-06		EEL of obstructive umbilical hernia	Exploratory Laparotomy | Essential	Laparotomy	50	F		General Anaesthesia	Essential	Essential	1	1		Emergency
2396	PB File	KEM	Hosp-2	Apr-19	General Surgery	GenSx	2019-04-07		EEL i/v/o SOS Stoma	Exploratory Laparotomy | Essential	Laparotomy	50	M		General Anaesthesia	Essential	Essential	1	1		Emergency
2397	PB File	KEM	Hosp-2	Apr-19	General Surgery	GenSx	2019-04-07		EEL i/v/o acute intestinal obstructive SOS Stoma	Exploratory Laparotomy | Essential	Laparotomy	50	M		General Anaesthesia	Essential	Essential	1	1		Emergency
2398	PB File	KEM	Hosp-2	Apr-19	General Surgery	GenSx	2019-04-07		Exploratory Laprotomy i/v/o stab injury	Exploratory Laparotomy | Essential	Laparotomy	40	M		General Anaesthesia	Essential	Essential	1	1		Emergency
2399	PB File	KEM	Hosp-2	Apr-19	General Surgery	GenSx	2019-04-08		EEL for intestinal obstruction	Exploratory Laparotomy | Essential	Laparotomy	54	M		Regional Anesthesia: Spinal, Epidural and Regional Blocks	Essential	Essential	1	1		Emergency
2400	PB File	KEM	Hosp-2	Apr-19	General Surgery	GenSx	2019-04-09		EEL i/v/o ischemic bowel disease	Exploratory Laparotomy | Essential	Laparotomy	40	M		Not available	Essential	Essential	1	1		Emergency
2401	PB File	KEM	Hosp-2	Apr-19	General Surgery	GenSx	2019-04-09		Reexploration laparotomy i/v/o Bile leak	Exploratory Laparotomy | Essential	Laparotomy	30	M		General Anaesthesia	Essential	Essential	1	1		Emergency
2402	PB File	KEM	Hosp-2	Apr-19	General Surgery	GenSx	2019-04-10		EEL i/v/o perforation SOS	Exploratory Laparotomy | Essential	Laparotomy	28	M		General Anaesthesia	Essential	Essential	1	1		Emergency
2403	PB File	KEM	Hosp-2	Apr-19	General Surgery	GenSx	2019-04-10		EEL i/v/o resebtion anastomis	Exploratory Laparotomy | Essential	Laparotomy	28	M		General Anaesthesia	Essential	Essential	1	1		Emergency
2404	PB File	KEM	Hosp-2	Apr-19	General Surgery	GenSx	2019-04-10		EEL i/v/o SOS stoma	Exploratory Laparotomy | Essential	Laparotomy	28	M		General Anaesthesia	Essential	Essential	1	1		Emergency
2405	PB File	KEM	Hosp-2	Apr-19	General Surgery	GenSx	2019-04-11		EEL i/v/o Intestinal Obstruction	Exploratory Laparotomy | Essential	Laparotomy	52	F		General Anaesthesia	Essential	Essential	1	1		Emergency
2406	PB File	KEM	Hosp-2	Apr-19	General Surgery	GenSx	2019-04-11		EEL i/v/o obstructed umbilical hernia	Exploratory Laparotomy | Essential	Laparotomy	40	M		General Anaesthesia	Essential	Essential	1	1		Emergency
2407	PB File	KEM	Hosp-2	Apr-19	General Surgery	GenSx	2019-04-11		Reexploration discharge from drain site. repair of leak site	Exploratory Laparotomy | Essential	Laparotomy	48	F		General Anaesthesia	Essential	Essential	1	1		Emergency
2408	PB File	KEM	Hosp-2	Apr-19	General Surgery	GenSx	2019-04-12		EEL perforative peritonitis	Exploratory Laparotomy | Essential	Laparotomy	32	M		General Anaesthesia	Essential	Essential	1	1		Emergency
2409	PB File	KEM	Hosp-2	Apr-19	General Surgery	GenSx	2019-04-12		Emg Exp Lap i/v/o Intestinal Obstruction	Exploratory Laparotomy | Essential	Laparotomy	68	F		General Anaesthesia	Essential	Essential	1	1		Emergency
2410	PB File	KEM	Hosp-2	Apr-19	General Surgery	GenSx	2019-04-13		EELi/v/o intestinal perf SOS R	Exploratory Laparotomy | Essential	Laparotomy	18	M		General Anaesthesia	Essential	Essential	1	1		Emergency
2411	PB File	KEM	Hosp-2	Apr-19	General Surgery	GenSx	2019-04-13		EELi/v/o SOS stoma	Exploratory Laparotomy | Essential	Laparotomy	18	M		General Anaesthesia	Essential	Essential	1	1		Emergency
2412	PB File	KEM	Hosp-2	Apr-19	General Surgery	GenSx	2019-04-13		EEL i/v/o perforation of rt hemicolectomy	Exploratory Laparotomy | Essential	Laparotomy	40	M		General Anaesthesia	Essential	Essential	1	1		Emergency
2413	PB File	KEM	Hosp-2	Apr-19	General Surgery	GenSx	2019-04-13		EEL i/v/o perforation of rt ileastomy	Exploratory Laparotomy | Essential	Laparotomy	40	M		General Anaesthesia	Essential	Essential	1	1		Emergency
2414	PB File	KEM	Hosp-2	Apr-19	General Surgery	GenSx	2019-04-14		EEL intestinal obstruction	Exploratory Laparotomy | Essential	Laparotomy	62	M		Regional Anesthesia: Spinal, Epidural and Regional Blocks	Essential	Essential	1	1	Epidural	Emergency
2415	PB File	KEM	Hosp-2	Apr-19	General Surgery	GenSx	2019-04-14		EEL perforative perforation	Exploratory Laparotomy | Essential	Laparotomy	22	M		General Anaesthesia	Essential	Essential	1	1	GA with epidural	Emergency
2416	PB File	KEM	Hosp-2	Apr-19	General Surgery	GenSx	2019-04-14		EEL with pancreatic necrosis	Exploratory Laparotomy | Essential	Laparotomy	48	F		General Anaesthesia	Essential	Essential	Could Not Be Assigned	Could Not Be Assigned		Emergency
2417	PB File	KEM	Hosp-2	Apr-19	General Surgery	GenSx	2019-04-14		EEL with stoma	Exploratory Laparotomy | Essential	Laparotomy	48	F		General Anaesthesia	Essential	Essential	1	1		Emergency
2418	PB File	KEM	Hosp-2	Apr-19	General Surgery	GenSx	2019-04-15		EEL for intestinal obstruction	Exploratory Laparotomy | Essential	Laparotomy	32	F		General Anaesthesia	Essential	Essential	1	1		Emergency
2419	PB File	KEM	Hosp-2	Apr-19	General Surgery	GenSx	2019-04-15		Emg reexploration for peritonitis in an operated case of Ischemic bowel disease	Exploratory Laparotomy | Essential	Laparotomy	28	M		General Anaesthesia	Essential	Essential	1	1		Emergency
2420	PB File	KEM	Hosp-2	Apr-19	General Surgery	GenSx	2019-04-16		EEL i/v/o Caecal mass rt hemicolectomy	Exploratory Laparotomy | Essential	Laparotomy	31	M		General Anaesthesia	Essential	Essential	1	1		Emergency
2421	PB File	KEM	Hosp-2	Apr-19	General Surgery	GenSx	2019-04-17		EEL I/v/o obstruction SOS Resection sos stoma	Exploratory Laparotomy | Essential	Laparotomy	20	M		General Anaesthesia	Essential	Essential	1	1		Emergency
2422	PB File	KEM	Hosp-2	Apr-19	General Surgery	GenSx	2019-04-17		EEL SOS R section anastomosis sos stoma	Exploratory Laparotomy | Essential	Laparotomy	75	M		General Anaesthesia	Essential	Essential	1	1		Emergency
2423	PB File	KEM	Hosp-2	Apr-19	General Surgery	GenSx	2019-04-17		EEL for intestinal obstruction	Exploratory Laparotomy | Essential	Laparotomy	36	M		General Anaesthesia	Essential	Essential	1	1		Emergency
2424	PB File	KEM	Hosp-2	Apr-19	General Surgery	GenSx	2019-04-18		EEL i/v/o Intestinal Obstruction	Exploratory Laparotomy | Essential	Laparotomy	55	F		General Anaesthesia	Essential	Essential	1	1		Emergency
2425	PB File	KEM	Hosp-2	Apr-19	General Surgery	GenSx	2019-04-18		EEL SOS RA sos Stoma	Exploratory Laparotomy | Essential	Laparotomy	91	M		General Anaesthesia	Essential	Essential	1	1		Emergency
2426	PB File	KEM	Hosp-2	Apr-19	General Surgery	GenSx	2019-04-19		EEL for acute intestinal obstruction	Exploratory Laparotomy | Essential	Laparotomy	18	F		General Anaesthesia	Essential	Essential	1	1		Emergency
2427	PB File	KEM	Hosp-2	Apr-19	General Surgery	GenSx	2019-04-20		EEL for intestinal obstruction	Exploratory Laparotomy | Essential	Laparotomy	13	F		General Anaesthesia	Essential	Essential	1	1		Emergency
2428	PB File	KEM	Hosp-2	Apr-19	General Surgery	GenSx	2019-04-21		EEL i/v/o perforation	Exploratory Laparotomy | Essential	Laparotomy	33	M		General Anaesthesia	Essential	Essential	1	1		Emergency
2429	PB File	KEM	Hosp-2	Apr-19	General Surgery	GenSx	2019-04-22		EEL for perforative peritonitis	Exploratory Laparotomy | Essential	Laparotomy	60	F		General Anaesthesia	Essential	Essential	1	1		Emergency
2430	PB File	KEM	Hosp-2	Apr-19	General Surgery	GenSx	2019-04-25		Emg exploration i/v/o fecal peritonitis	Exploratory Laparotomy | Essential	Laparotomy	42	M		General Anaesthesia	Essential	Essential	1	1		Emergency
2431	PB File	KEM	Hosp-2	Apr-19	General Surgery	GenSx	2019-04-26		EEL obstruction post exploratory perforation	Exploratory Laparotomy | Essential	Laparotomy	70	M		General Anaesthesia	Essential	Essential	1	1		Emergency
2432	PB File	KEM	Hosp-2	Apr-19	General Surgery	GenSx	2019-04-27		EEL for fecal perforation	Exploratory Laparotomy | Essential	Laparotomy	85	F		General Anaesthesia	Essential	Essential	1	1		Emergency
2433	PB File	KEM	Hosp-2	Apr-19	General Surgery	GenSx	2019-04-27		EEL for intestinal obstruction	Exploratory Laparotomy | Essential	Laparotomy	65	M		General Anaesthesia	Essential	Essential	1	1		Emergency
2434	PB File	KEM	Hosp-2	Apr-19	General Surgery	GenSx	2019-04-28		EEL i/v/o perforated peritonitis	Exploratory Laparotomy | Essential	Laparotomy	62	M		General Anaesthesia	Essential	Essential	1	1		Emergency
2435	PB File	KEM	Hosp-2	Apr-19	General Surgery	GenSx	2019-04-28		Debridement of gangrenen XXXX colostomy	Exploratory Laparotomy | Essential	Laparotomy	50	M		General Anaesthesia	Non-Essential	Essential	1	1		Emergency
2436	PB File	KEM	Hosp-2	Apr-19	General Surgery	GenSx	2019-04-28		EEL i/v/o intestinal Perforation IBD	Exploratory Laparotomy | Essential	Laparotomy	86	M		General Anaesthesia	Essential	Essential	1	1		Emergency
2437	PB File	KEM	Hosp-2	Apr-19	General Surgery	GenSx	2019-04-28		EEL i/v/o Intestinal Obstruction	Exploratory Laparotomy | Essential	Laparotomy	47	M		Regional Anesthesia: Spinal, Epidural and Regional Blocks	Essential	Essential	1	1		Emergency
2438	PB File	KEM	Hosp-2	Apr-19	General Surgery	GenSx	2019-04-29		EEL for CBD exploration	Exploratory Laparotomy | Essential	Laparotomy	60	M		General Anaesthesia	Essential	Essential	3	3		Emergency
2439	PB File	KEM	Hosp-2	Apr-19	General Surgery	GenSx	2019-04-26		EEL	Exploratory Laparotomy | Essential	Laparotomy	29	F		General Anaesthesia	Essential	Essential	1	1		Emergency
2440	PB File	KEM	Hosp-2	Apr-19	General Surgery	GenSx	2019-04-04		Exp Lap	Exploratory Laparotomy | Essential	Laparotomy	50	999		General Anaesthesia	Essential	Essential	1	1		Emergency
2441	PB File	KEM	Hosp-2	Apr-19	OBGY	ObGy	2019-04-15		Exploratory Laparoscopy with adhesiolysisxxxxx	Exploratory Laparotomy | Essential	Laparotomy	35	F		Regional Anesthesia: Spinal, Epidural and Regional Blocks	Essential	Essential	1	1		Emergency
2442	PB File	KEM	Hosp-2	Apr-19	OBGY	ObGy	2019-04-15		Exploratory Laparoscopy with Tubo ovarian mass excision	Exploratory Laparotomy | Essential	Laparotomy	40	F		Regional Anesthesia: Spinal, Epidural and Regional Blocks	Non-Essential	Essential	2	2		Emergency
2443	PB File	KEM	Hosp-2	Apr-19	OBGY	ObGy	2019-04-02		Emergency exploratory laparotomy with Rt oophorectomy	Exploratory Laparotomy | Essential	Laparotomy	19	F		Regional Anesthesia: Spinal, Epidural and Regional Blocks	Essential	Essential	2	2		Emergency
2444	PB File	KEM	Hosp-2	Apr-19	OBGY	ObGy	2019-04-06		Emergency Hysterectomy	Exploratory Laparotomy | Essential	Laparotomy	38	F		Not available	Essential	Essential	1	1		Emergency
2445	PB File	KEM	Hosp-2	Apr-19	OBGY	ObGy	2019-04-11		Emergency Exploratory laparotomy with Rt partial salphingectomy	Exploratory Laparotomy | Essential	Laparotomy	32	F		Regional Anesthesia: Spinal, Epidural and Regional Blocks	Essential	Essential	1	1		Emergency
2446	PB File	KEM	Hosp-2	Apr-19	OBGY	ObGy	2019-04-13		Emergency check curettage with b/l tubal ligation	Exploratory Laparotomy | Essential	Laparotomy	27	F		Regional Anesthesia: Spinal, Epidural and Regional Blocks	Essential	Essential	1	1		Emergency
2447	PB File	KEM	Hosp-2	Apr-19	OBGY	ObGy	2019-04-14		Emergency Exploratory Laparotomy xx right salpingectomy xx bowel tracing	Exploratory Laparotomy | Essential	Laparotomy	28	F		General Anaesthesia	Essential	Essential	1	1		Emergency
2448	PB File	KEM	Hosp-2	Apr-19	OBGY	ObGy	2019-04-14		Emergency Exploratory Laparotomy xx right salpingectomy	Exploratory Laparotomy | Essential	Laparotomy	35	F		General Anaesthesia	Essential	Essential	1	1		Emergency
2449	PB File	KEM	Hosp-2	Apr-19	OBGY	ObGy	2019-04-16		Emergency exploratory laparotomy rt salphingectomy	Exploratory Laparotomy | Essential	Laparotomy	28	F		Regional Anesthesia: Spinal, Epidural and Regional Blocks	Essential	Essential	1	1		Emergency
2450	PB File	KEM	Hosp-2	Apr-19	OBGY	ObGy	2019-04-18		Emergency exploratory laparotomy with unilateral left salpingectomy	Exploratory Laparotomy | Essential	Laparotomy	28	F		Regional Anesthesia: Spinal, Epidural and Regional Blocks	Essential	Essential	1	1		Emergency
2451	PB File	KEM	Hosp-2	Apr-19	OBGY	ObGy	2019-04-20		EEL	Exploratory Laparotomy | Essential	Laparotomy	38	F		General Anaesthesia	Essential	Essential	1	1		Emergency
2452	PB File	KEM	Hosp-2	Apr-19	OBGY	ObGy	2019-04-21		EEL with obstretric hysterectomy (subtotal hysterectomy)	Exploratory Laparotomy | Essential	Laparotomy	28	F		General Anaesthesia	Essential	Essential	1	1		Emergency
2453	PB File	KEM	Hosp-2	Apr-19	OBGY	ObGy	2019-04-21		EEL with Bowel tracing repair , adhesiolysis, loop iliostomy	Exploratory Laparotomy | Essential	Laparotomy	28	F		General Anaesthesia	Essential	Essential	1	1		Emergency
2486	PB File	MAMC	Hosp-3	Apr-19	Gen.Surgery	GenSx	2019-01-04		Lap Cholecystectomy	Gall Bladder Sx | Essential		32	M		General Anaesthesia	Essential	Essential	4	4	1	Elective
2487	PB File	MAMC	Hosp-3	Apr-19	Gen.Surgery	GenSx	2019-01-04		Lap Cholecystectomy & CBD Exploration	Gall Bladder Sx | Essential		52	F		General Anaesthesia	Essential	Essential	4	4	1	Elective
2488	PB File	MAMC	Hosp-3	Apr-19	Gen.Surgery	GenSx	2019-01-04		Lap Cholecystectomy	Gall Bladder Sx | Essential		60	F		General Anaesthesia	Essential	Essential	4	4		Elective
2489	PB File	MAMC	Hosp-3	Apr-19	Gen.Surgery	GenSx	2019-01-04		Lap Cholecystectomy	Gall Bladder Sx | Essential		28	F		General Anaesthesia	Essential	Essential	4	4	1	Elective
2490	PB File	MAMC	Hosp-3	Apr-19	Gen.Surgery	GenSx	2019-01-04		Lap Cholecystectomy	Gall Bladder Sx | Essential		28	F		General Anaesthesia	Essential	Essential	4	4		Elective
2491	PB File	MAMC	Hosp-3	Apr-19	Gen.Surgery	GenSx	2019-01-04		Lap Cholecystectomy	Gall Bladder Sx | Essential		56	F		General Anaesthesia	Essential	Essential	4	4	1	Elective
2492	PB File	MAMC	Hosp-3	Apr-19	Gen.Surgery	GenSx	2019-02-04		Lap Cholecystectomy	Gall Bladder Sx | Essential		62	M		General Anaesthesia	Essential	Essential	4	4	1	Elective
2493	PB File	MAMC	Hosp-3	Apr-19	Gen.Surgery	GenSx	2019-02-04		Lap Cholecystectomy	Gall Bladder Sx | Essential		30	F		General Anaesthesia	Essential	Essential	4	4	1	Elective
2494	PB File	MAMC	Hosp-3	Apr-19	Gen.Surgery	GenSx	2019-02-04		Lap Cholecystectomy	Gall Bladder Sx | Essential		35	M		General Anaesthesia	Essential	Essential	4	4		Elective
2495	PB File	MAMC	Hosp-3	Apr-19	Gen.Surgery	GenSx	2019-02-04		Lap Cholecystectomy	Gall Bladder Sx | Essential		35	F		General Anaesthesia	Essential	Essential	4	4		Elective
2496	PB File	MAMC	Hosp-3	Apr-19	Gen.Surgery	GenSx	2019-03-04		Lap Cholecystectomy	Gall Bladder Sx | Essential		31	F		General Anaesthesia	Essential	Essential	4	4		Elective
2497	PB File	MAMC	Hosp-3	Apr-19	Gen.Surgery	GenSx	2019-03-04		Open Cholecystectomy	Gall Bladder Sx | Essential		55	M		General Anaesthesia	Essential	Essential	4	4		Elective
2498	PB File	MAMC	Hosp-3	Apr-19	Gen.Surgery	GenSx	2019-03-04		Lap Cholecystectomy	Gall Bladder Sx | Essential		37	F		General Anaesthesia	Essential	Essential	4	4		Elective
2499	PB File	MAMC	Hosp-3	Apr-19	Gen.Surgery	GenSx	2019-03-04		Lap Cholecystectomy	Gall Bladder Sx | Essential		55	F		General Anaesthesia	Essential	Essential	4	4		Elective
2500	PB File	MAMC	Hosp-3	Apr-19	Gen.Surgery	GenSx	2019-03-04		Lap Cholecystectomy	Gall Bladder Sx | Essential		57	M		General Anaesthesia	Essential	Essential	4	4		Elective
2501	PB File	MAMC	Hosp-3	Apr-19	Gen.Surgery	GenSx	2019-03-04		Lap Cholecystectomy	Gall Bladder Sx | Essential		34	F		General Anaesthesia	Essential	Essential	4	4		Elective
2502	PB File	MAMC	Hosp-3	Apr-19	Gen.Surgery	GenSx	2019-04-04		Lap Cholecystectomy	Gall Bladder Sx | Essential		45	M		General Anaesthesia	Essential	Essential	4	4		Elective
2503	PB File	MAMC	Hosp-3	Apr-19	Gen.Surgery	GenSx	2019-04-04		Lap Cholecystectomy	Gall Bladder Sx | Essential		40	F		General Anaesthesia	Essential	Essential	4	4	NA	Elective
2504	PB File	MAMC	Hosp-3	Apr-19	Gen.Surgery	GenSx	2019-04-04		Lap Cholecystectomy	Gall Bladder Sx | Essential		37	F		General Anaesthesia	Essential	Essential	4	4		Elective
2505	PB File	MAMC	Hosp-3	Apr-19	Gen.Surgery	GenSx	2019-05-04		Lap Cholecystectomy	Gall Bladder Sx | Essential		36	M		General Anaesthesia	Essential	Essential	4	4		Elective
2506	PB File	MAMC	Hosp-3	Apr-19	Gen.Surgery	GenSx	2019-05-04		Lap Cholecystectomy	Gall Bladder Sx | Essential		27	F		General Anaesthesia	Essential	Essential	4	4		Elective
2507	PB File	MAMC	Hosp-3	Apr-19	Gen.Surgery	GenSx	2019-05-04		Lap Cholecystectomy	Gall Bladder Sx | Essential		38	F		General Anaesthesia	Essential	Essential	4	4		Elective
2508	PB File	MAMC	Hosp-3	Apr-19	Gen.Surgery	GenSx	2019-05-04		Lap Cholecystectomy	Gall Bladder Sx | Essential		39	M		General Anaesthesia	Essential	Essential	4	4		Elective
2509	PB File	MAMC	Hosp-3	Apr-19	Gen.Surgery	GenSx	2019-05-04		Lap Cholecystectomy	Gall Bladder Sx | Essential		45	M		General Anaesthesia	Essential	Essential	4	4		Elective
2510	PB File	MAMC	Hosp-3	Apr-19	Gen.Surgery	GenSx	2019-06-04		Lap Cholecystectomy	Gall Bladder Sx | Essential		30	F		General Anaesthesia	Essential	Essential	4	4		Elective
2511	PB File	MAMC	Hosp-3	Apr-19	Gen.Surgery	GenSx	2019-06-04		Lap Cholecystectomy	Gall Bladder Sx | Essential		47	F		General Anaesthesia	Essential	Essential	4	4		Elective
2512	PB File	MAMC	Hosp-3	Apr-19	Gen.Surgery	GenSx	2019-08-04		Lap Cholecystectomy	Gall Bladder Sx | Essential		24	F		General Anaesthesia	Essential	Essential	4	4		Elective
2513	PB File	MAMC	Hosp-3	Apr-19	Gen.Surgery	GenSx	2019-08-04		Lap Cholecystectomy	Gall Bladder Sx | Essential		35	F		General Anaesthesia	Essential	Essential	4	4		Elective
2514	PB File	MAMC	Hosp-3	Apr-19	Gen.Surgery	GenSx	2019-08-04		Lap Cholecystectomy	Gall Bladder Sx | Essential		34	M		General Anaesthesia	Essential	Essential	4	4		Elective
2515	PB File	MAMC	Hosp-3	Apr-19	Gen.Surgery	GenSx	2019-08-04		Lap Cholecystectomy	Gall Bladder Sx | Essential		40	M		General Anaesthesia	Essential	Essential	4	4		Elective
2516	PB File	MAMC	Hosp-3	Apr-19	Gen.Surgery	GenSx	2019-08-04		Lap Cholecystectomy	Gall Bladder Sx | Essential		64	M		General Anaesthesia	Essential	Essential	4	4		Elective
2517	PB File	MAMC	Hosp-3	Apr-19	Gen.Surgery	GenSx	2019-09-04		Lap Cholecystectomy	Gall Bladder Sx | Essential		60	F		General Anaesthesia	Essential	Essential	4	4		Elective
2518	PB File	MAMC	Hosp-3	Apr-19	Gen.Surgery	GenSx	2019-09-04		Lap Cholecystectomy	Gall Bladder Sx | Essential		82	F		General Anaesthesia	Essential	Essential	4	4		Elective
2519	PB File	MAMC	Hosp-3	Apr-19	Gen.Surgery	GenSx	2019-09-04		Lap Cholecystectomy	Gall Bladder Sx | Essential		36	F		General Anaesthesia	Essential	Essential	4	4		Elective
2520	PB File	MAMC	Hosp-3	Apr-19	Gen.Surgery	GenSx	2019-09-04		Lap Cholecystectomy	Gall Bladder Sx | Essential		53	F		General Anaesthesia	Essential	Essential	4	4		Elective
2521	PB File	MAMC	Hosp-3	Apr-19	Gen.Surgery	GenSx	2019-10-04		Lap Cholecystectomy	Gall Bladder Sx | Essential		33	M		General Anaesthesia	Essential	Essential	4	4		Elective
2522	PB File	MAMC	Hosp-3	Apr-19	Gen.Surgery	GenSx	2019-10-04		Radical Cholecystectomy	Gall Bladder Sx | Essential		48	F		Not available	Essential	Essential	4	4		Elective
2523	PB File	MAMC	Hosp-3	Apr-19	Gen.Surgery	GenSx	2019-10-04		Lap Cholecystectomy & CBD Exploration	Gall Bladder Sx | Essential		58	M		General Anaesthesia	Essential	Essential	4	4		Elective
2524	PB File	MAMC	Hosp-3	Apr-19	Gen.Surgery	GenSx	2019-10-04		Lap Cholecystectomy	Gall Bladder Sx | Essential		35	F		General Anaesthesia	Essential	Essential	4	4		Elective
2525	PB File	MAMC	Hosp-3	Apr-19	Gen.Surgery	GenSx	2019-10-04		Lap Cholecystectomy	Gall Bladder Sx | Essential		31	F		General Anaesthesia	Essential	Essential	4	4		Elective
2526	PB File	MAMC	Hosp-3	Apr-19	Gen.Surgery	GenSx	2019-10-04		Lap Cholecystectomy	Gall Bladder Sx | Essential		27	F		General Anaesthesia	Essential	Essential	4	4		Elective
2527	PB File	MAMC	Hosp-3	Apr-19	Gen.Surgery	GenSx	2019-10-04		Lap Cholecystectomy	Gall Bladder Sx | Essential		39	F		General Anaesthesia	Essential	Essential	4	4		Elective
2528	PB File	MAMC	Hosp-3	Apr-19	Gen.Surgery	GenSx	2019-11-04		Open Cholecystectomy	Gall Bladder Sx | Essential		47	F		General Anaesthesia	Essential	Essential	4	4		Elective
2529	PB File	MAMC	Hosp-3	Apr-19	Gen.Surgery	GenSx	2019-11-04		Lap Cholecystectomy	Gall Bladder Sx | Essential		42	F		General Anaesthesia	Essential	Essential	4	4		Elective
2530	PB File	MAMC	Hosp-3	Apr-19	Gen.Surgery	GenSx	2019-11-04		Radical Cholecystectomy	Gall Bladder Sx | Essential		32	M		Local anesthesia not supplemented by sedation or GA	Essential	Essential	4	4		Elective
2531	PB File	MAMC	Hosp-3	Apr-19	Gen.Surgery	GenSx	2019-11-04		Lap Cholecystectomy	Gall Bladder Sx | Essential		23	F		General Anaesthesia	Essential	Essential	4	4		Elective
2532	PB File	MAMC	Hosp-3	Apr-19	Gen.Surgery	GenSx	2019-11-04		Open Cholecystectomy	Gall Bladder Sx | Essential		41	F		General Anaesthesia	Essential	Essential	4	4		Elective
2533	PB File	MAMC	Hosp-3	Apr-19	Gen.Surgery	GenSx	2019-11-04		Lap Cholecystectomy	Gall Bladder Sx | Essential		41	M		General Anaesthesia	Essential	Essential	4	4		Elective
2534	PB File	MAMC	Hosp-3	Apr-19	Gen.Surgery	GenSx	2019-12-04		Open Cholecystectomy & CBD exploration	Gall Bladder Sx | Essential		75	M		General Anaesthesia	Essential	Essential	4	4		Elective
2535	PB File	MAMC	Hosp-3	Apr-19	Gen.Surgery	GenSx	2019-12-04		Open Cholecystectomy & CBD exploration	Gall Bladder Sx | Essential		80	F		General Anaesthesia	Essential	Essential	4	4		Elective
2536	PB File	MAMC	Hosp-3	Apr-19	Gen.Surgery	GenSx	2019-12-04		Lap Cholecystectomy	Gall Bladder Sx | Essential		30	F		General Anaesthesia	Essential	Essential	4	4		Elective
2537	PB File	MAMC	Hosp-3	Apr-19	Gen.Surgery	GenSx	2019-12-04		Lap Cholecystectomy	Gall Bladder Sx | Essential		34	F		General Anaesthesia	Essential	Essential	4	4		Elective
2538	PB File	MAMC	Hosp-3	Apr-19	Gen.Surgery	GenSx	2019-04-13		Lap Cholecystectomy	Gall Bladder Sx | Essential		55	F		General Anaesthesia	Essential	Essential	4	4		Elective
2539	PB File	MAMC	Hosp-3	Apr-19	Gen.Surgery	GenSx	2019-04-13		Lap Cholecystectomy	Gall Bladder Sx | Essential		35	F		General Anaesthesia	Essential	Essential	4	4		Elective
2540	PB File	MAMC	Hosp-3	Apr-19	Gen.Surgery	GenSx	2019-04-13		Lap Cholecystectomy	Gall Bladder Sx | Essential		20	F		General Anaesthesia	Essential	Essential	4	4		Elective
2541	PB File	MAMC	Hosp-3	Apr-19	Gen.Surgery	GenSx	2019-04-13		Lap Cholecystectomy	Gall Bladder Sx | Essential		56	F		General Anaesthesia	Essential	Essential	4	4		Elective
2542	PB File	MAMC	Hosp-3	Apr-19	Gen.Surgery	GenSx	2019-04-15		Lap Cholecystectomy	Gall Bladder Sx | Essential		44	M		General Anaesthesia	Essential	Essential	4	4		Elective
2543	PB File	MAMC	Hosp-3	Apr-19	Gen.Surgery	GenSx	2019-04-15		Lap Cholecystectomy	Gall Bladder Sx | Essential		42	F		General Anaesthesia	Essential	Essential	4	4		Elective
2544	PB File	MAMC	Hosp-3	Apr-19	Gen.Surgery	GenSx	2019-04-15		Lap Cholecystectomy	Gall Bladder Sx | Essential		19	F		Local anesthesia not supplemented by sedation or GA	Essential	Essential	4	4		Elective
2545	PB File	MAMC	Hosp-3	Apr-19	Gen.Surgery	GenSx	2019-04-15		Lap Cholecystectomy	Gall Bladder Sx | Essential		44	F		General Anaesthesia	Essential	Essential	4	4		Elective
2546	PB File	MAMC	Hosp-3	Apr-19	Gen.Surgery	GenSx	2019-04-15		Lap Cholecystectomy	Gall Bladder Sx | Essential		40	M		General Anaesthesia	Essential	Essential	4	4		Elective
2547	PB File	MAMC	Hosp-3	Apr-19	Gen.Surgery	GenSx	2019-04-16		Radical Cholecystectomy	Gall Bladder Sx | Essential		48	F		General Anaesthesia	Essential	Essential	4	4		Elective
2548	PB File	MAMC	Hosp-3	Apr-19	Gen.Surgery	GenSx	2019-04-16		Lap Cholecystectomy	Gall Bladder Sx | Essential		22	F		General Anaesthesia	Essential	Essential	4	4		Elective
2549	PB File	MAMC	Hosp-3	Apr-19	Gen.Surgery	GenSx	2019-04-16		Lap Cholecystectomy	Gall Bladder Sx | Essential		30	F		General Anaesthesia	Essential	Essential	4	4		Elective
2550	PB File	MAMC	Hosp-3	Apr-19	Gen.Surgery	GenSx	2019-04-18		Lap Cholecystectomy	Gall Bladder Sx | Essential		28	F		General Anaesthesia	Essential	Essential	4	4		Elective
2551	PB File	MAMC	Hosp-3	Apr-19	Gen.Surgery	GenSx	2019-04-18		Lap Cholecystectomy	Gall Bladder Sx | Essential		35	F		General Anaesthesia	Essential	Essential	4	4		Elective
2552	PB File	MAMC	Hosp-3	Apr-19	Gen.Surgery	GenSx	2019-04-18		Lap Cholecystectomy	Gall Bladder Sx | Essential		30	F		General Anaesthesia	Essential	Essential	4	4		Elective
2553	PB File	MAMC	Hosp-3	Apr-19	Gen.Surgery	GenSx	2019-04-18		Lap Cholecystectomy	Gall Bladder Sx | Essential		52	F		General Anaesthesia	Essential	Essential	4	4		Elective
2554	PB File	MAMC	Hosp-3	Apr-19	Gen.Surgery	GenSx	2019-04-20		Lap Cholecystectomy	Gall Bladder Sx | Essential		55	F		General Anaesthesia	Essential	Essential	4	4		Elective
2555	PB File	MAMC	Hosp-3	Apr-19	Gen.Surgery	GenSx	2019-04-20		Lap Cholecystectomy	Gall Bladder Sx | Essential		44	M		General Anaesthesia	Essential	Essential	4	4		Elective
2556	PB File	MAMC	Hosp-3	Apr-19	Gen.Surgery	GenSx	2019-04-22		Lap Cholecystectomy	Gall Bladder Sx | Essential		35	F		General Anaesthesia	Essential	Essential	4	4		Elective
2557	PB File	MAMC	Hosp-3	Apr-19	Gen.Surgery	GenSx	2019-04-22		Lap Cholecystectomy	Gall Bladder Sx | Essential		22	F		General Anaesthesia	Essential	Essential	4	4		Elective
2558	PB File	MAMC	Hosp-3	Apr-19	Gen.Surgery	GenSx	2019-04-22		Lap Cholecystectomy	Gall Bladder Sx | Essential		35	M		General Anaesthesia	Essential	Essential	4	4		Elective
2559	PB File	MAMC	Hosp-3	Apr-19	Gen.Surgery	GenSx	2019-04-23		Lap Cholecystectomy	Gall Bladder Sx | Essential		44	F		General Anaesthesia	Essential	Essential	4	4		Elective
2560	PB File	MAMC	Hosp-3	Apr-19	Gen.Surgery	GenSx	2019-04-23		Lap Cholecystectomy & CBD Exploration	Gall Bladder Sx | Essential		40	F		General Anaesthesia	Essential	Essential	4	4		Elective
2561	PB File	MAMC	Hosp-3	Apr-19	Gen.Surgery	GenSx	2019-04-23		Lap Cholecystectomy	Gall Bladder Sx | Essential		61	F		General Anaesthesia	Essential	Essential	4	4		Elective
2562	PB File	MAMC	Hosp-3	Apr-19	Gen.Surgery	GenSx	2019-04-23		Lap Cholecystectomy	Gall Bladder Sx | Essential		35	F		General Anaesthesia	Essential	Essential	4	4		Elective
2563	PB File	MAMC	Hosp-3	Apr-19	Gen.Surgery	GenSx	2019-04-23		Lap Cholecystectomy	Gall Bladder Sx | Essential		56	F		General Anaesthesia	Essential	Essential	4	4		Elective
2564	PB File	MAMC	Hosp-3	Apr-19	Gen.Surgery	GenSx	2019-04-24		Lap Cholecystectomy	Gall Bladder Sx | Essential		28	F		General Anaesthesia	Essential	Essential	4	4		Elective
2565	PB File	MAMC	Hosp-3	Apr-19	Gen.Surgery	GenSx	2019-04-24		Lap Cholecystectomy	Gall Bladder Sx | Essential		47	F		General Anaesthesia	Essential	Essential	4	4		Elective
2566	PB File	MAMC	Hosp-3	Apr-19	Gen.Surgery	GenSx	2019-04-24		Lap Cholecystectomy	Gall Bladder Sx | Essential		30	F		General Anaesthesia	Essential	Essential	4	4		Elective
2567	PB File	MAMC	Hosp-3	Apr-19	Gen.Surgery	GenSx	2019-04-24		Lap Cholecystectomy	Gall Bladder Sx | Essential		31	M		General Anaesthesia	Essential	Essential	4	4		Elective
2568	PB File	MAMC	Hosp-3	Apr-19	Gen.Surgery	GenSx	2019-04-25		Lap Cholecystectomy	Gall Bladder Sx | Essential		27	F		General Anaesthesia	Essential	Essential	4	4		Elective
2569	PB File	MAMC	Hosp-3	Apr-19	Gen.Surgery	GenSx	2019-04-25		Lap Cholecystectomy	Gall Bladder Sx | Essential		56	F		General Anaesthesia	Essential	Essential	4	4		Elective
2570	PB File	MAMC	Hosp-3	Apr-19	Gen.Surgery	GenSx	2019-04-25		Radical Cholecystectomy	Gall Bladder Sx | Essential		56	f		General Anaesthesia	Essential	Essential	4	4		Elective
2571	PB File	MAMC	Hosp-3	Apr-19	Gen.Surgery	GenSx	2019-04-25		Lap Cholecystectomy	Gall Bladder Sx | Essential		57	F		General Anaesthesia	Essential	Essential	4	4		Elective
2572	PB File	MAMC	Hosp-3	Apr-19	Gen.Surgery	GenSx	2019-04-26		Lap Cholecystectomy	Gall Bladder Sx | Essential		41	M		General Anaesthesia	Essential	Essential	4	4		Elective
2573	PB File	MAMC	Hosp-3	Apr-19	Gen.Surgery	GenSx	2019-04-26		Lap Cholecystectomy	Gall Bladder Sx | Essential		42	F		General Anaesthesia	Essential	Essential	4	4		Elective
2574	PB File	MAMC	Hosp-3	Apr-19	Gen.Surgery	GenSx	2019-04-26		Lap Cholecystectomy	Gall Bladder Sx | Essential		40	F		General Anaesthesia	Essential	Essential	4	4		Elective
2575	PB File	MAMC	Hosp-3	Apr-19	Gen.Surgery	GenSx	2019-04-26		Lap Cholecystectomy	Gall Bladder Sx | Essential		24	M		General Anaesthesia	Essential	Essential	4	4		Elective
2576	PB File	MAMC	Hosp-3	Apr-19	Gen.Surgery	GenSx	2019-04-26		Lap Cholecystectomy	Gall Bladder Sx | Essential		46	M		General Anaesthesia	Essential	Essential	4	4		Elective
2577	PB File	MAMC	Hosp-3	Apr-19	Gen.Surgery	GenSx	2019-04-27		Lap Cholecystectomy	Gall Bladder Sx | Essential		40	F		General Anaesthesia	Essential	Essential	4	4		Elective
2578	PB File	MAMC	Hosp-3	Apr-19	Gen.Surgery	GenSx	2019-04-27		Lap Cholecystectomy	Gall Bladder Sx | Essential		40	F		General Anaesthesia	Essential	Essential	4	4		Elective
2579	PB File	MAMC	Hosp-3	Apr-19	Gen.Surgery	GenSx	2019-04-27		Lap Cholecystectomy	Gall Bladder Sx | Essential		24	F		General Anaesthesia	Essential	Essential	4	4		Elective
2580	PB File	MAMC	Hosp-3	Apr-19	Gen.Surgery	GenSx	2019-04-27		Lap Cholecystectomy	Gall Bladder Sx | Essential		29	F		General Anaesthesia	Essential	Essential	4	4		Elective
2581	PB File	MAMC	Hosp-3	Apr-19	Gen.Surgery	GenSx	2019-04-29		Lap Cholecystectomy	Gall Bladder Sx | Essential		33	M		General Anaesthesia	Essential	Essential	4	4		Elective
2582	PB File	MAMC	Hosp-3	Apr-19	Surgery Em	GenSx	2019-01-04		Exp lap & Cholecytostomy	Gall Bladder Sx | Essential		16	M		General Anaesthesia	Essential	Essential	4	4		Emergency
2625	PB File	Terna	Hosp-5	Apr-19	General Surgery	GenSx	2019-03-04		LAPROSCOPIC CHOLECYSTECTOMY WITH UMBILICAL HERNIA REPAIR	Gall Bladder Sx | Essential		999	F		General Anaesthesia	Essential	Essential	4	4		Elective
2626	PB File	Terna	Hosp-5	Apr-19	General Surgery	GenSx	2019-04-04		LAPROSCOPIC CHOLECYSTECTOMY	Gall Bladder Sx | Essential		999	F		General Anaesthesia	Essential	Essential	4	4		Elective
2627	PB File	Terna	Hosp-5	Apr-19	General Surgery	GenSx	2019-12-04		LAPAROSCOPIC CHOLECYSTECTOMY	Gall Bladder Sx | Essential		999	M		General Anaesthesia	Essential	Essential	4	4		Elective
2628	PB File	Terna	Hosp-5	Apr-19	General Surgery	GenSx	2019-12-04		LAPROSCOPIC CHOLECYSTECTOMY	Gall Bladder Sx | Essential		999	F		General Anaesthesia	Essential	Essential	4	4		Elective
2629	PB File	Terna	Hosp-5	Apr-19	General Surgery	GenSx	15/04/2019		LAPAROSCOPIC CHOLECYSTECTOMY	Gall Bladder Sx | Essential		999	M		General Anaesthesia	Essential	Essential	4	4		Elective
2630	PB File	Terna	Hosp-5	Apr-19	General Surgery	GenSx	19/04/2019		LAPROSCOPIC CHOLECYSTECTOMY	Gall Bladder Sx | Essential		999	F		General Anaesthesia	Essential	Essential	4	4		Elective
2631	PB File	Terna	Hosp-5	Apr-19	General Surgery	GenSx	29/04/2019		LAPROSCOPIC CHOLECYSTECTOMY FOR PERFORATED GALL BLADDER	Gall Bladder Sx | Essential		999	F		General Anaesthesia	Essential	Essential	1	1		Emergency
2633	PB File	KEM	Hosp-2	Apr-19	General Surgery	GenSx	2019-04-10		Emg open cholecystomy	Gall Bladder Sx | Essential		60	M		General Anaesthesia	Essential	Essential	1	1		Elective
2634	PB File	KEM	Hosp-2	Apr-19	General Surgery	GenSx	2019-04-29		Open Cholecystomy	Gall Bladder Sx | Essential		63	F		General Anaesthesia	Essential	Essential	4	4		Elective
2635	PB File	KEM	Hosp-2	Apr-19	General Surgery	GenSx	2019-04-30		Lap Cholecystectomy	Gall Bladder Sx | Essential		27	F		General Anaesthesia	Essential	Essential	4	4		Elective
2636	PB File	KEM	Hosp-2	Apr-19	General Surgery	GenSx	2019-04-30		Lap Cholecystectomy	Gall Bladder Sx | Essential		27	F		General Anaesthesia	Essential	Essential	4	4		Elective
2637	PB File	KEM	Hosp-2	Apr-19	General Surgery	GenSx	2019-04-30		Lap Cholecystectomy	Gall Bladder Sx | Essential		32	F		General Anaesthesia	Essential	Essential	4	4		Elective
2638	PB File	KEM	Hosp-2	Apr-19	General Surgery	GenSx	2019-04-30		Lap Cholecystectomy	Gall Bladder Sx | Essential		32	F		General Anaesthesia	Essential	Essential	4	4		Elective
2639	PB File	KEM	Hosp-2	Apr-19	General Surgery	GenSx	2019-04-30		Lap Cholecystectomy	Gall Bladder Sx | Essential		32	F		General Anaesthesia	Essential	Essential	4	4		Elective
2640	PB File	KEM	Hosp-2	Apr-19	General Surgery	GenSx	2019-04-27		Open Cholecystomy	Gall Bladder Sx | Essential		30	999		Regional Anesthesia: Spinal, Epidural and Regional Blocks	Essential	Essential	4	4		Elective
2641	PB File	KEM	Hosp-2	Apr-19	General Surgery	GenSx	2019-04-27		Lap SOS open cholectomy	Gall Bladder Sx | Essential		32	999		General Anaesthesia	Essential	Essential	4	4		Elective
2642	PB File	KEM	Hosp-2	Apr-19	General Surgery	GenSx	2019-04-27		Lap SOS open chole	Gall Bladder Sx | Essential		43	F		General Anaesthesia	Essential	Essential	4	4		Elective
2643	PB File	KEM	Hosp-2	Apr-19	General Surgery	GenSx	2019-04-27		Lap SOS open cholecystomy	Gall Bladder Sx | Essential		26	F		General Anaesthesia	Essential	Essential	4	4		Elective
2644	PB File	KEM	Hosp-2	Apr-19	General Surgery	GenSx	2019-04-26		Lap cholecystectomy	Gall Bladder Sx | Essential		26	F		General Anaesthesia	Essential	Essential	4	4		Elective
2645	PB File	KEM	Hosp-2	Apr-19	General Surgery	GenSx	2019-04-26		Lap cholecystectomy	Gall Bladder Sx | Essential		32	F		General Anaesthesia	Essential	Essential	4	4		Elective
2646	PB File	KEM	Hosp-2	Apr-19	General Surgery	GenSx	2019-04-26		Lap cholecystectomy	Gall Bladder Sx | Essential		47	999		General Anaesthesia	Essential	Essential	4	4		Elective
2647	PB File	KEM	Hosp-2	Apr-19	General Surgery	GenSx	2019-04-23		Lap SOS open cholecystomy	Gall Bladder Sx | Essential		55	F		General Anaesthesia	Essential	Essential	4	4		Elective
2648	PB File	KEM	Hosp-2	Apr-19	General Surgery	GenSx	2019-04-24		Lap cholecystectomy	Gall Bladder Sx | Essential		47	999		General Anaesthesia	Essential	Essential	4	4		Elective
2649	PB File	KEM	Hosp-2	Apr-19	General Surgery	GenSx	2019-04-24		Lap cholecystectomy	Gall Bladder Sx | Essential		50	F		General Anaesthesia	Essential	Essential	4	4		Elective
2650	PB File	KEM	Hosp-2	Apr-19	General Surgery	GenSx	2019-04-17		Lap cholecystectomy	Gall Bladder Sx | Essential		30	999		General Anaesthesia	Essential	Essential	4	4		Elective
2651	PB File	KEM	Hosp-2	Apr-19	General Surgery	GenSx	2019-04-22		Lap cholecystectomy	Gall Bladder Sx | Essential		34	F		General Anaesthesia	Essential	Essential	4	4		Elective
2652	PB File	KEM	Hosp-2	Apr-19	General Surgery	GenSx	2019-04-22		Open Radical cholecystectomy	Gall Bladder Sx | Essential		48	F		General Anaesthesia	Essential	Essential	4	4		Elective
2653	PB File	KEM	Hosp-2	Apr-19	General Surgery	GenSx	2019-04-10		Lap cholecystectomy	Gall Bladder Sx | Essential		32	F		General Anaesthesia	Essential	Essential	4	4		Elective
2654	PB File	KEM	Hosp-2	Apr-19	General Surgery	GenSx	2019-04-04		Lap cholecystectomy	Gall Bladder Sx | Essential		49	F		General Anaesthesia	Essential	Essential	4	4		Elective
2655	PB File	KEM	Hosp-2	Apr-19	General Surgery	GenSx	2019-04-04		Lap cholecystectomy	Gall Bladder Sx | Essential		57	F		General Anaesthesia	Essential	Essential	4	4		Elective
2656	PB File	KEM	Hosp-2	Apr-19	General Surgery	GenSx	2019-04-04		Open Cholecystectomy	Gall Bladder Sx | Essential		55	F		General Anaesthesia	Essential	Essential	4	4		Elective
2657	PB File	KEM	Hosp-2	Apr-19	General Surgery	GenSx	2019-04-04		Lap cholecystectomy	Gall Bladder Sx | Essential		19	F		General Anaesthesia	Essential	Essential	4	4		Elective
2658	PB File	KEM	Hosp-2	Apr-19	General Surgery	GenSx	2019-04-01		Lap cholecystectomy	Gall Bladder Sx | Essential		29	F		General Anaesthesia	Essential	Essential	4	4		Elective
2659	PB File	KEM	Hosp-2	Apr-19	General Surgery	GenSx	2019-04-01		Diagnostic Laproscopy converted to Open Lap Chole	Gall Bladder Sx | Essential		13	999		General Anaesthesia	Essential	Essential	4	4		Elective
2660	PB File	KEM	Hosp-2	Apr-19	General Surgery	GenSx	2019-04-01		Lap cholecystectomy	Gall Bladder Sx | Essential		21	999		General Anaesthesia	Essential	Essential	4	4		Elective
2661	PB File	KEM	Hosp-2	Apr-19	General Surgery	GenSx	2019-04-18		Lap cholecystectomy	Gall Bladder Sx | Essential		35	F		General Anaesthesia	Essential	Essential	4	4		Elective
2662	PB File	KEM	Hosp-2	Apr-19	General Surgery	GenSx	2019-04-18		Lap cholecystectomy	Gall Bladder Sx | Essential		67	999		General Anaesthesia	Essential	Essential	4	4		Elective
2663	PB File	KEM	Hosp-2	Apr-19	General Surgery	GenSx	2019-04-18		Lap cholecystectomy	Gall Bladder Sx | Essential		35	F		General Anaesthesia	Essential	Essential	4	4		Elective
2664	PB File	KEM	Hosp-2	Apr-19	General Surgery	GenSx	2019-04-23		Lap cholecystectomy	Gall Bladder Sx | Essential		42	F		General Anaesthesia	Essential	Essential	4	4		Elective
2665	PB File	KEM	Hosp-2	Apr-19	General Surgery	GenSx	2019-04-23		Lap cholecystectomy	Gall Bladder Sx | Essential		39	F		General Anaesthesia	Essential	Essential	4	4		Elective
2666	PB File	KEM	Hosp-2	Apr-19	General Surgery	GenSx	2019-04-23		Lap cholecystectomy	Gall Bladder Sx | Essential		35	F		General Anaesthesia	Essential	Essential	4	4		Elective
2667	PB File	KEM	Hosp-2	Apr-19	General Surgery	GenSx	2019-04-03		Lap cholecystectomy	Gall Bladder Sx | Essential		43	999		General Anaesthesia	Essential	Essential	4	4		Elective
2668	PB File	KEM	Hosp-2	Apr-19	General Surgery	GenSx	2019-04-03		Lap cholecystectomy	Gall Bladder Sx | Essential		60	F		General Anaesthesia	Essential	Essential	4	4		Elective
2669	PB File	KEM	Hosp-2	Apr-19	General Surgery	GenSx	2019-04-03		Lap cholecystectomy converted to open	Gall Bladder Sx | Essential		31	999		General Anaesthesia	Essential	Essential	4	4		Elective
2670	PB File	KEM	Hosp-2	Apr-19	General Surgery	GenSx	2019-04-02		Lap Cholecystectomy	Gall Bladder Sx | Essential		27	F		General Anaesthesia	Essential	Essential	4	4		Elective
2671	PB File	BARC	Hosp-1	Apr-19	Surgical	GenSx	2019-01-04		Gall bladder surgery	Gall Bladder Sx | Essential		66	M		General Anaesthesia	Essential	Essential	4	4		Elective
2672	PB File	BARC	Hosp-1	Apr-19	Surgical	GenSx	2019-01-04		Gall bladder surgery	Gall Bladder Sx | Essential		18	F		General Anaesthesia	Essential	Essential	4	4		Elective
2673	PB File	BARC	Hosp-1	Apr-19	Surgical	GenSx	2019-03-04		Gall bladder surgery	Gall Bladder Sx | Essential		36	F		General Anaesthesia	Essential	Essential	4	4		Elective
2674	PB File	BARC	Hosp-1	Apr-19	Surgical	GenSx	2019-11-04		Gall bladder surgery	Gall Bladder Sx | Essential		77	M		General Anaesthesia	Essential	Essential	4	4		Elective
2675	PB File	BARC	Hosp-1	Apr-19	Surgical	GenSx	22-04-2019		Gall bladder surgery	Gall Bladder Sx | Essential		26	F		General Anaesthesia	Essential	Essential	4	4		Elective
2676	PB File	BARC	Hosp-1	Apr-19	Surgical	GenSx	24-04-2019		Gall bladder surgery	Gall Bladder Sx | Essential		53	F		General Anaesthesia	Essential	Essential	4	4		Elective
2695	PB File	Manipal	Hosp-4	Apr-19	GeneraL surgery	GenSx	2019-01-04		Laparoscopic cholecystectomy	Gall Bladder Sx | Essential		34	F		General Anaesthesia	Essential	Essential	4	4		Elective
2696	PB File	Manipal	Hosp-4	Apr-19	GeneraL surgery	GenSx	2019-03-04		Laparoscopic cholecystectomy	Gall Bladder Sx | Essential		52	M		General Anaesthesia	Essential	Essential	4	4		Elective
2697	PB File	Manipal	Hosp-4	Apr-19	GeneraL surgery	GenSx	2019-03-04		Laparoscopic cholecystectomy	Gall Bladder Sx | Essential		55	M		General Anaesthesia	Essential	Essential	4	4		Elective
2699	PB File	Manipal	Hosp-4	Apr-19	GeneraL surgery	GenSx	2019-04-04		Laparoscopic cholecystectomy	Gall Bladder Sx | Essential		32	F		General Anaesthesia	Essential	Essential	4	4		Elective
2700	PB File	Manipal	Hosp-4	Apr-19	GeneraL surgery	GenSx	2019-05-04		Laparoscopic cholecystectomy	Gall Bladder Sx | Essential		56	F		General Anaesthesia	Essential	Essential	4	4		Elective
2701	PB File	Manipal	Hosp-4	Apr-19	GeneraL surgery	GenSx	2019-12-04		Laparoscopic cholecystectomy	Gall Bladder Sx | Essential		72	M		General Anaesthesia	Essential	Essential	4	4		Elective
2702	PB File	Manipal	Hosp-4	Apr-19	GeneraL surgery	GenSx	2019-12-04		Laparoscopic cholecystectomy	Gall Bladder Sx | Essential		79	F		General Anaesthesia	Essential	Essential	4	4		Elective
2703	PB File	Manipal	Hosp-4	Apr-19	GeneraL surgery	GenSx	17/4/2019		Laparoscopic cholecystectomy	Gall Bladder Sx | Essential		58	M		General Anaesthesia	Essential	Essential	4	4		Elective
2704	PB File	Manipal	Hosp-4	Apr-19	GeneraL surgery	GenSx	18/4/2019		Laparoscopic cholecystectomy	Gall Bladder Sx | Essential		64	F		General Anaesthesia	Essential	Essential	4	4		Elective
2705	PB File	Manipal	Hosp-4	Apr-19	GeneraL surgery	GenSx	26/4/2019		Laparoscopic cholecystectomy	Gall Bladder Sx | Essential		64	F		General Anaesthesia	Essential	Essential	4	4		Elective
2706	PB File	Manipal	Hosp-4	Apr-19	GeneraL surgery	GenSx	27/4/2019		Laparoscopic cholecystectomy	Gall Bladder Sx | Essential		42	M		General Anaesthesia	Essential	Essential	4	4		Elective
2707	PB File	Manipal	Hosp-4	Apr-19	GeneraL surgery	GenSx	29/4/2019		Laparoscopic cholecystectomy	Gall Bladder Sx | Essential		57	M		General Anaesthesia	Essential	Essential	4	4		Elective
2708	PB File	Manipal	Hosp-4	Apr-19	GeneraL surgery	GenSx	29/4/2019		Laparoscopic cholecystectomy	Gall Bladder Sx | Essential		55	F		General Anaesthesia	Essential	Essential	4	4		Elective
2709	PB File	Manipal	Hosp-4	Apr-19	GeneraL surgery	GenSx	29/4/2019		Laparoscopic cholecystectomy	Gall Bladder Sx | Essential		70	F		General Anaesthesia	Essential	Essential	4	4		Elective
2710	PB File	Manipal	Hosp-4	Apr-19	GeneraL surgery	GenSx	29/4/2019		Laparoscopic cholecystectomy	Gall Bladder Sx | Essential		39	F		General Anaesthesia	Essential	Essential	4	4		Elective
2743	PB File	Terna	Hosp-5	Apr-19	Obstetrics & Gynaecology	ObGy	30/04/2019		VAGINAL HYSTERECTOMY WITH PERINEAL REPAIR WITH B/L SALPHINGECTOMY	Gyne non essential		999	F		Regional Anesthesia: Spinal, Epidural and Regional Blocks	Non-Essential	Non-Essential	4	4		Elective
2744	PB File	Terna	Hosp-5	Apr-19	Obstetrics & Gynaecology	ObGy	30/04/2019		VAGINAL HYSTERECTOMY + PERIANEAL REPAIR + B /L SALPHINGO OOPHERECTOMY	Gyne non essential		999	F		General Anaesthesia	Non-Essential	Non-Essential	4	4		Elective
2745	PB File	KEM	Hosp-2	Apr-19	OBGY	ObGy	2019-04-01		Vaginal Hysterectomy with anterior colporapphy with posterior colpopermeorapphy	Gyne non essential		45	F		Regional Anesthesia: Spinal, Epidural and Regional Blocks	Non-Essential	Non-Essential	4	4		Elective
2746	PB File	KEM	Hosp-2	Apr-19	OBGY	ObGy	2019-04-02		Vaginal Hysterectomy	Gyne non essential		45	F		General Anaesthesia	Non-Essential	Non-Essential	4	4		Elective
2747	PB File	KEM	Hosp-2	Apr-19	OBGY	ObGy	2019-04-09		Vaginal Hysterectomy with anterior colporapphy	Gyne non essential		36	F		Regional Anesthesia: Spinal, Epidural and Regional Blocks	Non-Essential	Non-Essential	4	4		Elective
2748	PB File	KEM	Hosp-2	Apr-19	OBGY	ObGy	2019-04-09		Vaginal Hysterectomy with anterior colporapphy	Gyne non essential		64	F		Regional Anesthesia: Spinal, Epidural and Regional Blocks	Non-Essential	Non-Essential	4	4		Elective
2749	PB File	KEM	Hosp-2	Apr-19	OBGY	ObGy	2019-04-09		Vaginal Hysterectomy with posterior colporapphy	Gyne non essential		40	F		Regional Anesthesia: Spinal, Epidural and Regional Blocks	Non-Essential	Non-Essential	4	4		Elective
2750	PB File	KEM	Hosp-2	Apr-19	OBGY	ObGy	2019-04-12		Vaginal Hysterectomy with anterior colpolopy with posterior calpoperxxxxlogy	Gyne non essential		55	F		Regional Anesthesia: Spinal, Epidural and Regional Blocks	Non-Essential	Non-Essential	4	4		Elective
2751	PB File	KEM	Hosp-2	Apr-19	OBGY	ObGy	2019-04-12		Vaginal Hysterectomy	Gyne non essential		42	F		Regional Anesthesia: Spinal, Epidural and Regional Blocks	Non-Essential	Non-Essential	4	4		Elective
2752	PB File	KEM	Hosp-2	Apr-19	OBGY	ObGy	2019-04-13		Vaginal Hysterectomy	Gyne non essential		49	F		Regional Anesthesia: Spinal, Epidural and Regional Blocks	Non-Essential	Non-Essential	4	4		Elective
2753	PB File	KEM	Hosp-2	Apr-19	OBGY	ObGy	2019-04-16		Vaginal Hysterectomy	Gyne non essential		40	F		Regional Anesthesia: Spinal, Epidural and Regional Blocks	Non-Essential	Non-Essential	4	4		Elective
2754	PB File	KEM	Hosp-2	Apr-19	OBGY	ObGy	2019-04-20		Vaginal Hysterectomy	Gyne non essential		36	F		Regional Anesthesia: Spinal, Epidural and Regional Blocks	Non-Essential	Non-Essential	4	4		Elective
2755	PB File	KEM	Hosp-2	Apr-19	OBGY	ObGy	2019-04-23		Vaginal Hysterectomy with anterior colporrhaphy and posterior colpoperineorrhaphy	Gyne non essential		90	F		Regional Anesthesia: Spinal, Epidural and Regional Blocks	Non-Essential	Non-Essential	4	4		Elective
2756	PB File	KEM	Hosp-2	Apr-19	OBGY	ObGy	2019-04-23		Vaginal hysterectomy	Gyne non essential		35	F		Regional Anesthesia: Spinal, Epidural and Regional Blocks	Non-Essential	Non-Essential	4	4		Elective
2757	PB File	KEM	Hosp-2	Apr-19	OBGY	ObGy	2019-04-23		Vaginal Hysterectomy with anterior colporrhaphy and posterior colpoperineorrhaphy with Kelly's stitch	Gyne non essential		49	F		Regional Anesthesia: Spinal, Epidural and Regional Blocks	Non-Essential	Non-Essential	4	4		Elective
2758	PB File	KEM	Hosp-2	Apr-19	OBGY	ObGy	2019-04-24		Vaginal Hysterectomy with AP repair	Gyne non essential		46	F		Regional Anesthesia: Spinal, Epidural and Regional Blocks	Non-Essential	Non-Essential	4	4		Elective
2759	PB File	KEM	Hosp-2	Apr-19	OBGY	ObGy	2019-04-30		Vaginal Hysterectomy	Gyne non essential		42	F		Regional Anesthesia: Spinal, Epidural and Regional Blocks	Non-Essential	Non-Essential	4	4		Elective
2760	PB File	KEM	Hosp-2	Apr-19	OBGY	ObGy	2019-04-04		Vaginal Exploration	Gyne non essential		23	F		Not available	Non-Essential	Non-Essential	4	4		Elective
2761	PB File	KEM	Hosp-2	Apr-19	OBGY	ObGy	2019-04-16		Vaginal Exploration	Gyne non essential		25	F		Regional Anesthesia: Spinal, Epidural and Regional Blocks	Non-Essential	Non-Essential	4	4		Elective
2765	PB File	MAMC	Hosp-3	Apr-19	Gen.Surgery	GenSx	2019-02-04		EOS for Hydrocele	Hydrocele		28	M		Local anesthesia not supplemented by sedation or GA	Essential	Essential	4	4		Elective
2766	PB File	MAMC	Hosp-3	Apr-19	Gen.Surgery	GenSx	2019-06-04		EOC (Hydrocele)	Hydrocele		48	M		Local anesthesia not supplemented by sedation or GA	Essential	Essential	4	4		Elective
2767	PB File	MAMC	Hosp-3	Apr-19	Gen.Surgery	GenSx	2019-09-04		EOS for Hydrocele	Hydrocele		48	M		Local anesthesia not supplemented by sedation or GA	Essential	Essential	4	4		Elective
2768	PB File	MAMC	Hosp-3	Apr-19	Gen.Surgery	GenSx	2019-09-04		Eversion of Sac	Hydrocele		44	M		Local anesthesia not supplemented by sedation or GA	Essential	Essential	4	4		Elective
2769	PB File	MAMC	Hosp-3	Apr-19	Gen.Surgery	GenSx	2019-10-04		Eos for Hydrocele	Hydrocele		26	M		General Anaesthesia	Essential	Essential	4	4		Elective
2770	PB File	MAMC	Hosp-3	Apr-19	Gen.Surgery	GenSx	2019-12-04		Eversion of Sac	Hydrocele		62	M		Local anesthesia not supplemented by sedation or GA	Essential	Essential	4	4		Elective
2771	PB File	MAMC	Hosp-3	Apr-19	Gen.Surgery	GenSx	2019-04-18		Eversion of Sac	Hydrocele		38	M		Local anesthesia not supplemented by sedation or GA	Essential	Essential	4	4		Elective
2772	PB File	MAMC	Hosp-3	Apr-19	Gen.Surgery	GenSx	2019-04-20		Eversion of Sac	Hydrocele		63	M		Local anesthesia not supplemented by sedation or GA	Essential	Essential	4	4		Elective
2773	PB File	MAMC	Hosp-3	Apr-19	Gen.Surgery	GenSx	2019-04-22		Eversion of Sac	Hydrocele		54	M		Local anesthesia not supplemented by sedation or GA	Essential	Essential	4	4		Elective
2774	PB File	MAMC	Hosp-3	Apr-19	Gen.Surgery	GenSx	2019-04-23		EOS for Hydrocele	Hydrocele		36	M		Local anesthesia not supplemented by sedation or GA	Essential	Essential	4	4		Elective
2775	PB File	MAMC	Hosp-3	Apr-19	Gen.Surgery	GenSx	2019-04-24		Eos for Hydrocele	Hydrocele		30	M		Local anesthesia not supplemented by sedation or GA	Essential	Essential	4	4		Elective
2776	PB File	MAMC	Hosp-3	Apr-19	Gen.Surgery	GenSx	2019-04-24		Eos for Hydrocele	Hydrocele		22	M		Local anesthesia not supplemented by sedation or GA	Essential	Essential	4	4		Elective
2777	PB File	MAMC	Hosp-3	Apr-19	Gen.Surgery	GenSx	2019-04-26		Eversion of Sac	Hydrocele		999	M		Local anesthesia not supplemented by sedation or GA	Essential	Essential	4	4		Elective
2778	PB File	MAMC	Hosp-3	Apr-19	Gen.Surgery	GenSx	2019-04-27		Eversion of Sac	Hydrocele		23	M		Local anesthesia not supplemented by sedation or GA	Essential	Essential	4	4		Elective
2779	PB File	MAMC	Hosp-3	Apr-19	Gen.Surgery	GenSx	2019-04-27		Eversion of Sac	Hydrocele		32	F		Local anesthesia not supplemented by sedation or GA	Essential	Essential	4	4		Elective
2780	PB File	Terna	Hosp-5	Apr-19	General Surgery	GenSx	2019-08-04		RIGHT HYDROCELE REPAIR	Hydrocele		999	M		Regional Anesthesia: Spinal, Epidural and Regional Blocks	Essential	Essential	4	4		Elective
2781	PB File	KEM	Hosp-2	Apr-19	General Surgery	GenSx	2019-04-03		Rt Tunics Vaginal Hydrocore repair	Hydrocele		28	M		Regional Anesthesia: Spinal, Epidural and Regional Blocks	Essential	Essential	4	4		Elective
2782	PB File	KEM	Hosp-2	Apr-19	General Surgery	GenSx	2019-04-04		Rt TVH repair	Hydrocele		52	M		Regional Anesthesia: Spinal, Epidural and Regional Blocks	Essential	Essential	4	4		Elective
2783	PB File	KEM	Hosp-2	Apr-19	General Surgery	GenSx	2019-04-25		Left pyocele drainage hydrocel excision	abscess drainage		39	M		Regional Anesthesia: Spinal, Epidural and Regional Blocks	Essential	Essential	1	1		Elective
2784	PB File	KEM	Hosp-2	Apr-19	General Surgery	GenSx	2019-04-29		Left sided IVH repair	Hydrocele		41	999		General Anaesthesia	Essential	Essential	4	4		Elective
2785	PB File	KEM	Hosp-2	Apr-19	General Surgery	GenSx	2019-04-26		Left TVH repair	Hydrocele		20	999		Regional Anesthesia: Spinal, Epidural and Regional Blocks	Essential	Essential	4	4		Elective
2786	PB File	KEM	Hosp-2	Apr-19	General Surgery	GenSx	2019-04-26		Rt TVH Repair	Hydrocele		37	999		Regional Anesthesia: Spinal, Epidural and Regional Blocks	Essential	Essential	4	4		Elective
2787	PB File	KEM	Hosp-2	Apr-19	General Surgery	GenSx	2019-04-25		B/L TVH Jaboulay Procedure	Hydrocele		28	999		Regional Anesthesia: Spinal, Epidural and Regional Blocks	Essential	Essential	4	4		Elective
2788	PB File	KEM	Hosp-2	Apr-19	General Surgery	GenSx	2019-04-25		Left TVH Jaboulay	Hydrocele		17	999		Regional Anesthesia: Spinal, Epidural and Regional Blocks	Essential	Essential	4	4		Elective
2789	PB File	KEM	Hosp-2	Apr-19	General Surgery	GenSx	2019-04-03		Left TVH repair	Hydrocele		60	999		Regional Anesthesia: Spinal, Epidural and Regional Blocks	Essential	Essential	4	4		Elective
2790	PB File	KEM	Hosp-2	Apr-19	General Surgery	GenSx	2019-04-02		Left TVH repair	Hydrocele		62	999		Regional Anesthesia: Spinal, Epidural and Regional Blocks	Essential	Essential	4	4		Elective
2791	PB File	BARC	Hosp-1	Apr-19	Surgical	GenSx	2019-03-04		Hydrocele	Hydrocele		41	M		Regional Anesthesia: Spinal, Epidural and Regional Blocks	Essential	Essential	4	4		Elective
2792	PB File	BARC	Hosp-1	Apr-19	Surgical	GenSx	2019-10-04		Hydrocele	Hydrocele		61	M		Regional Anesthesia: Spinal, Epidural and Regional Blocks	Essential	Essential	4	4		Elective
2793	PB File	BARC	Hosp-1	Apr-19	Surgical	GenSx	15-04-2019		Hydrocele	Hydrocele		24	M		Local anesthesia not supplemented by sedation or GA	Essential	Essential	4	4		Elective
2794	PB File	BARC	Hosp-1	Apr-19	Surgical	GenSx	22-04-2019		Hydrocele	Hydrocele		73	M		Local anesthesia not supplemented by sedation or GA	Essential	Essential	4	4		Elective
2798	PB File	MAMC	Hosp-3	Apr-19	Gen.Surgery	GenSx	2019-02-04		Exp Laparotomy & Necrosectomy	Laparoscopy/ Laparotomy | Non-Essential		20	M		General Anaesthesia	Essential	Non-Essential	4	4	1	Elective
2799	PB File	MAMC	Hosp-3	Apr-19	Gen.Surgery	GenSx	2019-12-04		Diagnostiv Laparoscopy & Biopsy (TB)	Laparoscopy/ Laparotomy | Non-Essential		35	M		General Anaesthesia	Non-Essential	Non-Essential	4	4		Elective
2800	PB File	MAMC	Hosp-3	Apr-19	Gen.Surgery	GenSx	2019-04-16		Diagnosis Laparoscopy	Laparoscopy/ Laparotomy | Non-Essential		41	F		General Anaesthesia	Non-Essential	Non-Essential	4	4		Elective
2801	PB File	MAMC	Hosp-3	Apr-19	Gen.Surgery	GenSx	2019-04-22		Diagnosis Laparoscopy	Laparoscopy/ Laparotomy | Non-Essential		18	F		General Anaesthesia	Non-Essential	Non-Essential	4	4		Elective
2831	PB File	Terna	Hosp-5	Apr-19	General Surgery	GenSx	2019-02-04		EXPLORATORY LAPROTOMY FOR DUODENAL PERFORATION	Exploratory Laparotomy | Essential	Laparotomy	999	M		General Anaesthesia	Essential	Essential	1	1		Emergency
2832	PB File	Terna	Hosp-5	Apr-19	Obstetrics & Gynaecology	ObGy	2019-08-04		LAPROSCOPIC OVARIAN CYSTECTOMY + OOPHERECTOMY +	Laparoscopy/ Laparotomy | Non-Essential		999	F		General Anaesthesia	Essential	Non-Essential	4	4		Elective
2833	PB File	Terna	Hosp-5	Apr-19	Obstetrics & Gynaecology	ObGy	2019-10-04		LAPRAROSCOPIC HYSTERECTOMY WITH BILATERAL SALPHINGECTOMY	Laparoscopy/ Laparotomy | Non-Essential		999	F		General Anaesthesia	Essential	Non-Essential	4	4		Elective
2834	PB File	Terna	Hosp-5	Apr-19	General Surgery	GenSx	2019-10-04		EXPLORATORY LAPROTOMY FOR CA DESCENDING COLON WITH ANTERIOR RESECTION	Laparoscopy/ Laparotomy | Non-Essential		999	M		General Anaesthesia	Essential	Non-Essential	3	3		Elective
2835	PB File	Terna	Hosp-5	Apr-19	Obstetrics & Gynaecology	ObGy	13/04/2019		LAPROSCOPIC ECTOPIC REMOVAL	Laparoscopy/ Laparotomy | Non-Essential		999	F		General Anaesthesia	Essential	Non-Essential	1	1		Emergency
2836	PB File	Terna	Hosp-5	Apr-19	General Surgery	GenSx	16/04/2019		LAPROSCOPIC RENAL CYST ASPIRATION WITH DROOFING OF LEFT CYST WALL	Laparoscopy/ Laparotomy | Non-Essential		999	M		General Anaesthesia	Essential	Non-Essential	4	4		Elective
2837	PB File	Terna	Hosp-5	Apr-19	Obstetrics & Gynaecology	ObGy	16/04/2019		LAPROSCOPIC HYSTERECTOMY WITH B/L SALPHINGECTOMY	Laparoscopy/ Laparotomy | Non-Essential		999	F		General Anaesthesia	Essential	Non-Essential	4	4		Elective
2838	PB File	KEM	Hosp-2	Apr-19	General Surgery	GenSx	2019-04-22		Diagnostic Lap	Laparoscopy/ Laparotomy | Non-Essential		20	999		General Anaesthesia	Non-Essential	Non-Essential	4	4		Elective
2839	PB File	KEM	Hosp-2	Apr-19	General Surgery	GenSx	2019-04-22		Diagnostic Lap converted to open adeneroxxxxxx	Laparoscopy/ Laparotomy | Non-Essential		20	F		General Anaesthesia	Non-Essential	Non-Essential	4	4		Elective
2840	PB File	KEM	Hosp-2	Apr-19	OBGY	ObGy	2019-04-01		Exploratory Laparotomy with cystercxxxxxx rt sxxxx	Laparoscopy/ Laparotomy | Non-Essential		999	F		Regional Anesthesia: Spinal, Epidural and Regional Blocks	Non-Essential	Non-Essential	4	4		Elective
2841	PB File	KEM	Hosp-2	Apr-19	OBGY	ObGy	2019-04-03		Exploratory Laparotomy with endometric cyst xxxxx with xxxxxxxx	Laparoscopy/ Laparotomy | Non-Essential		999	F		Regional Anesthesia: Spinal, Epidural and Regional Blocks	Non-Essential	Non-Essential	4	4		Elective
2842	PB File	KEM	Hosp-2	Apr-19	OBGY	ObGy	2019-04-05		Exploratory Laparotomy with ovarian cysterectomy with ovarian reconstruction	Laparoscopy/ Laparotomy | Non-Essential		22	F		Regional Anesthesia: Spinal, Epidural and Regional Blocks	Non-Essential	Non-Essential	4	4		Elective
2843	PB File	KEM	Hosp-2	Apr-19	OBGY	ObGy	2019-04-05		Diagnostic Laparotomy with peritoneal fluid collection	Laparoscopy/ Laparotomy | Non-Essential		30	F		General Anaesthesia	Non-Essential	Non-Essential	4	4		Elective
2844	PB File	KEM	Hosp-2	Apr-19	OBGY	ObGy	2019-04-10		Exploratory Laparotomy with B/L salpingo-oophratory	Laparoscopy/ Laparotomy | Non-Essential		58	F		Regional Anesthesia: Spinal, Epidural and Regional Blocks	Essential	Non-Essential	4	4		Elective
2845	PB File	KEM	Hosp-2	Apr-19	OBGY	ObGy	2019-04-11		Diagnostic Hysteroscopy with polypecty and fractional curettage	Laparoscopy/ Laparotomy | Non-Essential		32	F		Sedation	Non-Essential	Non-Essential	4	4		Elective
2846	PB File	KEM	Hosp-2	Apr-19	OBGY	ObGy	2019-04-11		Exploratory Laparotomy with Rt salpingo-oophratory	Laparoscopy/ Laparotomy | Non-Essential		25	F		General Anaesthesia	Essential	Non-Essential	4	4		Elective
2847	PB File	KEM	Hosp-2	Apr-19	OBGY	ObGy	2019-04-11		Diagnostic Laparoscopy xxx exploratory laprotomy with left with peritoneal fluid collection	Laparoscopy/ Laparotomy | Non-Essential		34	F		General Anaesthesia	Non-Essential	Non-Essential	4	4		Elective
2848	PB File	KEM	Hosp-2	Apr-19	OBGY	ObGy	2019-04-12		Diagnostic Cysteo - laparoscopy with choxxxx dicatalial curettage	Laparoscopy/ Laparotomy | Non-Essential		24	F		General Anaesthesia	Non-Essential	Non-Essential	4	4		Elective
2849	PB File	KEM	Hosp-2	Apr-19	OBGY	ObGy	2019-04-12		Diagnostic Laparoscopy with peritoneal fluid collection	Laparoscopy/ Laparotomy | Non-Essential		22	F		General Anaesthesia	Non-Essential	Non-Essential	4	4		Elective
2850	PB File	KEM	Hosp-2	Apr-19	OBGY	ObGy	2019-04-18		Exploratory Laparotomy with B/L ovarian cystectomy with ovarian reconstruction	Laparoscopy/ Laparotomy | Non-Essential		23	F		Regional Anesthesia: Spinal, Epidural and Regional Blocks	Non-Essential	Non-Essential	4	4		Elective
2851	PB File	KEM	Hosp-2	Apr-19	OBGY	ObGy	2019-04-24		Exploratory laparotomy with right salphingo---oophorectomy	Laparoscopy/ Laparotomy | Non-Essential		46	F		Regional Anesthesia: Spinal, Epidural and Regional Blocks	Non-Essential	Non-Essential	4	4		Elective
2852	PB File	KEM	Hosp-2	Apr-19	OBGY	ObGy	2019-04-26		Diagnostic hystero laproscopy with CPT with D and C	Laparoscopy/ Laparotomy | Non-Essential		39	F		General Anaesthesia	Non-Essential	Non-Essential	4	4		Elective
2853	PB File	KEM	Hosp-2	Apr-19	OBGY	ObGy	2019-04-26		Diagnostic hysterolaproscopy with CPT and C and C	Laparoscopy/ Laparotomy | Non-Essential		26	F		General Anaesthesia	Non-Essential	Non-Essential	4	4		Elective
2854	PB File	KEM	Hosp-2	Apr-19	OBGY	ObGy	2019-04-02		Laproscopy guided cervical biopsy with viceral inspection with auetic acid and lugoli iodine and fractional curettage	Laparoscopy/ Laparotomy | Non-Essential		72	F		Sedation	Non-Essential	Non-Essential	4	4		Elective
2855	PB File	KEM	Hosp-2	Apr-19	OBGY	ObGy	2019-04-18		Diagnostic Laparoscopy with xxxxxxx xxxxxxxx	Laparoscopy/ Laparotomy | Non-Essential		26	F		General Anaesthesia	Non-Essential	Non-Essential	4	4		Elective
2856	PB File	BARC	Hosp-1	Apr-19	Surgical	GenSx	2019-03-04		Diagnostic retrograde dye study of ureter	Laparoscopy/ Laparotomy | Non-Essential		22	M		Local anesthesia not supplemented by sedation or GA	Non-Essential	Non-Essential	4	4		Elective
2867	PB File	Manipal	Hosp-4	Apr-19	Gynecology and Obstetrics	ObGy	2019-05-04		Diagnostic Hysteroscopy	Laparoscopy/ Laparotomy | Non-Essential		81	F		General Anaesthesia	Non-Essential	Non-Essential	4	4		Elective
2868	PB File	Manipal	Hosp-4	Apr-19	Gynecology and Obstetrics	ObGy	2019-06-04		Diagnostic hysteroscopy and laparoscopic myomectomy	Laparoscopy/ Laparotomy | Non-Essential		37	F		General Anaesthesia	Non-Essential	Non-Essential	4	4		Elective
2869	PB File	Manipal	Hosp-4	Apr-19	Gynecology and Obstetrics	ObGy	2019-06-04		Diagnostic hysterolaparoscopy	Laparoscopy/ Laparotomy | Non-Essential		24	F		General Anaesthesia	Non-Essential	Non-Essential	4	4		Elective
2870	PB File	Manipal	Hosp-4	Apr-19	GeneraL surgery	GenSx	2019-10-04		Diagnostic laparoscopy, thoracoscpy and pleurodesis	Laparoscopy/ Laparotomy | Non-Essential		62	F		General Anaesthesia	Non-Essential	Non-Essential	4	4		Elective
2871	PB File	Manipal	Hosp-4	Apr-19	Gynecology and Obstetrics	ObGy	2019-10-04		Laparotomy and hematoma evacuation ( post hysterotomy for adherent placenta)	Laparoscopy/ Laparotomy | Non-Essential		29	F		General Anaesthesia	Non-Essential	Non-Essential	4	4		emergency
2891	PB File	KEM	Hosp-2	Apr-19	OBGY	ObGy	2019-04-27		Medical Termination of Pregnancy by suction evacuation B/L Salphingecty	MTP		26	F		Regional Anesthesia: Spinal, Epidural and Regional Blocks	Essential	Essential	1	1		Elective
2892	PB File	KEM	Hosp-2	Apr-19	OBGY	ObGy	2019-04-09		Medical Termination of Pregnancy by suction evacuation intra uterine cut insection	MTP		28	F		Sedation	Essential	Essential	1	1		Elective
2893	PB File	KEM	Hosp-2	Apr-19	OBGY	ObGy	2019-04-17		Medical Termination of Pregnancy by suction evacuation with bilateral tubal ligation	MTP		35	F		Regional Anesthesia: Spinal, Epidural and Regional Blocks	Essential	Essential	1	1		Elective
2894	PB File	KEM	Hosp-2	Apr-19	OBGY	ObGy	2019-04-18		Medical termination of pregnancy with copper T insertion	MTP		25	F		Sedation	Essential	Essential	1	1		Elective
2895	PB File	BARC	Hosp-1	Apr-19	Gynaec	ObGy	2019-03-04		Medical termination of pregnancy	MTP		37	F		Sedation	Non-Essential	Essential	1	1		Elective
2896	PB File	BARC	Hosp-1	Apr-19	Gynaec	ObGy	2019-11-04		Medical termination pregnancy	MTP		40	F		Sedation	Non-Essential	Essential	1	1		Elective
2897	PB File	BARC	Hosp-1	Apr-19	Gynaec	ObGy	16-04-2019		Medical termination pregnancy	MTP		37	F		Sedation	Non-Essential	Essential	1	1		Elective
2902	PB File	Manipal	Hosp-4	Apr-19	Gynecology and Obstetrics	ObGy	16/4/2019		MTP , USG guided	MTP		44	F		General Anaesthesia	Essential	Essential	1	1		Elective
2903	PB File	Manipal	Hosp-4	Apr-19	Gynecology and Obstetrics	ObGy	20/4/2019		MTP and D and C	MTP		31	F		General Anaesthesia	Essential	Essential	1	1		Elective
2906	PB File	MAMC	Hosp-3	Apr-19	Gen.Surgery	GenSx	2019-02-04		Modified Radical Mastectomy- post NACT	Oncology Non essential		40	F		General Anaesthesia	Non-Essential	Non-Essential	2	2		Elective
2907	PB File	MAMC	Hosp-3	Apr-19	Gen.Surgery	GenSx	2019-02-04		Wide local excision (Chest wall tumor)	Oncology Non essential		76	M		General Anaesthesia	Non-Essential	Non-Essential	2	2		Elective
2908	PB File	MAMC	Hosp-3	Apr-19	Gen.Surgery	GenSx	2019-03-04		Modified Radical Mastectomy- post NACT	Oncology Non essential		38	F		General Anaesthesia	Non-Essential	Non-Essential	2	2		Elective
2909	PB File	MAMC	Hosp-3	Apr-19	Gen.Surgery	GenSx	2019-04-04		Modified Radical Mastectomy- Post NACT	Oncology Non essential		61	F		General Anaesthesia	Non-Essential	Non-Essential	2	2		Elective
2910	PB File	MAMC	Hosp-3	Apr-19	Gen.Surgery	GenSx	2019-04-04		Modified Radical Mastectomy	Oncology Non essential		36	F		General Anaesthesia	Non-Essential	Non-Essential	2	2		Elective
2911	PB File	MAMC	Hosp-3	Apr-19	Gen.Surgery	GenSx	2019-04-04		Wide Local Excision - Desmoid Tumor	Oncology Non essential		45	F		General Anaesthesia	Non-Essential	Non-Essential	2	2		Elective
2912	PB File	MAMC	Hosp-3	Apr-19	Gen.Surgery	GenSx	2019-06-04		Modified Radical Mastectomy- post NACT	Oncology Non essential		48	F		General Anaesthesia	Non-Essential	Non-Essential	2	2		Elective
2913	PB File	MAMC	Hosp-3	Apr-19	Gen.Surgery	GenSx	2019-06-04		Modified Radical Mastectomy	Oncology Non essential		30	F		General Anaesthesia	Non-Essential	Non-Essential	2	2		Elective
2914	PB File	MAMC	Hosp-3	Apr-19	Gen.Surgery	GenSx	2019-09-04		Modified Radical Mastectomy- post NACT	Oncology Non essential		75	F		General Anaesthesia	Non-Essential	Non-Essential	2	2		Elective
2915	PB File	MAMC	Hosp-3	Apr-19	Gen.Surgery	GenSx	2019-12-04		Whipples Procedure	Oncology Non essential		60	F		General Anaesthesia	Non-Essential	Non-Essential	3	3		Elective
2916	PB File	MAMC	Hosp-3	Apr-19	Gen.Surgery	GenSx	2019-12-04		Whipples Procedure	Oncology Non essential		41	F		Local anesthesia not supplemented by sedation or GA	Non-Essential	Non-Essential	3	3		Elective
2917	PB File	MAMC	Hosp-3	Apr-19	Gen.Surgery	GenSx	2019-04-16		Modified Radical Mastectomy- post NACT	Oncology Non essential		45	F		General Anaesthesia	Non-Essential	Non-Essential	2	2		Elective
2918	PB File	MAMC	Hosp-3	Apr-19	Gen.Surgery	GenSx	2019-04-16		Modified Radical Mastectomy & reconstruction	Oncology Non essential		24	F		General Anaesthesia	Non-Essential	Non-Essential	2	2		Elective
2919	PB File	MAMC	Hosp-3	Apr-19	Gen.Surgery	GenSx	2019-04-16		Modified Radical Mastectomy- post NACT	Oncology Non essential		62	F		General Anaesthesia	Non-Essential	Non-Essential	2	2		Elective
2920	PB File	MAMC	Hosp-3	Apr-19	Gen.Surgery	GenSx	2019-04-18		Modified Radical Mastectomy- post NACT	Oncology Non essential		30	F		General Anaesthesia	Non-Essential	Non-Essential	2	2		Elective
2921	PB File	MAMC	Hosp-3	Apr-19	Gen.Surgery	GenSx	2019-04-22		Whipples Procedure	Oncology Non essential		58	M		General Anaesthesia	Non-Essential	Non-Essential	3	3		Elective
2922	PB File	MAMC	Hosp-3	Apr-19	Gen.Surgery	GenSx	2019-04-24		Whipples Procedure	Oncology Non essential		51	M		General Anaesthesia	Non-Essential	Non-Essential	3	3		Elective
2923	PB File	MAMC	Hosp-3	Apr-19	Gen.Surgery	GenSx	2019-04-25		MRM	Oncology Non essential		65	F		Local anesthesia not supplemented by sedation or GA	Non-Essential	Non-Essential	2	2		Elective
2924	PB File	MAMC	Hosp-3	Apr-19	Gen.Surgery	GenSx	2019-04-26		Wide Local Excision (Bowel Mass)	Oncology Non essential		25	M		General Anaesthesia	Non-Essential	Non-Essential	2	2		Elective
2925	PB File	MAMC	Hosp-3	Apr-19	Gen.Surgery	GenSx	2019-04-29		Wide Local Excision of thigh mass	Oncology Non essential		32	F		General Anaesthesia	Non-Essential	Non-Essential	2	2		Elective
2926	PB File	MAMC	Hosp-3	Apr-19	Orthopedics	Ortho	2019-04-01		MPFL RECONSRUCTION	Oncology Non essential		17	M		Regional Anesthesia: Spinal, Epidural and Regional Blocks	Non-Essential	Non-Essential	2	2		Elective
2928	PB File	Terna	Hosp-5	Apr-19	General Surgery	GenSx	25/04/2019		MODIFIED RADICAL MASTECTOMY	Oncology Non essential		999	F		General Anaesthesia	Non-Essential	Non-Essential	2	2		Elective
2930	PB File	BARC	Hosp-1	Apr-19	Gynaec	ObGy	2019-02-04		Wartheim'S Operation.	Oncology Non essential		67	F		General Anaesthesia	Non-Essential	Non-Essential	2	2		Elective
2931	PB File	BARC	Hosp-1	Apr-19	Gynaec	ObGy	2019-09-04		Wartheim'S Operation.	Oncology Non essential		52	F		General Anaesthesia	Non-Essential	Non-Essential	2	2		Elective
2943	PB File	MAMC	Hosp-3	Apr-19	Orthopedics	Ortho	2019-01-04		ORIF WITH PLATING	ORIF	Fracture	19	M		General Anaesthesia	Non-Essential	Non-Essential	1	1		Elective
2944	PB File	MAMC	Hosp-3	Apr-19	Orthopedics	Ortho	2019-02-04		ORIF WITH NAILING	ORIF	Fracture	42	M		Regional Anesthesia: Spinal, Epidural and Regional Blocks	Non-Essential	Non-Essential	2	2		Elective
2945	PB File	MAMC	Hosp-3	Apr-19	Orthopedics	Ortho	2019-02-04		ORIF WITH CCS	ORIF	Fracture	35	M		Regional Anesthesia: Spinal, Epidural and Regional Blocks	Non-Essential	Non-Essential	2	2		Elective
2946	PB File	MAMC	Hosp-3	Apr-19	Orthopedics	Ortho	2019-03-04		ORIF WITH PLATING	ORIF	Fracture	35	M		General Anaesthesia	Non-Essential	Non-Essential	1	1		Elective
2947	PB File	MAMC	Hosp-3	Apr-19	Orthopedics	Ortho	2019-03-04		ORIF WITH PLATING WITH EXTERNAL FIXATOR	ORIF	Fracture	22	M		General Anaesthesia	Non-Essential	Non-Essential	2	2		Emergency
2948	PB File	MAMC	Hosp-3	Apr-19	Orthopedics	Ortho	2019-03-04		ORIF WITH TBW	ORIF	Fracture	33	F		Regional Anesthesia: Spinal, Epidural and Regional Blocks	Non-Essential	Non-Essential	2	2		Elective
2949	PB File	MAMC	Hosp-3	Apr-19	Orthopedics	Ortho	2019-04-04		ORIF WITH PLATING	ORIF	Fracture	30	F		Regional Anesthesia: Spinal, Epidural and Regional Blocks	Non-Essential	Non-Essential	1	1		Elective
2950	PB File	MAMC	Hosp-3	Apr-19	Orthopedics	Ortho	2019-04-04		ORIF WITH K WIRE	ORIF	Fracture	20	M		Local anesthesia not supplemented by sedation or GA	Non-Essential	Non-Essential	2	2		Elective
2951	PB File	MAMC	Hosp-3	Apr-19	Orthopedics	Ortho	2019-05-04		ORIF WITH DHS	ORIF	Fracture	84	F		Regional Anesthesia: Spinal, Epidural and Regional Blocks	Non-Essential	Non-Essential	2	2		Elective
2952	PB File	MAMC	Hosp-3	Apr-19	Orthopedics	Ortho	2019-05-04		ORIF WITH CCS	ORIF	Fracture	32	M		Regional Anesthesia: Spinal, Epidural and Regional Blocks	Non-Essential	Non-Essential	2	2		Elective
2953	PB File	MAMC	Hosp-3	Apr-19	Orthopedics	Ortho	2019-05-04		ORIF WITH PLATING	ORIF	Fracture	36	F		Regional Anesthesia: Spinal, Epidural and Regional Blocks	Non-Essential	Non-Essential	1	1		Elective
2954	PB File	MAMC	Hosp-3	Apr-19	Orthopedics	Ortho	2019-06-04		ORIF WITH ILN	ORIF	Fracture	46	M		Regional Anesthesia: Spinal, Epidural and Regional Blocks	Non-Essential	Non-Essential	2	2		Elective
2955	PB File	MAMC	Hosp-3	Apr-19	Orthopedics	Ortho	2019-06-04		ORIF WITH LIGAMENT REPAIR	ORIF	Fracture	45	M		General Anaesthesia	Non-Essential	Non-Essential	2	2		Elective
2956	PB File	MAMC	Hosp-3	Apr-19	Orthopedics	Ortho	2019-06-04		ORIF WITH K WIRE REPAIR	ORIF	Fracture	35	M		General Anaesthesia	Non-Essential	Non-Essential	2	2		Elective
2957	PB File	MAMC	Hosp-3	Apr-19	Orthopedics	Ortho	2019-06-04		ORIF WITH PLATING WITH TBW	ORIF	Fracture	36	M		Regional Anesthesia: Spinal, Epidural and Regional Blocks	Non-Essential	Non-Essential	2	2		Elective
2958	PB File	MAMC	Hosp-3	Apr-19	Orthopedics	Ortho	2019-06-04		EXTERNAL FIXATOR	ORIF	Fracture	24	M		Regional Anesthesia: Spinal, Epidural and Regional Blocks	Essential	Non-Essential	2	2		Emergency
2959	PB File	MAMC	Hosp-3	Apr-19	Orthopedics	Ortho	2019-08-04		ORIF WITH PLATING	ORIF	Fracture	54	M		Regional Anesthesia: Spinal, Epidural and Regional Blocks	Non-Essential	Non-Essential	1	1		Elective
2960	PB File	MAMC	Hosp-3	Apr-19	Orthopedics	Ortho	2019-08-04		ORIF WITH TBW	ORIF	Fracture	44	M		Regional Anesthesia: Spinal, Epidural and Regional Blocks	Non-Essential	Non-Essential	2	2		Elective
2961	PB File	MAMC	Hosp-3	Apr-19	Orthopedics	Ortho	2019-09-04		EXTERNAL FIXATOR APPLICATION	ORIF	Fracture	40	M		Regional Anesthesia: Spinal, Epidural and Regional Blocks	Essential	Non-Essential	2	2		Elective
2962	PB File	MAMC	Hosp-3	Apr-19	Orthopedics	Ortho	2019-09-04		EXTERNAL FIXATOR	ORIF	Fracture	23	M		Regional Anesthesia: Spinal, Epidural and Regional Blocks	Essential	Non-Essential	2	2		Emergency
2963	PB File	MAMC	Hosp-3	Apr-19	Orthopedics	Ortho	2019-10-04		ORIF WITH CCS	ORIF	Fracture	47	F		Regional Anesthesia: Spinal, Epidural and Regional Blocks	Non-Essential	Non-Essential	2	2		Elective
2964	PB File	MAMC	Hosp-3	Apr-19	Orthopedics	Ortho	2019-11-04		ORIF WITH VOLAR PLATING	ORIF	Fracture	35	M		Regional Anesthesia: Spinal, Epidural and Regional Blocks	Non-Essential	Non-Essential	2	2		Elective
2965	PB File	MAMC	Hosp-3	Apr-19	Orthopedics	Ortho	2019-11-04		ORIF WITH CCS	ORIF	Fracture	56	M		Regional Anesthesia: Spinal, Epidural and Regional Blocks	Non-Essential	Non-Essential	2	2		Elective
2966	PB File	MAMC	Hosp-3	Apr-19	Orthopedics	Ortho	13/4/2019		ORIF WITH DHS	ORIF	Fracture	65	M		Regional Anesthesia: Spinal, Epidural and Regional Blocks	Non-Essential	Non-Essential	2	2		Elective
2967	PB File	MAMC	Hosp-3	Apr-19	Orthopedics	Ortho	14/4/2019		ORIF WITH CCS	ORIF	Fracture	13	F		Regional Anesthesia: Spinal, Epidural and Regional Blocks	Non-Essential	Non-Essential	2	2		Elective
2968	PB File	MAMC	Hosp-3	Apr-19	Orthopedics	Ortho	14/4/2019		ORIF WITH PLATING	ORIF	Fracture	22	M		General Anaesthesia	Non-Essential	Non-Essential	1	1		Elective
2969	PB File	MAMC	Hosp-3	Apr-19	Orthopedics	Ortho	14/4/2019		ORIF WITH PLATING	ORIF	Fracture	60	M		General Anaesthesia	Non-Essential	Non-Essential	1	1		Elective
2970	PB File	MAMC	Hosp-3	Apr-19	Orthopedics	Ortho	14/4/2019		ORIF WITH PLATING	ORIF	Fracture	14	F		General Anaesthesia	Non-Essential	Non-Essential	1	1		Elective
2971	PB File	MAMC	Hosp-3	Apr-19	Orthopedics	Ortho	15/4/2019		ORIF WITH TBW WITH PLATING WITH EXTERNAL FIXATOR	ORIF	Fracture	35	M		General Anaesthesia	Non-Essential	Non-Essential	2	2		Elective
2972	PB File	MAMC	Hosp-3	Apr-19	Orthopedics	Ortho	15/4/2019		ORIF WITH DFN WITH ILN	ORIF	Fracture	55	M		Regional Anesthesia: Spinal, Epidural and Regional Blocks	Non-Essential	Non-Essential	2	2		Elective
2973	PB File	MAMC	Hosp-3	Apr-19	Orthopedics	Ortho	15/4/2019		ORIF WITH PLATING WITH TBW	ORIF	Fracture	61	F		Regional Anesthesia: Spinal, Epidural and Regional Blocks	Non-Essential	Non-Essential	2	2		Elective
2974	PB File	MAMC	Hosp-3	Apr-19	Orthopedics	Ortho	15/4/2019		ORIF WITH CCS	ORIF	Fracture	35	M		Regional Anesthesia: Spinal, Epidural and Regional Blocks	Non-Essential	Non-Essential	2	2		Elective
2975	PB File	MAMC	Hosp-3	Apr-19	Orthopedics	Ortho	16/4/2019		ORIF WITH PLATING	ORIF	Fracture	32	M		General Anaesthesia	Non-Essential	Non-Essential	1	1		Elective
2976	PB File	MAMC	Hosp-3	Apr-19	Orthopedics	Ortho	16/4/2019		EXTERNAL FIXATOR	ORIF	Fracture	35	F		Regional Anesthesia: Spinal, Epidural and Regional Blocks	Essential	Non-Essential	2	2		Emergency
2977	PB File	MAMC	Hosp-3	Apr-19	Orthopedics	Ortho	18/4/2019		ORIF WITH DHS	ORIF	Fracture	60	F		Regional Anesthesia: Spinal, Epidural and Regional Blocks	Non-Essential	Non-Essential	2	2		Elective
2978	PB File	MAMC	Hosp-3	Apr-19	Orthopedics	Ortho	18/4/2019		ORIF WITH ILN	ORIF	Fracture	30	M		Regional Anesthesia: Spinal, Epidural and Regional Blocks	Non-Essential	Non-Essential	2	2		Elective
2979	PB File	MAMC	Hosp-3	Apr-19	Orthopedics	Ortho	18/4/2019		ORIF WITH DHS	ORIF	Fracture	24	M		Regional Anesthesia: Spinal, Epidural and Regional Blocks	Non-Essential	Non-Essential	2	2		Elective
2980	PB File	MAMC	Hosp-3	Apr-19	Orthopedics	Ortho	19/4/2019		ORIF WITH CCS	ORIF	Fracture	13	M		Regional Anesthesia: Spinal, Epidural and Regional Blocks	Non-Essential	Non-Essential	2	2		Elective
2981	PB File	MAMC	Hosp-3	Apr-19	Orthopedics	Ortho	19/4/2019		ORIF WITH TBW	ORIF	Fracture	33	M		Regional Anesthesia: Spinal, Epidural and Regional Blocks	Non-Essential	Non-Essential	2	2		Elective
2982	PB File	MAMC	Hosp-3	Apr-19	Orthopedics	Ortho	20/4/2019		ORIF WITH PLATING	ORIF	Fracture	30	M		General Anaesthesia	Non-Essential	Non-Essential	1	1		Elective
2983	PB File	MAMC	Hosp-3	Apr-19	Orthopedics	Ortho	21/4/2019		ORIF WITH DHS	ORIF	Fracture	75	F		Regional Anesthesia: Spinal, Epidural and Regional Blocks	Non-Essential	Non-Essential	2	2		Elective
2984	PB File	MAMC	Hosp-3	Apr-19	Orthopedics	Ortho	21/4/2019		ORIF WITH TBW	ORIF	Fracture	32	F		Regional Anesthesia: Spinal, Epidural and Regional Blocks	Non-Essential	Non-Essential	2	2		Elective
2985	PB File	MAMC	Hosp-3	Apr-19	Orthopedics	Ortho	22/4/2019		ORIF WITH PLATING	ORIF	Fracture	42	M		Regional Anesthesia: Spinal, Epidural and Regional Blocks	Non-Essential	Non-Essential	1	1		Elective
2986	PB File	MAMC	Hosp-3	Apr-19	Orthopedics	Ortho	22/4/2019		EXTERNAL FIXATOR APPLICATION	ORIF	Fracture	32	M		Regional Anesthesia: Spinal, Epidural and Regional Blocks	Essential	Non-Essential	2	2		Emergency
2987	PB File	MAMC	Hosp-3	Apr-19	Orthopedics	Ortho	22/4/2019		ORIF WITH DHS	ORIF	Fracture	60	M		Regional Anesthesia: Spinal, Epidural and Regional Blocks	Non-Essential	Non-Essential	2	2		Elective
2988	PB File	MAMC	Hosp-3	Apr-19	Orthopedics	Ortho	23/4/2019		ORIF WITH PLATING	ORIF	Fracture	25	M		Regional Anesthesia: Spinal, Epidural and Regional Blocks	Non-Essential	Non-Essential	1	1		Elective
2989	PB File	MAMC	Hosp-3	Apr-19	Orthopedics	Ortho	23/4/2019		ORIF	ORIF	Fracture	42	M		Regional Anesthesia: Spinal, Epidural and Regional Blocks	Non-Essential	Non-Essential	1	1		Elective
2990	PB File	MAMC	Hosp-3	Apr-19	Orthopedics	Ortho	24/4/2019		ORIF WITH PLATING	ORIF	Fracture	18	M		General Anaesthesia	Non-Essential	Non-Essential	1	1		Elective
2991	PB File	MAMC	Hosp-3	Apr-19	Orthopedics	Ortho	24/4/2019		ORIF WITH DHS	ORIF	Fracture	75	F		Regional Anesthesia: Spinal, Epidural and Regional Blocks	Non-Essential	Non-Essential	2	2		Elective
2992	PB File	MAMC	Hosp-3	Apr-19	Orthopedics	Ortho	25/4/2019		ORIF WITH TBW	ORIF	Fracture	48	M		Regional Anesthesia: Spinal, Epidural and Regional Blocks	Non-Essential	Non-Essential	2	2		Elective
2993	PB File	MAMC	Hosp-3	Apr-19	Orthopedics	Ortho	26/4/2019		ORIF WITH PLATING	ORIF	Fracture	42	M		Regional Anesthesia: Spinal, Epidural and Regional Blocks	Non-Essential	Non-Essential	1	1		Elective
2994	PB File	MAMC	Hosp-3	Apr-19	Orthopedics	Ortho	26/4/2019		ORIF WITH PLATING	ORIF	Fracture	15	F		General Anaesthesia	Non-Essential	Non-Essential	1	1		Elective
2995	PB File	MAMC	Hosp-3	Apr-19	Orthopedics	Ortho	27/4/2019		ORIF WITH PLATING	ORIF	Fracture	26	M		General Anaesthesia	Non-Essential	Non-Essential	1	1		Elective
2996	PB File	MAMC	Hosp-3	Apr-19	Orthopedics	Ortho	27/4/2019		ORIF WITH DHS	ORIF	Fracture	90	M		Regional Anesthesia: Spinal, Epidural and Regional Blocks	Non-Essential	Non-Essential	2	2		Elective
2997	PB File	MAMC	Hosp-3	Apr-19	Orthopedics	Ortho	27/4/2019		ORIF WITH PLATINH	ORIF	Fracture	40	M		Regional Anesthesia: Spinal, Epidural and Regional Blocks	Non-Essential	Non-Essential	2	2		Elective
2998	PB File	MAMC	Hosp-3	Apr-19	Orthopedics	Ortho	29/4/2019		ORIF WITH DHS	ORIF	Fracture	85	F		Regional Anesthesia: Spinal, Epidural and Regional Blocks	Non-Essential	Non-Essential	2	2		Elective
2999	PB File	MAMC	Hosp-3	Apr-19	Orthopedics	Ortho	29/4/2019		ORIF WITH DHS	ORIF	Fracture	75	F		Regional Anesthesia: Spinal, Epidural and Regional Blocks	Non-Essential	Non-Essential	2	2		Elective
3000	PB File	MAMC	Hosp-3	Apr-19	Orthopedics	Ortho	30/4/2019		ORIF WITH PLATING	ORIF	Fracture	27	M		Regional Anesthesia: Spinal, Epidural and Regional Blocks	Non-Essential	Non-Essential	1	1		Elective
3001	PB File	MAMC	Hosp-3	Apr-19	Orthopedics	Ortho	30/4/2019		ORIF WITH CCS WITH PLATING	ORIF	Fracture	65	F		Regional Anesthesia: Spinal, Epidural and Regional Blocks	Non-Essential	Non-Essential	2	2		Elective
3002	PB File	MAMC	Hosp-3	Apr-19	Orthopedics	Ortho	30/4/2019		ORIF WITH CCS	ORIF	Fracture	30	M		Regional Anesthesia: Spinal, Epidural and Regional Blocks	Non-Essential	Non-Essential	2	2		Elective
3003	PB File	MAMC	Hosp-3	Apr-19	Orthopedics	Ortho	2019-04-01		ORIF WITH PLATING	ORIF	Fracture	40	M		Regional Anesthesia: Spinal, Epidural and Regional Blocks	Non-Essential	Non-Essential	1	1		Emergency
3004	PB File	MAMC	Hosp-3	Apr-19	Orthopedics	Ortho	2019-04-02		ORIF WITH DFLP	ORIF	Fracture	22	M		Regional Anesthesia: Spinal, Epidural and Regional Blocks	Non-Essential	Non-Essential	2	2		Emergency
3005	PB File	MAMC	Hosp-3	Apr-19	Orthopedics	Ortho	2019-04-03		ORIF WITH PLATING	ORIF	Fracture	18	M		Regional Anesthesia: Spinal, Epidural and Regional Blocks	Non-Essential	Non-Essential	1	1		Emergency
3006	PB File	MAMC	Hosp-3	Apr-19	Orthopedics	Ortho	2019-04-03		ORIF WITH TBW	ORIF	Fracture	55	F		Regional Anesthesia: Spinal, Epidural and Regional Blocks	Non-Essential	Non-Essential	2	2		Emergency
3007	PB File	MAMC	Hosp-3	Apr-19	Orthopedics	Ortho	2019-04-04		ORIF WITH PLATING	ORIF	Fracture	55	M		Regional Anesthesia: Spinal, Epidural and Regional Blocks	Non-Essential	Non-Essential	1	1		Emergency
3008	PB File	MAMC	Hosp-3	Apr-19	Orthopedics	Ortho	2019-04-05		ORIF WITH PLATING	ORIF	Fracture	27	F		Regional Anesthesia: Spinal, Epidural and Regional Blocks	Non-Essential	Non-Essential	1	1		Emergency
3009	PB File	MAMC	Hosp-3	Apr-19	Orthopedics	Ortho	2019-04-05		ORIF WITH PLATING	ORIF	Fracture	55	F		General Anaesthesia	Non-Essential	Non-Essential	1	1		Emergency
3010	PB File	MAMC	Hosp-3	Apr-19	Orthopedics	Ortho	2019-04-06		® ILN WITH HOFFA 'S FIXATION	ORIF	Fracture	22	M		Regional Anesthesia: Spinal, Epidural and Regional Blocks	Non-Essential	Non-Essential	2	2		Emergency
3011	PB File	MAMC	Hosp-3	Apr-19	Orthopedics	Ortho	2019-04-06		EXTENDED CURETTAGE WITH BONE GRAFT	ORIF	Fracture	45	M		Regional Anesthesia: Spinal, Epidural and Regional Blocks	Essential	Non-Essential	2	2		Elective
3012	PB File	MAMC	Hosp-3	Apr-19	Orthopedics	Ortho	2019-04-09		ORIF WITH K-WIRE WITH RADIAL NERVE EXPLORATION	ORIF	Fracture	6	F		General Anaesthesia	Non-Essential	Non-Essential	2	2		Emergency
3013	PB File	MAMC	Hosp-3	Apr-19	Orthopedics	Ortho	2019-04-09		ORIF WITH ILN	ORIF	Fracture	65	F		Regional Anesthesia: Spinal, Epidural and Regional Blocks	Non-Essential	Non-Essential	2	2		Emergency
3014	PB File	MAMC	Hosp-3	Apr-19	Orthopedics	Ortho	2019-04-09		EXTERNAL FIXATOR	ORIF	Fracture	23	M		Regional Anesthesia: Spinal, Epidural and Regional Blocks	Essential	Non-Essential	2	2		Emergency
3015	PB File	MAMC	Hosp-3	Apr-19	Orthopedics	Ortho	2019-04-09		ORIF WITH K-WIRE	ORIF	Fracture	11	M		General Anaesthesia	Non-Essential	Non-Essential	2	2		Emergency
3016	PB File	MAMC	Hosp-3	Apr-19	Orthopedics	Ortho	2019-04-11		ORIF WITH K-WIRE	ORIF	Fracture	1	F		General Anaesthesia	Non-Essential	Non-Essential	2	2		Emergency
3017	PB File	MAMC	Hosp-3	Apr-19	Orthopedics	Ortho	2019-04-11		ORIF WITH K-WIRE	ORIF	Fracture	18	M		General Anaesthesia	Non-Essential	Non-Essential	2	2		Emergency
3018	PB File	MAMC	Hosp-3	Apr-19	Orthopedics	Ortho	2019-04-12		EXTERNAL FIXATION	ORIF	Fracture	60	F		General Anaesthesia	Essential	Non-Essential	1	1		Emergency
3019	PB File	MAMC	Hosp-3	Apr-19	Orthopedics	Ortho	2019-04-12		ORIF WITH LATTARJET PROCEDURE	ORIF	Fracture	52	F		General Anaesthesia	Non-Essential	Non-Essential	2	2		Elective
3020	PB File	MAMC	Hosp-3	Apr-19	Orthopedics	Ortho	2019-04-12		ORIF WITH PLATTING	ORIF	Fracture	60	F		General Anaesthesia	Non-Essential	Non-Essential	2	2		Emergency
3021	PB File	MAMC	Hosp-3	Apr-19	Orthopedics	Ortho	2019-04-16		ORIF WITH TENS	ORIF	Fracture	14	M		General Anaesthesia	Non-Essential	Non-Essential	2	2		Emergency
3022	PB File	MAMC	Hosp-3	Apr-19	Orthopedics	Ortho	2019-04-18		ORIF WITH PLATTING	ORIF	Fracture	40	M		General Anaesthesia	Non-Essential	Non-Essential	2	2		Emergency
3023	PB File	MAMC	Hosp-3	Apr-19	Orthopedics	Ortho	2019-04-22		ORIF WITH PLATTING WITH BG	ORIF	Fracture	35	F		General Anaesthesia	Non-Essential	Non-Essential	2	2		Emergency
3024	PB File	MAMC	Hosp-3	Apr-19	Orthopedics	Ortho	2019-04-23		ORIF WITH K WIRE FIXATION	ORIF	Fracture	7	M		General Anaesthesia	Non-Essential	Non-Essential	2	2		Emergency
3025	PB File	MAMC	Hosp-3	Apr-19	Orthopedics	Ortho	2019-04-25		ORIF WITH CCS	ORIF	Fracture	30	M		Regional Anesthesia: Spinal, Epidural and Regional Blocks	Non-Essential	Non-Essential	2	2		Emergency
3026	PB File	MAMC	Hosp-3	Apr-19	Orthopedics	Ortho	2019-04-25		ORIF WITH ILN	ORIF	Fracture	30	M		Regional Anesthesia: Spinal, Epidural and Regional Blocks	Non-Essential	Non-Essential	2	2		Emergency
3027	PB File	MAMC	Hosp-3	Apr-19	Orthopedics	Ortho	2029-04-26		ORIF WITH PLATING WITH NERVE EXPLORATION & BG	ORIF	Fracture	40	F		General Anaesthesia	Non-Essential	Non-Essential	2	2		Emergency
3028	PB File	MAMC	Hosp-3	Apr-19	Orthopedics	Ortho	2019-04-26		ORIF WITH PLATING	ORIF	Fracture	55	F		Regional Anesthesia: Spinal, Epidural and Regional Blocks	Non-Essential	Non-Essential	1	1		Emergency
3029	PB File	MAMC	Hosp-3	Apr-19	Orthopedics	Ortho	2019-04-27		ORIF WITH PLATING	ORIF	Fracture	34	M		Regional Anesthesia: Spinal, Epidural and Regional Blocks	Non-Essential	Non-Essential	1	1		Emergency
3030	PB File	MAMC	Hosp-3	Apr-19	Ortho Em	Ortho	2019-01-04		ORIF and Plating	ORIF	Fracture	24	M		General Anaesthesia	Non-Essential	Non-Essential	2	2		Emergency
3031	PB File	MAMC	Hosp-3	Apr-19	Ortho Em	Ortho	2019-02-04		ORIF & CCS/TBW	ORIF	Fracture	40	M		Regional Anesthesia: Spinal, Epidural and Regional Blocks	Non-Essential	Non-Essential	2	2		Emergency
3032	PB File	MAMC	Hosp-3	Apr-19	Ortho Em	Ortho	2019-02-04		External Fixator	ORIF	Fracture	23	M		Regional Anesthesia: Spinal, Epidural and Regional Blocks	Essential	Non-Essential	2	2		Emergency
3033	PB File	MAMC	Hosp-3	Apr-19	Ortho Em	Ortho	2019-03-04		ORIF and Plating	ORIF	Fracture	40	M		General Anaesthesia	Non-Essential	Non-Essential	2	2		Emergency
3034	PB File	MAMC	Hosp-3	Apr-19	Ortho Em	Ortho	2019-04-04		ORIF and Plating	ORIF	Fracture	22	M		General Anaesthesia	Non-Essential	Non-Essential	2	2		Emergency
3035	PB File	MAMC	Hosp-3	Apr-19	Ortho Em	Ortho	2019-04-04		ORIF and Plating	ORIF	Fracture	28	M		General Anaesthesia	Non-Essential	Non-Essential	2	2		Emergency
3036	PB File	MAMC	Hosp-3	Apr-19	Ortho Em	Ortho	2019-05-04		ORIF (BB forearm)	ORIF	Fracture	14	M		General Anaesthesia	Non-Essential	Non-Essential	2	2		Emergency
3037	PB File	MAMC	Hosp-3	Apr-19	Ortho Em	Ortho	2019-05-04		ORIF and Plating	ORIF	Fracture	17	M		General Anaesthesia	Non-Essential	Non-Essential	2	2		Emergency
3038	PB File	MAMC	Hosp-3	Apr-19	Ortho Em	Ortho	2019-06-04		ORIF and Plating	ORIF	Fracture	65	F		General Anaesthesia	Non-Essential	Non-Essential	2	2		Emergency
3039	PB File	MAMC	Hosp-3	Apr-19	Ortho Em	Ortho	2019-06-04		ORIF & K-wire	ORIF	Fracture	4	M		General Anaesthesia	Non-Essential	Non-Essential	2	2		Emergency
3040	PB File	MAMC	Hosp-3	Apr-19	Ortho Em	Ortho	2019-07-04		Implant removal + ORIF Plating	ORIF	Fracture	60	F		General Anaesthesia	Non-Essential	Non-Essential	2	2		Emergency
3041	PB File	MAMC	Hosp-3	Apr-19	Ortho Em	Ortho	2019-07-04		ORIF + TBW	ORIF	Fracture	40	M		Regional Anesthesia: Spinal, Epidural and Regional Blocks	Non-Essential	Non-Essential	2	2		Emergency
3042	PB File	MAMC	Hosp-3	Apr-19	Ortho Em	Ortho	2019-08-04		External Fixation Wound Debridement	ORIF	Fracture	6	M		General Anaesthesia	Non-Essential	Non-Essential	1	1		Emergency
3043	PB File	MAMC	Hosp-3	Apr-19	Ortho Em	Ortho	2019-10-04		ORIF C Plating	ORIF	Fracture	18	M		General Anaesthesia	Non-Essential	Non-Essential	2	2		Emergency
3044	PB File	MAMC	Hosp-3	Apr-19	Ortho Em	Ortho	2019-10-04		ORIF + Plating /TBW	ORIF	Fracture	37	F		General Anaesthesia	Non-Essential	Non-Essential	2	2		Emergency
3045	PB File	MAMC	Hosp-3	Apr-19	Ortho Em	Ortho	2019-11-04		ORIF + Plating	ORIF	Fracture	28	M		General Anaesthesia	Non-Essential	Non-Essential	2	2		Emergency
3046	PB File	MAMC	Hosp-3	Apr-19	Ortho Em	Ortho	2019-11-04		ORIF	ORIF	Fracture	51	M		General Anaesthesia	Non-Essential	Non-Essential	1	1		Emergency
3047	PB File	MAMC	Hosp-3	Apr-19	Ortho Em	Ortho	2019-12-04		Wound wash+Debridement +TBW	ORIF	Fracture	25	M		General Anaesthesia	Non-Essential	Non-Essential	2	2		Emergency
3048	PB File	MAMC	Hosp-3	Apr-19	Ortho Em	Ortho	2019-12-04		ORIF Plating	ORIF	Fracture	30	M		General Anaesthesia	Non-Essential	Non-Essential	2	2		Emergency
3049	PB File	MAMC	Hosp-3	Apr-19	Ortho Em	Ortho	2019-04-13		ORIF + Plating	ORIF	Fracture	32	M		General Anaesthesia	Non-Essential	Non-Essential	2	2		Emergency
3050	PB File	MAMC	Hosp-3	Apr-19	Ortho Em	Ortho	2019-04-13		ORIF + Plating	ORIF	Fracture	26	F		General Anaesthesia	Non-Essential	Non-Essential	2	2		Emergency
3051	PB File	MAMC	Hosp-3	Apr-19	Ortho Em	Ortho	2019-04-13		ORIF & Plating	ORIF	Fracture	30	M		General Anaesthesia	Non-Essential	Non-Essential	2	2		Emergency
3052	PB File	MAMC	Hosp-3	Apr-19	Ortho Em	Ortho	2019-04-13		ORIF C Plating	ORIF	Fracture	11	M		General Anaesthesia	Non-Essential	Non-Essential	2	2		Emergency
3053	PB File	MAMC	Hosp-3	Apr-19	Ortho Em	Ortho	2019-04-14		ORIF & Plating	ORIF	Fracture	10	M		General Anaesthesia	Non-Essential	Non-Essential	2	2		Emergency
3054	PB File	MAMC	Hosp-3	Apr-19	Ortho Em	Ortho	2019-04-14		Fracture reduction & Revision of fixator	ORIF	Fracture	2	M		General Anaesthesia	Essential	Non-Essential	2	2		Emergency
3055	PB File	MAMC	Hosp-3	Apr-19	Ortho Em	Ortho	2019-04-14		Fracture reduction and ext Fixator	ORIF	Fracture	35	M		General Anaesthesia	Essential	Non-Essential	2	2		Emergency
3056	PB File	MAMC	Hosp-3	Apr-19	Ortho Em	Ortho	2019-04-15		ORIF C K-wire fixation	ORIF	Fracture	7	M		General Anaesthesia	Non-Essential	Non-Essential	2	2		Emergency
3057	PB File	MAMC	Hosp-3	Apr-19	Ortho Em	Ortho	2019-04-15		Ext .Fixator	ORIF	Fracture	20	M		Regional Anesthesia: Spinal, Epidural and Regional Blocks	Essential	Non-Essential	2	2		Emergency
3058	PB File	MAMC	Hosp-3	Apr-19	Ortho Em	Ortho	2019-04-16		ORIF (BB forearm)	ORIF	Fracture	14	M		General Anaesthesia	Non-Essential	Non-Essential	2	2		Emergency
3059	PB File	MAMC	Hosp-3	Apr-19	Ortho Em	Ortho	2019-04-16		Ext .Fixator	ORIF	Fracture	80	M		Regional Anesthesia: Spinal, Epidural and Regional Blocks	Essential	Non-Essential	2	2		Emergency
3060	PB File	MAMC	Hosp-3	Apr-19	Ortho Em	Ortho	2019-04-17		Ext .Fixator + Vascular Repair	ORIF	Fracture	50	M		General Anaesthesia	Essential	Non-Essential	2	2		Emergency
3061	PB File	MAMC	Hosp-3	Apr-19	Ortho Em	Ortho	2019-04-17		ORIF C K-wire	ORIF	Fracture	10	M		General Anaesthesia	Non-Essential	Non-Essential	2	2		Emergency
3062	PB File	MAMC	Hosp-3	Apr-19	Ortho Em	Ortho	2019-04-18		ORIF	ORIF	Fracture	30	M		Regional Anesthesia: Spinal, Epidural and Regional Blocks	Non-Essential	Non-Essential	1	1		Emergency
3063	PB File	MAMC	Hosp-3	Apr-19	Ortho Em	Ortho	2019-04-19		ORIF & Plating	ORIF	Fracture	45	M		Regional Anesthesia: Spinal, Epidural and Regional Blocks	Non-Essential	Non-Essential	2	2		Emergency
3064	PB File	MAMC	Hosp-3	Apr-19	Ortho Em	Ortho	2019-04-19		ORIF	ORIF	Fracture	50	M		Regional Anesthesia: Spinal, Epidural and Regional Blocks	Non-Essential	Non-Essential	1	1		Emergency
3065	PB File	MAMC	Hosp-3	Apr-19	Ortho Em	Ortho	2019-04-20		ORIF K-wire	ORIF	Fracture	12	M		General Anaesthesia	Non-Essential	Non-Essential	2	2		Emergency
3066	PB File	MAMC	Hosp-3	Apr-19	Ortho Em	Ortho	2019-04-21		Ext Fixator & Vascular Repair	ORIF	Fracture	45	M		General Anaesthesia	Essential	Non-Essential	2	2		Emergency
3067	PB File	MAMC	Hosp-3	Apr-19	Ortho Em	Ortho	2019-04-21		ORIF TBW	ORIF	Fracture	15	M		General Anaesthesia	Non-Essential	Non-Essential	2	2		Emergency
3068	PB File	MAMC	Hosp-3	Apr-19	Ortho Em	Ortho	2019-04-21		ORIF TBW	ORIF	Fracture	29	M		General Anaesthesia	Non-Essential	Non-Essential	2	2		Emergency
3069	PB File	MAMC	Hosp-3	Apr-19	Ortho Em	Ortho	2019-04-22		Knee disarticulation +ORIF K-NAIL	ORIF	Fracture	60	M		Regional Anesthesia: Spinal, Epidural and Regional Blocks	Non-Essential	Non-Essential	2	2		Emergency
3070	PB File	MAMC	Hosp-3	Apr-19	Ortho Em	Ortho	2019-04-22		ORIF TBW	ORIF	Fracture	27	M		General Anaesthesia	Non-Essential	Non-Essential	2	2		Emergency
3071	PB File	MAMC	Hosp-3	Apr-19	Ortho Em	Ortho	2019-04-23		Ext Fixator	ORIF	Fracture	31	M		Regional Anesthesia: Spinal, Epidural and Regional Blocks	Essential	Non-Essential	2	2		Emergency
3072	PB File	MAMC	Hosp-3	Apr-19	Ortho Em	Ortho	2019-04-23		ORIF & Plating	ORIF	Fracture	22	F		General Anaesthesia	Non-Essential	Non-Essential	2	2		Emergency
3073	PB File	MAMC	Hosp-3	Apr-19	Ortho Em	Ortho	2019-04-23		ORIF (BB forearm)	ORIF	Fracture	30	M		General Anaesthesia	Non-Essential	Non-Essential	2	2		Emergency
3074	PB File	MAMC	Hosp-3	Apr-19	Ortho Em	Ortho	2019-04-24		ORIF & TBW + Planting	ORIF	Fracture	50	M		Regional Anesthesia: Spinal, Epidural and Regional Blocks	Non-Essential	Non-Essential	2	2		Emergency
3075	PB File	MAMC	Hosp-3	Apr-19	Ortho Em	Ortho	2019-04-24		Debridemant ( Ext Fixtator)	ORIF	Fracture	33	M		General Anaesthesia	Non-Essential	Non-Essential	2	2		Emergency
3076	PB File	MAMC	Hosp-3	Apr-19	Ortho Em	Ortho	2019-04-24		ORIF C K-wire	ORIF	Fracture	7	M		General Anaesthesia	Non-Essential	Non-Essential	2	2		Emergency
3077	PB File	MAMC	Hosp-3	Apr-19	Ortho Em	Ortho	2019-04-28		Ankle spanning fixator for Bimalleous open #	ORIF	Fracture	57	M		Regional Anesthesia: Spinal, Epidural and Regional Blocks	Non-Essential	Non-Essential	2	2		Emergency
3078	PB File	MAMC	Hosp-3	Apr-19	Ortho Em	Ortho	2019-04-29		ORIF & Central line insertion	ORIF	Fracture	30	M		General Anaesthesia	Non-Essential	Non-Essential	2	2		Emergency
3079	PB File	MAMC	Hosp-3	Apr-19	Ortho Em	Ortho	2019-04-29		ORIF & Plating for # shaft of Radius	ORIF	Fracture	23	M		Regional Anesthesia: Spinal, Epidural and Regional Blocks	Non-Essential	Non-Essential	2	2		Emergency
3139	PB File	Terna	Hosp-5	Apr-19	Orthopaedics	Ortho	2019-01-04		LEFT RADIUS ULNA IMPLANT REMOVAL	ORIF	Fracture	999	M		Regional Anesthesia: Spinal, Epidural and Regional Blocks	Non-Essential	Non-Essential	4	4		Elective
3140	PB File	Terna	Hosp-5	Apr-19	Orthopaedics	Ortho	2019-04-04		ORIF LEFT RADIUS HEAD PLATTING	ORIF	Fracture	999	M		Sedation	Non-Essential	Non-Essential	1	1		Emergency
3141	PB File	Terna	Hosp-5	Apr-19	Orthopaedics	Ortho	2019-05-04		ORIF OF PROXIMAL TIBIA+ BONE GRAFTING + ORIF OF PATELLA	ORIF	Fracture	999	M		Regional Anesthesia: Spinal, Epidural and Regional Blocks	Non-Essential	Non-Essential	1	1		Emergency
3142	PB File	Terna	Hosp-5	Apr-19	Orthopaedics	Ortho	2019-07-04		ORIF WITH K - WIRE LEFT SUPRA CONDYLAR HUMERUS	ORIF	Fracture	999	M		General Anaesthesia	Non-Essential	Non-Essential	1	1		Emergency
3143	PB File	Terna	Hosp-5	Apr-19	Orthopaedics	Ortho	2019-11-04		ORIF LEFORT SECONDARY FRACTURE	ORIF	Fracture	999	F		General Anaesthesia	Non-Essential	Non-Essential	1	1		Emergency
3144	PB File	Terna	Hosp-5	Apr-19	Orthopaedics	Ortho	2019-11-04		ORIF OF RIGHT FEMUR NECK WITH CC SCREW	ORIF	Fracture	999	M		Regional Anesthesia: Spinal, Epidural and Regional Blocks	Non-Essential	Non-Essential	1	1		Emergency
3145	PB File	Terna	Hosp-5	Apr-19	Orthopaedics	Ortho	2019-12-04		RIGHT PROXIMAL HUMERUS ORIF FIXATION WITH PLATING WITH	ORIF	Fracture	999	M		General Anaesthesia	Non-Essential	Non-Essential	1	1		Emergency
3146	PB File	Terna	Hosp-5	Apr-19	Orthopaedics	Ortho	2019-12-04		ORIF OF RIGHT FEMUR WITH PFN A2	ORIF	Fracture	999	F		Regional Anesthesia: Spinal, Epidural and Regional Blocks	Non-Essential	Non-Essential	1	1		Emergency
3147	PB File	Terna	Hosp-5	Apr-19	Orthopaedics	Ortho	15/04/2019		ORIF WITH PLATTING OF RIGHT VOLAR BARTON FRACTURE	ORIF	Fracture	999	F		Regional Anesthesia: Spinal, Epidural and Regional Blocks	Non-Essential	Non-Essential	1	1		Emergency
3148	PB File	Terna	Hosp-5	Apr-19	Orthopaedics	Ortho	19/04/2019		OPEN REDUCTION INTERNAL FIXATION ON LEFT HIP	ORIF	Fracture	999	M		Regional Anesthesia: Spinal, Epidural and Regional Blocks	Non-Essential	Non-Essential	1	1		Emergency
3149	PB File	Terna	Hosp-5	Apr-19	Orthopaedics	Ortho	20/04/2019		RIGHT ANKLE OPEN REDUCTION INTERNAL FIXATION WITH PLATING	ORIF	Fracture	999	M		Regional Anesthesia: Spinal, Epidural and Regional Blocks	Non-Essential	Non-Essential	1	1		Emergency
3150	PB File	Terna	Hosp-5	Apr-19	Orthopaedics	Ortho	20/04/2019		ORIF WITH PLATING OF LEFT SCAPULA	ORIF	Fracture	999	M		General Anaesthesia	Non-Essential	Non-Essential	2	2		Emergency
3151	PB File	Terna	Hosp-5	Apr-19	Orthopaedics	Ortho	23/04/2019		LEFT PROXIMAL TIBIA IMPLANT REMOVAL	ORIF	Fracture	999	M		Regional Anesthesia: Spinal, Epidural and Regional Blocks	Non-Essential	Non-Essential	4	4		Elective
3152	PB File	Terna	Hosp-5	Apr-19	Orthopaedics	Ortho	25/04/2019		ORIF TENS BAND WIRING OF LEFT PATELLA	ORIF	Fracture	999	M		Regional Anesthesia: Spinal, Epidural and Regional Blocks	Non-Essential	Non-Essential	1	1		Emergency
3153	PB File	Terna	Hosp-5	Apr-19	Orthopaedics	Ortho	25/04/2019		ORIF WITH PLATTING OF RIGHT RADIUS AND ULNAR FRACTURE	ORIF	Fracture	999	M		General Anaesthesia	Non-Essential	Non-Essential	1	1		Emergency
3178	PB File	KEM	Hosp-2	Apr-19	Ortho	Ortho	2019-03-30		$ # for ORIF	ORIF	Fracture	32	M		General Anaesthesia	Non-Essential	Non-Essential	1	1		Emergency
3179	PB File	KEM	Hosp-2	Apr-19	Ortho	Ortho	2019-03-30		Left distal radius $ plating	ORIF	Fracture	60	M		Not available	Non-Essential	Non-Essential	1	1		Emergency
3180	PB File	KEM	Hosp-2	Apr-19	Ortho	Ortho	2019-03-31		Left proximal $	ORIF	Fracture	70	M		Regional Anesthesia: Spinal, Epidural and Regional Blocks	Non-Essential	Non-Essential	1	1		Emergency
3181	PB File	KEM	Hosp-2	Apr-19	Ortho	Ortho	2019-03-31		Exf fixation SSB of tibia	ORIF	Fracture	35	M		General Anaesthesia	Essential	Non-Essential	1	1		Emergency
3182	PB File	KEM	Hosp-2	Apr-19	Ortho	Ortho	2019-03-31		$ platting $	ORIF	Fracture	47	M		General Anaesthesia	Non-Essential	Non-Essential	1	1		Emergency
3183	PB File	KEM	Hosp-2	Apr-19	Ortho	Ortho	2019-04-01		Right tibia fibula non union illizarov fixation	ORIF	Fracture	66	M		General Anaesthesia	Essential	Non-Essential	1	1		Emergency
3184	PB File	KEM	Hosp-2	Apr-19	Ortho	Ortho	2019-04-01		Left femur plating + before grafting	ORIF	Fracture	18	M		Regional Anesthesia: Spinal, Epidural and Regional Blocks	Non-Essential	Non-Essential	1	1		Emergency
3185	PB File	KEM	Hosp-2	Apr-19	Ortho	Ortho	2019-04-02		Left distal end radius	ORIF	Fracture	80	F		General Anaesthesia	Non-Essential	Non-Essential	1	1		Emergency
3186	PB File	KEM	Hosp-2	Apr-19	Ortho	Ortho	2019-04-02		Left distal end radius ulna #	ORIF	Fracture	21	M		General Anaesthesia	Non-Essential	Non-Essential	1	1		Emergency
3187	PB File	KEM	Hosp-2	Apr-19	Ortho	Ortho	2019-04-02		Right proximal tibia # ORIF	ORIF	Fracture	65	F		General Anaesthesia	Non-Essential	Non-Essential	1	1		Emergency
3188	PB File	KEM	Hosp-2	Apr-19	Ortho	Ortho	2019-04-02		Right olecranon # ORIF plating	ORIF	Fracture	59	F		Regional Anesthesia: Spinal, Epidural and Regional Blocks	Non-Essential	Non-Essential	1	1		Emergency
3189	PB File	KEM	Hosp-2	Apr-19	Ortho	Ortho	2019-04-06		Distal radius ulna # k $	ORIF	Fracture	58	F		General Anaesthesia	Non-Essential	Non-Essential	1	1		Emergency
3190	PB File	KEM	Hosp-2	Apr-19	Ortho	Ortho	2019-04-06		Left humerus # external fixator	ORIF	Fracture	23	M		General Anaesthesia	Essential	Non-Essential	1	1		Emergency
3191	PB File	KEM	Hosp-2	Apr-19	Ortho	Ortho	2019-04-06		Right supracondylar # closed reduction sos ORIF	ORIF	Fracture	5	F		General Anaesthesia	Non-Essential	Non-Essential	1	1		Emergency
3192	PB File	KEM	Hosp-2	Apr-19	Ortho	Ortho	2019-04-07		Left Radius Ulna plating	ORIF	Fracture	50	F		General Anaesthesia	Non-Essential	Non-Essential	1	1		Emergency
3193	PB File	KEM	Hosp-2	Apr-19	Ortho	Ortho	2019-04-03		Right supracondylar # closed reduction sos $	ORIF	Fracture	6	F		General Anaesthesia	Non-Essential	Non-Essential	1	1		Emergency
3194	PB File	KEM	Hosp-2	Apr-19	Ortho	Ortho	2019-04-03		$ distal end $$ plating	ORIF	Fracture	42	M		Regional Anesthesia: Spinal, Epidural and Regional Blocks	Non-Essential	Non-Essential	1	1		Emergency
3195	PB File	KEM	Hosp-2	Apr-19	Ortho	Ortho	2019-04-04		Right knee fixator	ORIF	Fracture	43	M		Regional Anesthesia: Spinal, Epidural and Regional Blocks	Essential	Non-Essential	1	1		Emergency
3196	PB File	KEM	Hosp-2	Apr-19	Ortho	Ortho	2019-04-04		Right $ II $ with $	ORIF	Fracture	36	M		Not available	Non-Essential	Non-Essential	1	1		Emergency
3197	PB File	KEM	Hosp-2	Apr-19	Ortho	Ortho	2019-04-04		Right proximal ulna # $	ORIF	Fracture	18	F		Regional Anesthesia: Spinal, Epidural and Regional Blocks	Non-Essential	Non-Essential	1	1		Emergency
3198	PB File	KEM	Hosp-2	Apr-19	Ortho	Ortho	2019-04-05		Right $ shaft tibia # ORIF	ORIF	Fracture	8	M		General Anaesthesia	Non-Essential	Non-Essential	1	1		Emergency
3199	PB File	KEM	Hosp-2	Apr-19	Ortho	Ortho	2019-04-07		Right $$ # ORIF	ORIF	Fracture	46	F		Regional Anesthesia: Spinal, Epidural and Regional Blocks	Non-Essential	Non-Essential	1	1		Emergency
3200	PB File	KEM	Hosp-2	Apr-19	Ortho	Ortho	2019-04-08		Left supracondylar $ K wire	ORIF	Fracture	5	F		General Anaesthesia	Non-Essential	Non-Essential	1	1		Emergency
3201	PB File	KEM	Hosp-2	Apr-19	Ortho	Ortho	2019-04-08		Left distal tibia # with ORIF + 1M nailing	ORIF	Fracture	52	M		Regional Anesthesia: Spinal, Epidural and Regional Blocks	Non-Essential	Non-Essential	1	1		Emergency
3202	PB File	KEM	Hosp-2	Apr-19	Ortho	Ortho	2019-04-08		Right supracondylar # humerus for $	ORIF	Fracture	7	M		General Anaesthesia	Non-Essential	Non-Essential	1	1		Emergency
3203	PB File	KEM	Hosp-2	Apr-19	Ortho	Ortho	2019-04-09		Right TFN $ right $	ORIF	Fracture	87	M		Regional Anesthesia: Spinal, Epidural and Regional Blocks	Non-Essential	Non-Essential	1	1		Emergency
3204	PB File	KEM	Hosp-2	Apr-19	Ortho	Ortho	2019-04-09		Right proximation tibia # with $ with $ grafting	ORIF	Fracture	46	M		Regional Anesthesia: Spinal, Epidural and Regional Blocks	Non-Essential	Non-Essential	1	1		Emergency
3205	PB File	KEM	Hosp-2	Apr-19	Ortho	Ortho	2019-04-09		Right proximation humerus philos	ORIF	Fracture	65	F		General Anaesthesia	Non-Essential	Non-Essential	1	1		Emergency
3206	PB File	KEM	Hosp-2	Apr-19	Ortho	Ortho	2019-04-10		Right $ shaft for ORIF with plating	ORIF	Fracture	16	M		General Anaesthesia	Non-Essential	Non-Essential	1	1		Emergency
3207	PB File	KEM	Hosp-2	Apr-19	Ortho	Ortho	2019-04-10		Right distal radius + K wiring	ORIF	Fracture	13	M		General Anaesthesia	Non-Essential	Non-Essential	1	1		Emergency
3208	PB File	KEM	Hosp-2	Apr-19	Ortho	Ortho	2019-04-18		Left radius ulna # $	ORIF	Fracture	43	M		Not available	Non-Essential	Non-Essential	1	1		Emergency
3209	PB File	KEM	Hosp-2	Apr-19	Ortho	Ortho	2019-04-19		Right humerus # with left $ for ORIF	ORIF	Fracture	40	M		General Anaesthesia	Non-Essential	Non-Essential	1	1		Emergency
3210	PB File	KEM	Hosp-2	Apr-19	Ortho	Ortho	2019-04-19		Left distal ulna	ORIF	Fracture	23	M		Regional Anesthesia: Spinal, Epidural and Regional Blocks	Non-Essential	Non-Essential	1	1		Emergency
3211	PB File	KEM	Hosp-2	Apr-19	Ortho	Ortho	2019-04-19		Left olecranon # for plating	ORIF	Fracture	23	M		Regional Anesthesia: Spinal, Epidural and Regional Blocks	Non-Essential	Non-Essential	1	1		Emergency
3212	PB File	KEM	Hosp-2	Apr-19	Ortho	Ortho	2019-04-19		Left bimalleolar # ORIF K wire $	ORIF	Fracture	35	M		General Anaesthesia	Non-Essential	Non-Essential	1	1		Emergency
3213	PB File	KEM	Hosp-2	Apr-19	Ortho	Ortho	2019-04-20		Left distal radius #	ORIF	Fracture	36	M		Regional Anesthesia: Spinal, Epidural and Regional Blocks	Non-Essential	Non-Essential	1	1		Emergency
3214	PB File	KEM	Hosp-2	Apr-19	Ortho	Ortho	2019-04-20		Right ulna # for plating	ORIF	Fracture	35	M		Regional Anesthesia: Spinal, Epidural and Regional Blocks	Non-Essential	Non-Essential	1	1		Emergency
3215	PB File	KEM	Hosp-2	Apr-19	Ortho	Ortho	2019-04-20		Left radius ulna # nailing + $$	ORIF	Fracture	30	M		General Anaesthesia	Non-Essential	Non-Essential	1	1		Emergency
3216	PB File	KEM	Hosp-2	Apr-19	Ortho	Ortho	2019-04-13		Left femur shaft nail	ORIF	Fracture	10	M		Regional Anesthesia: Spinal, Epidural and Regional Blocks	Non-Essential	Non-Essential	1	1		Emergency
3217	PB File	KEM	Hosp-2	Apr-19	Ortho	Ortho	2019-04-14		Right distal tibia and fibula shaft # repair	ORIF	Fracture	50	M		Regional Anesthesia: Spinal, Epidural and Regional Blocks	Non-Essential	Non-Essential	1	1		Emergency
3218	PB File	KEM	Hosp-2	Apr-19	Ortho	Ortho	2019-04-14		Right distal end radius repair	ORIF	Fracture	40	F		General Anaesthesia	Non-Essential	Non-Essential	1	1		Emergency
3219	PB File	KEM	Hosp-2	Apr-19	Ortho	Ortho	2019-04-15		Left radius + ulna # $ nailing	ORIF	Fracture	14	M		General Anaesthesia	Non-Essential	Non-Essential	1	1		Emergency
3220	PB File	KEM	Hosp-2	Apr-19	Ortho	Ortho	2019-04-15		Right $$	ORIF	Fracture	33	M		Regional Anesthesia: Spinal, Epidural and Regional Blocks	Non-Essential	Non-Essential	1	1		Emergency
3221	PB File	KEM	Hosp-2	Apr-19	Ortho	Ortho	2019-04-23		Left proximal tibia # plating	ORIF	Fracture	41	M		Regional Anesthesia: Spinal, Epidural and Regional Blocks	Non-Essential	Non-Essential	1	1		Emergency
3222	PB File	KEM	Hosp-2	Apr-19	Ortho	Ortho	2019-04-24		Left distal radius ulna # plating	ORIF	Fracture	44	M		General Anaesthesia	Non-Essential	Non-Essential	1	1		Emergency
3223	PB File	KEM	Hosp-2	Apr-19	Ortho	Ortho	2019-04-24		Right $ # ORIF	ORIF	Fracture	70	F		Regional Anesthesia: Spinal, Epidural and Regional Blocks	Non-Essential	Non-Essential	1	1		Emergency
3224	PB File	KEM	Hosp-2	Apr-19	Ortho	Ortho	2019-04-24		Right elbow TB $	ORIF	Fracture	25	F		Not available	Non-Essential	Non-Essential	1	1		Emergency
3225	PB File	KEM	Hosp-2	Apr-19	Ortho	Ortho	2019-04-25		Left knee septic $	ORIF	Fracture	23	F		Regional Anesthesia: Spinal, Epidural and Regional Blocks	Non-Essential	Non-Essential	1	1		Emergency
3226	PB File	KEM	Hosp-2	Apr-19	Ortho	Ortho	2019-04-25		Right $$	ORIF	Fracture	35	M		Regional Anesthesia: Spinal, Epidural and Regional Blocks	Non-Essential	Non-Essential	1	1		Emergency
3227	PB File	KEM	Hosp-2	Apr-19	Ortho	Ortho	2019-04-25		Left distal $+left GT # $	ORIF	Fracture	26	M		Not available	Non-Essential	Non-Essential	1	1		Emergency
3228	PB File	KEM	Hosp-2	Apr-19	Ortho	Ortho	2019-04-27		Left supracondylar k wiring	ORIF	Fracture	3	M		General Anaesthesia	Non-Essential	Non-Essential	1	1		Emergency
3229	PB File	KEM	Hosp-2	Apr-19	Ortho	Ortho	2019-04-22		Distal humerus #	ORIF	Fracture	54	M		General Anaesthesia	Non-Essential	Non-Essential	1	1		Emergency
3230	PB File	KEM	Hosp-2	Apr-19	Ortho	Ortho	2019-04-23		Right $ nails # fixation	ORIF	Fracture	14	M		General Anaesthesia	Non-Essential	Non-Essential	1	1		Emergency
3231	PB File	KEM	Hosp-2	Apr-19	Ortho	Ortho	2019-04-10		Left tibia shaft #	ORIF	Fracture	52	M		Regional Anesthesia: Spinal, Epidural and Regional Blocks	Non-Essential	Non-Essential	1	1		Emergency
3232	PB File	KEM	Hosp-2	Apr-19	Ortho	Ortho	2019-04-11		Left foot $ # $ ORIF	ORIF	Fracture	35	M		General Anaesthesia	Non-Essential	Non-Essential	1	1		Emergency
3233	PB File	KEM	Hosp-2	Apr-19	Ortho	Ortho	2019-04-11		Right parella # for TBW	ORIF	Fracture	85	M		Regional Anesthesia: Spinal, Epidural and Regional Blocks	Non-Essential	Non-Essential	1	1		Emergency
3234	PB File	KEM	Hosp-2	Apr-19	Ortho	Ortho	2019-04-12		Right tibia compound # & external fixation	ORIF	Fracture	44	M		Not available	Essential	Non-Essential	1	1		Emergency
3235	PB File	KEM	Hosp-2	Apr-19	Ortho	Ortho	2019-04-12		# tibia $$	ORIF	Fracture	67	F		General Anaesthesia	Non-Essential	Non-Essential	1	1		Emergency
3236	PB File	KEM	Hosp-2	Apr-19	Ortho	Ortho	2019-04-12		Right IT # for DHS	ORIF	Fracture	50	M		General Anaesthesia	Non-Essential	Non-Essential	1	1		Emergency
3237	PB File	KEM	Hosp-2	Apr-19	Ortho	Ortho	2019-04-25		Right IT # fixation	ORIF	Fracture	60	M		Regional Anesthesia: Spinal, Epidural and Regional Blocks	Non-Essential	Non-Essential	1	1		Emergency
3238	PB File	KEM	Hosp-2	Apr-19	Ortho	Ortho	2019-04-25		Left TCNF	ORIF	Fracture	41	M		Regional Anesthesia: Spinal, Epidural and Regional Blocks	Non-Essential	Non-Essential	1	1		Emergency
3239	PB File	KEM	Hosp-2	Apr-19	Ortho	Ortho	2019-04-26		Left humerus shaft # plating	ORIF	Fracture	60	M		General Anaesthesia	Non-Essential	Non-Essential	1	1		Emergency
3240	PB File	KEM	Hosp-2	Apr-19	Ortho	Ortho	2019-04-26		Left DER $ plating	ORIF	Fracture	45	M		Regional Anesthesia: Spinal, Epidural and Regional Blocks	Non-Essential	Non-Essential	1	1		Emergency
3241	PB File	KEM	Hosp-2	Apr-19	Ortho	Ortho	2019-04-27		Left supracondylar humerus #	ORIF	Fracture	10	M		General Anaesthesia	Non-Essential	Non-Essential	1	1		Emergency
3242	PB File	KEM	Hosp-2	Apr-19	Ortho	Ortho	2019-04-27		Right ulma # plating	ORIF	Fracture	50	M		Regional Anesthesia: Spinal, Epidural and Regional Blocks	Non-Essential	Non-Essential	1	1		Emergency
3243	PB File	KEM	Hosp-2	Apr-19	Ortho	Ortho	2019-04-26		Left supracondylar # closed reduction K wire	ORIF	Fracture	12	M		General Anaesthesia	Non-Essential	Non-Essential	1	1		Emergency
3244	PB File	KEM	Hosp-2	Apr-19	Ortho	Ortho	2019-04-28		Right pott # ORIF	ORIF	Fracture	40	F		Not available	Non-Essential	Non-Essential	1	1		Emergency
3245	PB File	KEM	Hosp-2	Apr-19	Ortho	Ortho	2019-04-28		$ + corticotomy	ORIF	Fracture	3	M		General Anaesthesia	Non-Essential	Non-Essential	1	1		Emergency
3246	PB File	KEM	Hosp-2	Apr-19	Ortho	Ortho	2019-04-28		Left scaphoid #	ORIF	Fracture	26	M		General Anaesthesia	Non-Essential	Non-Essential	1	1		Emergency
3247	PB File	KEM	Hosp-2	Apr-19	Ortho	Ortho	2019-04-29		Left DER #	ORIF	Fracture	69	M		General Anaesthesia	Non-Essential	Non-Essential	1	1		Emergency
3248	PB File	KEM	Hosp-2	Apr-19	Ortho	Ortho	2019-04-29		Right pott # ORIF $ with TBW	ORIF	Fracture	38	M		Regional Anesthesia: Spinal, Epidural and Regional Blocks	Non-Essential	Non-Essential	1	1		Emergency
3249	PB File	KEM	Hosp-2	Apr-19	Ortho	Ortho	2019-04-29		Right $ ilizarov $ fixation	ORIF	Fracture	54	M		General Anaesthesia	Non-Essential	Non-Essential	1	1		Emergency
3250	PB File	KEM	Hosp-2	Apr-19	Ortho	Ortho	2019-04-29		Left pott #	ORIF	Fracture	50	F		Regional Anesthesia: Spinal, Epidural and Regional Blocks	Non-Essential	Non-Essential	1	1		Emergency
3251	PB File	KEM	Hosp-2	Apr-19	Ortho	Ortho	2019-04-30		Left supracondylar $	ORIF	Fracture	8	M		General Anaesthesia	Non-Essential	Non-Essential	1	1		Emergency
3252	PB File	KEM	Hosp-2	Apr-19	Ortho	Ortho	2019-04-30		Left IT # for PEN	ORIF	Fracture	61	F		General Anaesthesia	Non-Essential	Non-Essential	1	1		Emergency
3253	PB File	KEM	Hosp-2	Apr-19	Ortho	Ortho	2019-05-01		Left radius cross k wiring	ORIF	Fracture	10	F		General Anaesthesia	Non-Essential	Non-Essential	1	1		Emergency
3254	PB File	KEM	Hosp-2	Apr-19	Ortho	Ortho	2019-05-01		Right foor # for external fixation	ORIF	Fracture	51	M		General Anaesthesia	Essential	Non-Essential	1	1		Emergency
3255	PB File	KEM	Hosp-2	Apr-19	Ortho	Ortho	2019-03-30		C6C9 # $$ with bone grafting	ORIF	Fracture	44	M		General Anaesthesia	Non-Essential	Non-Essential	1	1		Emergency
3256	PB File	KEM	Hosp-2	Apr-19	Ortho	Ortho	2019-03-30		# right pott ORIF	ORIF	Fracture	37	M		Regional Anesthesia: Spinal, Epidural and Regional Blocks	Non-Essential	Non-Essential	1	1		Emergency
3257	PB File	KEM	Hosp-2	Apr-19	Ortho	Ortho	2019-04-01		Left TCNF # for bipolar	ORIF	Fracture	50	F		Regional Anesthesia: Spinal, Epidural and Regional Blocks	Non-Essential	Non-Essential	1	1		Emergency
3258	PB File	KEM	Hosp-2	Apr-19	Ortho	Ortho	2019-04-01		Right ITNF # for bipolar	ORIF	Fracture	54	F		Regional Anesthesia: Spinal, Epidural and Regional Blocks	Non-Essential	Non-Essential	1	1		Emergency
3259	PB File	KEM	Hosp-2	Apr-19	Ortho	Ortho	2019-04-01		Left TCNF # for bipolar	ORIF	Fracture	75	F		Regional Anesthesia: Spinal, Epidural and Regional Blocks	Non-Essential	Non-Essential	1	1		Emergency
3260	PB File	KEM	Hosp-2	Apr-19	Ortho	Ortho	2019-04-03		Left proximal ulna # plating with BG	ORIF	Fracture	30	M		Regional Anesthesia: Spinal, Epidural and Regional Blocks	Non-Essential	Non-Essential	1	1		Emergency
3261	PB File	KEM	Hosp-2	Apr-19	Ortho	Ortho	2019-04-04		Right Transcerbical femur neck # bipolar hemiartho plating	ORIF	Fracture	55	F		Regional Anesthesia: Spinal, Epidural and Regional Blocks	Non-Essential	Non-Essential	1	1		Emergency
3262	PB File	KEM	Hosp-2	Apr-19	Ortho	Ortho	2019-04-02		Right ITNF # for ORIF	ORIF	Fracture	68	F		General Anaesthesia	Non-Essential	Non-Essential	1	1		Emergency
3263	PB File	KEM	Hosp-2	Apr-19	Ortho	Ortho	2019-04-02		Right knee $$	ORIF	Fracture	19	M		Regional Anesthesia: Spinal, Epidural and Regional Blocks	Non-Essential	Non-Essential	1	1		Emergency
3264	PB File	KEM	Hosp-2	Apr-19	Ortho	Ortho	2019-04-03		Right TCNF # for THR	ORIF	Fracture	54	F		General Anaesthesia	Non-Essential	Non-Essential	1	1		Emergency
3265	PB File	KEM	Hosp-2	Apr-19	Ortho	Ortho	2019-04-03		Right shaft humerus philos plating	ORIF	Fracture	24	M		General Anaesthesia	Non-Essential	Non-Essential	1	1		Emergency
3266	PB File	KEM	Hosp-2	Apr-19	Ortho	Ortho	2019-04-09		Left ITNF # for ORIF	ORIF	Fracture	68	F		Regional Anesthesia: Spinal, Epidural and Regional Blocks	Non-Essential	Non-Essential	1	1		Emergency
3267	PB File	KEM	Hosp-2	Apr-19	Ortho	Ortho	2019-04-09		$ distal femur shaft # for ORIF interlock nailing	ORIF	Fracture	18	M		Regional Anesthesia: Spinal, Epidural and Regional Blocks	Non-Essential	Non-Essential	1	1		Emergency
3268	PB File	KEM	Hosp-2	Apr-19	Ortho	Ortho	2019-04-09		Right proximal humerus # for ORIF	ORIF	Fracture	58	M		General Anaesthesia	Non-Essential	Non-Essential	1	1		Emergency
3269	PB File	KEM	Hosp-2	Apr-19	Ortho	Ortho	2019-04-10		Right $$$	ORIF	Fracture	64	M		Regional Anesthesia: Spinal, Epidural and Regional Blocks	Non-Essential	Non-Essential	1	1		Emergency
3270	PB File	KEM	Hosp-2	Apr-19	Ortho	Ortho	2019-04-10		Right medial patellar femoral $$$	ORIF	Fracture	23	F		Regional Anesthesia: Spinal, Epidural and Regional Blocks	Non-Essential	Non-Essential	1	1		Emergency
3271	PB File	KEM	Hosp-2	Apr-19	Ortho	Ortho	2019-04-10		Left knee multilig injury orthoscopy repait	ORIF	Fracture	29	M		Regional Anesthesia: Spinal, Epidural and Regional Blocks	Non-Essential	Non-Essential	1	1		Emergency
3272	PB File	KEM	Hosp-2	Apr-19	Ortho	Ortho	2019-04-11		Right radius # AMR k wire	ORIF	Fracture	67	M		Regional Anesthesia: Spinal, Epidural and Regional Blocks	Non-Essential	Non-Essential	1	1		Emergency
3273	PB File	KEM	Hosp-2	Apr-19	Ortho	Ortho	2019-04-05		Left tibia shaft # for nailing	ORIF	Fracture	59	M		Regional Anesthesia: Spinal, Epidural and Regional Blocks	Non-Essential	Non-Essential	1	1		Emergency
3274	PB File	KEM	Hosp-2	Apr-19	Ortho	Ortho	2019-04-08		Left TCNF # for $	ORIF	Fracture	44	M		General Anaesthesia	Non-Essential	Non-Essential	1	1		Emergency
3275	PB File	KEM	Hosp-2	Apr-19	Ortho	Ortho	2019-04-13		Left IT # for $ DHS	ORIF	Fracture	80	F		Not available	Non-Essential	Non-Essential	1	1		Emergency
3276	PB File	KEM	Hosp-2	Apr-19	Ortho	Ortho	2019-04-15		Left ITNF # $ DHS	ORIF	Fracture	70	F		Regional Anesthesia: Spinal, Epidural and Regional Blocks	Non-Essential	Non-Essential	1	1		Emergency
3277	PB File	KEM	Hosp-2	Apr-19	Ortho	Ortho	2019-04-15		Right ITNF for PFN	ORIF	Fracture	45	M		Regional Anesthesia: Spinal, Epidural and Regional Blocks	Non-Essential	Non-Essential	1	1		Emergency
3278	PB File	KEM	Hosp-2	Apr-19	Ortho	Ortho	2019-04-16		Right TCNF # for $ TMR	ORIF	Fracture	85	M		Regional Anesthesia: Spinal, Epidural and Regional Blocks	Non-Essential	Non-Essential	1	1		Emergency
3279	PB File	KEM	Hosp-2	Apr-19	Ortho	Ortho	2019-04-16		Right foot $$ for post op. $	ORIF	Fracture	5	M		General Anaesthesia	Non-Essential	Non-Essential	1	1		Emergency
3280	PB File	KEM	Hosp-2	Apr-19	Ortho	Ortho	2019-04-16		Right proximal plating	ORIF	Fracture	62	M		Regional Anesthesia: Spinal, Epidural and Regional Blocks	Non-Essential	Non-Essential	1	1		Emergency
3281	PB File	KEM	Hosp-2	Apr-19	Ortho	Ortho	2019-04-16		Left distal tibia for plating	ORIF	Fracture	84	F		Regional Anesthesia: Spinal, Epidural and Regional Blocks	Non-Essential	Non-Essential	1	1		Emergency
3282	PB File	KEM	Hosp-2	Apr-19	Ortho	Ortho	2019-04-18		Left # potts ORIF	ORIF	Fracture	29	M		Regional Anesthesia: Spinal, Epidural and Regional Blocks	Non-Essential	Non-Essential	1	1		Emergency
3283	PB File	KEM	Hosp-2	Apr-19	Ortho	Ortho	2019-04-19		Operation # left humerus	ORIF	Fracture	14	F		General Anaesthesia	Non-Essential	Non-Essential	1	1		Emergency
3284	PB File	KEM	Hosp-2	Apr-19	Ortho	Ortho	2019-04-19		left tibia # implant removal	ORIF	Fracture	14	F		General Anaesthesia	Non-Essential	Non-Essential	1	1		Emergency
3285	PB File	KEM	Hosp-2	Apr-19	Ortho	Ortho	2019-04-19		$$ radius shaft plating	ORIF	Fracture	22	M		General Anaesthesia	Non-Essential	Non-Essential	1	1		Emergency
3286	PB File	KEM	Hosp-2	Apr-19	Ortho	Ortho	2019-04-20		C4,5 $ for $ plating	ORIF	Fracture	49	M		General Anaesthesia	Non-Essential	Non-Essential	1	1		Emergency
3287	PB File	KEM	Hosp-2	Apr-19	Ortho	Ortho	2019-04-20		Right distal femur # for plating	ORIF	Fracture	42	M		Regional Anesthesia: Spinal, Epidural and Regional Blocks	Non-Essential	Non-Essential	1	1		Emergency
3288	PB File	KEM	Hosp-2	Apr-19	Ortho	Ortho	2019-04-18		Left humerus$ shaft # tens nailing	ORIF	Fracture	8	M		General Anaesthesia	Non-Essential	Non-Essential	1	1		Emergency
3289	PB File	KEM	Hosp-2	Apr-19	Ortho	Ortho	2019-04-18		Right proximal tibia #	ORIF	Fracture	50	F		Regional Anesthesia: Spinal, Epidural and Regional Blocks	Non-Essential	Non-Essential	1	1		Emergency
3290	PB File	KEM	Hosp-2	Apr-19	Ortho	Ortho	2019-04-18		Left TCNF # for AMR	ORIF	Fracture	60	F		Regional Anesthesia: Spinal, Epidural and Regional Blocks	Non-Essential	Non-Essential	1	1		Emergency
3291	PB File	KEM	Hosp-2	Apr-19	Ortho	Ortho	2019-04-11		Left elbow $$	ORIF	Fracture	42	M		General Anaesthesia	Non-Essential	Non-Essential	1	1		Emergency
3292	PB File	KEM	Hosp-2	Apr-19	Ortho	Ortho	2019-04-12		Bipolar left ITNF #	ORIF	Fracture	75	F		Regional Anesthesia: Spinal, Epidural and Regional Blocks	Non-Essential	Non-Essential	1	1		Emergency
3293	PB File	KEM	Hosp-2	Apr-19	Ortho	Ortho	2019-04-12		$ Ankle # for ORIF	ORIF	Fracture	54	M		Regional Anesthesia: Spinal, Epidural and Regional Blocks	Non-Essential	Non-Essential	1	1		Emergency
3294	PB File	KEM	Hosp-2	Apr-19	Ortho	Ortho	2019-04-13		# IT ORIF with 13-DHS	ORIF	Fracture	94	F		Regional Anesthesia: Spinal, Epidural and Regional Blocks	Non-Essential	Non-Essential	1	1		Emergency
3295	PB File	KEM	Hosp-2	Apr-19	Ortho	Ortho	2019-04-25		Right $ # for ORIF	ORIF	Fracture	31	M		Regional Anesthesia: Spinal, Epidural and Regional Blocks	Non-Essential	Non-Essential	1	1		Emergency
3296	PB File	KEM	Hosp-2	Apr-19	Ortho	Ortho	2019-04-26		Right IT # $	ORIF	Fracture	80	F		Regional Anesthesia: Spinal, Epidural and Regional Blocks	Non-Essential	Non-Essential	1	1		Emergency
3297	PB File	KEM	Hosp-2	Apr-19	Ortho	Ortho	2019-04-26		Right supracondylar humerus	ORIF	Fracture	999	F		General Anaesthesia	Non-Essential	Non-Essential	1	1		Emergency
3298	PB File	KEM	Hosp-2	Apr-19	Ortho	Ortho	2019-04-26		Right $ # for ORIF	ORIF	Fracture	50	M		General Anaesthesia	Non-Essential	Non-Essential	1	1		Emergency
3299	PB File	KEM	Hosp-2	Apr-19	Ortho	Ortho	2019-04-23		Right TCNF # for bipolar	ORIF	Fracture	89	F		Regional Anesthesia: Spinal, Epidural and Regional Blocks	Non-Essential	Non-Essential	1	1		Emergency
3300	PB File	KEM	Hosp-2	Apr-19	Ortho	Ortho	2019-04-23		Left distal radius plating	ORIF	Fracture	31	M		Regional Anesthesia: Spinal, Epidural and Regional Blocks	Non-Essential	Non-Essential	1	1		Emergency
3301	PB File	KEM	Hosp-2	Apr-19	Ortho	Ortho	2019-04-23		left femur shaft # for plating	ORIF	Fracture	30	M		Regional Anesthesia: Spinal, Epidural and Regional Blocks	Non-Essential	Non-Essential	1	1		Emergency
3302	PB File	KEM	Hosp-2	Apr-19	Ortho	Ortho	2019-04-25		Left disclocation bipolar $	ORIF	Fracture	62	F		Regional Anesthesia: Spinal, Epidural and Regional Blocks	Non-Essential	Non-Essential	1	1		Emergency
3303	PB File	KEM	Hosp-2	Apr-19	Ortho	Ortho	2019-04-25		Left IT #	ORIF	Fracture	80	F		Regional Anesthesia: Spinal, Epidural and Regional Blocks	Non-Essential	Non-Essential	1	1		Emergency
3304	PB File	KEM	Hosp-2	Apr-19	Ortho	Ortho	2019-04-25		Right IT # DHS PFN	ORIF	Fracture	30	M		Regional Anesthesia: Spinal, Epidural and Regional Blocks	Non-Essential	Non-Essential	1	1		Emergency
3305	PB File	KEM	Hosp-2	Apr-19	Ortho	Ortho	2019-04-20		Right ThR for $ hip	ORIF	Fracture	33	M		Regional Anesthesia: Spinal, Epidural and Regional Blocks	Non-Essential	Non-Essential	1	1		Emergency
3306	PB File	KEM	Hosp-2	Apr-19	Ortho	Ortho	2019-04-22		Left radius ilna # ORIF 3.5mm $	ORIF	Fracture	43	F		Regional Anesthesia: Spinal, Epidural and Regional Blocks	Non-Essential	Non-Essential	1	1		Emergency
3307	PB File	KEM	Hosp-2	Apr-19	Ortho	Ortho	2019-04-22		Left tibia $$$	ORIF	Fracture	10	M		General Anaesthesia	Non-Essential	Non-Essential	1	1		Emergency
3308	PB File	KEM	Hosp-2	Apr-19	Ortho	Ortho	2019-04-27		Left TCNF # for bipolar	ORIF	Fracture	60	F		Regional Anesthesia: Spinal, Epidural and Regional Blocks	Non-Essential	Non-Essential	1	1		Emergency
3309	PB File	KEM	Hosp-2	Apr-19	Ortho	Ortho	2019-04-27		BIC Ulna $ for ORIF	ORIF	Fracture	27	F		General Anaesthesia	Non-Essential	Non-Essential	1	1		Emergency
3310	PB File	KEM	Hosp-2	Apr-19	Ortho	Ortho	2019-04-27		Right IT # NF for fixation	ORIF	Fracture	75	M		Regional Anesthesia: Spinal, Epidural and Regional Blocks	Non-Essential	Non-Essential	1	1		Emergency
3311	PB File	KEM	Hosp-2	Apr-19	Ortho	Ortho	2019-04-27		Right infected femur $	ORIF	Fracture	28	M		Regional Anesthesia: Spinal, Epidural and Regional Blocks	Non-Essential	Non-Essential	1	1		Emergency
3312	PB File	KEM	Hosp-2	Apr-19	Ortho	Ortho	2019-04-29		Right ITNF # for bipolar	ORIF	Fracture	60	F		Regional Anesthesia: Spinal, Epidural and Regional Blocks	Non-Essential	Non-Essential	1	1		Emergency
3313	PB File	KEM	Hosp-2	Apr-19	Ortho	Ortho	2019-04-30		IT # for ORIF DHS	ORIF	Fracture	72	M		Regional Anesthesia: Spinal, Epidural and Regional Blocks	Non-Essential	Non-Essential	1	1		Emergency
3314	PB File	BARC	Hosp-1	Apr-19	Ortho	Ortho	2019-01-04		Fracture reduction open	ORIF	Fracture	56	M		Regional Anesthesia: Spinal, Epidural and Regional Blocks	Non-Essential	Non-Essential	1	1		Emergency
3315	PB File	BARC	Hosp-1	Apr-19	Ortho	Ortho	2019-02-04		Fracture reduction open	ORIF	Fracture	40	M		General Anaesthesia	Non-Essential	Non-Essential	1	1		Elective
3316	PB File	BARC	Hosp-1	Apr-19	Ortho	Ortho	2019-02-04		Fracture reduction open	ORIF	Fracture	48	F		General Anaesthesia	Non-Essential	Non-Essential	1	1		emergency
3317	PB File	BARC	Hosp-1	Apr-19	Ortho	Ortho	2019-04-04		Fracture reduction open	ORIF	Fracture	80	F		Regional Anesthesia: Spinal, Epidural and Regional Blocks	Non-Essential	Non-Essential	1	1		Elective
3318	PB File	BARC	Hosp-1	Apr-19	Ortho	Ortho	2019-04-04		Fracture reduction open	ORIF	Fracture	48	F		General Anaesthesia	Non-Essential	Non-Essential	1	1		emergency
3319	PB File	BARC	Hosp-1	Apr-19	Ortho	Ortho	2019-06-04		Fracture reduction open	ORIF	Fracture	73	M		General Anaesthesia	Non-Essential	Non-Essential	1	1		emergency
3320	PB File	BARC	Hosp-1	Apr-19	Ortho	Ortho	2019-08-04		Fracture reduction open	ORIF	Fracture	47	F		Regional Anesthesia: Spinal, Epidural and Regional Blocks	Non-Essential	Non-Essential	1	1		emergency
3321	PB File	BARC	Hosp-1	Apr-19	Ortho	Ortho	2019-11-04		Fracture reduction open	ORIF	Fracture	10	F		Regional Anesthesia: Spinal, Epidural and Regional Blocks	Non-Essential	Non-Essential	1	1		Elective
3322	PB File	BARC	Hosp-1	Apr-19	Ortho	Ortho	13-04-2019		Fracture reduction open	ORIF	Fracture	63	M		General Anaesthesia	Non-Essential	Non-Essential	1	1		emergency
3323	PB File	BARC	Hosp-1	Apr-19	Ortho	Ortho	15-04-2019		Fracture reduction open	ORIF	Fracture	63	M		Regional Anesthesia: Spinal, Epidural and Regional Blocks	Non-Essential	Non-Essential	1	1		Elective
3324	PB File	BARC	Hosp-1	Apr-19	Ortho	Ortho	22-04-2019		Fracture reduction open	ORIF	Fracture	68	M		General Anaesthesia	Non-Essential	Non-Essential	1	1		emergency
3325	PB File	BARC	Hosp-1	Apr-19	Ortho	Ortho	23-04-2019		Fracture reduction open	ORIF	Fracture	67	M		General Anaesthesia	Non-Essential	Non-Essential	1	1		emergency
3326	PB File	BARC	Hosp-1	Apr-19	Ortho	Ortho	23-04-2019		Fracture reduction open	ORIF	Fracture	37	M		General Anaesthesia	Non-Essential	Non-Essential	1	1		Elective
3327	PB File	BARC	Hosp-1	Apr-19	Ortho	Ortho	25-04-2019		Fracture reduction open	ORIF	Fracture	23	M		General Anaesthesia	Non-Essential	Non-Essential	1	1		emergency
3328	PB File	BARC	Hosp-1	Apr-19	Ortho	Ortho	25-04-2019		Fracture reduction open	ORIF	Fracture	72	F		Regional Anesthesia: Spinal, Epidural and Regional Blocks	Non-Essential	Non-Essential	1	1		emergency
3329	PB File	BARC	Hosp-1	Apr-19	Ortho	Ortho	27-04-2019		Fracture reduction open	ORIF	Fracture	17	F		Regional Anesthesia: Spinal, Epidural and Regional Blocks	Non-Essential	Non-Essential	1	1		Elective
3346	PB File	Manipal	Hosp-4	Apr-19	Orthopaedics	Ortho	2019-05-04		ORIF left humerus +bone grafting	ORIF	Fracture	72	F		General Anaesthesia	Non-Essential	Non-Essential	1	1		Emergency
3347	PB File	Manipal	Hosp-4	Apr-19	Orthopaedics	Ortho	2019-09-04		Left wrist ORIF	ORIF	Fracture	72	F		General Anaesthesia	Non-Essential	Non-Essential	1	1		Emergency
3348	PB File	Manipal	Hosp-4	Apr-19	Orthopaedics	Ortho	13/4/2019		Right Wrist ORIF	ORIF	Fracture	40	M		General Anaesthesia	Non-Essential	Non-Essential	1	1		Emergency
3349	PB File	Manipal	Hosp-4	Apr-19	Orthopaedics	Ortho	13/4/2019		ORIF	ORIF	Fracture	20	F		General Anaesthesia	Non-Essential	Non-Essential	1	1		Emergency
3385	PB File	MAMC	Hosp-3	Apr-19	Orthopedics	Ortho	17/4/2019		ILIZARO	Others | Essential		44	M		Regional Anesthesia: Spinal, Epidural and Regional Blocks	Essential	Essential	2	2		Elective
3394	PB File	KEM	Hosp-2	Apr-19	General Surgery	GenSx	2019-04-20		Stab injury repair	Others | Essential		38	M		Local anesthesia not supplemented by sedation or GA	Essential	Essential	1	1		Emergency
3395	PB File	KEM	Hosp-2	Apr-19	OBGY	ObGy	2019-04-15		Purperal Tubal Ligation	Others | Essential		26	F		Regional Anesthesia: Spinal, Epidural and Regional Blocks	Essential	Essential	1	1		Elective
3396	PB File	KEM	Hosp-2	Apr-19	OBGY	ObGy	2019-04-25		Purrpurcal Tubal Ligation	Others | Essential		30	F		Regional Anesthesia: Spinal, Epidural and Regional Blocks	Essential	Essential	1	1		Elective
3397	PB File	KEM	Hosp-2	Apr-19	OBGY	ObGy	2019-04-26		Purrpurcal Tubal Ligation	Others | Essential		23	F		Regional Anesthesia: Spinal, Epidural and Regional Blocks	Essential	Essential	1	1		Elective
3398	PB File	KEM	Hosp-2	Apr-19	OBGY	ObGy	2019-04-01		FT Outlet forceps delivery	Others | Essential		26	F		Not available	Essential	Essential	1	1		Emergency
3399	PB File	KEM	Hosp-2	Apr-19	OBGY	ObGy	2019-04-02		Vaccuum xxxxxx FT outlet forcep delivery	Others | Essential		25	F		Not available	Essential	Essential	1	1		emergency
3400	PB File	KEM	Hosp-2	Apr-19	OBGY	ObGy	2019-04-02		Purperal Tubal Ligation	Others | Essential		28	F		Regional Anesthesia: Spinal, Epidural and Regional Blocks	Essential	Essential	1	1		emergency
3401	PB File	KEM	Hosp-2	Apr-19	OBGY	ObGy	2019-04-05		Full Term normal delivery	Others | Essential		30	F		Not available	Essential	Essential	1	1		emergency
3402	PB File	KEM	Hosp-2	Apr-19	OBGY	ObGy	2019-04-18		Full Term outlet forcep delivery with episiotomy suturing	Others | Essential		27	F		Regional Anesthesia: Spinal, Epidural and Regional Blocks	Essential	Essential	1	1		emergency
3408	PB File	MAMC	Hosp-3	Apr-19	Gen.Surgery	GenSx	2019-01-04		Lymph node excision (Cervical)	Others | Non Essential		60	F		Local anesthesia not supplemented by sedation or GA	Non-Essential	Non-Essential	Could Not Be Assigned	Could Not Be Assigned	1	Elective
3409	PB File	MAMC	Hosp-3	Apr-19	Gen.Surgery	GenSx	2019-01-04		RFA (Varicose veins)	Others | Non Essential		45	M		Not available	Non-Essential	Non-Essential	Could Not Be Assigned	Could Not Be Assigned	1	Elective
3410	PB File	MAMC	Hosp-3	Apr-19	Gen.Surgery	GenSx	2019-01-04		Pyelolithotomy for Renal Calculus	Others | Non Essential		55	F		General Anaesthesia	Non-Essential	Non-Essential	4	4	1	Elective
3411	PB File	MAMC	Hosp-3	Apr-19	Gen.Surgery	GenSx	2019-02-04		Excision of Sebaceous Cyst	Others | Non Essential		52	F		Local anesthesia not supplemented by sedation or GA	Non-Essential	Non-Essential	Could Not Be Assigned	Could Not Be Assigned		Elective
3412	PB File	MAMC	Hosp-3	Apr-19	Gen.Surgery	GenSx	2019-02-04		Phimosis ( Cirumcision)	Others | Non Essential		14	M		Local anesthesia not supplemented by sedation or GA	Non-Essential	Non-Essential	4	4		Elective
3413	PB File	MAMC	Hosp-3	Apr-19	Gen.Surgery	GenSx	2019-02-04		Excisional Biopsy (LN)	Others | Non Essential		30	F		Local anesthesia not supplemented by sedation or GA	Non-Essential	Non-Essential	4	4		Elective
3414	PB File	MAMC	Hosp-3	Apr-19	Gen.Surgery	GenSx	2019-02-04		Examination under anesthesia- Complex fistula	Others | Non Essential		28	M		Local anesthesia not supplemented by sedation or GA	Non-Essential	Non-Essential	4	4		Elective
3415	PB File	MAMC	Hosp-3	Apr-19	Gen.Surgery	GenSx	2019-02-04		Fistulotomy & seton placement	Others | Non Essential		29	F		Local anesthesia not supplemented by sedation or GA	Non-Essential	Non-Essential	4	4		Elective
3416	PB File	MAMC	Hosp-3	Apr-19	Gen.Surgery	GenSx	2019-02-04		Fistulotomy & seton placement	Others | Non Essential		28	F		Local anesthesia not supplemented by sedation or GA	Non-Essential	Non-Essential	4	4		Elective
3417	PB File	MAMC	Hosp-3	Apr-19	Gen.Surgery	GenSx	2019-03-04		Pyelolithotomy	Others | Non Essential		25	M		General Anaesthesia	Non-Essential	Non-Essential	4	4		Elective
3418	PB File	MAMC	Hosp-3	Apr-19	Gen.Surgery	GenSx	2019-03-04		Excision (Fibroadenoma)	Others | Non Essential		23	F		General Anaesthesia	Non-Essential	Non-Essential	4	4		Elective
3419	PB File	MAMC	Hosp-3	Apr-19	Gen.Surgery	GenSx	2019-03-04		Chemoport insertion (breast)	Others | Non Essential		35	F		Local anesthesia not supplemented by sedation or GA	Non-Essential	Non-Essential	4	4		Elective
3420	PB File	MAMC	Hosp-3	Apr-19	Gen.Surgery	GenSx	2019-03-04		Excision (Epidermal cyst)	Others | Non Essential		86	M		Local anesthesia not supplemented by sedation or GA	Non-Essential	Non-Essential	4	4		Elective
3421	PB File	MAMC	Hosp-3	Apr-19	Gen.Surgery	GenSx	2019-03-04		L.N.Biopsy	Others | Non Essential		24	M		Local anesthesia not supplemented by sedation or GA	Non-Essential	Non-Essential	4	4		Elective
3422	PB File	MAMC	Hosp-3	Apr-19	Gen.Surgery	GenSx	2019-04-04		R Orchiopexy for Undescended Testis	Others | Non Essential		13	M		General Anaesthesia	Non-Essential	Non-Essential	4	4		Elective
3423	PB File	MAMC	Hosp-3	Apr-19	Gen.Surgery	GenSx	2019-04-04		Wart Removal	Others | Non Essential		20	F		Local anesthesia not supplemented by sedation or GA	Non-Essential	Non-Essential	4	4	NA	Elective
3424	PB File	MAMC	Hosp-3	Apr-19	Gen.Surgery	GenSx	2019-04-04		Sinus Excision	Others | Non Essential		21	M		Local anesthesia not supplemented by sedation or GA	Non-Essential	Non-Essential	4	4		Elective
3425	PB File	MAMC	Hosp-3	Apr-19	Gen.Surgery	GenSx	2019-05-04		Radical Nehphrectomy	Others | Non Essential		52	M		General Anaesthesia	Non-Essential	Non-Essential	2	2		Elective
3426	PB File	MAMC	Hosp-3	Apr-19	Gen.Surgery	GenSx	2019-05-04		Radical Nehphrectomy	Others | Non Essential		67	M		General Anaesthesia	Non-Essential	Non-Essential	2	2		Elective
3427	PB File	MAMC	Hosp-3	Apr-19	Gen.Surgery	GenSx	2019-05-04		Excision (Sebaceous cyst back )	Others | Non Essential		24	M		Local anesthesia not supplemented by sedation or GA	Non-Essential	Non-Essential	4	4		Elective
3428	PB File	MAMC	Hosp-3	Apr-19	Gen.Surgery	GenSx	2019-05-04		Excision (Fibroadenoma) Breast	Others | Non Essential		15	F		Local anesthesia not supplemented by sedation or GA	Non-Essential	Non-Essential	4	4		Elective
3429	PB File	MAMC	Hosp-3	Apr-19	Gen.Surgery	GenSx	2019-05-04		Excision (lipoma)	Others | Non Essential		48	F		Local anesthesia not supplemented by sedation or GA	Non-Essential	Non-Essential	4	4		Elective
3430	PB File	MAMC	Hosp-3	Apr-19	Gen.Surgery	GenSx	2019-05-04		Meatoplasty	Others | Non Essential		40	M		Local anesthesia not supplemented by sedation or GA	Non-Essential	Non-Essential	4	4		Elective
3431	PB File	MAMC	Hosp-3	Apr-19	Gen.Surgery	GenSx	2019-05-04		NSV	Others | Non Essential		42	M		General Anaesthesia	Non-Essential	Non-Essential	4	4		Elective
3432	PB File	MAMC	Hosp-3	Apr-19	Gen.Surgery	GenSx	2019-05-04		Fistulectomy	Others | Non Essential		40	M		Regional Anesthesia: Spinal, Epidural and Regional Blocks	Non-Essential	Non-Essential	4	4		Elective
3433	PB File	MAMC	Hosp-3	Apr-19	Gen.Surgery	GenSx	2019-06-04		Vaso-Epidydimal Anastomosis for infertility	Others | Non Essential		40	M		Local anesthesia not supplemented by sedation or GA	Non-Essential	Non-Essential	4	4		Elective
3434	PB File	MAMC	Hosp-3	Apr-19	Gen.Surgery	GenSx	2019-06-04		Excision (Fibroadenoma) Breast	Others | Non Essential		22	F		General Anaesthesia	Non-Essential	Non-Essential	4	4		Elective
3435	PB File	MAMC	Hosp-3	Apr-19	Gen.Surgery	GenSx	2019-06-04		Excision (pyogenic granuloma)	Others | Non Essential		38	F		Local anesthesia not supplemented by sedation or GA	Non-Essential	Non-Essential	4	4		Elective
3436	PB File	MAMC	Hosp-3	Apr-19	Gen.Surgery	GenSx	2019-06-04		Excision (Sebaceous cyst )	Others | Non Essential		28	M		Local anesthesia not supplemented by sedation or GA	Non-Essential	Non-Essential	4	4		Elective
3437	PB File	MAMC	Hosp-3	Apr-19	Gen.Surgery	GenSx	2019-06-04		Excision (Sebaceous cyst )	Others | Non Essential		22	M		Local anesthesia not supplemented by sedation or GA	Non-Essential	Non-Essential	4	4		Elective
3438	PB File	MAMC	Hosp-3	Apr-19	Gen.Surgery	GenSx	2019-08-04		Excision (Fibroadenoma)	Others | Non Essential		18	F		Local anesthesia not supplemented by sedation or GA	Non-Essential	Non-Essential	4	4		Elective
3439	PB File	MAMC	Hosp-3	Apr-19	Gen.Surgery	GenSx	2019-08-04		Lap Sleeve Gastrectomy	Others | Non Essential		62	M		Not available	Non-Essential	Non-Essential	4	4		Elective
3440	PB File	MAMC	Hosp-3	Apr-19	Gen.Surgery	GenSx	2019-08-04		Excision (Lipoma back )	Others | Non Essential		38	M		Not available	Non-Essential	Non-Essential	4	4		Elective
3441	PB File	MAMC	Hosp-3	Apr-19	Gen.Surgery	GenSx	2019-08-04		Pyelolithotomy	Others | Non Essential		55	M		General Anaesthesia	Non-Essential	Non-Essential	4	4		Elective
3442	PB File	MAMC	Hosp-3	Apr-19	Gen.Surgery	GenSx	2019-08-04		Muscle biopsy	Others | Non Essential		62	F		Local anesthesia not supplemented by sedation or GA	Non-Essential	Non-Essential	4	4		Elective
3443	PB File	MAMC	Hosp-3	Apr-19	Gen.Surgery	GenSx	2019-08-04		Excision (Fibroadenoma)	Others | Non Essential		32	F		Local anesthesia not supplemented by sedation or GA	Non-Essential	Non-Essential	4	4		Elective
3444	PB File	MAMC	Hosp-3	Apr-19	Gen.Surgery	GenSx	2019-09-04		Trucut Biopsy	Others | Non Essential		32	F		Local anesthesia not supplemented by sedation or GA	Non-Essential	Non-Essential	4	4		Elective
3445	PB File	MAMC	Hosp-3	Apr-19	Gen.Surgery	GenSx	2019-09-04		Mastectomy (palliative)	Others | Non Essential		58	F		General Anaesthesia	Non-Essential	Non-Essential	4	4		Elective
3446	PB File	MAMC	Hosp-3	Apr-19	Gen.Surgery	GenSx	2019-09-04		Lap Orchiopexy for undescended testis	Others | Non Essential		30	M		Not available	Non-Essential	Non-Essential	4	4		Elective
3447	PB File	MAMC	Hosp-3	Apr-19	Gen.Surgery	GenSx	2019-09-04		Fistulectomy	Others | Non Essential		20	M		Local anesthesia not supplemented by sedation or GA	Non-Essential	Non-Essential	4	4		Elective
3448	PB File	MAMC	Hosp-3	Apr-19	Gen.Surgery	GenSx	2019-09-04		Lipoma Excision	Others | Non Essential		55	M		Local anesthesia not supplemented by sedation or GA	Non-Essential	Non-Essential	4	4		Elective
3449	PB File	MAMC	Hosp-3	Apr-19	Gen.Surgery	GenSx	2019-09-04		Stoma closure	Others | Non Essential		75	F		General Anaesthesia	Non-Essential	Non-Essential	4	4		Elective
3450	PB File	MAMC	Hosp-3	Apr-19	Gen.Surgery	GenSx	2019-09-04		Orchiopexy (for torsion testis)	Others | Non Essential		15	M		Regional Anesthesia: Spinal, Epidural and Regional Blocks	Non-Essential	Non-Essential	1	1		Elective
3451	PB File	MAMC	Hosp-3	Apr-19	Gen.Surgery	GenSx	2019-10-04		Chemoport insertion (breast)	Others | Non Essential		35	F		Local anesthesia not supplemented by sedation or GA	Non-Essential	Non-Essential	4	4		Elective
3452	PB File	MAMC	Hosp-3	Apr-19	Gen.Surgery	GenSx	2019-10-04		Orchidectomy (RT & LT )	Others | Non Essential		21	M		Regional Anesthesia: Spinal, Epidural and Regional Blocks	Non-Essential	Non-Essential	4	4		Elective
3453	PB File	MAMC	Hosp-3	Apr-19	Gen.Surgery	GenSx	2019-10-04		Fistulectomy	Others | Non Essential		38	M		Regional Anesthesia: Spinal, Epidural and Regional Blocks	Non-Essential	Non-Essential	4	4		Elective
3454	PB File	MAMC	Hosp-3	Apr-19	Gen.Surgery	GenSx	2019-10-04		Ear Hole Repairing (Lobuloplasty)	Others | Non Essential		53	F		Local anesthesia not supplemented by sedation or GA	Non-Essential	Non-Essential	4	4		Elective
3455	PB File	MAMC	Hosp-3	Apr-19	Gen.Surgery	GenSx	2019-10-04		Excision (Fibroadenoma)	Others | Non Essential		17	F		Local anesthesia not supplemented by sedation or GA	Non-Essential	Non-Essential	4	4		Elective
3456	PB File	MAMC	Hosp-3	Apr-19	Gen.Surgery	GenSx	2019-10-04		Orchidectomy Bilateral (Ca Prostate)	Others | Non Essential		60	M		Local anesthesia not supplemented by sedation or GA	Non-Essential	Non-Essential	4	4		Elective
3457	PB File	MAMC	Hosp-3	Apr-19	Gen.Surgery	GenSx	2019-11-04		Total Penectomy (Ca Penis)	Others | Non Essential		55	M		Not available	Non-Essential	Non-Essential	2	2		Elective
3458	PB File	MAMC	Hosp-3	Apr-19	Gen.Surgery	GenSx	2019-11-04		Fibroadenoma excision	Others | Non Essential		18	F		General Anaesthesia	Non-Essential	Non-Essential	4	4		Elective
3459	PB File	MAMC	Hosp-3	Apr-19	Gen.Surgery	GenSx	2019-11-04		Lymph node excision	Others | Non Essential		52	F		Local anesthesia not supplemented by sedation or GA	Non-Essential	Non-Essential	4	4		Elective
3460	PB File	MAMC	Hosp-3	Apr-19	Gen.Surgery	GenSx	2019-11-04		Stoma closure	Others | Non Essential		20	F		General Anaesthesia	Non-Essential	Non-Essential	4	4		Elective
3461	PB File	MAMC	Hosp-3	Apr-19	Gen.Surgery	GenSx	2019-11-04		Axillary lymph node excision	Others | Non Essential		70	F		Local anesthesia not supplemented by sedation or GA	Non-Essential	Non-Essential	4	4		Elective
3462	PB File	MAMC	Hosp-3	Apr-19	Gen.Surgery	GenSx	2019-11-04		Excision (Dermoid cyst)	Others | Non Essential		50	F		Local anesthesia not supplemented by sedation or GA	Non-Essential	Non-Essential	4	4		Elective
3463	PB File	MAMC	Hosp-3	Apr-19	Gen.Surgery	GenSx	2019-11-04		Excision (Nail for Paronychia)	Others | Non Essential		22	M		Local anesthesia not supplemented by sedation or GA	Non-Essential	Non-Essential	4	4		Elective
3464	PB File	MAMC	Hosp-3	Apr-19	Gen.Surgery	GenSx	2019-11-04		Excision (Lipoma back )	Others | Non Essential		40	F		Local anesthesia not supplemented by sedation or GA	Non-Essential	Non-Essential	4	4		Elective
3465	PB File	MAMC	Hosp-3	Apr-19	Gen.Surgery	GenSx	2019-11-04		Excision (Sebaceous cyst )	Others | Non Essential		33	M		Local anesthesia not supplemented by sedation or GA	Non-Essential	Non-Essential	4	4		Elective
3466	PB File	MAMC	Hosp-3	Apr-19	Gen.Surgery	GenSx	2019-12-04		Excision (Dermoid cyst)	Others | Non Essential		19	M		Local anesthesia not supplemented by sedation or GA	Non-Essential	Non-Essential	4	4		Elective
3467	PB File	MAMC	Hosp-3	Apr-19	Gen.Surgery	GenSx	2019-04-13		Lipoma Excision	Others | Non Essential		62	M		Local anesthesia not supplemented by sedation or GA	Non-Essential	Non-Essential	4	4		Elective
3468	PB File	MAMC	Hosp-3	Apr-19	Gen.Surgery	GenSx	2019-04-13		Swelling Excision	Others | Non Essential		41	F		Local anesthesia not supplemented by sedation or GA	Non-Essential	Non-Essential	4	4		Elective
3469	PB File	MAMC	Hosp-3	Apr-19	Gen.Surgery	GenSx	2019-04-13		Adrenalectomy	Others | Non Essential		32	M		General Anaesthesia	Non-Essential	Non-Essential	4	4		Elective
3470	PB File	MAMC	Hosp-3	Apr-19	Gen.Surgery	GenSx	2019-04-15		Lap B/L TEP	Others | Non Essential		42	M		General Anaesthesia	Non-Essential	Non-Essential	4	4		Elective
3471	PB File	MAMC	Hosp-3	Apr-19	Gen.Surgery	GenSx	2019-04-15		Open Pyelolithotomy	Others | Non Essential		43	F		General Anaesthesia	Non-Essential	Non-Essential	4	4		Elective
3472	PB File	MAMC	Hosp-3	Apr-19	Gen.Surgery	GenSx	2019-04-15		Sec Suturing	Others | Non Essential		30	F		General Anaesthesia	Non-Essential	Non-Essential	4	4		Elective
3473	PB File	MAMC	Hosp-3	Apr-19	Gen.Surgery	GenSx	2019-04-15		Stoma closure	Others | Non Essential		18	M		General Anaesthesia	Non-Essential	Non-Essential	4	4		Elective
3474	PB File	MAMC	Hosp-3	Apr-19	Gen.Surgery	GenSx	2019-04-15		Fibroadenoma excision	Others | Non Essential		20	F		General Anaesthesia	Non-Essential	Non-Essential	4	4		Elective
3475	PB File	MAMC	Hosp-3	Apr-19	Gen.Surgery	GenSx	2019-04-15		Lump Biopsy	Others | Non Essential		23	M		Local anesthesia not supplemented by sedation or GA	Non-Essential	Non-Essential	4	4		Elective
3476	PB File	MAMC	Hosp-3	Apr-19	Gen.Surgery	GenSx	2019-04-15		Flap surgery (Pilonidal sinus)	Others | Non Essential		40	F		Local anesthesia not supplemented by sedation or GA	Non-Essential	Non-Essential	4	4		Elective
3477	PB File	MAMC	Hosp-3	Apr-19	Gen.Surgery	GenSx	2019-04-16		Excision (Sebaceous cyst )	Others | Non Essential		24	F		Local anesthesia not supplemented by sedation or GA	Non-Essential	Non-Essential	4	4		Elective
3478	PB File	MAMC	Hosp-3	Apr-19	Gen.Surgery	GenSx	2019-04-16		Low Anterior Resection (Rectal Cancer)	Others | Non Essential		38	F		General Anaesthesia	Non-Essential	Non-Essential	3	3		Elective
3479	PB File	MAMC	Hosp-3	Apr-19	Gen.Surgery	GenSx	2019-04-16		Fistulotomy & seton placement	Others | Non Essential		63	M		Local anesthesia not supplemented by sedation or GA	Non-Essential	Non-Essential	4	4		Elective
3480	PB File	MAMC	Hosp-3	Apr-19	Gen.Surgery	GenSx	2019-04-16		Fistulotomy & seton placement	Others | Non Essential		29	F		Local anesthesia not supplemented by sedation or GA	Non-Essential	Non-Essential	4	4		Elective
3481	PB File	MAMC	Hosp-3	Apr-19	Gen.Surgery	GenSx	2019-04-16		Fistulotomy & seton placement	Others | Non Essential		45	M		Local anesthesia not supplemented by sedation or GA	Non-Essential	Non-Essential	4	4		Elective
3482	PB File	MAMC	Hosp-3	Apr-19	Gen.Surgery	GenSx	2019-04-16		Fistulectomy	Others | Non Essential		42	M		Local anesthesia not supplemented by sedation or GA	Non-Essential	Non-Essential	4	4		Elective
3483	PB File	MAMC	Hosp-3	Apr-19	Gen.Surgery	GenSx	2019-04-18		Partial Nephrectomy	Others | Non Essential		60	F		General Anaesthesia	Non-Essential	Non-Essential	4	4		Elective
3484	PB File	MAMC	Hosp-3	Apr-19	Gen.Surgery	GenSx	2019-04-18		Radical nephrectomy & thrombectomy	Others | Non Essential		55	F		General Anaesthesia	Non-Essential	Non-Essential	2	2		Elective
3485	PB File	MAMC	Hosp-3	Apr-19	Gen.Surgery	GenSx	2019-04-18		Gastro-jejunostomy (GOO)	Others | Non Essential		60	F		Not available	Non-Essential	Non-Essential	2	2		Elective
3486	PB File	MAMC	Hosp-3	Apr-19	Gen.Surgery	GenSx	2019-04-18		Lap B/L TEP Open	Others | Non Essential		48	M		General Anaesthesia	Non-Essential	Non-Essential	2	2		Elective
3487	PB File	MAMC	Hosp-3	Apr-19	Gen.Surgery	GenSx	2019-04-18		Excision (Sebaceous cyst )	Others | Non Essential		40	F		Local anesthesia not supplemented by sedation or GA	Non-Essential	Non-Essential	4	4		Elective
3488	PB File	MAMC	Hosp-3	Apr-19	Gen.Surgery	GenSx	2019-04-18		Excision (Fibroadenoma)	Others | Non Essential		19	F		General Anaesthesia	Non-Essential	Non-Essential	4	4		Elective
3489	PB File	MAMC	Hosp-3	Apr-19	Gen.Surgery	GenSx	2019-04-20		Stoma closure	Others | Non Essential		71	F		General Anaesthesia	Non-Essential	Non-Essential	4	4		Elective
3490	PB File	MAMC	Hosp-3	Apr-19	Gen.Surgery	GenSx	2019-04-20		Pyelolithotomy for Renal Calculus	Others | Non Essential		37	F		General Anaesthesia	Non-Essential	Non-Essential	4	4		Elective
3491	PB File	MAMC	Hosp-3	Apr-19	Gen.Surgery	GenSx	2019-04-20		Fistulotomy & seton placement	Others | Non Essential		35	M		Regional Anesthesia: Spinal, Epidural and Regional Blocks	Non-Essential	Non-Essential	4	4		Elective
3492	PB File	MAMC	Hosp-3	Apr-19	Gen.Surgery	GenSx	2019-04-20		Fistulectomy	Others | Non Essential		41	M		Regional Anesthesia: Spinal, Epidural and Regional Blocks	Non-Essential	Non-Essential	4	4		Elective
3493	PB File	MAMC	Hosp-3	Apr-19	Gen.Surgery	GenSx	2019-04-20		Cyst Excision	Others | Non Essential		55	M		Local anesthesia not supplemented by sedation or GA	Non-Essential	Non-Essential	4	4		Elective
3494	PB File	MAMC	Hosp-3	Apr-19	Gen.Surgery	GenSx	2019-04-22		Lap B/L TEP	Others | Non Essential		65	M		General Anaesthesia	Non-Essential	Non-Essential	4	4		Elective
3495	PB File	MAMC	Hosp-3	Apr-19	Gen.Surgery	GenSx	2019-04-22		Radical nephrectomy	Others | Non Essential		55	M		General Anaesthesia	Non-Essential	Non-Essential	2	2		Elective
3496	PB File	MAMC	Hosp-3	Apr-19	Gen.Surgery	GenSx	2019-04-22		Excision (Lipoma back )	Others | Non Essential		30	M		General Anaesthesia	Non-Essential	Non-Essential	4	4		Elective
3497	PB File	MAMC	Hosp-3	Apr-19	Gen.Surgery	GenSx	2019-04-22		Excision	Others | Non Essential		85	M		Local anesthesia not supplemented by sedation or GA	Non-Essential	Non-Essential	4	4		Elective
3498	PB File	MAMC	Hosp-3	Apr-19	Gen.Surgery	GenSx	2019-04-22		Seton Placement	Others | Non Essential		50	M		Local anesthesia not supplemented by sedation or GA	Non-Essential	Non-Essential	4	4		Elective
3499	PB File	MAMC	Hosp-3	Apr-19	Gen.Surgery	GenSx	2019-04-22		Sec Suturing	Others | Non Essential		45	M		Local anesthesia not supplemented by sedation or GA	Non-Essential	Non-Essential	4	4		Elective
3500	PB File	MAMC	Hosp-3	Apr-19	Gen.Surgery	GenSx	2019-04-23		Lap TEP	Others | Non Essential		62	M		General Anaesthesia	Non-Essential	Non-Essential	4	4		Elective
3501	PB File	MAMC	Hosp-3	Apr-19	Gen.Surgery	GenSx	2019-04-23		Radical nephrectomy	Others | Non Essential		55	M		General Anaesthesia	Non-Essential	Non-Essential	2	2		Elective
3502	PB File	MAMC	Hosp-3	Apr-19	Gen.Surgery	GenSx	2019-04-23		Excision	Others | Non Essential		39	M		Local anesthesia not supplemented by sedation or GA	Non-Essential	Non-Essential	4	4		Elective
3503	PB File	MAMC	Hosp-3	Apr-19	Gen.Surgery	GenSx	2019-04-23		Lap Hyadatid Cyst evacuation	Others | Non Essential		45	M		General Anaesthesia	Non-Essential	Non-Essential	4	4		Elective
3504	PB File	MAMC	Hosp-3	Apr-19	Gen.Surgery	GenSx	2019-04-23		Excision	Others | Non Essential		17	F		Local anesthesia not supplemented by sedation or GA	Non-Essential	Non-Essential	4	4		Elective
3505	PB File	MAMC	Hosp-3	Apr-19	Gen.Surgery	GenSx	2019-04-23		Lipoma Excision	Others | Non Essential		44	M		Local anesthesia not supplemented by sedation or GA	Non-Essential	Non-Essential	4	4		Elective
3506	PB File	MAMC	Hosp-3	Apr-19	Gen.Surgery	GenSx	2019-04-24		Chemoport insertion (breast)	Others | Non Essential		35	F		Local anesthesia not supplemented by sedation or GA	Non-Essential	Non-Essential	4	4		Elective
3507	PB File	MAMC	Hosp-3	Apr-19	Gen.Surgery	GenSx	2019-04-24		Fistulectomy	Others | Non Essential		45	M		Regional Anesthesia: Spinal, Epidural and Regional Blocks	Non-Essential	Non-Essential	4	4		Elective
3508	PB File	MAMC	Hosp-3	Apr-19	Gen.Surgery	GenSx	2019-04-24		Hemithyroidectomy	Others | Non Essential		18	F		General Anaesthesia	Non-Essential	Non-Essential	2	2		Elective
3509	PB File	MAMC	Hosp-3	Apr-19	Gen.Surgery	GenSx	2019-04-25		Lap Rectopexy	Others | Non Essential		40	F		General Anaesthesia	Non-Essential	Non-Essential	4	4		Elective
3510	PB File	MAMC	Hosp-3	Apr-19	Gen.Surgery	GenSx	2019-04-25		Right Hemicolectomy (Bowel Mass)	Others | Non Essential		31	M		General Anaesthesia	Non-Essential	Non-Essential	2	2		Elective
3511	PB File	MAMC	Hosp-3	Apr-19	Gen.Surgery	GenSx	2019-04-25		Total Thyroidectomy	Others | Non Essential		60	F		General Anaesthesia	Non-Essential	Non-Essential	2	2		Elective
3512	PB File	MAMC	Hosp-3	Apr-19	Gen.Surgery	GenSx	2019-04-25		Excision (lipoma back)	Others | Non Essential		40	M		Local anesthesia not supplemented by sedation or GA	Non-Essential	Non-Essential	4	4		Elective
3513	PB File	MAMC	Hosp-3	Apr-19	Gen.Surgery	GenSx	2019-04-25		Excision (Sebaceous cyst )	Others | Non Essential		40	F		Local anesthesia not supplemented by sedation or GA	Non-Essential	Non-Essential	4	4		Elective
3514	PB File	MAMC	Hosp-3	Apr-19	Gen.Surgery	GenSx	2019-04-25		Excision (Sebaceous cyst )	Others | Non Essential		27	F		Local anesthesia not supplemented by sedation or GA	Non-Essential	Non-Essential	4	4		Elective
3515	PB File	MAMC	Hosp-3	Apr-19	Gen.Surgery	GenSx	2019-04-25		L.N.Biopsy	Others | Non Essential		58	F		Local anesthesia not supplemented by sedation or GA	Non-Essential	Non-Essential	4	4		Elective
3516	PB File	MAMC	Hosp-3	Apr-19	Gen.Surgery	GenSx	2019-04-25		Varicose Vein Surgery	Others | Non Essential		36	M		Regional Anesthesia: Spinal, Epidural and Regional Blocks	Non-Essential	Non-Essential	4	4		Elective
3517	PB File	MAMC	Hosp-3	Apr-19	Gen.Surgery	GenSx	2019-04-25		Lap TEP	Others | Non Essential		68	M		General Anaesthesia	Non-Essential	Non-Essential	4	4		Elective
3518	PB File	MAMC	Hosp-3	Apr-19	Gen.Surgery	GenSx	2019-04-26		Radical Cystectomy (Ca Bladder)	Others | Non Essential		75	M		General Anaesthesia	Non-Essential	Non-Essential	2	2		Elective
3519	PB File	MAMC	Hosp-3	Apr-19	Gen.Surgery	GenSx	2019-04-26		Pyelolithotomy for Renal Calculus	Others | Non Essential		30	M		General Anaesthesia	Non-Essential	Non-Essential	4	4		Elective
3520	PB File	MAMC	Hosp-3	Apr-19	Gen.Surgery	GenSx	2019-04-26		Pilonidal Sinus Excision	Others | Non Essential		25	M		General Anaesthesia	Non-Essential	Non-Essential	4	4		Elective
3521	PB File	MAMC	Hosp-3	Apr-19	Gen.Surgery	GenSx	2019-04-26		Excision	Others | Non Essential		16	F		Local anesthesia not supplemented by sedation or GA	Non-Essential	Non-Essential	4	4		Elective
3522	PB File	MAMC	Hosp-3	Apr-19	Gen.Surgery	GenSx	2019-04-26		Stoma closure	Others | Non Essential		25	M		General Anaesthesia	Non-Essential	Non-Essential	4	4		Elective
3523	PB File	MAMC	Hosp-3	Apr-19	Gen.Surgery	GenSx	2019-04-26		Fistulotomy & seton placement	Others | Non Essential		30	M		Local anesthesia not supplemented by sedation or GA	Non-Essential	Non-Essential	4	4		Elective
3524	PB File	MAMC	Hosp-3	Apr-19	Gen.Surgery	GenSx	2019-04-27		Stoma closure	Others | Non Essential		20	M		General Anaesthesia	Non-Essential	Non-Essential	4	4		Elective
3525	PB File	MAMC	Hosp-3	Apr-19	Gen.Surgery	GenSx	2019-04-27		Stoma closure	Others | Non Essential		25	F		General Anaesthesia	Non-Essential	Non-Essential	4	4		Elective
3526	PB File	MAMC	Hosp-3	Apr-19	Gen.Surgery	GenSx	2019-04-27		Lap Sleeve Gastrectomy	Others | Non Essential		48	F		General Anaesthesia	Non-Essential	Non-Essential	4	4		Elective
3527	PB File	MAMC	Hosp-3	Apr-19	Gen.Surgery	GenSx	2019-04-27		Excision	Others | Non Essential		24	F		Local anesthesia not supplemented by sedation or GA	Non-Essential	Non-Essential	4	4		Elective
3528	PB File	MAMC	Hosp-3	Apr-19	Gen.Surgery	GenSx	2019-04-27		Excision (Sebaceous cyst )	Others | Non Essential		30	F		Local anesthesia not supplemented by sedation or GA	Non-Essential	Non-Essential	4	4		Elective
3529	PB File	MAMC	Hosp-3	Apr-19	Gen.Surgery	GenSx	2019-04-29		Excision( Swelling arm )	Others | Non Essential		43	F		Local anesthesia not supplemented by sedation or GA	Non-Essential	Non-Essential	4	4		Elective
3530	PB File	MAMC	Hosp-3	Apr-19	Orthopedics	Ortho	2019-01-04		DECOMPRESSION WITH POSTERIOR INSTRUMENTATION	Others | Non Essential		30	M		General Anaesthesia	Non-Essential	Non-Essential	4	4		Elective
3531	PB File	MAMC	Hosp-3	Apr-19	Orthopedics	Ortho	2019-01-04		BIPOLAR HEMIARTHROPLASTY	Others | Non Essential		60	F		Regional Anesthesia: Spinal, Epidural and Regional Blocks	Non-Essential	Non-Essential	4	4		Elective
3532	PB File	MAMC	Hosp-3	Apr-19	Orthopedics	Ortho	2019-02-04		IMPLANT REMOVAL	Others | Non Essential		15	M		Regional Anesthesia: Spinal, Epidural and Regional Blocks	Non-Essential	Non-Essential	4	4		Elective
3533	PB File	MAMC	Hosp-3	Apr-19	Orthopedics	Ortho	2019-03-04		VALGUS OSTEOTOMY	Others | Non Essential		55	M		Regional Anesthesia: Spinal, Epidural and Regional Blocks	Non-Essential	Non-Essential	4	4		Elective
3534	PB File	MAMC	Hosp-3	Apr-19	Orthopedics	Ortho	2019-04-04		CARPAL TUNNEL RELECTIVEASE	Others | Non Essential		54	F		Local anesthesia not supplemented by sedation or GA	Non-Essential	Non-Essential	4	4		Elective
3535	PB File	MAMC	Hosp-3	Apr-19	Orthopedics	Ortho	2019-05-04		SCREW REVISION	Others | Non Essential		55	M		Regional Anesthesia: Spinal, Epidural and Regional Blocks	Non-Essential	Non-Essential	4	4		Elective
3536	PB File	MAMC	Hosp-3	Apr-19	Orthopedics	Ortho	2019-05-04		IMPLANT REMOVAL	Others | Non Essential		19	M		Regional Anesthesia: Spinal, Epidural and Regional Blocks	Non-Essential	Non-Essential	4	4		Elective
3537	PB File	MAMC	Hosp-3	Apr-19	Orthopedics	Ortho	2019-06-04		EXCISION OF GANGLION	Others | Non Essential		44	M		Local anesthesia not supplemented by sedation or GA	Non-Essential	Non-Essential	4	4		Elective
3538	PB File	MAMC	Hosp-3	Apr-19	Orthopedics	Ortho	2019-07-04		IMPLANT REMOVAL	Others | Non Essential		19	M		Regional Anesthesia: Spinal, Epidural and Regional Blocks	Non-Essential	Non-Essential	4	4		Elective
3539	PB File	MAMC	Hosp-3	Apr-19	Orthopedics	Ortho	2019-08-04		BIPOLAR HEMIARTHROPLASTY	Others | Non Essential		77	M		Regional Anesthesia: Spinal, Epidural and Regional Blocks	Non-Essential	Non-Essential	4	4		Elective
3540	PB File	MAMC	Hosp-3	Apr-19	Orthopedics	Ortho	2019-10-04		HEMIARTHROPLASTY	Others | Non Essential		55	F		Regional Anesthesia: Spinal, Epidural and Regional Blocks	Essential	Non-essential	4	2		Elective
3541	PB File	MAMC	Hosp-3	Apr-19	Orthopedics	Ortho	2019-10-04		BIPOLAR HEMIARTHROPLASTY	Others | Non Essential		62	F		Regional Anesthesia: Spinal, Epidural and Regional Blocks	Non-Essential	Non-Essential	4	4		Elective
3542	PB File	MAMC	Hosp-3	Apr-19	Orthopedics	Ortho	2019-11-04		BIPOLAR HEMIARTHROPLASTY	Others | Non Essential		60	F		Regional Anesthesia: Spinal, Epidural and Regional Blocks	Non-Essential	Non-Essential	4	4		Elective
3543	PB File	MAMC	Hosp-3	Apr-19	Orthopedics	Ortho	2019-12-04		FHILOS	Others | Non Essential		37	M		General Anaesthesia	Non-Essential	Non-Essential	4	4		Elective
3544	PB File	MAMC	Hosp-3	Apr-19	Orthopedics	Ortho	20/4/2019		BIPOLAR HEMIARTHROPLASTY	Others | Non Essential		65	M		Regional Anesthesia: Spinal, Epidural and Regional Blocks	Non-Essential	Non-Essential	4	4		Elective
3545	PB File	MAMC	Hosp-3	Apr-19	Orthopedics	Ortho	20/4/2019		FHILOS	Others | Non Essential		60	M		General Anaesthesia	Non-Essential	Non-Essential	4	4		Elective
3546	PB File	MAMC	Hosp-3	Apr-19	Orthopedics	Ortho	22/4/2019		ACL RECONSTRUCTION WITH MENISECTOMY	Others | Non Essential		23	M		Regional Anesthesia: Spinal, Epidural and Regional Blocks	Non-Essential	Non-Essential	4	4		Elective
3547	PB File	MAMC	Hosp-3	Apr-19	Orthopedics	Ortho	23/4/2019		PEDICLE SCEW FIXATION	Others | Non Essential		20	M		General Anaesthesia	Non-Essential	Non-Essential	4	4		Elective
3548	PB File	MAMC	Hosp-3	Apr-19	Orthopedics	Ortho	25/4/2019		DECOMPRESSION WITH POSTERIOR INSTRUMENTATION	Others | Non Essential		23	F		General Anaesthesia	Non-Essential	Non-Essential	4	4		Elective
3549	PB File	MAMC	Hosp-3	Apr-19	Orthopedics	Ortho	28/4/2019		SCREW REMOVAL WITH LAVAGE	Others | Non Essential		60	M		General Anaesthesia	Non-Essential	Non-Essential	4	4		Elective
3550	PB File	MAMC	Hosp-3	Apr-19	Orthopedics	Ortho	29/4/2019		ACL RECONSTRUCTION	Others | Non Essential		34	M		Regional Anesthesia: Spinal, Epidural and Regional Blocks	Non-Essential	Non-Essential	4	4		Elective
3551	PB File	MAMC	Hosp-3	Apr-19	Orthopedics	Ortho	29/4/2019		PCL RECONSTRUCTION	Others | Non Essential		34	M		Regional Anesthesia: Spinal, Epidural and Regional Blocks	Non-Essential	Non-Essential	4	4		Elective
3552	PB File	MAMC	Hosp-3	Apr-19	Orthopedics	Ortho	30/4/2019		DECOMPRESSION WITH POSTERIOR INSTRUMENTATION	Others | Non Essential		28	M		General Anaesthesia	Non-Essential	Non-Essential	4	4		Elective
3553	PB File	MAMC	Hosp-3	Apr-19	Orthopedics	Ortho	2019-04-01		ULNAR+ MEDIAN NERVE EXPLORATION	Others | Non Essential		44	M		General Anaesthesia	Non-Essential	Non-Essential	4	4		Elective
3554	PB File	MAMC	Hosp-3	Apr-19	Orthopedics	Ortho	2019-04-01		RT M MENISCECTOMY+CHONDROPLASTY	Others | Non Essential		38	M		Regional Anesthesia: Spinal, Epidural and Regional Blocks	Non-Essential	Non-Essential	4	4		Elective
3555	PB File	MAMC	Hosp-3	Apr-19	Orthopedics	Ortho	2019-04-01		EXCHANGE NAILING +BG	Others | Non Essential		59	M		Regional Anesthesia: Spinal, Epidural and Regional Blocks	Non-Essential	Non-Essential	4	4		Elective
3556	PB File	MAMC	Hosp-3	Apr-19	Orthopedics	Ortho	2019-04-01		GROWTH MODULATION WITH LAT EPIPHYSIODESIS	Others | Non Essential		13	M		General Anaesthesia	Non-Essential	Non-Essential	4	4		Elective
3557	PB File	MAMC	Hosp-3	Apr-19	Orthopedics	Ortho	2019-04-01		ARTHROSCOPIC SYNOVECTOMY	Others | Non Essential		50	M		Regional Anesthesia: Spinal, Epidural and Regional Blocks	Non-Essential	Non-Essential	4	4		Elective
3558	PB File	MAMC	Hosp-3	Apr-19	Orthopedics	Ortho	2019-04-02		DECOMPRESSION WITH DISCECTOMY	Others | Non Essential		59	M		General Anaesthesia	Non-Essential	Non-Essential	4	4		Elective
3559	PB File	MAMC	Hosp-3	Apr-19	Orthopedics	Ortho	2019-04-02		TKR	Others | Non Essential		62	F		Regional Anesthesia: Spinal, Epidural and Regional Blocks	Non-Essential	Non-Essential	4	4		Elective
3560	PB File	MAMC	Hosp-3	Apr-19	Orthopedics	Ortho	2019-04-02		ARTHRO. ACL RECONSTRUCTION	Others | Non Essential		35	M		Regional Anesthesia: Spinal, Epidural and Regional Blocks	Non-Essential	Non-Essential	4	4		Elective
3561	PB File	MAMC	Hosp-3	Apr-19	Orthopedics	Ortho	2019-04-03		TKR	Others | Non Essential		65	F		Regional Anesthesia: Spinal, Epidural and Regional Blocks	Non-Essential	Non-Essential	4	4		Elective
3562	PB File	MAMC	Hosp-3	Apr-19	Orthopedics	Ortho	2019-04-03		LATERJET PROCEDURE	Others | Non Essential		49	F		General Anaesthesia	Non-Essential	Non-Essential	4	4		Elective
3563	PB File	MAMC	Hosp-3	Apr-19	Orthopedics	Ortho	2019-04-03		ARTHRO. ACL RECONSTRUCTION	Others | Non Essential		42	M		Regional Anesthesia: Spinal, Epidural and Regional Blocks	Non-Essential	Non-Essential	4	4		Elective
3564	PB File	MAMC	Hosp-3	Apr-19	Orthopedics	Ortho	2019-04-03		TRIPLE ARTHRODESIS	Others | Non Essential		26	F		Regional Anesthesia: Spinal, Epidural and Regional Blocks	Non-Essential	Non-Essential	4	4		Elective
3565	PB File	MAMC	Hosp-3	Apr-19	Orthopedics	Ortho	2019-04-03		ALD	Others | Non Essential		55	F		General Anaesthesia	Non-Essential	Non-Essential	4	4		Elective
3566	PB File	MAMC	Hosp-3	Apr-19	Orthopedics	Ortho	2019-04-03		CORE DECOMPRESSION	Others | Non Essential		30	M		Regional Anesthesia: Spinal, Epidural and Regional Blocks	Non-Essential	Non-Essential	4	4		Elective
3567	PB File	MAMC	Hosp-3	Apr-19	Orthopedics	Ortho	2019-04-03		TIBIAL TUBEROSITY SHIFT WITH MPFL	Others | Non Essential		27	F		Regional Anesthesia: Spinal, Epidural and Regional Blocks	Non-Essential	Non-Essential	4	4		Elective
3568	PB File	MAMC	Hosp-3	Apr-19	Orthopedics	Ortho	2019-04-04		RT THR	Others | Non Essential		25	M		Regional Anesthesia: Spinal, Epidural and Regional Blocks	Non-Essential	Non-Essential	4	4		Elective
3569	PB File	MAMC	Hosp-3	Apr-19	Orthopedics	Ortho	2019-04-04		LT THR	Others | Non Essential		25	M		Regional Anesthesia: Spinal, Epidural and Regional Blocks	Non-Essential	Non-Essential	4	4		Elective
3570	PB File	MAMC	Hosp-3	Apr-19	Orthopedics	Ortho	2019-04-04		ARTHROSCOPIC DECOMPRESSION	Others | Non Essential		40	M		General Anaesthesia	Non-Essential	Non-Essential	4	4		Elective
3571	PB File	MAMC	Hosp-3	Apr-19	Orthopedics	Ortho	2019-04-04		SEQUESTRECTOMY WITH CURETTAGE	Others | Non Essential		42	M		Regional Anesthesia: Spinal, Epidural and Regional Blocks	Non-Essential	Non-Essential	4	4		Elective
3572	PB File	MAMC	Hosp-3	Apr-19	Orthopedics	Ortho	2019-04-04		ARTHROSCOPIC SYNOVECTOMY	Others | Non Essential		28	M		Regional Anesthesia: Spinal, Epidural and Regional Blocks	Non-Essential	Non-Essential	4	4		Elective
3573	PB File	MAMC	Hosp-3	Apr-19	Orthopedics	Ortho	2019-04-05		ARTHRO. ACL RECONSTRUCTION	Others | Non Essential		21	F		Regional Anesthesia: Spinal, Epidural and Regional Blocks	Non-Essential	Non-Essential	4	4		Elective
3574	PB File	MAMC	Hosp-3	Apr-19	Orthopedics	Ortho	2019-04-05		ENDOSCOPIC DECOMPRESSION	Others | Non Essential		65	M		General Anaesthesia	Non-Essential	Non-Essential	4	4		Elective
3575	PB File	MAMC	Hosp-3	Apr-19	Orthopedics	Ortho	2019-04-05		UNIPOLAR RELEASE OF RT SCM	Others | Non Essential		14	F		General Anaesthesia	Non-Essential	Non-Essential	4	4		Elective
3576	PB File	MAMC	Hosp-3	Apr-19	Orthopedics	Ortho	2019-04-05		DIAGNOSTIC ARTHROSCOPY WITH MENISCECTOMY	Others | Non Essential		31	M		Regional Anesthesia: Spinal, Epidural and Regional Blocks	Non-Essential	Non-Essential	4	4		Elective
3577	PB File	MAMC	Hosp-3	Apr-19	Orthopedics	Ortho	2019-04-06		THR	Others | Non Essential		30	M		Regional Anesthesia: Spinal, Epidural and Regional Blocks	Non-Essential	Non-Essential	4	4		Elective
3578	PB File	MAMC	Hosp-3	Apr-19	Orthopedics	Ortho	2019-04-06		DECOMPRESSION, INSTRUMENTATION AND CERVICAL PLATING	Others | Non Essential		16	F		General Anaesthesia	Non-Essential	Non-Essential	4	4		Elective
3579	PB File	MAMC	Hosp-3	Apr-19	Orthopedics	Ortho	2019-04-06		JESS FIXATION	Others | Non Essential		22	F		Regional Anesthesia: Spinal, Epidural and Regional Blocks	Non-Essential	Non-Essential	4	4		Elective
3580	PB File	MAMC	Hosp-3	Apr-19	Orthopedics	Ortho	2019-04-08		ARTHROSCOPIC ROTATOR CUFF REPAIR	Others | Non Essential		62	F		General Anaesthesia	Non-Essential	Non-Essential	4	4		Elective
3581	PB File	MAMC	Hosp-3	Apr-19	Orthopedics	Ortho	2019-04-08		(R)CTR	Others | Non Essential		48	F		General Anaesthesia	Non-Essential	Non-Essential	4	4		Elective
3582	PB File	MAMC	Hosp-3	Apr-19	Orthopedics	Ortho	2019-04-08		(L)THR	Others | Non Essential		34	M		Regional Anesthesia: Spinal, Epidural and Regional Blocks	Non-Essential	Non-Essential	4	4		Elective
3583	PB File	MAMC	Hosp-3	Apr-19	Orthopedics	Ortho	2019-04-08		TUMOUR EXCISION	Others | Non Essential		41	F		General Anaesthesia	Non-Essential	Non-Essential	4	4		Elective
3584	PB File	MAMC	Hosp-3	Apr-19	Orthopedics	Ortho	2019-04-08		ARTHROSCOPIC MICROFRACTURE	Others | Non Essential		12	M		Regional Anesthesia: Spinal, Epidural and Regional Blocks	Non-Essential	Non-Essential	4	4		Elective
3585	PB File	MAMC	Hosp-3	Apr-19	Orthopedics	Ortho	2019-04-08		ARTHROSCOPIC EVALUATION +MCL REPAIR	Others | Non Essential		40	M		Regional Anesthesia: Spinal, Epidural and Regional Blocks	Non-Essential	Non-Essential	4	4		Elective
3586	PB File	MAMC	Hosp-3	Apr-19	Orthopedics	Ortho	2019-04-09		(R)THR	Others | Non Essential		24	M		Regional Anesthesia: Spinal, Epidural and Regional Blocks	Non-Essential	Non-Essential	4	4		Elective
3587	PB File	MAMC	Hosp-3	Apr-19	Orthopedics	Ortho	2019-04-09		SCS FIXATION	Others | Non Essential		11	F		General Anaesthesia	Non-Essential	Non-Essential	4	4		Emergency
3588	PB File	MAMC	Hosp-3	Apr-19	Orthopedics	Ortho	2019-04-10		DECOMPRESSION WITH POSTERIOR FIXATION	Others | Non Essential		62	F		General Anaesthesia	Non-Essential	Non-Essential	4	4		Emergency
3589	PB File	MAMC	Hosp-3	Apr-19	Orthopedics	Ortho	2019-04-10		ARTHROSCOPIC ACL RECONSTRUCTION	Others | Non Essential		28	M		Regional Anesthesia: Spinal, Epidural and Regional Blocks	Non-Essential	Non-Essential	4	4		Elective
3590	PB File	MAMC	Hosp-3	Apr-19	Orthopedics	Ortho	2019-04-10		(L) TKR	Others | Non Essential		67	M		Regional Anesthesia: Spinal, Epidural and Regional Blocks	Non-Essential	Non-Essential	4	4		Elective
3591	PB File	MAMC	Hosp-3	Apr-19	Orthopedics	Ortho	2019-04-10		® TKR	Others | Non Essential		61	F		Regional Anesthesia: Spinal, Epidural and Regional Blocks	Non-Essential	Non-Essential	4	4		Elective
3592	PB File	MAMC	Hosp-3	Apr-19	Orthopedics	Ortho	2019-04-10		®ARTHROSCOPIC ACL RECONSTRUCTION	Others | Non Essential		22	M		Regional Anesthesia: Spinal, Epidural and Regional Blocks	Non-Essential	Non-Essential	4	4		Elective
3593	PB File	MAMC	Hosp-3	Apr-19	Orthopedics	Ortho	2019-04-10		TA LENGTHENING (L)	Others | Non Essential		21	M		General Anaesthesia	Non-Essential	Non-Essential	4	4		Elective
3594	PB File	MAMC	Hosp-3	Apr-19	Orthopedics	Ortho	2019-04-11		® TKR	Others | Non Essential		75	F		Regional Anesthesia: Spinal, Epidural and Regional Blocks	Non-Essential	Non-Essential	4	4		Elective
3595	PB File	MAMC	Hosp-3	Apr-19	Orthopedics	Ortho	2019-04-11		BIPOLAR HEMIARTHROPLASTY	Others | Non Essential		50	F		Regional Anesthesia: Spinal, Epidural and Regional Blocks	Non-Essential	Non-Essential	4	4		Elective
3596	PB File	MAMC	Hosp-3	Apr-19	Orthopedics	Ortho	2019-04-11		ALD	Others | Non Essential		16	F		General Anaesthesia	Non-Essential	Non-Essential	4	4		Elective
3597	PB File	MAMC	Hosp-3	Apr-19	Orthopedics	Ortho	2019-04-11		® THR	Others | Non Essential		21	F		Regional Anesthesia: Spinal, Epidural and Regional Blocks	Non-Essential	Non-Essential	4	4		Elective
3598	PB File	MAMC	Hosp-3	Apr-19	Orthopedics	Ortho	2019-04-12		®THR	Others | Non Essential		67	F		Regional Anesthesia: Spinal, Epidural and Regional Blocks	Non-Essential	Non-Essential	4	4		Elective
3599	PB File	MAMC	Hosp-3	Apr-19	Orthopedics	Ortho	2019-04-12		CTR	Others | Non Essential		23	M		Local anesthesia not supplemented by sedation or GA	Non-Essential	Non-Essential	4	4		Elective
3600	PB File	MAMC	Hosp-3	Apr-19	Orthopedics	Ortho	2019-04-12		ARTHROSCOPIC ACL RECONSTRUCTION	Others | Non Essential		23	M		Regional Anesthesia: Spinal, Epidural and Regional Blocks	Non-Essential	Non-Essential	4	4		Elective
3601	PB File	MAMC	Hosp-3	Apr-19	Orthopedics	Ortho	2019-04-12		REMOVAL UNDER C ARM	Others | Non Essential		5	M		General Anaesthesia	Non-Essential	Non-Essential	4	4		Emergency
3602	PB File	MAMC	Hosp-3	Apr-19	Orthopedics	Ortho	2019-04-13		RT TKR	Others | Non Essential		67	M		Regional Anesthesia: Spinal, Epidural and Regional Blocks	Non-Essential	Non-Essential	4	4		Elective
3603	PB File	MAMC	Hosp-3	Apr-19	Orthopedics	Ortho	2019-04-13		DECOMPRESSION	Others | Non Essential		17	F		General Anaesthesia	Non-Essential	Non-Essential	4	4		Elective
3604	PB File	MAMC	Hosp-3	Apr-19	Orthopedics	Ortho	2019-04-13		IMPLANT REMOVAL F/B ANTIBIOTIC CEMENT PLACEMENT	Others | Non Essential		60	F		Regional Anesthesia: Spinal, Epidural and Regional Blocks	Non-Essential	Non-Essential	4	4		Emergency
3605	PB File	MAMC	Hosp-3	Apr-19	Orthopedics	Ortho	2019-04-13		LT CORE DECOMPRESSION	Others | Non Essential		35	M		Regional Anesthesia: Spinal, Epidural and Regional Blocks	Non-Essential	Non-Essential	4	4		Elective
3606	PB File	MAMC	Hosp-3	Apr-19	Orthopedics	Ortho	2019-04-13		IMPLANT REMOVAL F/B ANTIBIOTIC CEMENT PLACEMENT	Others | Non Essential		65	M		Regional Anesthesia: Spinal, Epidural and Regional Blocks	Non-Essential	Non-Essential	4	4		Emergency
3607	PB File	MAMC	Hosp-3	Apr-19	Orthopedics	Ortho	2019-04-15		CR UNDER GA	Fracture reduction		7	M		General Anaesthesia	Essential	Essential	1	1		Emergency
3608	PB File	MAMC	Hosp-3	Apr-19	Orthopedics	Ortho	2019-04-15		RT THR	Others | Non Essential		62	M		Regional Anesthesia: Spinal, Epidural and Regional Blocks	Non-Essential	Non-Essential	4	4		Elective
3609	PB File	MAMC	Hosp-3	Apr-19	Orthopedics	Ortho	2109-04-15		ENDOSCOPIC DECOMPRESSION	Others | Non Essential		35	M		General Anaesthesia	Non-Essential	Non-Essential	4	4		Elective
3610	PB File	MAMC	Hosp-3	Apr-19	Orthopedics	Ortho	2019-04-15		LT THR	Others | Non Essential		33	M		Regional Anesthesia: Spinal, Epidural and Regional Blocks	Non-Essential	Non-Essential	4	4		Elective
3611	PB File	MAMC	Hosp-3	Apr-19	Orthopedics	Ortho	2019-04-15		BIOPSY	Others | Non Essential		18	F		Regional Anesthesia: Spinal, Epidural and Regional Blocks	Non-Essential	Non-Essential	4	4		Elective
3612	PB File	MAMC	Hosp-3	Apr-19	Orthopedics	Ortho	2019-04-15		ARTHROSCOPIC MENISCECTOMY	Others | Non Essential		14	F		Regional Anesthesia: Spinal, Epidural and Regional Blocks	Non-Essential	Non-Essential	4	4		Elective
3613	PB File	MAMC	Hosp-3	Apr-19	Orthopedics	Ortho	2019-04-15		ARTHROSCOPIC ACL RECONSTRUCTION	Others | Non Essential		24	M		Regional Anesthesia: Spinal, Epidural and Regional Blocks	Non-Essential	Non-Essential	4	4		Elective
3614	PB File	MAMC	Hosp-3	Apr-19	Orthopedics	Ortho	2019-04-16		ENDOSCOPIC DECOMPRESSION	Others | Non Essential		26	M		General Anaesthesia	Non-Essential	Non-Essential	4	4		Elective
3615	PB File	MAMC	Hosp-3	Apr-19	Orthopedics	Ortho	2019-04-16		POSTERIOR INSTRUMENTATION WITH PEDICLE SCREW	Others | Non Essential		24	M		General Anaesthesia	Non-Essential	Non-Essential	4	4		Emergency
3616	PB File	MAMC	Hosp-3	Apr-19	Orthopedics	Ortho	2019-04-16		WEDGELESS V SHAPED S/C OSTEOTOMY	Others | Non Essential		13	M		General Anaesthesia	Non-Essential	Non-Essential	4	4		Elective
3617	PB File	MAMC	Hosp-3	Apr-19	Orthopedics	Ortho	2019-04-16		ARTHROSCOPIC PARTIAL MENISCECTOMY	Others | Non Essential		15	M		Regional Anesthesia: Spinal, Epidural and Regional Blocks	Non-Essential	Non-Essential	4	4		Elective
3618	PB File	MAMC	Hosp-3	Apr-19	Orthopedics	Ortho	2019-04-16		LT PRC	Others | Non Essential		25	M		General Anaesthesia	Non-Essential	Non-Essential	4	4		Elective
3619	PB File	MAMC	Hosp-3	Apr-19	Orthopedics	Ortho	2019-04-18		STAGE 2 FDP TENDON REPAIR	Others | Non Essential		15	M		General Anaesthesia	Non-Essential	Non-Essential	4	4		Elective
3620	PB File	MAMC	Hosp-3	Apr-19	Orthopedics	Ortho	2019-04-18		BIPOLAR HEMIARTHROPLASTY	Others | Non Essential		80	M		Regional Anesthesia: Spinal, Epidural and Regional Blocks	Non-Essential	Non-Essential	4	4		Elective
3621	PB File	MAMC	Hosp-3	Apr-19	Orthopedics	Ortho	2019-04-18		B/L TKR	Others | Non Essential		55	M		Regional Anesthesia: Spinal, Epidural and Regional Blocks	Non-Essential	Non-Essential	4	4		Elective
3622	PB File	MAMC	Hosp-3	Apr-19	Orthopedics	Ortho	2019-04-18		RT TKR	Others | Non Essential		62	F		Regional Anesthesia: Spinal, Epidural and Regional Blocks	Non-Essential	Non-Essential	4	4		Elective
3623	PB File	MAMC	Hosp-3	Apr-19	Orthopedics	Ortho	2019-04-20		LT THR	Others | Non Essential		50	F		Regional Anesthesia: Spinal, Epidural and Regional Blocks	Non-Essential	Non-Essential	4	4		Elective
3624	PB File	MAMC	Hosp-3	Apr-19	Orthopedics	Ortho	2019-04-20		DECOMPRESSION + POST INSTRUMENTATION + CERVI PLATTING	Others | Non Essential		45	F		General Anaesthesia	Non-Essential	Non-Essential	4	4		Emergency
3625	PB File	MAMC	Hosp-3	Apr-19	Orthopedics	Ortho	2019-04-22		RT TKR	Others | Non Essential		74	F		Regional Anesthesia: Spinal, Epidural and Regional Blocks	Non-Essential	Non-Essential	4	4		Elective
3626	PB File	MAMC	Hosp-3	Apr-19	Orthopedics	Ortho	2019-04-22		ARTHROSCOPIC ACL +LCL+ PCL REPAIR	Others | Non Essential		19	M		Regional Anesthesia: Spinal, Epidural and Regional Blocks	Non-Essential	Non-Essential	4	4		Elective
3627	PB File	MAMC	Hosp-3	Apr-19	Orthopedics	Ortho	2019-04-22		PERCUTANEOUS FIXATION	Others | Non Essential		31	M		General Anaesthesia	Non-Essential	Non-Essential	4	4		Emergency
3628	PB File	MAMC	Hosp-3	Apr-19	Orthopedics	Ortho	2019-04-22		TUMOUR EXCISION	Others | Non Essential		45	M		General Anaesthesia	Non-Essential	Non-Essential	4	4		Elective
3629	PB File	MAMC	Hosp-3	Apr-19	Orthopedics	Ortho	2019-04-22		RT ARTHROSCOPIC ACL RECONSTRUCTION	Others | Non Essential		28	M		Regional Anesthesia: Spinal, Epidural and Regional Blocks	Non-Essential	Non-Essential	4	4		Elective
3630	PB File	MAMC	Hosp-3	Apr-19	Orthopedics	Ortho	2019-04-23		RT TKR	Others | Non Essential		53	F		Regional Anesthesia: Spinal, Epidural and Regional Blocks	Non-Essential	Non-Essential	4	4		Elective
3631	PB File	MAMC	Hosp-3	Apr-19	Orthopedics	Ortho	2019-04-23		ENDOSCOPIC DECOMPRESSION	Others | Non Essential		40	M		General Anaesthesia	Non-Essential	Non-Essential	4	4		Elective
3632	PB File	MAMC	Hosp-3	Apr-19	Orthopedics	Ortho	2019-04-23		DEFORMITY CORRECTION + FIXATION	Others | Non Essential		15	M		General Anaesthesia	Non-Essential	Non-Essential	4	4		Elective
3633	PB File	MAMC	Hosp-3	Apr-19	Orthopedics	Ortho	2019-04-23		ARTHROSCOPIC ACL RECONSTRUCTION	Others | Non Essential		28	M		Regional Anesthesia: Spinal, Epidural and Regional Blocks	Non-Essential	Non-Essential	4	4		Elective
3634	PB File	MAMC	Hosp-3	Apr-19	Orthopedics	Ortho	2019-04-23		VARUS OSTEOTOMY WITH B/L FIXATION	Others | Non Essential		12	M		General Anaesthesia	Non-Essential	Non-Essential	4	4		Elective
3638	PB File	MAMC	Hosp-3	Apr-19	Orthopedics	Ortho	2019-04-24		ARTHROSCOPIC PCL+ PLC RECONSTRUCTION	Others | Non Essential		31	M		Regional Anesthesia: Spinal, Epidural and Regional Blocks	Non-Essential	Non-Essential	4	4		Elective
3639	PB File	MAMC	Hosp-3	Apr-19	Orthopedics	Ortho	2019-04-25		BIPOLAR HEMIARTHROPLASTY	Others | Non Essential		74	F		Regional Anesthesia: Spinal, Epidural and Regional Blocks	Non-Essential	Non-Essential	4	4		Elective
3640	PB File	MAMC	Hosp-3	Apr-19	Orthopedics	Ortho	2019-04-25		RT TKR	Others | Non Essential		72	F		Regional Anesthesia: Spinal, Epidural and Regional Blocks	Non-Essential	Non-Essential	4	4		Elective
3641	PB File	MAMC	Hosp-3	Apr-19	Orthopedics	Ortho	2019-04-25		CTR RT	Others | Non Essential		25	M		General Anaesthesia	Non-Essential	Non-Essential	4	4		Elective
3643	PB File	MAMC	Hosp-3	Apr-19	Orthopedics	Ortho	2019-04-25		ARTHROSCOPIC PCL + OPEN MCL REPAIR	Others | Non Essential		21	M		Regional Anesthesia: Spinal, Epidural and Regional Blocks	Non-Essential	Non-Essential	4	4		Elective
3644	PB File	MAMC	Hosp-3	Apr-19	Orthopedics	Ortho	2019-04-26		PRC	Others | Non Essential		26	F		General Anaesthesia	Non-Essential	Non-Essential	4	4		Elective
3645	PB File	MAMC	Hosp-3	Apr-19	Orthopedics	Ortho	2019-04-26		ACL RECONSTRUCTION	Others | Non Essential		47	F		Regional Anesthesia: Spinal, Epidural and Regional Blocks	Non-Essential	Non-Essential	4	4		Elective
3647	PB File	MAMC	Hosp-3	Apr-19	Orthopedics	Ortho	2019-04-27		POSTERIOR DECOMPRESION WITH FIXATION	Others | Non Essential		60	M		General Anaesthesia	Non-Essential	Non-Essential	4	4		Emergency
3648	PB File	MAMC	Hosp-3	Apr-19	Orthopedics	Ortho	2019-04-27		BIPOLAR HEMIARTHROPLASTY	Others | Non Essential		60	F		Regional Anesthesia: Spinal, Epidural and Regional Blocks	Non-Essential	Non-Essential	4	4		Elective
3649	PB File	MAMC	Hosp-3	Apr-19	Orthopedics	Ortho	2019-04-27		LT PMTSR	Others | Non Essential		2	M		General Anaesthesia	Non-Essential	Non-Essential	4	4		Elective
3651	PB File	MAMC	Hosp-3	Apr-19	Ortho Em	Ortho	2019-01-04		Rt Knee Arthrotomy	Others | Non Essential		5	M		General Anaesthesia	Non-Essential	Non-Essential	4	4		Emergency
3655	PB File	MAMC	Hosp-3	Apr-19	Ortho Em	Ortho	2019-02-04		Implant removal	Others | Non Essential		29	F		Regional Anesthesia: Spinal, Epidural and Regional Blocks	Non-Essential	Non-Essential	4	4		Emergency
3657	PB File	MAMC	Hosp-3	Apr-19	Ortho Em	Ortho	2019-03-04		Sequestrectomy (osteomyelitis)	Others | Non Essential		10	M		Regional Anesthesia: Spinal, Epidural and Regional Blocks	Non-Essential	Non-Essential	4	4		Emergency
3658	PB File	MAMC	Hosp-3	Apr-19	Surgery Em	GenSx	2019-03-04		Stoma Revision	Others | Non Essential		18	F		General Anaesthesia	Non-Essential	Non-Essential	4	4		Emergency
3659	PB File	MAMC	Hosp-3	Apr-19	Surgery Em	GenSx	2019-04-04		Splenectomy (RTA & Hemoperitoneum)	Others | Non Essential		21	M		General Anaesthesia	Non-Essential	Non-Essential	1	1		Emergency
3660	PB File	MAMC	Hosp-3	Apr-19	Ortho Em	Ortho	2019-04-04		Vascular Repair (Popliteal A)	Others | Non Essential		19	M		General Anaesthesia	Non-Essential	Non-Essential	1	1		Emergency
3662	PB File	MAMC	Hosp-3	Apr-19	Ortho Em	Ortho	2019-06-04		Atherectomy	Others | Non Essential		19	M		General Anaesthesia	Non-Essential	Non-Essential	4	4		Emergency
3664	PB File	MAMC	Hosp-3	Apr-19	Surgery Em	GenSx	2019-07-04		Stoma Revision	Others | Non Essential		18	F		General Anaesthesia	Non-Essential	Non-Essential	4	4		Emergency
3665	PB File	MAMC	Hosp-3	Apr-19	Ortho Em	Ortho	2019-09-04		Arthrotomy	Others | Non Essential		62	M		Regional Anesthesia: Spinal, Epidural and Regional Blocks	Non-Essential	Non-Essential	4	4		Emergency
3666	PB File	MAMC	Hosp-3	Apr-19	Surgery Em	GenSx	2019-09-04		Stoma Revision	Others | Non Essential		17	M		General Anaesthesia	Non-Essential	Non-Essential	4	4		Emergency
3667	PB File	MAMC	Hosp-3	Apr-19	Surgery Em	GenSx	2019-09-04		Sphincterotomy (Anal Fissure)	Others | Non Essential		33	M		Regional Anesthesia: Spinal, Epidural and Regional Blocks	Non-Essential	Non-Essential	4	4		Emergency
3669	PB File	MAMC	Hosp-3	Apr-19	Ortho Em	Ortho	2019-10-04		Screw revision	Others | Non Essential		57	F		Local anesthesia not supplemented by sedation or GA	Non-Essential	Non-Essential	4	4		Emergency
3670	PB File	MAMC	Hosp-3	Apr-19	Ortho Em	Ortho	2019-11-04		Arthrotomy (Septic Arthritis)	Others | Non Essential		45	F		Regional Anesthesia: Spinal, Epidural and Regional Blocks	Non-Essential	Non-Essential	4	4		Emergency
3672	PB File	MAMC	Hosp-3	Apr-19	Ortho Em	Ortho	2019-12-04		Knee Arthrotomy	Others | Non Essential		48	M		Regional Anesthesia: Spinal, Epidural and Regional Blocks	Non-Essential	Non-Essential	4	4		Emergency
3673	PB File	MAMC	Hosp-3	Apr-19	Ortho Em	Ortho	2019-04-13		Knee Arthrotomy	Others | Non Essential		19	F		Regional Anesthesia: Spinal, Epidural and Regional Blocks	Non-Essential	Non-Essential	4	4		Emergency
3677	PB File	MAMC	Hosp-3	Apr-19	Surgery Em	GenSx	2019-04-15		Re Exploration and proceed	Others | Non Essential		26	M		General Anaesthesia	Non-Essential	Non-Essential	4	4		Emergency
3678	PB File	MAMC	Hosp-3	Apr-19	Surgery Em	GenSx	2019-04-15		Psoas Abscess (Drainage)	Others | Non Essential		16	F		General Anaesthesia	Non-Essential	Non-Essential	4	4		Emergency
3679	PB File	MAMC	Hosp-3	Apr-19	Ortho Em	Ortho	2019-04-15		Implant removal Lt leg	Others | Non Essential		40	M		Regional Anesthesia: Spinal, Epidural and Regional Blocks	Non-Essential	Non-Essential	4	4		Emergency
3681	PB File	MAMC	Hosp-3	Apr-19	Ortho Em	Ortho	2019-04-16		Arthrotomy	Others | Non Essential		14	F		Regional Anesthesia: Spinal, Epidural and Regional Blocks	Non-Essential	Non-Essential	4	4		Emergency
3682	PB File	MAMC	Hosp-3	Apr-19	Surgery Em	GenSx	2019-04-17		Pus drainage local site	Others | Non Essential		45	M		Local anesthesia not supplemented by sedation or GA	Non-Essential	Non-Essential	1	1		Emergency
3684	PB File	MAMC	Hosp-3	Apr-19	Ortho Em	Ortho	2019-04-17		Arthrotomy	Others | Non Essential		5	M		Regional Anesthesia: Spinal, Epidural and Regional Blocks	Non-Essential	Non-Essential	4	4		Emergency
3685	PB File	MAMC	Hosp-3	Apr-19	Ortho Em	Ortho	2019-04-18		Arthrotomy (Septic Arthritis)	Others | Non Essential		5	M		Regional Anesthesia: Spinal, Epidural and Regional Blocks	Non-Essential	Non-Essential	4	4		Emergency
3686	PB File	MAMC	Hosp-3	Apr-19	Ortho Em	Ortho	2019-04-18		Arthrotomy RT KNEE	Others | Non Essential		45	F		Regional Anesthesia: Spinal, Epidural and Regional Blocks	Non-Essential	Non-Essential	4	4		Emergency
3690	PB File	MAMC	Hosp-3	Apr-19	Surgery Em	GenSx	2019-04-20		Fistulotomy	Others | Non Essential		31	M		Local anesthesia not supplemented by sedation or GA	Non-Essential	Non-Essential	4	4		Emergency
3697	PB File	MAMC	Hosp-3	Apr-19	Surgery Em	GenSx	2019-04-24		Stoma Revision (Ischemic)	Others | Non Essential		26	F		General Anaesthesia	Non-Essential	Non-Essential	4	4		Emergency
3699	PB File	MAMC	Hosp-3	Apr-19	Ortho Em	Ortho	2019-04-24		Arthrotomy	Others | Non Essential		3	F		Regional Anesthesia: Spinal, Epidural and Regional Blocks	Non-Essential	Non-Essential	4	4		Emergency
3701	PB File	MAMC	Hosp-3	Apr-19	Ortho Em	Ortho	2019-04-25		Fixator for #BBL (RT)	Others | Non Essential		25	M		General Anaesthesia	Non-Essential	Non-Essential	4	4		Emergency
3702	PB File	MAMC	Hosp-3	Apr-19	Surgery Em	GenSx	2019-04-26		Feeding jejunostomy (Ca oesophagus)	Others | Non Essential		65	M		General Anaesthesia	Non-Essential	Non-Essential	1	1		Emergency
3704	PB File	MAMC	Hosp-3	Apr-19	Ortho Em	Ortho	2019-04-27		Arthrotomy for Septic arthriti	Others | Non Essential		15	M		General Anaesthesia	Non-Essential	Non-Essential	1	1		Emergency
3706	PB File	MAMC	Hosp-3	Apr-19	Ortho Em	Ortho	2019-04-28		Arthrotomy for Septic arthritis(rt)	Others | Non Essential		4	M		General Anaesthesia	Non-Essential	Non-Essential	1	1		Emergency
3707	PB File	MAMC	Hosp-3	Apr-19	Ortho Em	Ortho	2019-04-28		Implant removal (Rt) Clavicle plate	Others | Non Essential		27	M		General Anaesthesia	Non-Essential	Non-Essential	2	2		Elective
3708	PB File	MAMC	Hosp-3	Apr-19	Surgery Em	GenSx	2019-04-28		Feeding jejunostomy (Ca oesophagus)	Others | Non Essential		58	F		General Anaesthesia	Non-Essential	Non-Essential	1	1		Emergency
3710	PB File	MAMC	Hosp-3	Apr-19	Ortho Em	Ortho	2019-04-29		Endo button fixation for (Rt) Clavicle	Others | Non Essential		17	F		General Anaesthesia	Non-Essential	Non-Essential	1	1		Emergency
4033	PB File	Terna	Hosp-5	Apr-19	General Surgery	GenSx	2019-01-04		EXCISION OF LARGE LUMP ON NECK (Lymph node mass)	Others | Non Essential		999	F		General Anaesthesia	Essential	Non-Essential	1	1		Elective
4034	PB File	Terna	Hosp-5	Apr-19	General Surgery	GenSx	2019-01-04		STAPLER HAEMORRHOIDECTOMY	Others | Non Essential		999	M		Regional Anesthesia: Spinal, Epidural and Regional Blocks	Non-Essential	Non-Essential	4	4		Elective
4039	PB File	Terna	Hosp-5	Apr-19	General Surgery	GenSx	2019-01-04		STAPLER HAEMORRHOIDECTOMY	Others | Non Essential		999	F		Regional Anesthesia: Spinal, Epidural and Regional Blocks	Non-Essential	Non-Essential	4	4		Elective
4040	PB File	Terna	Hosp-5	Apr-19	General Surgery	GenSx	2019-02-04		OGDSCOPY FOR CHRONIC ACID PEPTIC DISEASE	Others | Non Essential		999	F		Local anesthesia not supplemented by sedation or GA	Non-Essential	Non-Essential	4	4		Elective
4041	PB File	Terna	Hosp-5	Apr-19	General Surgery	GenSx	2019-02-04		FISTULECTOMY WITH EXAMINATION UNDER ANAESTHESIA	Others | Non Essential		999	F		Regional Anesthesia: Spinal, Epidural and Regional Blocks	Essential	Non-Essential	4	4		Elective
4043	PB File	Terna	Hosp-5	Apr-19	Orthopaedics	Ortho	2019-02-04		LEFT TOTAL KNEE REPLACEMENT	Others | Non Essential		999	F		Regional Anesthesia: Spinal, Epidural and Regional Blocks	Non-Essential	Non-Essential	4	4		Elective
4044	PB File	Terna	Hosp-5	Apr-19	Orthopaedics	Ortho	2019-02-04		RIGHT HIP BIPOLAR HEMI REPLACEMENT HEMIARTHROPLASTY	Others | Non Essential		999	F		Regional Anesthesia: Spinal, Epidural and Regional Blocks	Non-Essential	Non-Essential	4	4		Elective
4045	PB File	Terna	Hosp-5	Apr-19	General Surgery	GenSx	2019-03-04		OGDSCOPY FOR PEPTIC ULCER	Others | Non Essential		999	F		Local anesthesia not supplemented by sedation or GA	Essential	Non-Essential	4	4		Elective
4046	PB File	Terna	Hosp-5	Apr-19	General Surgery	GenSx	2019-03-04		OGDSCOPY + COLONOSCOPY FOR MALENA	Others | Non Essential		999	M		General Anaesthesia	Essential	Non-Essential	1	3		Emergency
4047	PB File	Terna	Hosp-5	Apr-19	General Surgery	GenSx	2019-03-04		OGDSCOPY ACID PEPTIC DISEASE	Others | Non Essential		999	M		Local anesthesia not supplemented by sedation or GA	Essential	Non-Essential	4	4		Elective
4049	PB File	Terna	Hosp-5	Apr-19	General Surgery	GenSx	2019-03-04		RIGHT BUCCAL MUCOSA LESION BIOPSY	Others | Non Essential		999	M		Local anesthesia not supplemented by sedation or GA	Essential	Non-Essential	3	3		Elective
4050	PB File	Terna	Hosp-5	Apr-19	Obstetrics & Gynaecology	ObGy	2019-03-04		TAH WITH BSO	Others | Non Essential		999	F		Regional Anesthesia: Spinal, Epidural and Regional Blocks	Essential	Non-Essential	2	2		Elective
4051	PB File	Terna	Hosp-5	Apr-19	General Surgery	GenSx	2019-04-04		OGDSCOPY FOR FOLLOW UP UPPER GI BLEED	Others | Non Essential		999	M		Regional Anesthesia: Spinal, Epidural and Regional Blocks	Essential	Non-Essential	4	4		Elective
4053	PB File	Terna	Hosp-5	Apr-19	General Surgery	GenSx	2019-04-04		EXCISION OF CERVICAL LYMPHNODE BIOPSY LEFT NECK	Others | Non Essential		999	F		General Anaesthesia	Essential	Non-Essential	3	3		Elective
4054	PB File	Terna	Hosp-5	Apr-19	General Surgery	GenSx	2019-05-04		OGDSCOPY + COLONOSCOPY FOR ? MALENA/ HAEMATOCHEZIA	Others | Non Essential		999	M		General Anaesthesia	Essential	Non-Essential	1	3		Emergency
4055	PB File	Terna	Hosp-5	Apr-19	General Surgery	GenSx	2019-05-04		EXCISION OF GANGLION AT RIGHT WRIST	Others | Non Essential		999	M		General Anaesthesia	Non-Essential	Non-Essential	4	4		Elective
4056	PB File	Terna	Hosp-5	Apr-19	General Surgery	GenSx	2019-05-04		LARGE EXCISION LIPOMA ON LEFT SIDE CHEST WALL	Others | Non Essential		999	M		Regional Anesthesia: Spinal, Epidural and Regional Blocks	Non-Essential	Non-Essential	4	4		Elective
4058	PB File	Terna	Hosp-5	Apr-19	Orthopaedics	Ortho	2019-05-04		TENDON REPAIR RIGHT SIDE LOWER LIMB	Others | Non Essential		999	M		Regional Anesthesia: Spinal, Epidural and Regional Blocks	Essential	Non-Essential	1	1		Emergency
4059	PB File	Terna	Hosp-5	Apr-19	Obstetrics & Gynaecology	ObGy	2019-05-04		OS TIGHTENIG FOR THREATENED ABORTION	Others | Non Essential		999	F		Regional Anesthesia: Spinal, Epidural and Regional Blocks	Non-Essential	Non-Essential	1	1		Emergency
4060	PB File	Terna	Hosp-5	Apr-19	General Surgery	GenSx	2019-06-04		SUB TOTAL THYROIDECTOMY	Others | Non Essential		999	F		General Anaesthesia	Essential	Non-Essential	4	4		Elective
4061	PB File	Terna	Hosp-5	Apr-19	Orthopaedics	Ortho	2019-08-03		RIGHT BIPOLAR HEMIARTHROPLASTY	Others | Non Essential		999	F		Regional Anesthesia: Spinal, Epidural and Regional Blocks	Non-Essential	Non-Essential	4	4		Elective
4062	PB File	Terna	Hosp-5	Apr-19	General Surgery	GenSx	2019-08-04		OGD SCOPY + COLONOSCOPY WITH BIOPSY	Others | Non Essential		999	F		General Anaesthesia	Essential	Non-Essential	4	4		Elective
4063	PB File	Terna	Hosp-5	Apr-19	General Surgery	GenSx	2019-08-04		OGD SCOPY+BIOPSY, GASTRIC ULCER	Others | Non Essential		999	M		Local anesthesia not supplemented by sedation or GA	Essential	Non-Essential	3	3		Elective
4066	PB File	Terna	Hosp-5	Apr-19	Obstetrics & Gynaecology	ObGy	2019-08-04		HYSTEROSCOPY + POLYECTOMY	Others | Non Essential		999	F		Regional Anesthesia: Spinal, Epidural and Regional Blocks	Essential	Non-Essential	4	4		Elective
4067	PB File	Terna	Hosp-5	Apr-19	Orthopaedics	Ortho	2019-09-04		LEFT ANKLE ARTHRODESIS	Others | Non Essential		999	M		Regional Anesthesia: Spinal, Epidural and Regional Blocks	Non-Essential	Non-Essential	4	4		Elective
4069	PB File	Terna	Hosp-5	Apr-19	Obstetrics & Gynaecology	ObGy	2019-09-04		HYSTEROSCOPY + CERVICAL BIOPSY + CERVICAL POLYPECTOMY +	Others | Non Essential		999	F		General Anaesthesia	Essential	Non-Essential	4	4		Elective
4071	PB File	Terna	Hosp-5	Apr-19	General Surgery	GenSx	2019-09-04		DERMOID CYST EXCISION ON RIGHT THUMB	Others | Non Essential		999	F		Regional Anesthesia: Spinal, Epidural and Regional Blocks	Non-Essential	Non-Essential	4	4		Elective
4073	PB File	Terna	Hosp-5	Apr-19	General Surgery	GenSx	2019-10-04		FISTULECTOMY	Others | Non Essential		999	F		Regional Anesthesia: Spinal, Epidural and Regional Blocks	Non-Essential	Non-Essential	4	4		Elective
4075	PB File	Terna	Hosp-5	Apr-19	General Surgery	GenSx	2019-10-04		OGD SCOPY FOR GERD	Others | Non Essential		999	M		Local anesthesia not supplemented by sedation or GA	Essential	Non-Essential	4	4		Elective
4076	PB File	Terna	Hosp-5	Apr-19	Orthopaedics	Ortho	2019-10-04		BILATERAL TOTAL KNEE REPLACEMENT	Others | Non Essential		999	F		Regional Anesthesia: Spinal, Epidural and Regional Blocks	Non-Essential	Non-Essential	4	4		Elective
4077	PB File	Terna	Hosp-5	Apr-19	Orthopaedics	Ortho	2019-11-04		RIGHT DISTAL END RADIUS IMPLANT REMOVAL	Others | Non Essential		999	M		Regional Anesthesia: Spinal, Epidural and Regional Blocks	Essential	Non-Essential	4	4		Elective
4078	PB File	Terna	Hosp-5	Apr-19	General Surgery	GenSx	2019-11-04		MULTIPLE CORN EXCISION ON LEFT HEAL	Others | Non Essential		999	F		Local anesthesia not supplemented by sedation or GA	Non-Essential	Non-Essential	4	4		Elective
4079	PB File	Terna	Hosp-5	Apr-19	General Surgery	GenSx	2019-11-04		OGD SCOPY FOR CHRONIC APD	Others | Non Essential		999	F		General Anaesthesia	Essential	Non-Essential	4	4		Elective
4082	PB File	Terna	Hosp-5	Apr-19	General Surgery	GenSx	2019-11-04		HEMICOLECTOMY TO RIGHT FOR CA COLON	Others | Non Essential		999	M		General Anaesthesia	Essential	Non-Essential	3	3		Elective
4083	PB File	Terna	Hosp-5	Apr-19	Orthopaedics	Ortho	2019-11-04		BILATERAL TOTAL KNEE REPLACEMENT	Others | Non Essential		999	M		Regional Anesthesia: Spinal, Epidural and Regional Blocks	Non-Essential	Non-Essential	4	4		Elective
4084	PB File	Terna	Hosp-5	Apr-19	Orthopaedics	Ortho	2019-12-04		BONE GRAFTING AFTER IMPLANT REMOVAL	Others | Non Essential		999	F		Not available	Non-Essential	Non-Essential	4	4		Elective
4085	PB File	Terna	Hosp-5	Apr-19	General Surgery	GenSx	2019-12-04		CONOLOSCOPY WITH BIOPSY	Others | Non Essential		999	F		Regional Anesthesia: Spinal, Epidural and Regional Blocks	Essential	Non-Essential	3	3		Elective
4086	PB File	Terna	Hosp-5	Apr-19	General Surgery	GenSx	2019-12-04		OGD SCOPY FOR DYSPHAGIA	Others | Non Essential		999	F		Local anesthesia not supplemented by sedation or GA	Essential	Non-Essential	3	3		Elective
4090	PB File	Terna	Hosp-5	Apr-19	General Surgery	GenSx	2019-12-04		SKIN GRAFTING OF LEFT THIGH	Others | Non Essential		999	M		Regional Anesthesia: Spinal, Epidural and Regional Blocks	Essential	Non-Essential	4	4		Elective
4091	PB File	Terna	Hosp-5	Apr-19	General Surgery	GenSx	13/04/2019		OGD SCOPY WITH COLONOSCOPY WITH BIOPSY	Others | Non Essential		999	M		General Anaesthesia	Essential	Non-Essential	3	3		Elective
4093	PB File	Terna	Hosp-5	Apr-19	Obstetrics & Gynaecology	ObGy	15/04/2019		CERVICAL LYMPH NODE BIOPSY	Others | Non Essential		999	F		General Anaesthesia	Non-Essential	Non-Essential	4	4		Elective
4094	PB File	Terna	Hosp-5	Apr-19	General Surgery	GenSx	15/04/2019		OGD SCOPY FOR DYSPHAGIA	Others | Non Essential		999	F		Local anesthesia not supplemented by sedation or GA	Essential	Non-Essential	3	3		Elective
4097	PB File	Terna	Hosp-5	Apr-19	Orthopaedics	Ortho	15/04/2019		RIGHT TOTAL KNEE REPLACEMENT	Others | Non Essential		999	F		Regional Anesthesia: Spinal, Epidural and Regional Blocks	Non-Essential	Non-Essential	4	4		Elective
4098	PB File	Terna	Hosp-5	Apr-19	General Surgery	GenSx	15/04/2019		LEFT LOWER LIMB PERFORATOR LIGATION	Others | Non Essential		999	F		Regional Anesthesia: Spinal, Epidural and Regional Blocks	Non-Essential	Non-Essential	4	4		Elective
4099	PB File	Terna	Hosp-5	Apr-19	Orthopaedics	Ortho	16/04/2019		LEFT TOTAL KNEE REPLACEMENT	Others | Non Essential		999	F		Regional Anesthesia: Spinal, Epidural and Regional Blocks	Non-Essential	Non-Essential	4	4		Elective
4103	PB File	Terna	Hosp-5	Apr-19	General Surgery	GenSx	17/04/2019		OGD SCOPY FOR UPPER GI BLEED	Others | Non Essential		999	M		Local anesthesia not supplemented by sedation or GA	Essential	Non-Essential	1	1		Emergency
4104	PB File	Terna	Hosp-5	Apr-19	General Surgery	GenSx	17/04/2019		OGD SCOPY FOR PEPTIC ULCER	Others | Non Essential		999	M		Regional Anesthesia: Spinal, Epidural and Regional Blocks	Essential	Non-Essential	4	4		Elective
4105	PB File	Terna	Hosp-5	Apr-19	General Surgery	GenSx	17/04/2019		OGD SCOPY WITH BIOPSY	Others | Non Essential		999	M		Regional Anesthesia: Spinal, Epidural and Regional Blocks	Essential	Non-Essential	3	3		Elective
4106	PB File	Terna	Hosp-5	Apr-19	Obstetrics & Gynaecology	ObGy	17/04/2019		VH WITH AP REPAIR	Others | Non Essential		999	F		General Anaesthesia	Essential	Non-Essential	4	4		Elective
4107	PB File	Terna	Hosp-5	Apr-19	Orthopaedics	Ortho	18/09/2019		SPINAL FUSION WITH DECOMPRESSION AT L4 - L5	Others | Non Essential		999	F		General Anaesthesia	Essential	Non-Essential	4	4		Elective
4110	PB File	Terna	Hosp-5	Apr-19	Orthopaedics	Ortho	20/04/2019		LEFT ANKLE ARTHRODESIS WITH S S NAIL + BONE GRAFTING	Others | Non Essential		999	M		Regional Anesthesia: Spinal, Epidural and Regional Blocks	Non-Essential	Non-Essential	4	4		Elective
4111	PB File	Terna	Hosp-5	Apr-19	Orthopaedics	Ortho	20/04/2019		L2 - L3 DECOMPRESSION DISSECTOMY / L4 - L5 DECOMPRESSION	Others | Non Essential		999	M		General Anaesthesia	Essential	Non-Essential	4	4		Elective
4113	PB File	Terna	Hosp-5	Apr-19	General Surgery	GenSx	22/04/2019		OGD SCOPY WITH ULCER BIOPSY	Others | Non Essential		999	M		Local anesthesia not supplemented by sedation or GA	Essential	Non-Essential	3	3		Elective
4115	PB File	Terna	Hosp-5	Apr-19	Orthopaedics	Ortho	23/04/2019		RIGHT KNEE INTRA ARTICULAR SYNVISE INJECTION	Others | Non Essential		999	M		Local anesthesia not supplemented by sedation or GA	Non-Essential	Non-Essential	4	4		Elective
4116	PB File	Terna	Hosp-5	Apr-19	Orthopaedics	Ortho	23/04/2019		B/L ASPIRATION & INTRA ARTCULAR INJECTION	Others | Non Essential		999	F		Local anesthesia not supplemented by sedation or GA	Non-Essential	Non-Essential	4	4		Elective
4117	PB File	Terna	Hosp-5	Apr-19	General Surgery	GenSx	23/04/2019		LEFT SACROCOCCYGEAL LIPOMA	Others | Non Essential		999	F		Regional Anesthesia: Spinal, Epidural and Regional Blocks	Non-Essential	Non-Essential	4	4		Elective
4118	PB File	Terna	Hosp-5	Apr-19	General Surgery	GenSx	23/04/2019		RIGHT THORACOTOMY WITH ESOPHAGAL ATERESIA REPAIR	Others | Non Essential		999	M		General Anaesthesia	Non-Essential	Non-Essential	1	1		Emergency
4121	PB File	Terna	Hosp-5	Apr-19	General Surgery	GenSx	25/04/2019		OGD SCOPY WITH BIOPSY OESOPHAGEAL GROWTH	Others | Non Essential		999	F		Local anesthesia not supplemented by sedation or GA	Essential	Non-Essential	3	3		Elective
4122	PB File	Terna	Hosp-5	Apr-19	Orthopaedics	Ortho	25/04/2019		LEFT TOTAL HIP REPLACEMENT	Others | Non Essential		999	M		Regional Anesthesia: Spinal, Epidural and Regional Blocks	Non-Essential	Non-Essential	4	4		Elective
4123	PB File	Terna	Hosp-5	Apr-19	Orthopaedics	Ortho	25/04/2019		RIGHT TOTAL KNEE RPLACEMENT	Others | Non Essential		999	F		Regional Anesthesia: Spinal, Epidural and Regional Blocks	Non-Essential	Non-Essential	4	4		Elective
4124	PB File	Terna	Hosp-5	Apr-19	General Surgery	GenSx	25/04/2019		EPIDERMOID CYST EXCISION ON LEFT LEG	Others | Non Essential		999	F		Local anesthesia not supplemented by sedation or GA	Non-Essential	Non-Essential	4	4		Elective
4126	PB File	Terna	Hosp-5	Apr-19	General Surgery	GenSx	26/04/2019		EXCISION OF SCALP LIPOMA	Others | Non Essential		999	M		Local anesthesia not supplemented by sedation or GA	Essential	Non-Essential	4	4		Elective
4127	PB File	Terna	Hosp-5	Apr-19	General Surgery	GenSx	27/04/2019		OGD SCOPY WITH BIOPSY	Others | Non Essential		999	M		Regional Anesthesia: Spinal, Epidural and Regional Blocks	Essential	Non-Essential	3	3		Elective
4129	PB File	Terna	Hosp-5	Apr-19	Orthopaedics	Ortho	27/04/2019		RIGHT HIP CEMENTED BIPOLAR	Others | Non Essential		999	M		General Anaesthesia	Non-Essential	Non-Essential	4	4		Elective
4130	PB File	Terna	Hosp-5	Apr-19	General Surgery	GenSx	27/04/2019		EXCISION OF STITCH GRANULOMA ON ABDOMEN	Others | Non Essential		999	F		Local anesthesia not supplemented by sedation or GA	Essential	Non-Essential	4	4		Elective
4132	PB File	Terna	Hosp-5	Apr-19	General Surgery	GenSx	29/04/2019		EXCISION OF LUMP OF RIGHT INTRACLAVICULAR SWELLING	Others | Non Essential		999	M		Regional Anesthesia: Spinal, Epidural and Regional Blocks	Essential	Non-Essential	3	3		Elective
4133	PB File	Terna	Hosp-5	Apr-19	General Surgery	GenSx	29/04/2019		LEFT HEMITHYROIDECTOMY	Others | Non Essential		999	F		General Anaesthesia	Non-Essential	Non-Essential	4	4		Elective
4134	PB File	Terna	Hosp-5	Apr-19	General Surgery	GenSx	29/04/2019		OGDSCOPY FOR F/U OF DUODENAL ULCER	Others | Non Essential		999	M		General Anaesthesia	Essential	Non-Essential	3	3		Elective
4135	PB File	Terna	Hosp-5	Apr-19	Obstetrics & Gynaecology	ObGy	29/04/2019		CERVICAL BIOPSY FOR ? CA CERVIX	Others | Non Essential		999	F		General Anaesthesia	Essential	Non-Essential	4	4		Elective
4136	PB File	Terna	Hosp-5	Apr-19	Orthopaedics	Ortho	30/04/2019		BILATERAL HIGH CONDLEYECTOMY WITH RIGHT & LEFT TMJ AND interpositional Dermis Grafting	Others | Non Essential		999	M		General Anaesthesia	Essential	Non-Essential	4	4		Elective
4137	PB File	Terna	Hosp-5	Apr-19	Orthopaedics	Ortho	30/04/2019		LEFT HIP IMPLANT REMOVAL	Others | Non Essential		999	M		Regional Anesthesia: Spinal, Epidural and Regional Blocks	Non-Essential	Non-Essential	4	4		Elective
4138	PB File	Terna	Hosp-5	Apr-19	General Surgery	GenSx	30/04/2019		TOTAL THYROIDECTOMY FOR THYROID MALIGNANCY	Others | Non Essential		999	F		General Anaesthesia	Essential	Non-Essential	2	2		Elective
4139	PB File	Terna	Hosp-5	Apr-19	General Surgery	GenSx	30/04/2019		LEFT NEPHRECTOMY FOR RCC	Others | Non Essential		999	M		General Anaesthesia	Non-Essential	Non-Essential	2	2		Elective
4140	PB File	Terna	Hosp-5	Apr-19	Orthopaedics	Ortho	30/04/2019		BILATERAL TOTAL KNEE REPLACEMENT	Others | Non Essential		999	F		Regional Anesthesia: Spinal, Epidural and Regional Blocks	Non-Essential	Non-Essential	4	4		Elective
4141	PB File	Terna	Hosp-5	Apr-19	General Surgery	GenSx	30/4/2019		EXCISION OF PAPILOMA ON RIGHT KNEE	Others | Non Essential		999	F		Local anesthesia not supplemented by sedation or GA	Essential	Non-Essential	4	4		Elective
4155	PB File	KEM	Hosp-2	Apr-19	Orthopedics	Ortho	2019-04-29		EUA sis lateral sphineteroctomy	Others | Non Essential		49	F		Regional Anesthesia: Spinal, Epidural and Regional Blocks	Non-Essential	Non-Essential	Could Not Be Assigned	Could Not Be Assigned		elective
4156	PB File	KEM	Hosp-2	Apr-19	Orthopedics	Ortho	2019-04-29		Rt leg TMT SOS amputed	amputation		75	F		Regional Anesthesia: Spinal, Epidural and Regional Blocks	Non-Essential	Non-Essential	1	1		emergency
4157	PB File	KEM	Hosp-2	Apr-19	Orthopedics	Ortho	2019-04-29		Rt Leg TMT amputed	amputation		71	M		Regional Anesthesia: Spinal, Epidural and Regional Blocks	Non-Essential	Non-Essential	1	1		emergency
4169	PB File	KEM	Hosp-2	Apr-19	General Surgery	GenSx	2019-04-01		FEC i/v/o IBD	Others | Non Essential		55	M		General Anaesthesia	Non-Essential	Non-Essential	Could Not Be Assigned	Could Not Be Assigned		emergency
4171	PB File	KEM	Hosp-2	Apr-19	Orthopedics	Ortho	2019-04-02		AKA of rt LL	amputation		60	M		Regional Anesthesia: Spinal, Epidural and Regional Blocks	Non-Essential	Non-Essential	1	1		emergency
4172	PB File	KEM	Hosp-2	Apr-19	General Surgery	GenSx	2019-04-04		Left UL embdectomy	Others | Non Essential		42	M		General Anaesthesia	Non-Essential	Non-Essential	Could Not Be Assigned	Could Not Be Assigned		emergency
4173	PB File	KEM	Hosp-2	Apr-19	General Surgery	GenSx	2019-04-05		Rt neck carotid artery exploration with repairing i/v/ o trauma k/c/o CA tongue	Others | Non Essential		67	F		General Anaesthesia	Non-Essential	Non-Essential	Could Not Be Assigned	Could Not Be Assigned		emergency
4174	PB File	KEM	Hosp-2	Apr-19	General Surgery	GenSx	2019-04-06		Sinus tract of excision	Others | Non Essential		48	M		Local anesthesia not supplemented by sedation or GA	Non-Essential	Non-Essential	Could Not Be Assigned	Could Not Be Assigned		emergency
4175	PB File	KEM	Hosp-2	Apr-19	Orthopedics	Ortho	2019-04-07		RT LL BKA	amputation		60	M		Regional Anesthesia: Spinal, Epidural and Regional Blocks	Non-Essential	Non-Essential	1	1		emergency
4176	PB File	KEM	Hosp-2	Apr-19	Orthopedics	Ortho	2019-04-07		Rt LL TMT amputation (SOS)	amputation		55	M		Regional Anesthesia: Spinal, Epidural and Regional Blocks	Non-Essential	Non-Essential	1	1		emergency
4177	PB File	KEM	Hosp-2	Apr-19	Orthopedics	Ortho	2019-04-07		Rt LL BKA	amputation		55	M		Regional Anesthesia: Spinal, Epidural and Regional Blocks	Non-Essential	Non-Essential	1	1		emergency
4178	PB File	KEM	Hosp-2	Apr-19	General Surgery	GenSx	2019-04-07		Ksharsutra placement	Others | Non Essential		40	M		Local anesthesia not supplemented by sedation or GA	Non-Essential	Non-Essential	4	4		elective
4179	PB File	KEM	Hosp-2	Apr-19	General Surgery	GenSx	2019-04-08		Emg removal of embolectomy of left LXXXXXX	Others | Non Essential		40	M		General Anaesthesia	Non-Essential	Non-Essential	Could Not Be Assigned	Could Not Be Assigned		emergency
4180	PB File	KEM	Hosp-2	Apr-19	Orthopedics	Ortho	2019-04-08		Rt LL AKA SOS XXXXXXXXXXXX	amputation		60	M		General Anaesthesia	Non-Essential	Non-Essential	1	1		emergency
4181	PB File	KEM	Hosp-2	Apr-19	General Surgery	GenSx	2019-04-08		Excision of Infected sebascious cyst	Others | Non Essential		42	M		Regional Anesthesia: Spinal, Epidural and Regional Blocks	Non-Essential	Non-Essential	1	1		Emergency
4182	PB File	KEM	Hosp-2	Apr-19	Orthopedics	Ortho	2019-04-09		TMT	amputation		53	M		Regional Anesthesia: Spinal, Epidural and Regional Blocks	Non-Essential	Non-Essential	1	1		emergency
4183	PB File	KEM	Hosp-2	Apr-19	General Surgery	GenSx	2019-04-09		Pile Binding	Others | Non Essential		23	M		Not available	Non-Essential	Non-Essential	4	4		elective
4184	PB File	KEM	Hosp-2	Apr-19	General Surgery	GenSx	2019-04-09		Pile Binding	Others | Non Essential		40	M		Not available	Non-Essential	Non-Essential	4	4		elective
4185	PB File	KEM	Hosp-2	Apr-19	General Surgery	GenSx	2019-04-10		Excision infected sebaceous cyst	Others | Non Essential		52	F		Local anesthesia not supplemented by sedation or GA	Non-Essential	Non-Essential	1	1		Emergency
4186	PB File	KEM	Hosp-2	Apr-19	General Surgery	GenSx	2019-04-11		Ksharsutra replace	Others | Non Essential		50	F		Regional Anesthesia: Spinal, Epidural and Regional Blocks	Non-Essential	Non-Essential	4	4		elective
4187	PB File	KEM	Hosp-2	Apr-19	General Surgery	GenSx	2019-04-11		Pilonial sinus inscision	Others | Non Essential		35	M		Regional Anesthesia: Spinal, Epidural and Regional Blocks	Non-Essential	Non-Essential	4	4		elective
4188	PB File	KEM	Hosp-2	Apr-19	General Surgery	GenSx	2019-04-12		Pile Binding	Others | Non Essential		80	M		Not available	Non-Essential	Non-Essential	4	4		elective
4189	PB File	KEM	Hosp-2	Apr-19	Orthopedics	Ortho	2019-04-16		Rays of left great toe SOS XXXX	amputation		50	M		Local anesthesia not supplemented by sedation or GA	Non-Essential	Non-Essential	1	1		emergency
4190	PB File	KEM	Hosp-2	Apr-19	General Surgery	GenSx	2019-04-17		Pile Binding	Others | Non Essential		36	M		Local anesthesia not supplemented by sedation or GA	Non-Essential	Non-Essential	4	4		elective
4192	PB File	KEM	Hosp-2	Apr-19	General Surgery	GenSx	2019-04-17		Rectal biopsy	Others | Non Essential		55	F		Not available	Non-Essential	Non-Essential	4	4		elective
4193	PB File	KEM	Hosp-2	Apr-19	General Surgery	GenSx	2019-04-18		Fistulectomy	Others | Non Essential		69	M		Regional Anesthesia: Spinal, Epidural and Regional Blocks	Non-Essential	Non-Essential	4	4		elective
4194	PB File	KEM	Hosp-2	Apr-19	General Surgery	GenSx	2019-04-18		Rectal biopsy	Others | Non Essential		89	M		Local anesthesia not supplemented by sedation or GA	Non-Essential	Non-Essential	4	4		elective
4195	PB File	KEM	Hosp-2	Apr-19	General Surgery	GenSx	2019-04-18		Rectal biopsy	Others | Non Essential		65	M		Local anesthesia not supplemented by sedation or GA	Non-Essential	Non-Essential	4	4		elective
4196	PB File	KEM	Hosp-2	Apr-19	General Surgery	GenSx	2019-04-19		Pile Binding	Others | Non Essential		28	M		Not available	Non-Essential	Non-Essential	4	4		elective
4197	PB File	KEM	Hosp-2	Apr-19	General Surgery	GenSx	2019-04-19		Pile Binding	Others | Non Essential		45	M		Not available	Non-Essential	Non-Essential	4	4		Elective
4199	PB File	KEM	Hosp-2	Apr-19	General Surgery	GenSx	2019-04-22		Rt Foot fasciotomy	Others | Non Essential		74	M		Regional Anesthesia: Spinal, Epidural and Regional Blocks	Non-Essential	Non-Essential	1	1		emergency
4200	PB File	KEM	Hosp-2	Apr-19	General Surgery	GenSx	2019-04-22		Fistulectomy	Others | Non Essential		49	M		Regional Anesthesia: Spinal, Epidural and Regional Blocks	Non-Essential	Non-Essential	4	4		elective
4201	PB File	KEM	Hosp-2	Apr-19	Orthopedics	Ortho	2019-04-23		Rt Foot rt great toe amputation	amputation		62	M		Regional Anesthesia: Spinal, Epidural and Regional Blocks	Non-Essential	Non-Essential	1	1		emergency
4203	PB File	KEM	Hosp-2	Apr-19	Orthopedics	Ortho	2019-04-23		Disartification of hip left side	Others | Non Essential		58	F		General Anaesthesia	Non-Essential	Non-Essential	Could Not Be Assigned	Could Not Be Assigned		emergency
4204	PB File	KEM	Hosp-2	Apr-19	General Surgery	GenSx	2019-04-24		B/L Diversion sigmoid ostomy	Others | Non Essential		38	M		General Anaesthesia	Non-Essential	Non-Essential	4	4		elective
4205	PB File	KEM	Hosp-2	Apr-19	General Surgery	GenSx	2019-04-25		Pile Binding	Others | Non Essential		85	M		Not available	Non-Essential	Non-Essential	4	4		elective
4206	PB File	KEM	Hosp-2	Apr-19	General Surgery	GenSx	2019-04-25		Abd wash via infant feeding tube	Others | Non Essential		28	M		Local anesthesia not supplemented by sedation or GA	Non-Essential	Non-Essential	Could Not Be Assigned	Could Not Be Assigned		emergency
4208	PB File	KEM	Hosp-2	Apr-19	General Surgery	GenSx	2019-04-25		PR examination under anasthesia	Others | Non Essential		32	M		Regional Anesthesia: Spinal, Epidural and Regional Blocks	Non-Essential	Non-Essential	4	4		elective
4209	PB File	KEM	Hosp-2	Apr-19	General Surgery	GenSx	2019-04-25		Rt foot TMT	amputation		67	M		Local anesthesia not supplemented by sedation or GA	Non-Essential	Non-Essential	1	1		emergency
4210	PB File	KEM	Hosp-2	Apr-19	General Surgery	GenSx	2019-04-25		CXXX suturing	Others | Non Essential		52	M		Local anesthesia not supplemented by sedation or GA	Non-Essential	Non-Essential	4	4		elective
4211	PB File	KEM	Hosp-2	Apr-19	General Surgery	GenSx	2019-04-25		Fistulectomy suture removal	Others | Non Essential		48	F		Regional Anesthesia: Spinal, Epidural and Regional Blocks	Non-Essential	Non-Essential	4	4		elective
4212	PB File	KEM	Hosp-2	Apr-19	General Surgery	GenSx	2019-04-25		Stoma Wash	Others | Non Essential		28	M		Local anesthesia not supplemented by sedation or GA	Non-Essential	Non-Essential	4	4		elective
4213	PB File	KEM	Hosp-2	Apr-19	Orthopedics	Ortho	2019-04-26		Rt Leg Tibia bone mXXXX	Others | Non Essential		15	M		Regional Anesthesia: Spinal, Epidural and Regional Blocks	Non-Essential	Non-Essential	4	4		elective
4214	PB File	KEM	Hosp-2	Apr-19	General Surgery	GenSx	2019-04-26		Secondary suturing cholecystomy surgical wound	Others | Non Essential		35	M		Local anesthesia not supplemented by sedation or GA	Non-Essential	Non-Essential	4	4		elective
4215	PB File	KEM	Hosp-2	Apr-19	General Surgery	GenSx	2019-04-26		Rt foot foreign body removal	Others | Non Essential		47	M		Local anesthesia not supplemented by sedation or GA	Non-Essential	Non-Essential	1	1		emergency
4216	PB File	KEM	Hosp-2	Apr-19	General Surgery	GenSx	2019-04-26		Rt foot foreign body removal	Others | Non Essential		24	M		Local anesthesia not supplemented by sedation or GA	Non-Essential	Non-Essential	1	1		Elective
4217	PB File	KEM	Hosp-2	Apr-19	Orthopedics	Ortho	2019-04-26		Secondary suturing AKA	Others | Non Essential		36	M		Local anesthesia not supplemented by sedation or GA	Non-Essential	Non-Essential	4	4		elective
4218	PB File	KEM	Hosp-2	Apr-19	General Surgery	GenSx	2019-04-27		Sphintrectomy with XXXXXXXX	Others | Non Essential		50	M		Regional Anesthesia: Spinal, Epidural and Regional Blocks	Non-Essential	Non-Essential	4	4		elective
4219	PB File	KEM	Hosp-2	Apr-19	General Surgery	GenSx	2019-04-27		Aspiration of inguinal collection	Others | Non Essential		52	M		Local anesthesia not supplemented by sedation or GA	Non-Essential	Non-Essential	4	4		elective
4220	PB File	KEM	Hosp-2	Apr-19	General Surgery	GenSx	2019-04-27		Excision of left side neck infected XXX	abscess Drainage		27	M		Local anesthesia not supplemented by sedation or GA	Essential	Essential	1	1		emergency
4221	PB File	KEM	Hosp-2	Apr-19	General Surgery	GenSx	2019-04-28		Fistulagram	Others | Non Essential		44	M		Regional Anesthesia: Spinal, Epidural and Regional Blocks	Non-Essential	Non-Essential	4	4		elective
4222	PB File	KEM	Hosp-2	Apr-19	General Surgery	GenSx	2019-04-28		Stoma closure	Others | Non Essential		52	M		Regional Anesthesia: Spinal, Epidural and Regional Blocks	Non-Essential	Non-Essential	4	4		elective
4223	PB File	KEM	Hosp-2	Apr-19	General Surgery	GenSx	2019-04-29		EVA sis lateral sphineteroctomy	Others | Non Essential		49	F		Regional Anesthesia: Spinal, Epidural and Regional Blocks	Non-Essential	Non-Essential	4	4		elective
4224	PB File	KEM	Hosp-2	Apr-19	Orthopedics	Ortho	2019-04-29		Rt Leg TMT	Others | Non Essential		75	F		Regional Anesthesia: Spinal, Epidural and Regional Blocks	Non-Essential	Non-Essential	4	4		elective
4225	PB File	KEM	Hosp-2	Apr-19	General Surgery	GenSx	2019-05-01		Feeding Jejunum	Others | Non Essential		24	M		Regional Anesthesia: Spinal, Epidural and Regional Blocks	Non-Essential	Non-Essential	1	1		emergency
4226	PB File	KEM	Hosp-2	Apr-19	General Surgery	GenSx	2019-04-29		Lap SOS open hemicolectomy	Others | Non Essential		74	999		General Anaesthesia	Non-Essential	Non-Essential	4	4		elective
4227	PB File	KEM	Hosp-2	Apr-19	Gynac	ObGy	2019-04-30		Excision of Gynaeceomastia	Others | Non Essential		24	F		General Anaesthesia	Non-Essential	Non-Essential	4	4		elective
4228	PB File	KEM	Hosp-2	Apr-19	General Surgery	GenSx	2019-04-30		Left breast MRM	Others | Non Essential		61	F		General Anaesthesia	Non-Essential	Non-Essential	2	2		elective
4229	PB File	KEM	Hosp-2	Apr-19	General Surgery	GenSx	2019-04-30		Total Thyroidectomy	Others | Non Essential		35	F		General Anaesthesia	Non-Essential	Non-Essential	2	2		elective
4230	PB File	KEM	Hosp-2	Apr-19	General Surgery	GenSx	2019-04-29		Rt shoulderlipoma excisison	Others | Non Essential		35	999		General Anaesthesia	Non-Essential	Non-Essential	4	4		elective
4231	PB File	KEM	Hosp-2	Apr-19	General Surgery	GenSx	2019-04-29		Stoma Closure	Others | Non Essential		28	M		Regional Anesthesia: Spinal, Epidural and Regional Blocks	Non-Essential	Non-Essential	4	4		elective
4232	PB File	KEM	Hosp-2	Apr-19	General Surgery	GenSx	2019-04-29		Secondary suturing of midline	Others | Non Essential		55	F		Local anesthesia not supplemented by sedation or GA	Non-Essential	Non-Essential	4	4		elective
4233	PB File	KEM	Hosp-2	Apr-19	General Surgery	GenSx	2019-04-27		Open LPJ	Others | Non Essential		30	999		General Anaesthesia	Non-Essential	Non-Essential	4	4		elective
4234	PB File	KEM	Hosp-2	Apr-19	General Surgery	GenSx	2019-04-27		Left breast lumpm excisio	Others | Non Essential		52	F		Local anesthesia not supplemented by sedation or GA	Non-Essential	Non-Essential	4	4		elective
4235	PB File	KEM	Hosp-2	Apr-19	General Surgery	GenSx	2019-04-27		Lap SOS open colecystectomy	Others | Non Essential		35	F		Not available	Essential	Non-Essential	4	4		elective
4236	PB File	KEM	Hosp-2	Apr-19	General Surgery	GenSx	2019-04-27		B/L subcutaneous Mestectectomy	Others | Non Essential		28	999		General Anaesthesia	Non-Essential	Non-Essential	4	4		elective
4237	PB File	KEM	Hosp-2	Apr-19	General Surgery	GenSx	2019-04-27		Excising rt axillary lipoma	Others | Non Essential		35	F		General Anaesthesia	Non-Essential	Non-Essential	4	4		elective
4238	PB File	KEM	Hosp-2	Apr-19	General Surgery	GenSx	2019-04-27		Excision of rt gluteal Liporna	Others | Non Essential		54	999		General Anaesthesia	Non-Essential	Non-Essential	4	4		elective
4239	PB File	KEM	Hosp-2	Apr-19	General Surgery	GenSx	2019-04-23		Lap SOS open Adrenalectomy	Others | Non Essential		19	F		General Anaesthesia	Non-Essential	Non-Essential	4	4		elective
4240	PB File	KEM	Hosp-2	Apr-19	General Surgery	GenSx	2019-04-23		Open B/L hydrocolic Rt Inguinal herna	Others | Non Essential		50	999		Regional Anesthesia: Spinal, Epidural and Regional Blocks	Non-Essential	Non-Essential	4	4		elective
4241	PB File	KEM	Hosp-2	Apr-19	General Surgery	GenSx	2019-04-15		Open right Inguinal repair with meshplasty	Others | Non Essential		20	999		Regional Anesthesia: Spinal, Epidural and Regional Blocks	Essential	Non-Essential	4	4		elective
4242	PB File	KEM	Hosp-2	Apr-19	General Surgery	GenSx	2019-04-15		Sebaceous cyst excisison	Others | Non Essential		27	999		Local anesthesia not supplemented by sedation or GA	Non-Essential	Non-Essential	4	4		elective
4243	PB File	KEM	Hosp-2	Apr-19	General Surgery	GenSx	2019-04-15		Excisional sebaceous cyst left scrotum	Others | Non Essential		45	999		Local anesthesia not supplemented by sedation or GA	Non-Essential	Non-Essential	4	4		elective
4244	PB File	KEM	Hosp-2	Apr-19	General Surgery	GenSx	2019-04-15		Back Lipoma Excision	Others | Non Essential		55	999		General Anaesthesia	Non-Essential	Non-Essential	4	4		elective
4245	PB File	KEM	Hosp-2	Apr-19	General Surgery	GenSx	2019-04-15		Polypoidal mass of neck	Others | Non Essential		75	999		Local anesthesia not supplemented by sedation or GA	Non-Essential	Non-Essential	4	4		elective
4246	PB File	KEM	Hosp-2	Apr-19	General Surgery	GenSx	2019-04-15		Lap Fundouplication	Others | Non Essential		36	999		General Anaesthesia	Non-Essential	Non-Essential	4	4		elective
4247	PB File	KEM	Hosp-2	Apr-19	General Surgery	GenSx	2019-04-15		Left fibroodomona	Others | Non Essential		17	F		Local anesthesia not supplemented by sedation or GA	Non-Essential	Non-Essential	4	4		elective
4248	PB File	KEM	Hosp-2	Apr-19	General Surgery	GenSx	2019-04-15		Neck Lipoma excision	Others | Non Essential		66	F		Local anesthesia not supplemented by sedation or GA	Non-Essential	Non-Essential	4	4		elective
4249	PB File	KEM	Hosp-2	Apr-19	General Surgery	GenSx	2019-04-24		Pancreatic Necrosectomy	Others | Non Essential		32	999		General Anaesthesia	Non-Essential	Non-Essential	4	4		elective
4250	PB File	KEM	Hosp-2	Apr-19	General Surgery	GenSx	2019-04-24		Rt forearm ganglion cyst excision	Others | Non Essential		17	999		Local anesthesia not supplemented by sedation or GA	Non-Essential	Non-Essential	4	4		elective
4251	PB File	KEM	Hosp-2	Apr-19	General Surgery	GenSx	2019-04-24		Hemorriodectomy	Others | Non Essential		65	999		Regional Anesthesia: Spinal, Epidural and Regional Blocks	Non-Essential	Non-Essential	4	4		elective
4252	PB File	KEM	Hosp-2	Apr-19	General Surgery	GenSx	2019-04-17		Left modified radical mastectomy	Others | Non Essential		68	F		General Anaesthesia	Non-Essential	Non-Essential	2	2		elective
4253	PB File	KEM	Hosp-2	Apr-19	General Surgery	GenSx	2019-04-17		Perianal Fistulectomy	Others | Non Essential		35	999		Regional Anesthesia: Spinal, Epidural and Regional Blocks	Non-Essential	Non-Essential	4	4		elective
4254	PB File	KEM	Hosp-2	Apr-19	General Surgery	GenSx	2019-04-22		Supraclavicular lipoma excision	Others | Non Essential		30	999		Local anesthesia not supplemented by sedation or GA	Non-Essential	Non-Essential	4	4		elective
4255	PB File	KEM	Hosp-2	Apr-19	General Surgery	GenSx	2019-04-22		Pilonidal Sinus excision	Others | Non Essential		24	999		Regional Anesthesia: Spinal, Epidural and Regional Blocks	Non-Essential	Non-Essential	4	4		elective
4256	PB File	KEM	Hosp-2	Apr-19	General Surgery	GenSx	2019-04-22		Total Thyroidectomy	Others | Non Essential		70	F		General Anaesthesia	Non-Essential	Non-Essential	2	2		elective
4257	PB File	KEM	Hosp-2	Apr-19	General Surgery	GenSx	2019-04-22		Left breast Fibroadenoma	Others | Non Essential		24	F		Local anesthesia not supplemented by sedation or GA	Non-Essential	Non-Essential	4	4		elective
4258	PB File	KEM	Hosp-2	Apr-19	General Surgery	GenSx	2019-04-10		TEP with meshplasty	Others | Non Essential		23	999		General Anaesthesia	Essential	Non-Essential	4	4		elective
4259	PB File	KEM	Hosp-2	Apr-19	General Surgery	GenSx	2019-04-10		Stoma closure	Others | Non Essential		55	F		General Anaesthesia	Non-Essential	Non-Essential	4	4		elective
4260	PB File	KEM	Hosp-2	Apr-19	General Surgery	GenSx	2019-04-04		Lap SOS Open left ovarian cys excision	Others | Non Essential		21	F		General Anaesthesia	Non-Essential	Non-Essential	4	4		elective
4261	PB File	KEM	Hosp-2	Apr-19	General Surgery	GenSx	2019-04-01		Stapler hemrrhoidectomy	Others | Non Essential		70	999		Regional Anesthesia: Spinal, Epidural and Regional Blocks	Non-Essential	Non-Essential	4	4		elective
4262	PB File	KEM	Hosp-2	Apr-19	General Surgery	GenSx	2019-04-01		Total Thyroidectomy	Others | Non Essential		48	F		General Anaesthesia	Non-Essential	Non-Essential	2	2		elective
4263	PB File	KEM	Hosp-2	Apr-19	General Surgery	GenSx	2019-04-01		Lap Gastric pull up converted to Open	Others | Non Essential		48	999		General Anaesthesia	Non-Essential	Non-Essential	4	4		elective
4264	PB File	KEM	Hosp-2	Apr-19	General Surgery	GenSx	2019-04-18		Lap rectopexy	Others | Non Essential		40	F		General Anaesthesia	Non-Essential	Non-Essential	4	4		elective
4265	PB File	KEM	Hosp-2	Apr-19	General Surgery	GenSx	2019-04-18		Rt Breast MRM	Others | Non Essential		55	F		General Anaesthesia	Non-Essential	Non-Essential	4	4		elective
4266	PB File	KEM	Hosp-2	Apr-19	General Surgery	GenSx	2019-04-18		Gastro Jejunostomy with vagotomy	Others | Non Essential		70	999		General Anaesthesia	Non-Essential	Non-Essential	4	4		elective
4267	PB File	KEM	Hosp-2	Apr-19	General Surgery	GenSx	2019-04-18		Rt neck lymph node	Others | Non Essential		25	F		Local anesthesia not supplemented by sedation or GA	Non-Essential	Non-Essential	4	4		elective
4268	PB File	KEM	Hosp-2	Apr-19	General Surgery	GenSx	2019-04-18		Left gluteal epidarmoid cyst	Others | Non Essential		57	999		Regional Anesthesia: Spinal, Epidural and Regional Blocks	Non-Essential	Non-Essential	4	4		elective
4269	PB File	KEM	Hosp-2	Apr-19	General Surgery	GenSx	2019-04-18		Stoma closure	Others | Non Essential		35	999		Regional Anesthesia: Spinal, Epidural and Regional Blocks	Non-Essential	Non-Essential	4	4		elective
4270	PB File	KEM	Hosp-2	Apr-19	General Surgery	GenSx	2019-04-16		Scola	Others | Non Essential		50	F		General Anaesthesia	Non-Essential	Non-Essential	4	4		elective
4271	PB File	KEM	Hosp-2	Apr-19	General Surgery	GenSx	2019-04-16		Tep repair of RIH	Others | Non Essential		40	999		General Anaesthesia	Essential	Non-Essential	4	4		elective
4272	PB File	KEM	Hosp-2	Apr-19	General Surgery	GenSx	2019-04-16		TEP /TAPP	Others | Non Essential		33	999		General Anaesthesia	Non-Essential	Non-Essential	4	4		elective
4273	PB File	KEM	Hosp-2	Apr-19	General Surgery	GenSx	2019-04-16		Fistulectomy	Others | Non Essential		17	999		Regional Anesthesia: Spinal, Epidural and Regional Blocks	Non-Essential	Non-Essential	4	4		elective
4274	PB File	KEM	Hosp-2	Apr-19	General Surgery	GenSx	2019-04-22		Neck Lipoma	Others | Non Essential		54	F		Local anesthesia not supplemented by sedation or GA	Non-Essential	Non-Essential	4	4		Elective
4275	PB File	KEM	Hosp-2	Apr-19	General Surgery	GenSx	2019-04-22		Rt Cervical lymph node	Others | Non Essential		32	F		Local anesthesia not supplemented by sedation or GA	Non-Essential	Non-Essential	4	4		Elective
4276	PB File	KEM	Hosp-2	Apr-19	General Surgery	GenSx	2019-04-03		Cervical Lymph node biopsy	Others | Non Essential		25	F		Local anesthesia not supplemented by sedation or GA	Non-Essential	Non-Essential	4	4		Elective
4277	PB File	KEM	Hosp-2	Apr-19	General Surgery	GenSx	2019-04-03		Dermato fibrosarcoma Protuberance of left parotoid region	Others | Non Essential		44	999		General Anaesthesia	Non-Essential	Non-Essential	4	4		Elective
4278	PB File	KEM	Hosp-2	Apr-19	General Surgery	GenSx	2019-04-02		TEP repair (open)	Others | Non Essential		67	999		Regional Anesthesia: Spinal, Epidural and Regional Blocks	Non-Essential	Non-Essential	4	4		Elective
4279	PB File	KEM	Hosp-2	Apr-19	General Surgery	GenSx	2019-04-02		Pilonidal Sinus excision	Others | Non Essential		25	999		Regional Anesthesia: Spinal, Epidural and Regional Blocks	Non-Essential	Non-Essential	4	4		Elective
4280	PB File	KEM	Hosp-2	Apr-19	OBGY	ObGy	2019-04-02		Total Abdominal Hysterectomy with bilateral salpiryectomy	Others | Non Essential		35	F		Regional Anesthesia: Spinal, Epidural and Regional Blocks	Essential	Non-Essential	2	2		Elective
4281	PB File	KEM	Hosp-2	Apr-19	OBGY	ObGy	2019-04-03		Fractional wettage with cervical biopsy with visualisation with acute and xxxx schilles iodine	Others | Non Essential		45	F		Regional Anesthesia: Spinal, Epidural and Regional Blocks	Non-Essential	Non-Essential	4	4		Elective
4282	PB File	KEM	Hosp-2	Apr-19	OBGY	ObGy	2019-04-03		Total Abdominal Hysterectomy with left salpingo oophorectomy with right salpiryectomy	Others | Non Essential		46	F		Regional Anesthesia: Spinal, Epidural and Regional Blocks	Essential	Non-Essential	2	2		Elective
4283	PB File	KEM	Hosp-2	Apr-19	OBGY	ObGy	2019-04-04		Secondary suturing	Others | Non Essential		39	F		Local anesthesia not supplemented by sedation or GA	Non-Essential	Non-Essential	4	4		Elective
4284	PB File	KEM	Hosp-2	Apr-19	OBGY	ObGy	2019-04-05		Total Abdominal Hysterectomy with B/L salpiryectomy	Others | Non Essential		42	F		Regional Anesthesia: Spinal, Epidural and Regional Blocks	Essential	Non-Essential	2	2		Elective
4285	PB File	KEM	Hosp-2	Apr-19	OBGY	ObGy	2019-04-05		Total Abdominal Cysterectomy with B/L Salxxxxxxxx	Others | Non Essential		39	F		Regional Anesthesia: Spinal, Epidural and Regional Blocks	Essential	Non-Essential	2	2		Elective
4286	PB File	KEM	Hosp-2	Apr-19	OBGY	ObGy	2019-04-05		Total Abdominal Hysterectomy with B/L salpingo oophorectomy	Others | Non Essential		999	F		Regional Anesthesia: Spinal, Epidural and Regional Blocks	Essential	Non-Essential	2	2		Elective
4287	PB File	KEM	Hosp-2	Apr-19	OBGY	ObGy	2019-04-08		1st Trixxxxx MTP by xxxxx evacuation and B/L sapingectomy	Others | Non Essential		30	F		Regional Anesthesia: Spinal, Epidural and Regional Blocks	Essential	Non-Essential	4	4		Elective
4288	PB File	KEM	Hosp-2	Apr-19	OBGY	ObGy	2019-04-10		Total Abdominal Hysterectomy with B/L salpingecromy	Others | Non Essential		36	F		Regional Anesthesia: Spinal, Epidural and Regional Blocks	Essential	Non-Essential	2	2		Elective
4289	PB File	KEM	Hosp-2	Apr-19	OBGY	ObGy	2019-04-12		Cervical biopsy	Others | Non Essential		35	F		Local anesthesia not supplemented by sedation or GA	Essential	Non-Essential	4	4		Elective
4290	PB File	KEM	Hosp-2	Apr-19	OBGY	ObGy	2019-04-12		Subfocal abdominal cystectomy with B/L salpingectomy	Others | Non Essential		48	F		Regional Anesthesia: Spinal, Epidural and Regional Blocks	Essential	Non-Essential	4	4		Elective
4291	PB File	KEM	Hosp-2	Apr-19	OBGY	ObGy	2019-04-12		Excision of perianal cyst	Others | Non Essential		35	F		Regional Anesthesia: Spinal, Epidural and Regional Blocks	Non-Essential	Non-Essential	4	4		Elective
4292	PB File	KEM	Hosp-2	Apr-19	OBGY	ObGy	2019-04-13		Abdominal Myomectomy	Others | Non Essential		28	F		Regional Anesthesia: Spinal, Epidural and Regional Blocks	Non-Essential	Non-Essential	4	4		Elective
4293	PB File	KEM	Hosp-2	Apr-19	OBGY	ObGy	2019-04-13		Bilateral salphingectay	Others | Non Essential		42	F		Regional Anesthesia: Spinal, Epidural and Regional Blocks	Essential	Non-Essential	Could Not Be Assigned	Could Not Be Assigned		Elective
4294	PB File	KEM	Hosp-2	Apr-19	OBGY	ObGy	2019-04-15		Total Abdominal hysterectomy with oppohxxx salpingectomy	Others | Non Essential		32	F		Regional Anesthesia: Spinal, Epidural and Regional Blocks	Non-Essential	Non-Essential	2	2		Elective
4295	PB File	KEM	Hosp-2	Apr-19	OBGY	ObGy	2019-04-16		Total Abdominal Hysterectomy with Bilateral salpingo-oophorectomy	Others | Non Essential		37	F		Regional Anesthesia: Spinal, Epidural and Regional Blocks	Non-Essential	Non-Essential	2	2		Elective
4296	PB File	KEM	Hosp-2	Apr-19	OBGY	ObGy	2019-04-17		Abdominal Myomectomy	Others | Non Essential		30	F		Regional Anesthesia: Spinal, Epidural and Regional Blocks	Non-Essential	Non-Essential	4	4		elective
4297	PB File	KEM	Hosp-2	Apr-19	OBGY	ObGy	2019-04-20		Total Abdominal Hysterectomy with Bilateral Salphingectomy	Others | Non Essential		45	F		Regional Anesthesia: Spinal, Epidural and Regional Blocks	Essential	Non-Essential	2	2		Elective
4298	PB File	KEM	Hosp-2	Apr-19	OBGY	ObGy	2019-04-22		Hysteroscopy with fractional curettage	Dilatation and curettage		40	F		Sedation	Essential	Essential	1	1		emergency
4299	PB File	KEM	Hosp-2	Apr-19	OBGY	ObGy	2019-04-22		Total Abdominal hysterectomy with B/L salpingo-oophorectomy	Others | Non Essential		49	F		Regional Anesthesia: Spinal, Epidural and Regional Blocks	Essential	Non-Essential	2	2		Elective
4300	PB File	KEM	Hosp-2	Apr-19	OBGY	ObGy	2019-04-24		Fractional curettage	Others | Non Essential		43	F		Sedation	Essential	Non-Essential	1	1		emergency
4301	PB File	KEM	Hosp-2	Apr-19	OBGY	ObGy	2019-04-25		Laparoscopic tubal ligation	Others | Non Essential		28	F		General Anaesthesia	Essential	Non-Essential	4	4		elective
4302	PB File	KEM	Hosp-2	Apr-19	OBGY	ObGy	2019-04-26		Fractional curettage	Others | Non Essential		49	F		Sedation	Non-Essential	Non-Essential	1	1		emergency
4303	PB File	KEM	Hosp-2	Apr-19	OBGY	ObGy	2019-04-30		Vaginal Septum Excision	Others | Non Essential		25	F		Regional Anesthesia: Spinal, Epidural and Regional Blocks	Non-Essential	Non-Essential	4	4		elective
4304	PB File	KEM	Hosp-2	Apr-19	OBGY	ObGy	2019-04-30		Daignostic hysterectomy and D and C, Diagnostic laproscopyand chromopertubation a nd endometrial spot Cu uterisation	Others | Non Essential		36	F		Not available	Non-Essential	Non-Essential	2	2		Elective
4305	PB File	KEM	Hosp-2	Apr-19	OBGY	ObGy	2019-04-01		Colposcopy guided cervical biopsy with fractional curettage	Others | Non Essential		40	F		Sedation	Non-Essential	Non-Essential	4	4		elective
4306	PB File	KEM	Hosp-2	Apr-19	OBGY	ObGy	2019-04-01		Caserian hysterectomy and bladder rent repair with left ureterostomy with	Others | Non Essential		28	F		General Anaesthesia	Non-Essential	Non-Essential	1	1		emergency
4307	PB File	KEM	Hosp-2	Apr-19	OBGY	ObGy	2019-04-01		Secondary suturing	Others | Non Essential		22	F		Not available	Non-Essential	Non-Essential	4	4		elective
4308	PB File	KEM	Hosp-2	Apr-19	OBGY	ObGy	2019-04-03		Eleective lower segment caserian section with b/l tubal ligation	Others | Non Essential		27	F		Regional Anesthesia: Spinal, Epidural and Regional Blocks	Non-Essential	Non-Essential	1	1		emergency
4309	PB File	KEM	Hosp-2	Apr-19	OBGY	ObGy	2019-04-03		Secondary suturing	Others | Non Essential		29	F		Not available	Non-Essential	Non-Essential	4	4		elective
4310	PB File	KEM	Hosp-2	Apr-19	OBGY	ObGy	2019-04-04		Manual removal of placenta	Others | Non Essential		24	F		Sedation	Non-Essential	Non-Essential	1	1		emergency
4311	PB File	KEM	Hosp-2	Apr-19	OBGY	ObGy	2019-04-08		Colproscopy with fractional curettage with cervical biopsy	Dilatation and curettage		40	F		Sedation	Essential	Essential	1	1		emergency
4312	PB File	KEM	Hosp-2	Apr-19	OBGY	ObGy	2019-04-09		Fractional Curettage	Others | Non Essential		60	F		Sedation	Essential	Non-Essential	1	1		emergency
4313	PB File	KEM	Hosp-2	Apr-19	OBGY	ObGy	2019-04-09		Fractional Curettage	Others | Non Essential		40	F		Sedation	Essential	Non-Essential	1	1		emergency
4314	PB File	KEM	Hosp-2	Apr-19	OBGY	ObGy	2019-04-11		Obsrtetric Hysterectomy	Others | Non Essential		999	F		General Anaesthesia	Non-Essential	Non-Essential	1	1		emergency
4315	PB File	KEM	Hosp-2	Apr-19	OBGY	ObGy	2019-04-11		Caserian Subtotal Obstructive Hysterectomy	Others | Non Essential		28	F		General Anaesthesia	Essential	Non-Essential	1	1		emergency
4316	PB File	KEM	Hosp-2	Apr-19	OBGY	ObGy	2019-04-11		Fractional Curettage	Others | Non Essential		55	F		Not available	Essential	Non-Essential	1	1		emergency
4317	PB File	KEM	Hosp-2	Apr-19	OBGY	ObGy	2019-04-13		Extranuclear tender anaesthesiaxxxx	Others | Non Essential		17	F		Sedation	Non-Essential	Non-Essential	Could Not Be Assigned	Could Not Be Assigned		Elective
4318	PB File	KEM	Hosp-2	Apr-19	OBGY	ObGy	2019-04-14		Secondary suturing	Others | Non Essential		61	F		Sedation	Non-Essential	Non-Essential	4	4		Elective
4319	PB File	KEM	Hosp-2	Apr-19	OBGY	ObGy	2019-04-18		Minilapotomy tubal ligation	Others | Non Essential		38	F		Regional Anesthesia: Spinal, Epidural and Regional Blocks	Non-Essential	Non-Essential	4	4		elective
4320	PB File	KEM	Hosp-2	Apr-19	OBGY	ObGy	2019-04-18		MInilapotomy tubal ligation	Others | Non Essential		35	F		Regional Anesthesia: Spinal, Epidural and Regional Blocks	Non-Essential	Non-Essential	4	4		elective
4321	PB File	KEM	Hosp-2	Apr-19	OBGY	ObGy	2019-04-19		Colproscopy guided cervical biopsy	Others | Non Essential		34	F		Sedation	Non-Essential	Non-Essential	Could Not Be Assigned	Could Not Be Assigned		elective
4322	PB File	KEM	Hosp-2	Apr-19	OBGY	ObGy	2019-04-20		Secondary suturing	Others | Non Essential		23	F		Sedation	Non-Essential	Non-Essential	4	4		elective
4323	PB File	KEM	Hosp-2	Apr-19	OBGY	ObGy	2019-04-20		Secondary suturing	Others | Non Essential		44	F		Local anesthesia not supplemented by sedation or GA	Non-Essential	Non-Essential	4	4		elective
4324	PB File	KEM	Hosp-2	Apr-19	OBGY	ObGy	2019-04-21		EEL with Ureteric DJ stenting f/b bladder base reconstruction	Others | Non Essential		28	F		General Anaesthesia	Non-Essential	Non-Essential	1	1		emergency
4325	PB File	KEM	Hosp-2	Apr-19	OBGY	ObGy	2019-04-21		EL with left cystectomy with left ovarian reconstruction with B/L round ligament plication	Others | Non Essential		29	F		Regional Anesthesia: Spinal, Epidural and Regional Blocks	Non-Essential	Non-Essential	2	2		elective
4326	PB File	KEM	Hosp-2	Apr-19	OBGY	ObGy	2019-04-21		Secondary suturing	Others | Non Essential		35	F		Local anesthesia not supplemented by sedation or GA	Non-Essential	Non-Essential	4	4		elective
4337	PB File	KEM	Hosp-2	Apr-19	Ortho	Ortho	2019-04-01		Left $$ # $	Others | Non Essential		8	M		General Anaesthesia	Non-Essential	Non-Essential	2	2		Elective
4338	PB File	KEM	Hosp-2	Apr-19	Ortho	Ortho	2019-04-03		Left $$	Others | Non Essential		999	M		General Anaesthesia	Non-Essential	Non-Essential	2	2		Elective
4339	PB File	KEM	Hosp-2	Apr-19	Ortho	Ortho	2019-04-06		Femoral embolectomy + Graft imposition	Others | Non Essential		58	M		General Anaesthesia	Non-Essential	Non-Essential	Could Not Be Assigned	Could Not Be Assigned		Elective
4340	PB File	KEM	Hosp-2	Apr-19	Ortho	Ortho	2019-04-06		Left $ deformity correction	Others | Non Essential		48	F		Regional Anesthesia: Spinal, Epidural and Regional Blocks	Non-Essential	Non-Essential	4	4		Elective
4341	PB File	KEM	Hosp-2	Apr-19	Ortho	Ortho	2019-04-07		Right below $$	Others | Non Essential		81	M		General Anaesthesia	Non-Essential	Non-Essential	Could Not Be Assigned	Could Not Be Assigned		Elective
4342	PB File	KEM	Hosp-2	Apr-19	Ortho	Ortho	2019-04-05		Left $	Others | Non Essential		25	M		General Anaesthesia	Non-Essential	Non-Essential	Could Not Be Assigned	Could Not Be Assigned		Elective
4343	PB File	KEM	Hosp-2	Apr-19	Ortho	Ortho	2019-04-08		Left Philos	Others | Non Essential		60	F		General Anaesthesia	Non-Essential	Non-Essential	Could Not Be Assigned	Could Not Be Assigned		Elective
4344	PB File	KEM	Hosp-2	Apr-19	Ortho	Ortho	2019-04-15		Right calcaneal # plating	Others | Non Essential		52	M		Regional Anesthesia: Spinal, Epidural and Regional Blocks	Non-Essential	Non-Essential	4	4		Elective
4345	PB File	KEM	Hosp-2	Apr-19	Ortho	Ortho	2019-04-27		IT # external fixator sos $$$	external fixator		12	F		General Anaesthesia	Essential	Essential	1	1		emergency
4346	PB File	KEM	Hosp-2	Apr-19	Ortho	Ortho	2019-04-30		Left $$ # ORIFwith philos	Others | Non Essential		51	F		General Anaesthesia	Non-Essential	Non-Essential	2	2		emergency
4347	PB File	KEM	Hosp-2	Apr-19	Ortho	Ortho	2019-05-01		Compound # tibia & hip dislocation	external fixator		40	M		Regional Anesthesia: Spinal, Epidural and Regional Blocks	Essential	Essential	1	1		emergency
[truncated: 3,073 more rows]
